# Supplementary material for: Regulatory mechanism of Scutellaria baicalensis Georgi on bone cancer pain based on network pharmacology and experimental verification
Source: PeerJ journal article supplement (doi:10.7717/peerj.14394), 2022-11-17
Supplement: Raw_Data.zip [file Baicalein-GAT-JXFSS_data.xls]

## Sheet: Sample Setup
Block Type	96alum
Chemistry	SYBR_GREEN
Experiment File Name	C:\Users\Administrator\Desktop\20211101-GAT-JXFSS.eds
Experiment Run End Time	Not Started
Instrument Type	sds7500
Passive Reference	ROX
Well	Sample Name	Sample Color	Biogroup Name	Biogroup Color	Target Name	Target Color	Task	Reporter	Quencher	Comments
A1	NC	RGB(168,255,222)			AXL	RGB(244,165,230)	UNKNOWN	SYBR	None
A2	10	RGB(223,221,142)			AXL	RGB(244,165,230)	UNKNOWN	SYBR	None
A3	20	RGB(247,255,168)			AXL	RGB(244,165,230)	UNKNOWN	SYBR	None
A4	30	RGB(180,255,0)			AXL	RGB(244,165,230)	UNKNOWN	SYBR	None
A5	40	RGB(255,204,153)			AXL	RGB(244,165,230)	UNKNOWN	SYBR	None
A6	50	RGB(253,138,88)			AXL	RGB(244,165,230)	UNKNOWN	SYBR	None
A7	120	RGB(132,193,241)			VEGFA	RGB(139,189,249)	UNKNOWN	SYBR	None
A8	120	RGB(132,193,241)			JUN	RGB(208,243,98)	UNKNOWN	SYBR	None
A9
A10	120	RGB(132,193,241)			MAPK3	RGB(244,165,230)	UNKNOWN	SYBR	None
A11
A12
B1	NC	RGB(168,255,222)			AXL	RGB(244,165,230)	UNKNOWN	SYBR	None
B2	10	RGB(223,221,142)			AXL	RGB(244,165,230)	UNKNOWN	SYBR	None
B3	20	RGB(247,255,168)			AXL	RGB(244,165,230)	UNKNOWN	SYBR	None
B4	30	RGB(180,255,0)			AXL	RGB(244,165,230)	UNKNOWN	SYBR	None
B5	40	RGB(255,204,153)			AXL	RGB(244,165,230)	UNKNOWN	SYBR	None
B6	50	RGB(253,138,88)			AXL	RGB(244,165,230)	UNKNOWN	SYBR	None
B7	120	RGB(132,193,241)			VEGFA	RGB(139,189,249)	UNKNOWN	SYBR	None
B8	120	RGB(132,193,241)			JUN	RGB(208,243,98)	UNKNOWN	SYBR	None
B9
B10	120	RGB(132,193,241)			MAPK3	RGB(244,165,230)	UNKNOWN	SYBR	None
B11
B12
C1	NC	RGB(168,255,222)			AXL	RGB(244,165,230)	UNKNOWN	SYBR	None
C2	10	RGB(223,221,142)			AXL	RGB(244,165,230)	UNKNOWN	SYBR	None
C3	20	RGB(247,255,168)			AXL	RGB(244,165,230)	UNKNOWN	SYBR	None
C4	30	RGB(180,255,0)			AXL	RGB(244,165,230)	UNKNOWN	SYBR	None
C5	40	RGB(255,204,153)			AXL	RGB(244,165,230)	UNKNOWN	SYBR	None
C6	50	RGB(253,138,88)			AXL	RGB(244,165,230)	UNKNOWN	SYBR	None
C7	120	RGB(132,193,241)			VEGFA	RGB(139,189,249)	UNKNOWN	SYBR	None
C8	120	RGB(132,193,241)			JUN	RGB(208,243,98)	UNKNOWN	SYBR	None
C9
C10	120	RGB(132,193,241)			MAPK3	RGB(244,165,230)	UNKNOWN	SYBR	None
C11
C12
D1	NC	RGB(168,255,222)			GAPDH-H	RGB(255,191,168)	UNKNOWN	SYBR	None
D2	10	RGB(223,221,142)			GAPDH-H	RGB(255,191,168)	UNKNOWN	SYBR	None
D3	20	RGB(247,255,168)			GAPDH-H	RGB(255,191,168)	UNKNOWN	SYBR	None
D4	30	RGB(180,255,0)			GAPDH-H	RGB(255,191,168)	UNKNOWN	SYBR	None
D5	40	RGB(255,204,153)			GAPDH-H	RGB(255,191,168)	UNKNOWN	SYBR	None
D6	50	RGB(253,138,88)			GAPDH-H	RGB(255,191,168)	UNKNOWN	SYBR	None
D7	240	RGB(132,193,241)			VEGFA	RGB(139,189,249)	UNKNOWN	SYBR	None
D8	240	RGB(132,193,241)			JUN	RGB(208,243,98)	UNKNOWN	SYBR	None
D9
D10	240	RGB(132,193,241)			MAPK3	RGB(244,165,230)	UNKNOWN	SYBR	None
D11
D12
E1	NC	RGB(168,255,222)			GAPDH-H	RGB(255,191,168)	UNKNOWN	SYBR	None
E2	10	RGB(223,221,142)			GAPDH-H	RGB(255,191,168)	UNKNOWN	SYBR	None
E3	20	RGB(247,255,168)			GAPDH-H	RGB(255,191,168)	UNKNOWN	SYBR	None
E4	30	RGB(180,255,0)			GAPDH-H	RGB(255,191,168)	UNKNOWN	SYBR	None
E5	40	RGB(255,204,153)			GAPDH-H	RGB(255,191,168)	UNKNOWN	SYBR	None
E6	50	RGB(253,138,88)			GAPDH-H	RGB(255,191,168)	UNKNOWN	SYBR	None
E7	240	RGB(132,193,241)			VEGFA	RGB(139,189,249)	UNKNOWN	SYBR	None
E8	240	RGB(132,193,241)			JUN	RGB(208,243,98)	UNKNOWN	SYBR	None
E9
E10	240	RGB(132,193,241)			MAPK3	RGB(244,165,230)	UNKNOWN	SYBR	None
E11
E12
F1	NC	RGB(168,255,222)			GAPDH-H	RGB(255,191,168)	UNKNOWN	SYBR	None
F2	10	RGB(223,221,142)			GAPDH-H	RGB(255,191,168)	UNKNOWN	SYBR	None
F3	20	RGB(247,255,168)			GAPDH-H	RGB(255,191,168)	UNKNOWN	SYBR	None
F4	30	RGB(180,255,0)			GAPDH-H	RGB(255,191,168)	UNKNOWN	SYBR	None
F5	40	RGB(255,204,153)			GAPDH-H	RGB(255,191,168)	UNKNOWN	SYBR	None
F6	50	RGB(253,138,88)			GAPDH-H	RGB(255,191,168)	UNKNOWN	SYBR	None
F7	240	RGB(132,193,241)			VEGFA	RGB(139,189,249)	UNKNOWN	SYBR	None
F8	240	RGB(132,193,241)			JUN	RGB(208,243,98)	UNKNOWN	SYBR	None
F9
F10	240	RGB(132,193,241)			MAPK3	RGB(244,165,230)	UNKNOWN	SYBR	None
F11
F12
G1	120	RGB(132,193,241)			IL6	RGB(255,191,168)	UNKNOWN	SYBR	None
G2	120	RGB(132,193,241)			IL6	RGB(255,191,168)	UNKNOWN	SYBR	None
G3	120	RGB(132,193,241)			IL6	RGB(255,191,168)	UNKNOWN	SYBR	None
G4	120	RGB(132,193,241)			TNF	RGB(139,189,249)	UNKNOWN	SYBR	None
G5	120	RGB(132,193,241)			TNF	RGB(139,189,249)	UNKNOWN	SYBR	None
G6	120	RGB(132,193,241)			TNF	RGB(139,189,249)	UNKNOWN	SYBR	None
G7	120	RGB(132,193,241)			GAPDH-M	RGB(208,243,98)	UNKNOWN	SYBR	None
G8	120	RGB(132,193,241)			GAPDH-M	RGB(208,243,98)	UNKNOWN	SYBR	None
G9
G10	120	RGB(132,193,241)			GAPDH-M	RGB(208,243,98)	UNKNOWN	SYBR	None
G11
G12
H1	240	RGB(132,193,241)			IL6	RGB(255,191,168)	UNKNOWN	SYBR	None
H2	240	RGB(132,193,241)			IL6	RGB(255,191,168)	UNKNOWN	SYBR	None
H3	240	RGB(132,193,241)			IL6	RGB(255,191,168)	UNKNOWN	SYBR	None
H4	240	RGB(132,193,241)			TNF	RGB(139,189,249)	UNKNOWN	SYBR	None
H5	240	RGB(132,193,241)			TNF	RGB(139,189,249)	UNKNOWN	SYBR	None
H6	240	RGB(132,193,241)			TNF	RGB(139,189,249)	UNKNOWN	SYBR	None
H7	240	RGB(132,193,241)			GAPDH-M	RGB(208,243,98)	UNKNOWN	SYBR	None
H8	240	RGB(132,193,241)			GAPDH-M	RGB(208,243,98)	UNKNOWN	SYBR	None
H9
H10	240	RGB(132,193,241)			GAPDH-M	RGB(208,243,98)	UNKNOWN	SYBR	None
H11
H12

## Sheet: Results
Block Type	96alum
Chemistry	SYBR_GREEN
Experiment File Name	C:\Users\Administrator\Desktop\20211101-GAT-JXFSS.eds
Experiment Run End Time	Not Started
Instrument Type	sds7500
Passive Reference	ROX
Well	Sample Name	Target Name	Task	Reporter	Quencher	RQ	RQ Min	RQ Max	Cт	Cт Mean	Cт SD	ΔCт	ΔCт Mean	ΔCт SE	HK Control ΔCт Mean	HK Control ΔCт SE	ΔΔCт	Automatic Ct Threshold	Ct Threshold	Automatic Baseline	Baseline Start	Baseline End	Efficiency	Tm1	Tm2	Tm3	Comments
G7	120	GAPDH-M	UNKNOWN	SYBR	None				14.9058	14.9366	0.0321551							TRUE	0.177392	TRUE	3	9	1	85.4878
G8	120	GAPDH-M	UNKNOWN	SYBR	None				14.97	14.9366	0.0321551							TRUE	0.177392	TRUE	3	10	1	85.4878
G10	120	GAPDH-M	UNKNOWN	SYBR	None				14.9342	14.9366	0.0321551							TRUE	0.177392	TRUE	3	10	1	85.305
H7	240	GAPDH-M	UNKNOWN	SYBR	None				15.7311	15.7424	0.067579							TRUE	0.177392	TRUE	3	11	1	85.1221
H8	240	GAPDH-M	UNKNOWN	SYBR	None				15.6812	15.7424	0.067579							TRUE	0.177392	TRUE	3	11	1	85.1221
H10	240	GAPDH-M	UNKNOWN	SYBR	None				15.815	15.7424	0.067579							TRUE	0.177392	TRUE	3	11	1	85.1221
G1	120	IL6	UNKNOWN	SYBR	None	1	0.897519	1.11418	27.6506	27.7539	0.0918437		12.8173	0.0561819			0	TRUE	0.185072	TRUE	3	23	1	80.0017
G2	120	IL6	UNKNOWN	SYBR	None	1	0.897519	1.11418	27.8263	27.7539	0.0918437		12.8173	0.0561819			0	TRUE	0.185072	TRUE	3	23	1	80.0017
G3	120	IL6	UNKNOWN	SYBR	None	1	0.897519	1.11418	27.7849	27.7539	0.0918437		12.8173	0.0561819			0	TRUE	0.185072	TRUE	3	22	1	80.0017
H1	240	IL6	UNKNOWN	SYBR	None	0.701515	0.580887	0.847194	29.2353	29.0711	0.155794		13.3287	0.0980453			0.511453	TRUE	0.185072	TRUE	3	24	1	79.6359
H2	240	IL6	UNKNOWN	SYBR	None	0.701515	0.580887	0.847194	28.9254	29.0711	0.155794		13.3287	0.0980453			0.511453	TRUE	0.185072	TRUE	3	24	1	79.6359
H3	240	IL6	UNKNOWN	SYBR	None	0.701515	0.580887	0.847194	29.0527	29.0711	0.155794		13.3287	0.0980453			0.511453	TRUE	0.185072	TRUE	3	24	1	79.8188
B8	120	JUN	UNKNOWN	SYBR	None	1	0.904303	1.10582	21.9381	21.8964	0.0589031		6.9598	0.0456008			0	TRUE	0.21077	TRUE	3	17	1	88.9624
C8	120	JUN	UNKNOWN	SYBR	None	1	0.904303	1.10582	21.8548	21.8964	0.0589031		6.9598	0.0456008			0	TRUE	0.21077	TRUE	3	17	1	89.1453
D8	240	JUN	UNKNOWN	SYBR	None	1.18292	1.04183	1.34312	22.4906	22.4599	0.0921909		6.71744	0.0659952			-0.242354	TRUE	0.21077	TRUE	3	17	1	89.1453
E8	240	JUN	UNKNOWN	SYBR	None	1.18292	1.04183	1.34312	22.5328	22.4599	0.0921909		6.71744	0.0659952			-0.242354	TRUE	0.21077	TRUE	3	17	1	88.9624
F8	240	JUN	UNKNOWN	SYBR	None	1.18292	1.04183	1.34312	22.3562	22.4599	0.0921909		6.71744	0.0659952			-0.242354	TRUE	0.21077	TRUE	3	17	1	88.9624
A10	120	MAPK3	UNKNOWN	SYBR	None	1	0.963563	1.03781	22.946	22.9371	0.00905618		8.00042	0.019287			0	TRUE	0.202078	TRUE	3	17	1	86.768
B10	120	MAPK3	UNKNOWN	SYBR	None	1	0.963563	1.03781	22.9279	22.9371	0.00905618		8.00042	0.019287			0	TRUE	0.202078	TRUE	3	18	1	86.768
C10	120	MAPK3	UNKNOWN	SYBR	None	1	0.963563	1.03781	22.9372	22.9371	0.00905618		8.00042	0.019287			0	TRUE	0.202078	TRUE	3	18	1	86.9508
D10	240	MAPK3	UNKNOWN	SYBR	None	0.452107	0.413368	0.494476	24.8379	24.8881	0.0439671		9.14568	0.0465476			1.14526	TRUE	0.202078	TRUE	3	20	1	86.768
E10	240	MAPK3	UNKNOWN	SYBR	None	0.452107	0.413368	0.494476	24.9067	24.8881	0.0439671		9.14568	0.0465476			1.14526	TRUE	0.202078	TRUE	3	19	1	86.768
F10	240	MAPK3	UNKNOWN	SYBR	None	0.452107	0.413368	0.494476	24.9198	24.8881	0.0439671		9.14568	0.0465476			1.14526	TRUE	0.202078	TRUE	3	20	1	86.768
G4	120	TNF	UNKNOWN	SYBR	None	1	0.946256	1.0568	25.9301	25.9049	0.0379211		10.9682	0.0287052			0	TRUE	0.142236	TRUE	3	21	1	81.0989
G5	120	TNF	UNKNOWN	SYBR	None	1	0.946256	1.0568	25.9232	25.9049	0.0379211		10.9682	0.0287052			0	TRUE	0.142236	TRUE	3	21	1	80.916
G6	120	TNF	UNKNOWN	SYBR	None	1	0.946256	1.0568	25.8613	25.9049	0.0379211		10.9682	0.0287052			0	TRUE	0.142236	TRUE	3	21	1	81.2818
H4	240	TNF	UNKNOWN	SYBR	None	1.84419	1.54616	2.19965	25.9412	25.8277	0.143522		10.0852	0.0915886			-0.882984	TRUE	0.142236	TRUE	3	21	1	80.916
H5	240	TNF	UNKNOWN	SYBR	None	1.84419	1.54616	2.19965	25.8755	25.8277	0.143522		10.0852	0.0915886			-0.882984	TRUE	0.142236	TRUE	3	21	1	80.7332
H6	240	TNF	UNKNOWN	SYBR	None	1.84419	1.54616	2.19965	25.6663	25.8277	0.143522		10.0852	0.0915886			-0.882984	TRUE	0.142236	TRUE	3	21	1	80.7332
A7	120	VEGFA	UNKNOWN	SYBR	None	1	0.960785	1.04082	20.7597	20.76	0.0161978		5.82336	0.0207872			0	TRUE	0.1725	TRUE	3	16	1	84.7564
B7	120	VEGFA	UNKNOWN	SYBR	None	1	0.960785	1.04082	20.7439	20.76	0.0161978		5.82336	0.0207872			0	TRUE	0.1725	TRUE	3	16	1	84.9392
C7	120	VEGFA	UNKNOWN	SYBR	None	1	0.960785	1.04082	20.7763	20.76	0.0161978		5.82336	0.0207872			0	TRUE	0.1725	TRUE	3	16	1	84.9392
D7	240	VEGFA	UNKNOWN	SYBR	None	0.767218	0.710928	0.827965	21.9436	21.9481	0.0116799		6.20565	0.0395952			0.382291	TRUE	0.1725	TRUE	3	17	1	84.9392
E7	240	VEGFA	UNKNOWN	SYBR	None	0.767218	0.710928	0.827965	21.9613	21.9481	0.0116799		6.20565	0.0395952			0.382291	TRUE	0.1725	TRUE	3	17	1	84.9392
F7	240	VEGFA	UNKNOWN	SYBR	None	0.767218	0.710928	0.827965	21.9393	21.9481	0.0116799		6.20565	0.0395952			0.382291	TRUE	0.1725	TRUE	3	17	1	84.7564
Analysis Type	Singleplex
Endogenous Control	GAPDH-M
RQ Min/Max Confidence Level	95.0
Reference Sample	120
	0	240-IL6			240-JUN			240-MAPK3				240-TNF			240-VEGFA
CT	31.3974	29.2353		29.0041	22.4906		24.2249	24.8379			36.028	25.9412		23.4913	21.9436
	31.75	28.9254		29.0808	22.5328		24.1794	24.9067			35.9339	25.8755		23.4166	21.9613
	30.9229	29.0527		29.4204	22.3562		24.204	24.9198				25.6663		23.3787	21.9393
Internal reference	14.5899	15.7311		14.5899	15.7311		14.5899	15.7311			14.5899	15.7311		14.5899	15.7311
	14.5984	15.6812		14.5984	15.6812		14.5984	15.6812			14.5984	15.6812		14.5984	15.6812
	14.6106	15.815		14.6106	15.815		14.6106	15.815			14.6106	15.815		14.6106	15.815
average	14.5996	15.7424		14.5996	15.7424		14.5996	15.7424			14.5996	15.7424		14.5996	15.7424
△CT	16.7978	13.4929		14.4045	6.74819		9.62524	9.09548			21.4284	10.1987		8.89165	6.2012
	17.1504	13.183		14.4812	6.79033		9.57976	9.16424			21.3343	10.1331		8.81695	6.2189
	16.3232	13.3103		14.8207	6.61381		9.60432	9.17733			-14.5996	9.92391		8.77908	6.19685
△CT average	16.7571			14.5688			9.60311				9.38766			8.82922
△△CT	0.0406316	-3.26424		-0.164324	-7.8206		0.0221284	-0.507627			12.0407	0.811081		0.0624224	-2.62802
	0.393266	-3.57419		-0.087628	-7.77845		-0.0233447	-0.438871			11.9466	0.745388		-0.0122751	-2.61032
	-0.433898	-3.44686		0.251952	-7.95498		0.00121625	-0.425775			-23.9873	0.536246		-0.0501474	-2.63237
RQ	0.972229	9.60803		1.12064	226.066		0.984779	1.42171			0.000237349	0.569955		0.957655	6.18178
	0.761404	11.9107		1.06262	219.557		1.01631	1.35554			0.000253347	0.596507		1.00854	6.10639
	1.35088	10.9046		0.839759	248.134		0.999157	1.34329				0.689563		1.03537	6.20044
	0	120-IL6			120-JUN			120-MAPK3				120-TNF			120-VEGFA
CT	30.6289	27.6506		24.7759	21.9381		21.8165	22.946			31.6863	25.9301		21.5934	20.7597
	30.2894	27.8263		25.2583	21.8548		21.7242	22.9279			31.5999	25.9232		21.4834	20.7439
	30.6123	27.7849					21.6813	22.9372				25.8613		21.3441	20.7763
Internal reference	14.0496	14.9058		14.0496	14.9058		14.0496	14.9058			14.0496	14.9058		14.0496	14.9058
	14.0618	14.97		14.0618	14.97		14.0618	14.97			14.0618	14.97		14.0618	14.97
	14.0371	14.9342			14.9342		14.0371	14.9342				14.9342		14.0371	14.9342
average	14.0495	14.9366		14.0557	14.9366		14.0495	14.9366			14.0557	14.9366		14.0495	14.9366
△CT	16.5794	12.7139		10.7202	7.00145		7.76701	8.00939			17.6307	10.9935		7.54389	5.8231
	16.24	12.8896		11.2026	6.91814		7.6747	7.99128			17.5443	10.9866		7.43393	5.8073
	16.5629	12.8482					7.63186	8.00058			-14.0557	10.9246		7.29464	5.83969
△CT average	16.4608			10.9614			7.69119				7.03975			7.42415
△△CT	0.118668	-3.74683		-0.241183	-3.95998		0.075819	0.318206			10.5909	3.95371		0.119737	-1.60105
	-0.220783	-3.57114		0.241183	-4.04328		-0.016489	0.300096			10.5045	3.94683		0.00977643	-1.61686
	0.102114	-3.61254					-0.05933	0.309389			-21.0954	3.88486		-0.129513	-1.58446
RQ	0.921037	13.4248		1.18196	15.5623		0.948803	0.802066			0.000648359	0.0645379		0.920355	3.03364
	1.16537	11.8856		0.846051	16.4873		1.01149	0.812198			0.000688384	0.0648463		0.993246	3.06706
	0.931667	12.2316					1.04198	0.806984				0.0676925		1.09392	2.99896

## Sheet: Raw Data
Block Type	96alum
Chemistry	SYBR_GREEN
Experiment File Name	C:\Users\Administrator\Desktop\20211101-GAT-JXFSS.eds
Experiment Run End Time	Not Started
Instrument Type	sds7500
Passive Reference	ROX
Well	Cycle	1	2	3	4	5
A1	1	82218.4	11750.6	26164.8	193078	4330.57
A2	1	113118	20039.5	37641.1	233799	10796.4
A3	1	46563.6	7214.98	31890.4	228274	2615.19
A4	1	31205.8	4257.68	29954.9	213301	1597.63
A5	1	29175.1	4343.35	32945.4	225417	1869.84
A6	1	32457.1	5384.01	34670.2	230989	2146.74
A7	1	29601.6	4150.77	30134.5	204647	1507.2
A8	1	36636.1	4908.97	29463.5	201733	1613.61
A9	1	31523.4	4288.62	2973.17	4137.5	1984.38
A10	1	37009.9	5432.2	26838.3	191928	2018.15
A11	1	64454.7	7657.82	5318.2	6519	2400.89
A12	1	104869	13613.3	7891.95	10545.4	4146.2
B1	1	62549.4	8433.91	25989.7	197800	2690.4
B2	1	42080.6	6601.86	30331.1	221911	2268.7
B3	1	43117.4	6237.43	31012.6	213850	1909.24
B4	1	30487.2	3906.52	33149	225936	1643.8
B5	1	28203.8	4248.81	32870.2	213972	1533.3
B6	1	24183	3643.79	33964.5	222118	1298.08
B7	1	29099.1	4301.21	32479	210286	1049.35
B8	1	30086.8	6552.62	37835.6	225058	1434.53
B9	1	17422.9	2182.64	1351.01	2233.67	878.835
B10	1	25456.8	3410.18	27322.6	196937	1170.92
B11	1	76876.1	11014.2	6717.52	9191.09	3404.95
B12	1	78645	9053.22	5315.91	6842.23	2817.35
C1	1	153349	20390.9	40306.8	258283	4707.14
C2	1	43321.2	6980.19	34004.3	240619	2228.73
C3	1	29645.1	4659.82	34037.6	232254	1635.38
C4	1	71659.9	11109.6	43844.7	265498	3102.9
C5	1	24233.7	3911.82	39081.3	249559	1726.27
C6	1	25135.1	4104.36	38876.5	242467	1209.46
C7	1	86291.6	10763.8	37650.7	217866	1871.22
C8	1	41085.6	6637.9	37064.6	228940	2294.77
C9	1	16552.5	1858.42	1304.78	1872.79	602.075
C10	1	26041.2	3914.46	29719.8	206369	1310.96
C11	1	22180.7	2902.21	1849.23	2701.48	893.251
C12	1	35633.2	4618.34	2731.04	3859.19	1262.43
D1	1	32082.1	4805.83	27519.6	216968	2031.61
D2	1	33428.4	4870.35	30521.1	215758	1570.76
D3	1	32549.4	4874.87	32357.1	214964	1640.11
D4	1	55978.2	9153.87	38351	228417	3247.02
D5	1	21304	3510.28	34287.8	215530	986.255
D6	1	25397.5	4245.74	36079.8	221725	1524.2
D7	1	22953.3	3758.78	35295.1	218863	963.779
D8	1	25793.4	4283.76	35285.9	221437	1130.48
D9	1	35130	5175.9	2977.43	3554.07	1199.79
D10	1	47966.2	8796.64	36117	221195	3165.17
D11	1	29073.4	4080.07	2504.55	3529.04	904.893
D12	1	44693.4	5923.93	3807.44	4682.72	1893.8
E1	1	47437.3	6636.27	29258	221701	1962.76
E2	1	33843.6	4929.71	30653.5	217676	2495.19
E3	1	39719.2	7682.33	34761.1	213753	2114.53
E4	1	27780.2	4476.18	36040.1	229049	1350.25
E5	1	42662.1	7801.55	40657.1	235650	2092.14
E6	1	21595.8	3742.99	36205.3	222725	1182.28
E7	1	25391.8	4119.66	35342.9	215848	1021.32
E8	1	26433.9	4262.67	33990	210688	967.575
E9	1	14254.1	1935.29	1206.45	1892.45	397.916
E10	1	26923.7	4203.24	31918	214672	1431.34
E11	1	130108	20016.5	12595.5	14997.1	5627.07
E12	1	98328.8	15791.5	10823	14626.4	6514.88
F1	1	111632	18479.6	35409.1	220340	5466.75
F2	1	27608.7	4317.13	29635.8	218983	1374.78
F3	1	23950.1	3745.06	30198.7	207848	1674.78
F4	1	29890.3	5376.12	33478.5	212099	2805.09
F5	1	69523.3	11799.6	41530.6	238714	3573.85
F6	1	54577.2	9934.3	37675.6	215567	3206.65
F7	1	24318.4	3727.55	35757.2	224555	1024.42
F8	1	29199.9	4542.35	33723.5	211981	1393.52
F9	1	22638.6	3024.69	1874.79	3170.42	1189.9
F10	1	31926.2	4588.67	31980.8	213672	1451.43
F11	1	29165.5	4014.51	2451.54	3217.54	1726.95
F12	1	129157	18737	11999.3	14839.9	6401.92
G1	1	55759.2	8349.38	26423.8	198156	3497.01
G2	1	39874.8	5790.43	27913	205382	1807.17
G3	1	25672.9	4109.59	29176.3	210054	3835.86
G4	1	25818.2	4105.87	31378.3	213097	1569.83
G5	1	30795.9	5117.22	36466.4	237974	2522.1
G6	1	31197.3	4950.4	35131.6	224460	2243.44
G7	1	26958.4	4163.25	31746.9	204036	1214.73
G8	1	25731.3	4351.04	34480.4	229140	5398.92
G9	1	14482.3	2140.96	1125.13	2277.85	978.331
G10	1	26619	4175.72	31799.5	226900	1333.76
G11	1	121996	21086.9	13933.6	17866.6	7097.1
G12	1	73747.5	10190.8	8215.99	8451.07	3196.59
H1	1	64301.8	7435.42	24522.1	195504	8494.55
H2	1	32406.3	4818.28	25078.5	194441	1701.1
H3	1	27164.5	4134.61	25845.9	190938	1820.12
H4	1	28605.4	4494.42	29345.7	205548	2306.05
H5	1	31781.8	5111.22	31432.5	214154	1977.43
H6	1	29967.7	4527.71	31108.4	208628	1813.07
H7	1	34181.9	5396.01	32856.5	217351	2191.02
H8	1	68055.5	11969.9	36185.2	217414	5209.59
H9	1	19441.3	2593.36	1540.28	2620.7	985.859
H10	1	36512.9	5508.6	31335.3	226129	2135.7
H11	1	104988	15639.4	9535.37	11534.9	4660.41
H12	1	74704.4	9428.99	5112.72	7444.04	2730.54
A1	2	81554.7	11444.6	26805.8	198833	3920.48
A2	2	112552	20234.1	38579	241336	11052.2
A3	2	46212.3	7078.98	32810.6	236898	2689.89
A4	2	31003.4	4346.92	30390.3	216874	1701.52
A5	2	28864.4	4206.69	33471.8	230315	1568.77
A6	2	32350.4	5369.6	35708.6	239066	2075.32
A7	2	29997.3	4498.07	30958.9	211623	1123.85
A8	2	36803.4	4973.39	29931.6	206127	1544.27
A9	2	32131.1	4432.81	2952.77	4409.27	2007.99
A10	2	37147	5549.35	27134.6	196289	2468.06
A11	2	64328.2	8286.51	5175.73	6419.17	2492.21
A12	2	105181	13634.8	7908.79	10523.1	4066.12
B1	2	62534	8380.69	26499	203207	2643.73
B2	2	42285.6	6659.08	30914	228266	2144.27
B3	2	43431	6224.56	31749.5	220336	1930.47
B4	2	29766.9	3983.13	33720.2	230286	1326.2
B5	2	28188.3	4284.72	33314.8	218353	1471.72
B6	2	24594.1	3652.42	34584.8	227064	1359.71
B7	2	29486.3	4374.43	33238.5	216221	1229.94
B8	2	30881.9	7076.26	38757.3	230681	1360.43
B9	2	17592	2196.03	1427.34	1966.89	693.303
B10	2	25890.1	3616.88	27661.4	201316	1613.31
B11	2	77475	11225.8	6918.42	8971.64	3809.7
B12	2	78875.5	9279.66	5408.33	7040.94	2737.98
C1	2	146096	20063.9	40381.2	263728	4630.93
C2	2	44010.4	6960.02	34346.6	245884	2202.52
C3	2	30581.3	4737.63	34896.6	240151	1474.54
C4	2	70195.6	11176.5	44644.2	270921	2965.46
C5	2	23994.7	3739.83	39542.3	253398	1202.64
C6	2	25381.5	4186.19	40158.7	251967	1257.58
C7	2	86803.6	10834.3	38413.8	223965	2008.21
C8	2	41651	6775.09	37489.7	232551	2417.99
C9	2	17031.7	2233.63	1352.6	2012.7	604.775
C10	2	26777.4	3984.17	30468.3	212720	1174.72
C11	2	22391.1	2976.4	1981.72	2434.25	637.411
C12	2	35648.7	4735.64	2882.35	4099.34	1721.72
D1	2	32539.5	4550.41	28312.6	222012	1811
D2	2	33593.1	5112.25	30653.7	219981	1361.57
D3	2	33227.1	4911.42	32921	220392	1823.78
D4	2	55895	9298.79	38723.3	232831	2937.29
D5	2	21377	3544.71	34990.3	218698	1049.23
D6	2	25771.2	4282.13	36876.6	228563	1408.4
D7	2	23474.9	4013.24	35910.3	222531	952.374
D8	2	26096.4	4069.83	35876.1	224962	1311.32
D9	2	35840.8	4903.24	3126.3	3486.06	1504.47
D10	2	46859.4	8433.55	36395.2	224954	2828.47
D11	2	28541.2	3996.35	2535.33	3519.11	1428.66
D12	2	44909.9	6000.95	3608.83	4895.09	1875.97
E1	2	47472.6	6860.75	29821	227444	1757.34
E2	2	34439	5294.74	31302.6	222912	2327.57
E3	2	40271	7845.73	35910.7	220728	1833.49
E4	2	28549.2	4533.4	36773.1	235794	1385.1
E5	2	42813.5	7918.04	41487.7	240930	2197.5
E6	2	21591.8	3600.21	37352	230448	1364.98
E7	2	25437.1	4336.78	36165.9	221827	1209.38
E8	2	26750.6	4432.05	34537.5	214799	1109.35
E9	2	14302.2	1831.12	1118.31	2053.26	940.918
E10	2	26889.9	4318.25	32506.5	218638	1429.25
E11	2	131248	20434.4	12999.7	15505.6	5524.47
E12	2	99185.1	16301.9	11076.5	14863.5	6926.8
F1	2	110011	18124.6	35565.7	224821	6039.42
F2	2	27667.6	4555.39	30123.1	223342	1615.93
F3	2	24505.9	4200.64	30991	213668	1587.55
F4	2	29570.8	5180.71	33748	215254	3137.93
F5	2	71069.8	12208.7	42031	242928	3759.08
F6	2	56186.1	9883.15	38707.9	221413	3135.32
F7	2	24383.6	3577.06	36374.3	228755	1135.54
F8	2	29527.9	4728.59	34089.6	215074	1549.92
F9	2	22456.5	3094.31	2026.76	2948.04	1252.35
F10	2	32641.2	4734.6	32402.4	218631	1416.33
F11	2	29009.8	4228.08	2642.11	3298.29	1847.69
F12	2	130688	19008.6	12412.1	15384	6195.51
G1	2	55825.3	8759.7	26602.5	202153	2880.76
G2	2	41078.2	5923.14	28447.2	210697	1467.73
G3	2	26004.6	4312.99	30188.2	217155	3385.91
G4	2	26529.8	4404.34	31795.4	218104	1740.18
G5	2	30773.8	5039.26	36912.8	241854	2442.67
G6	2	32150.5	5112.92	35884.6	230810	2171.69
G7	2	27512.7	4408.14	32506.6	209438	1400.26
G8	2	26077	4287.47	35187.5	234170	5184.18
G9	2	14678.3	1910.4	1348.67	2029.92	628.775
G10	2	27408.8	4213	32634.5	233518	1775.81
G11	2	123805	21435.5	14394.4	18226.4	7693.73
G12	2	74053.3	10690.9	8179.36	8958.17	3047.76
H1	2	64584.1	7629.01	24860	200209	8241.62
H2	2	32365.3	4895.89	25844.7	200507	1687.37
H3	2	27799.5	4072.76	26599.6	197602	1936.37
H4	2	28320.1	4588.6	29792.6	209135	2509.49
H5	2	32188.8	5121.64	31999.4	217767	1773.35
H6	2	30541.9	4677.06	31793.4	215017	1774
H7	2	34731.6	5447.45	33653.8	224395	1960.49
H8	2	68202.8	11913.3	36650.9	222453	4832.1
H9	2	19673	2841.64	1739.3	2261.53	879.177
H10	2	36282.5	5599.45	31778.5	232895	1992.39
H11	2	106936	15585.5	9697.86	11930.1	4742.5
H12	2	75099.2	9461.75	5620.61	7775.75	3010.68
A1	3	80572.3	11058.3	26672.3	200489	3977.92
A2	3	110334	19697.5	38377.2	241625	10713.5
A3	3	45354.7	6917.36	32768.4	237708	2728.72
A4	3	30131.8	4110.95	30333.6	216805	1456.2
A5	3	28468.8	4151.88	33301	230566	1542.53
A6	3	32193.2	5425.86	35860.1	240702	2457.15
A7	3	30147.6	4284.14	31031	212585	1564.6
A8	3	37020.2	4939.44	29893.7	205950	1399.81
A9	3	32239.3	4378.93	2981.48	4267.61	1989.71
A10	3	37295.8	5434	27180.3	196942	2405.62
A11	3	64764.8	8120.73	5413.88	6428.83	2655.74
A12	3	105657	13755	8058.19	10683.5	4112.36
B1	3	62589.4	8109.23	26771.9	204809	2677.78
B2	3	42914.4	6605.16	30947.4	229217	2381.33
B3	3	43444.3	6085.79	31845.2	221027	1876.02
B4	3	29455.5	3830.7	33489.5	229942	1156.33
B5	3	28369.7	4129.85	33315.6	217780	1611.25
B6	3	24480.9	3484.18	34769.3	227934	1216.15
B7	3	29515.4	4426.83	33247.5	217433	1191.7
B8	3	31091.3	7099.43	38867.8	231133	1157.96
B9	3	17646.3	2229.11	1419.13	1812.79	555.782
B10	3	25570.6	3357.86	27925.5	201911	1467.6
B11	3	78080	11097.9	6877.69	8878.13	3555.91
B12	3	79477.4	9222.22	5378.97	7000.3	2887.53
C1	3	141968	19119.7	39928.4	263840	4507.73
C2	3	44146.8	6922.06	34435.6	245835	2189.98
C3	3	30540.4	4862.67	34962.5	241122	1457.81
C4	3	69755.3	10948.3	44208.6	271498	3119.5
C5	3	24167.8	3867.84	39585.5	253860	1394.17
C6	3	25628.6	4210.46	40301.3	254104	1448.58
C7	3	85509.6	10600.2	38390.4	224183	1924.03
C8	3	42000.7	6686.61	37271.1	232689	2612.95
C9	3	16976.7	2295.43	1271.68	2083.12	547.177
C10	3	27019.1	3966.06	30592.1	214052	1310.96
C11	3	22377.1	3033.97	2034.71	2717.2	1081.3
C12	3	35968.8	4672.48	2988.26	3643.57	1537.75
D1	3	32899.3	4896.05	28376.7	223427	1971
D2	3	33828.1	4985.07	30670.8	218790	1549
D3	3	33398.3	4882.39	32972.5	220949	2038.79
D4	3	55375.2	9094.9	38502.6	232526	3119
D5	3	21551	3308.99	34955.6	219490	1164.06
D6	3	26044.7	4327.82	36977.2	229596	1694.64
D7	3	24426.4	4052.03	35885.6	222848	1437.11
D8	3	26342	4271.63	35886.1	226085	1395.95
D9	3	36874.8	5134.39	3160.58	3769.62	1176.13
D10	3	45710.3	8155.47	36356.4	225309	2989.23
D11	3	28958.6	4340.03	2517.74	3258.59	1213.06
D12	3	44461.5	6269.07	3689.78	4616.42	1805.58
E1	3	47049.9	6728.63	29881.1	228800	2358.92
E2	3	34599.1	5316.43	31554.6	223566	2744.82
E3	3	40503.6	7870.35	36017.4	222223	1998.74
E4	3	28629	4828.29	36709.7	236609	1683.03
E5	3	43186.5	7701.55	41650.6	242781	1916.9
E6	3	21981.1	3820.71	37569.4	232528	1464.46
E7	3	25395.1	4313.58	36236.7	222980	1038.68
E8	3	26635.7	4538.92	34723.2	216607	1008.97
E9	3	14369.1	2014.77	1295.69	2106.51	514.198
E10	3	27141.6	4159.58	32536.6	220018	1769.9
E11	3	132459	20351.3	13031.9	15413.6	5453.6
E12	3	99668.7	16514.4	10964.1	14920.4	6593.52
F1	3	107650	17676.1	35582.4	225570	5968.64
F2	3	28766.6	4569.63	30278.1	223603	1976.4
F3	3	24425.6	4039.59	30946.4	214905	1856.87
F4	3	29370.1	5544.89	33581.3	215823	2693.02
F5	3	70125	11673.3	42036.6	243198	3353.4
F6	3	55851.3	10007.4	38581	222762	2921.35
F7	3	24639.9	3744.48	36525.1	229814	1039.04
F8	3	28985.7	4624.77	34177.3	215702	1630.3
F9	3	22906.4	3066.46	2023.28	3178.41	1276.63
F10	3	33698	5111	32630.9	219964	1203.49
F11	3	29219.5	4145.45	2602.77	3906.32	1644.02
F12	3	131828	19333.6	12312.7	15675.2	6234.62
G1	3	55880.8	8627.54	26809.5	204343	2909.01
G2	3	41398.2	6031.38	28614.5	212716	1710.36
G3	3	26894	4162.41	30430.3	218073	3413.83
G4	3	26251.8	4553.02	32057.4	219000	1480.34
G5	3	31079.9	5341.35	36757.9	242985	2363.24
G6	3	32463.8	4939.56	36305.7	232184	1991.81
G7	3	27686.3	4449.77	32596.8	210926	1161.02
G8	3	26056	4530.08	35584.7	235482	5424.06
G9	3	15028.1	1916.99	1269.9	2044.69	870.693
G10	3	27486.7	4390.33	32688.6	235060	1592.25
G11	3	124914	21970.3	14474.2	18457.5	6988.28
G12	3	74609.9	10625.7	8492.35	8691.9	3311.6
H1	3	64365.3	6925.64	25278.1	202205	8956.87
H2	3	32715.6	4839.91	25888.7	202541	1881.85
H3	3	27797.3	4182.46	26860.1	200369	1485.38
H4	3	28270.5	4826.14	29952	209740	2284.32
H5	3	31964.3	5201.93	31941.9	219167	2136.26
H6	3	30516.1	4528.65	32054.3	217111	1495.85
H7	3	34850.9	5424.7	33756.4	226194	2089.32
H8	3	67733.3	11733.2	36814.7	224347	4994.9
H9	3	19808.2	2856.72	1610.08	2394.45	1363.06
H10	3	35858.9	5569.55	31948.9	234946	2102.3
H11	3	107410	15771.5	9714.22	11937.2	5233.89
H12	3	75756.2	9515.2	5535.96	7969.13	2876.91
A1	4	79814.5	11117.5	26676.3	200677	4195.65
A2	4	109907	19770.6	38416.2	242133	11212.2
A3	4	44626.4	6757.7	32766.5	237929	2601.25
A4	4	30295.6	4023.43	30167.8	216639	1416.04
A5	4	28225.2	4132.66	33244.9	230333	1757.58
A6	4	32118.6	5330.49	35860.1	241223	2147.44
A7	4	30105.9	4447.3	30923.9	212511	1424.3
A8	4	37453.1	4956.07	29841.3	206441	1490.82
A9	4	32556.9	4394.22	3102.37	4506.28	1864.78
A10	4	36920	5444.81	27185.8	196705	2214.64
A11	4	64610.4	8049.84	5097.74	6564.09	2197.01
A12	4	105832	13658.4	7983.49	10898.6	4299.59
B1	4	61907.4	8491.13	26788.1	204405	2646.25
B2	4	42510.4	6655.77	31170	228811	2190.39
B3	4	43394.4	6066.49	31889.8	221009	1854.8
B4	4	29170.4	4046.18	33364.7	229569	1082.47
B5	4	28236.5	4179.98	33151.7	217569	1700.11
B6	4	24605.1	3651.7	34823.9	227745	935.789
B7	4	29989.1	4484.63	33287.5	216751	1087.58
B8	4	31531.5	7125.9	38592.1	231330	1257.04
B9	4	17656.7	2204.69	1529.12	2177.33	773.863
B10	4	25758.5	3744.67	27769.7	201962	1230.61
B11	4	78419.3	11346.3	6996.19	9058.46	3596.48
B12	4	79431.3	9206.76	5440.95	6900.94	2657.45
C1	4	137636	18497	39580.7	263254	4454.38
C2	4	44143	6638.54	34304.9	245577	2169.47
C3	4	30392	4846.92	34862.8	240652	1400.16
C4	4	68675.9	10540.9	44115.6	270612	3192.37
C5	4	24241.6	4013.91	39493.2	252804	1409.79
C6	4	25490.7	4102.98	40215.6	253689	1472.64
C7	4	85098.7	10651.5	38158.1	223527	2050.31
C8	4	41644.4	6781.58	37231.7	231822	2448.37
C9	4	16904.7	2004.09	1382.02	2479.07	424.783
C10	4	26981.8	4055.69	30500.6	213861	833.675
C11	4	22474.8	3073.84	2052.37	3001.27	1103.17
C12	4	35824.2	4867.11	2935.31	3802.38	1951.37
D1	4	33117.3	5000.24	28310.2	223082	1734.63
D2	4	33711.2	5054.89	30531	218469	1466.77
D3	4	33287.6	4779.18	32979.1	221060	1523.42
D4	4	54432.1	8920	38241.1	231991	2987.88
D5	4	21209.5	3421.11	34625	218170	1012.18
D6	4	25880	4386.67	37072.9	228907	1533.99
D7	4	24902.4	3920.92	35757.7	222365	986.591
D8	4	26708	4250.85	35873.3	224822	1085.94
D9	4	37120.6	5081.56	3256.56	3789.73	1283.05
D10	4	44700.7	7957.1	35888.5	224832	2993.69
D11	4	29061.3	4210.05	2475.96	3545.6	1592
D12	4	44735.7	5973.65	3663.42	4849.93	2016.74
E1	4	46676.6	6645.62	29934.5	229451	1784.43
E2	4	34700.3	5042.96	31258.6	223598	2382.26
E3	4	39923.6	7715.9	35947	221579	1771.66
E4	4	28500.3	4718.26	36791.3	235903	2227.18
E5	4	42950.2	7984.01	41436.3	241892	2176
E6	4	22079.3	3933.67	37415.6	231817	1665.34
E7	4	25740.2	4250.49	36314.2	222762	1352.11
E8	4	26878	4169.92	34788.2	216826	1303.9
E9	4	14569.6	1558.33	1168.99	2107.58	713.689
E10	4	27454.7	4119.11	32606.2	219890	1813.65
E11	4	133068	20526.3	13043.7	15667.3	5742.36
E12	4	99882.3	16409.6	10987.4	15164.2	6477.44
F1	4	105698	17209.4	35199.9	225144	5377.96
F2	4	28452.4	4507.48	30320.3	223711	1666.89
F3	4	24413.3	3854.27	31097.7	214917	1578.83
F4	4	28946.7	5198.47	33698.8	214360	2740.09
F5	4	68963	11602.6	41741.9	241933	3576.12
F6	4	55440.8	9719.65	38387.3	221158	3040.87
F7	4	24934.7	3858.29	36485.7	228524	1165.75
F8	4	29174.1	4672.93	34024.6	215201	1302.28
F9	4	22741.3	2891.27	2094.05	2719.95	1063.86
F10	4	32866.5	4787.87	32433.3	220314	1662.01
F11	4	29381.4	4102.23	2596.62	3590.68	2230.65
F12	4	131988	19411.4	12545	15658.7	6443.2
G1	4	56676.6	8430.83	26639	205321	3149.86
G2	4	44087.9	6166.67	28784.2	213173	1601.59
G3	4	26884.6	4299.51	30381.2	218308	3595.32
G4	4	26509.7	4028.77	32090.6	219141	1949.35
G5	4	31174.3	5134.54	36672.5	242275	2262.06
G6	4	32493.4	5396.58	36069.1	231785	1730.08
G7	4	27936.3	4407.18	32634.2	209762	1355.34
G8	4	26596	4477.11	35274.9	235999	5470.15
G9	4	14696.4	1999.33	1347.61	2301.06	776.91
G10	4	27366.6	4510.05	32982.8	235593	1728.02
G11	4	125320	21809.2	14663.5	18764.8	7436.07
G12	4	74645.3	10872.1	8405.78	8808.92	3047.76
H1	4	64408.1	8004.9	25777.9	202934	8750.3
H2	4	32958.5	4744.48	26147.9	203137	2168.99
H3	4	28090.4	4192.96	27282.8	201614	1525.2
H4	4	28119.8	4455.7	29805.3	210359	2183.59
H5	4	32445.2	5121.64	32009.3	219332	2293.09
H6	4	30272.7	4784.15	32235.5	218226	1331.2
H7	4	34723.6	5464.27	33706.1	227129	2011.83
H8	4	67143.2	11698	36811.2	225556	4832.1
H9	4	20035.3	2640.61	1724.21	2490.61	721.058
H10	4	35717	5645.45	32065.1	236028	1823.21
H11	4	107928	15801	9856.84	11708.8	5118.48
H12	4	75663.8	9556.58	5485.17	8140.49	3356.92
A1	5	78988.8	11092.2	26521.6	199421	4315.87
A2	5	108347	19585.4	37971.3	240511	10679.6
A3	5	44255.2	6781.36	32452.9	236390	2893.05
A4	5	29624.3	4022.57	30101.5	215749	1648.27
A5	5	27796.9	4041.55	33069.6	229799	1901.91
A6	5	32145.8	5342.84	35722.2	240249	2040.67
A7	5	30006.8	4343.72	30976	212355	1396.66
A8	5	37194	4882.65	29782.3	205829	1629.5
A9	5	32511.4	4409.51	2992.81	4498.58	2083.41
A10	5	36501.4	5309.64	27204.1	196817	2255.04
A11	5	65078.6	8069.65	5051.98	6186.23	2325.5
A12	5	105914	13609	8128.68	11007.7	4569.16
B1	5	61473.2	8330.12	26557.9	203496	2375.07
B2	5	42435.1	6801.02	30714	228483	2409.22
B3	5	43027.7	6490.16	31920.5	220108	1712.69
B4	5	28842.5	3789.2	33351.5	228444	1206.39
B5	5	28035.5	4052.05	33093.3	216505	1395.32
B6	5	24495	3673.99	34677.4	227832	1035.76
B7	5	30061.6	4572.49	33128.4	216265	1159.98
B8	5	31572.8	6968.72	38547.8	230697	1475.88
B9	5	17991.4	2102.3	1483.97	2067.97	418.26
B10	5	25758.5	3614.31	27871.8	201838	1180.58
B11	5	78661.6	11793.5	7003.59	9023.16	3387.97
B12	5	79046.2	9418.84	5422.46	7092.88	2739.13
C1	5	134173	18136	38868.8	261797	4630.93
C2	5	44211.8	6884.1	34300.3	245107	2438.38
C3	5	30863.9	4562.57	34710.3	239768	1479.19
C4	5	67844.3	10480.3	44127.7	269695	2708.12
C5	5	24371.1	3984.86	39123.8	251564	1422.94
C6	5	25674.8	4127.25	40156.5	253159	1486.49
C7	5	83901.5	10488.6	38009.2	222854	1808.46
C8	5	41588.4	6756.42	37020.9	231237	1818.77
C9	5	16868.6	2297.2	1467.54	2148.96	546.278
C10	5	27371.9	4056.59	30522.8	213633	1036.68
C11	5	22341.1	2929.89	1951.91	2619.52	1435.54
C12	5	35525.1	4605.45	2862.17	3966.35	1091.14
D1	5	33101.3	4998.97	28396.1	222534	1924.94
D2	5	33831.9	5128.46	30518.7	218753	1795.68
D3	5	33353.4	4942.6	32858.4	220297	1903.74
D4	5	54094.7	9049.93	38133.4	231112	3279.03
D5	5	21507.1	3444.06	34584.7	217208	1146.46
D6	5	26392.3	4340.21	36863.4	228273	1803.11
D7	5	23961.1	3858.08	35766.8	221342	1188.63
D8	5	26952.8	4537.53	35560.4	224725	1330.03
D9	5	37197.9	5172.13	3284.97	4214.11	1453.37
D10	5	43531.1	7506.33	35663.5	224422	2740.95
D11	5	28785.3	4188.02	2269.26	3393.27	1093.28
D12	5	44872.8	5899.56	3780.14	4677.92	1883.48
E1	5	46073.2	6553.25	29635.2	228617	2055.31
E2	5	34477.9	5352.57	31263.3	222993	2460.71
E3	5	40394	7859.16	35876.6	222088	2027.97
E4	5	28577.1	4853.6	36530.7	234823	1603.21
E5	5	42303.9	7740.73	41353.8	240680	2234.06
E6	5	21977.1	3690.58	37144.1	231108	1335.33
E7	5	25554.9	4335.85	36119.4	221998	750.317
E8	5	26837.6	4265.69	34408.5	215956	1238.7
E9	5	14169.5	1907.37	1115	2012.79	534.467
E10	5	27465.9	4201.11	32484	220376	1826.15
E11	5	133552	20759.3	13144.5	15460.7	5377.45
E12	5	99974.2	16457.1	11163.8	14982.1	6938.97
F1	5	104491	17543.4	35134.4	225020	5565.84
F2	5	28804.1	4662.86	30185.1	224266	1697.97
F3	5	25113.1	4064.96	31022.6	214546	1775.09
F4	5	29158.4	5066.34	33362.2	213609	2736.72
F5	5	66710.1	11375.2	41425	241332	3534.08
F6	5	54877.4	9884.06	38226.5	221165	2803.77
F7	5	24874.6	3913.79	36271.4	227998	1325.61
F8	5	29241	4775.68	33877.3	214547	1640.07
F9	5	23111.8	3053.7	2047.65	2974.27	1506.75
F10	5	33138.6	4676.69	32315.6	220061	1074.42
F11	5	29586.2	4272.57	2506.87	3528.29	1686.71
F12	5	132672	19441.6	12223	15593.9	6653.96
G1	5	56250.2	8675.18	26750	204988	3295.18
G2	5	44698.3	6269.74	28677.4	212778	1501.2
G3	5	27007.1	4271.41	30433.5	217595	3614.65
G4	5	26671.3	4265.57	31922.7	218503	1850.16
G5	5	31248.4	5020.85	36530.5	241651	2402.41
G6	5	32852.9	5051.85	36033.8	231541	1696.73
G7	5	28396.9	4501.07	32474	209920	1349.48
G8	5	26812.2	4444.27	35439.1	236247	4960.01
G9	5	15102.5	2079.48	1209.23	2257.81	766.253
G10	5	27925.8	4298.84	32695.1	235270	1481.47
G11	5	125973	22181.6	14744.4	18475	7835.07
G12	5	74503.9	10806.9	8595.57	8924.25	2882.01
H1	5	64266.9	8185.58	25945.5	203374	7138.52
H2	5	32876.3	4810.64	25963.1	203775	1721.69
H3	5	28207.6	4373.84	27192.1	201883	2012.79
H4	5	28133.1	4402.33	29718.3	210245	2564.8
H5	5	31989.5	5114.35	32033.1	219449	1966.37
H6	5	30411.4	4567.16	32086.9	218018	1766.56
H7	5	34843.8	5410.85	33823.9	227064	2032.17
H8	5	65967.4	11250.6	36707.6	225048	4713.14
H9	5	20076.7	2799.43	1697.8	2558.48	1017.29
H10	5	35988	5548.85	32207.8	237363	2029.03
H11	5	108461	16556.4	9911.78	12047.2	5081.59
H12	5	76275.3	9560.02	5728.34	7774.18	2746.28
A1	6	78279.8	11089.3	26565.2	199543	4167.6
A2	6	108108	19366.1	37884.1	240216	10547.7
A3	6	43777.1	6587.21	32418.6	236207	2612.21
A4	6	29501.3	4160.72	30100.6	215066	1869.14
A5	6	27998.5	3981.05	32947.6	229566	1824.64
A6	6	31628.4	5169.94	35624.6	239903	1943.09
A7	6	30408.8	4319.34	30878.2	211842	1390.28
A8	6	37107.9	4982.39	29616.4	205411	1500.93
A9	6	32519.1	4368	2945.21	4154.43	1934.87
A10	6	36831.2	5419.58	27054.1	196605	1761.06
A11	6	64886.3	8005.01	5147.65	6545.84	2358.41
A12	6	106010	13771.1	8084.49	10925.3	4260.12
B1	6	61387	8258.26	26383.9	203417	2049.65
B2	6	42769.8	6637.07	30777.4	228109	2229.01
B3	6	43180.5	6109.69	31687.2	220265	1827.12
B4	6	28655.8	3793.99	33085.3	227967	1239.21
B5	6	27801.8	4152.3	32825.3	216000	1546.55
B6	6	24553.2	3609.28	34547.6	227105	1376.25
B7	6	30022.4	4328.18	32961.9	215803	1245.39
B8	6	31902.6	7173.88	38479.1	230365	1579.27
B9	6	18172.5	2333.87	1515.98	2345.52	644.479
B10	6	26183.3	3558.56	27857.7	201920	1451.8
B11	6	79137.8	11308.6	7173.01	9217.8	3660.63
B12	6	79798.8	9386.81	5489.88	7300.63	3127.96
C1	6	131738	17715	38836.7	261257	4378.17
C2	6	44145.5	7120.17	34240.2	244706	2199.1
C3	6	30857.2	4543.12	34584.3	239112	1767.41
C4	6	67754.5	10509.7	43841.9	269347	3147.17
C5	6	23916.1	3899.25	39010.6	250618	1336.63
C6	6	25754.6	4241.66	40223.7	252132	1248.83
C7	6	83528.2	10520.1	38037.3	222459	1747.24
C8	6	41683.9	6619.23	37044	230336	2157.2
C9	6	17010.1	2040.29	1289.15	2202.91	591.276
C10	6	27413.9	4271.14	30488.6	213505	1154.87
C11	6	22026.1	3080.48	1958.53	2773.34	993.837
C12	6	35339.7	4705.99	2843.26	3988.3	1665.9
D1	6	32980.9	4888.42	28171.2	222487	1459.46
D2	6	34224.1	5355.39	30134.6	217370	1723.12
D3	6	33223.9	4734.02	32681.8	219947	1626.06
D4	6	54025.7	8872.03	38117.7	229644	2763.84
D5	6	21691.1	3482.91	34521.1	216544	1108.49
D6	6	26522.2	4309.24	36730.6	227457	1461.41
D7	6	24192.7	3876.7	35413	221004	972.741
D8	6	26700.6	4470.84	35588.8	224103	1322.9
D9	6	37626.6	5113.63	3173.31	3510.01	1228.17
D10	6	42895	7438.14	35559.7	224216	2449.79
D11	6	28897.9	4063.54	2339.63	3438.52	1166.23
D12	6	44547.1	5861.53	3788.61	4664.47	2340.5
E1	6	45885.4	6840.87	29519.5	228110	1731.38
E2	6	34932.1	5430.88	31186.1	222137	2923.14
E3	6	40516.1	7990.11	35858.4	220891	2220.2
E4	6	28785.6	4503.69	36495.5	233993	1530.13
E5	6	42047.3	7709.8	40969	240167	1887.88
E6	6	22314.2	3748.41	37088.1	230325	1423.33
E7	6	25533.5	4277.39	36010.8	221342	840.008
E8	6	26900.4	4627.64	34447.3	215036	921.008
E9	6	14420.2	1652.84	1290.18	1779.56	601.675
E10	6	28191.3	4516.33	32592.3	219730	1091.73
E11	6	133606	20526.3	13248.5	15705.8	5824.86
E12	6	100267	16527	11255.8	15096.9	7022.29
F1	6	104077	17210.8	35179.4	225090	5731.85
F2	6	28697.7	4535.96	29978.1	222487	1715.37
F3	6	24626.3	4252.49	30913.7	214155	1615.9
F4	6	28837.8	5119.64	33258.2	213222	3083.02
F5	6	65953.7	10898.5	41066.9	240570	3038.63
F6	6	54473.3	9523.26	38080.8	219839	2669.8
F7	6	25222	3792.45	36273.3	227203	1130.66
F8	6	29106.2	4686.84	33824.2	214194	1413.07
F9	6	23340.5	3202.21	1990.8	3154.46	884.623
F10	6	32873	4826.09	32269.9	220028	1657.48
F11	6	29468.4	4365.37	2635.96	3298.29	1685.49
F12	6	132916	19701.6	12502.9	15656.5	6533.37
G1	6	56242.5	8627.54	26693.1	204923	3319.4
G2	6	42894.4	6061.01	28758.1	212471	1586.06
G3	6	27742.7	4538.87	30361	217305	3040.13
G4	6	26794.8	4272.18	31982.5	217723	1625.9
G5	6	31575.7	5093.4	36516.6	240812	2260.97
G6	6	32917.4	5261.65	35989.6	231181	1875.6
G7	6	28587.7	4421.7	32403	209457	1196.18
G8	6	26780.8	4280.06	35452.7	235719	4999.81
G9	6	14862.3	1841.23	1163.45	1833.68	631.972
G10	6	28133.3	4625.26	32848.7	234730	1668.28
G11	6	126244	22138	14601.2	19199.6	8077.73
G12	6	74857.3	10678.2	8307.55	8262.81	2575.88
H1	6	63237.7	8022.64	25845.8	204398	8590.11
H2	6	33196.5	4880.62	25730.9	203342	1944.77
H3	6	28182.6	4054.09	27170.7	201993	1952.52
H4	6	28026.3	4460.93	29612.7	209977	2150.01
H5	6	32718.3	5330.18	31935	218669	1616.52
H6	6	30167.2	4507.04	32157.6	218187	1501.43
H7	6	34715.7	5417.77	33710.8	226549	2040.89
H8	6	65458.6	11091.8	36395.1	225425	4787.38
H9	6	19582.9	2480.78	1667.62	2502.86	1179.22
H10	6	35472.7	5509.75	32234.5	237119	1724.08
H11	6	108686	16140.9	10041.5	11938.4	5464.71
H12	6	75610	9515.2	5812.99	8151.49	2749.43
A1	7	77887.9	10803.1	26339.2	198510	4086.12
A2	7	106914	19347.2	37604.4	239875	10655.1
A3	7	43942.7	6595.09	32440.1	235610	2784.49
A4	7	29640.6	3976.24	29734.2	214700	1448.35
A5	7	28113.5	3976.07	32991.2	228995	1737.16
A6	7	31585	5259.82	35675.6	239919	2081.68
A7	7	30330.9	4544.11	30666.9	211263	1424.3
A8	7	37334.5	4908.27	29591.6	205369	1539.94
A9	7	32207.5	4513.65	3179.44	4283.78	2046.08
A10	7	36580.6	5466.44	26973.6	196734	2065.9
A11	7	64421.8	8000.84	5121.66	6502.9	2654.68
A12	7	106852	13770	8156.03	11175.9	4386.44
B1	7	61351.6	7941.56	26489	202822	2907.34
B2	7	42815.5	6929.75	30695.7	227247	2392.05
B3	7	43146.9	6343.12	31642.6	219310	1769.9
B4	7	28409.9	3838.68	33003.5	227141	1426.33
B5	7	28048.6	4305.67	32919.9	215960	1497.44
B6	7	24757.6	3499.28	34491.4	226820	1227.42
B7	7	30177.3	4570.95	33043.5	215524	1016.81
B8	7	32278.1	7122.59	38341.7	229874	1105.41
B9	7	18006.9	2210.21	1512.7	1935.41	642.038
B10	7	25902.3	3814.15	27652.6	200976	1191.11
B11	7	78785.2	11534.9	7176.72	9229.25	3274.76
B12	7	79791.4	9382.39	5557.29	7070.3	2809.3
C1	7	129882	17381.2	38685.3	260394	4047.94
C2	7	44241.8	6847.32	34087.5	243933	2377.99
C3	7	30978.1	4803.39	34719.7	238556	1855.73
C4	7	66893	10391.1	43771.2	268323	2576.22
C5	7	24363.1	3668.36	38727.8	249641	1363.76
C6	7	25842.8	4156.37	39841.1	251298	1143.12
C7	7	82988.2	10340.3	37714.6	221492	1702.08
C8	7	41494.6	6547.79	36738.1	229776	2066.05
C9	7	16929	2239.81	1221.11	1956.01	682.172
C10	7	27346.7	4301.92	30449.8	213519	1227.96
C11	7	22549.2	2855.7	1934.24	2657.69	867.011
C12	7	35864.9	4400.51	2821.83	3894.05	1622.76
D1	7	33628.3	5002.79	27949.9	221435	1963.73
D2	7	34148.6	4897.78	30275.7	216395	1477.65
D3	7	33543.5	4846.91	32715.8	218862	1925.34
D4	7	53661.8	8691.13	37816.5	229527	2998.21
D5	7	21783.2	3572.96	34146.4	215779	1001.07
D6	7	26509.8	4335.56	36371	226269	1434.49
D7	7	25116.6	4107.12	35468.3	220137	1100.65
D8	7	26466.5	4389.43	35503.7	223663	1297.96
D9	7	37461	5159.86	3147.85	3896.07	1355.91
D10	7	42042.1	7339.84	35264.3	224051	2469.44
D11	7	28617.4	3823.41	2558.42	3189.05	1120.5
D12	7	45078.9	6120.87	3540.12	4553.96	1821.54
E1	7	45753.9	6683.03	29478.3	227131	1481.94
E2	7	35076.9	5057.41	31013.7	221820	2649.72
E3	7	40560.9	7684.56	35600.6	221001	1984.12
E4	7	28788.6	4545.5	36262.1	233208	1831.44
E5	7	42027.9	7583.01	40883.3	239322	1982.48
E6	7	22634.4	3786.37	37013.1	229523	1427.16
E7	7	25592	4180.9	35841.1	220977	1060.86
E8	7	27000	4471.37	34227.1	215010	1294.58
E9	7	15163.3	1867.63	1239.5	1701.82	282.702
E10	7	27718.6	4296.95	32503.3	219575	1130.28
E11	7	133660	20783.3	13162.7	15623.4	5524.47
E12	7	100845	16553.2	11156.4	14765.9	7005.44
F1	7	103519	17421.8	34966.3	225138	5577.42
F2	7	28943.1	4677.11	29867.7	221260	1376.02
F3	7	25347.7	3996.57	30783.1	213160	1726.02
F4	7	28924.7	5114.09	32913.7	212136	3106.55
F5	7	65118.5	10926.8	41061.3	239557	3395.44
F6	7	54461.3	9560.71	37931.3	219417	2542.57
F7	7	25119.3	3884.63	36114.8	226558	1435.75
F8	7	28951.3	4732.87	33602.2	213444	1375.05
F9	7	22613.2	3240.49	1857.38	3411.06	1724.15
F10	7	33268.1	4757.76	32299.6	220469	1465.02
F11	7	29984.7	4167.06	2692.52	3507.49	2001.36
F12	7	133407	19586.6	12499.6	15819.2	7108.05
G1	7	56434.9	8344.77	26613.3	204784	3379.95
G2	7	44867.5	6472.04	28506.5	212712	1596.81
G3	7	27971.9	4441.1	30204.2	217321	3307.52
G4	7	26885.1	4243.54	31662.8	217844	1324.01
G5	7	31412	5220.08	36362.9	239865	2509.04
G6	7	33000.9	5083.37	35824.7	231256	1924.11
G7	7	28874.7	4446.86	32380	208507	1499.86
G8	7	27200.7	4529.02	35156.3	235824	5296.26
G9	7	15225.1	1825.86	1278.42	1960.28	1136.06
G10	7	28638.8	4471.65	32685.3	234929	1504.28
G11	7	126767	22182.9	14765.6	18844.8	7682.48
G12	7	75042.9	11040.6	8394.12	8739.38	2863.4
H1	7	63843.5	7046.63	25231	204934	8661.78
H2	7	33225.5	5033.3	25937.1	203474	2110.64
H3	7	28522.4	4417.02	27002	201589	1345.45
H4	7	28511.9	4307.11	29673.3	209345	2034.46
H5	7	32770.7	5150.84	31764.5	218552	1925.15
H6	7	30497.8	4570.92	32058.9	217775	1702.37
H7	7	34733.3	5283.22	33662.4	226772	2045.73
H8	7	64432.5	10961.9	36411.9	225053	4465.36
H9	7	19850.5	2613.47	1485.57	2616.93	1125.88
H10	7	35758.6	5517.8	31979.8	236994	1949.29
H11	7	108968	15951.1	9771.5	12178.6	5048.28
H12	7	75695.7	9597.95	5577.52	7904.67	3079.93
A1	8	77851.3	10884.9	26187.2	198709	3813.62
A2	8	106740	18945	37427.8	238480	10390
A3	8	43845.2	6581.3	32290.2	235275	2679.93
A4	8	29553.1	4129.83	29701.1	214079	1397.71
A5	8	27933.8	3857.91	32920.3	228637	1461.61
A6	8	31903.5	5211.1	35480.2	239127	1951.58
A7	8	30239.7	4319.34	30596.3	211341	1142.98
A8	8	37029.1	4979.62	29587.3	205077	1857.02
A9	8	32638.4	4420.44	3153.75	4579.42	2083.41
A10	8	36667.4	5530.43	27026.7	196172	2272.49
A11	8	65066	8141.59	5131.01	6624.2	2573.97
A12	8	106753	13567.1	8176.02	10870.7	4125.9
B1	8	60940.5	8157.13	26480.3	202208	2274.16
B2	8	42789.6	6391.7	30763.5	226841	2160.36
B3	8	43347.5	6058.22	31603.6	218857	1607.49
B4	8	28123	3888.96	32727.4	226369	1144.02
B5	8	28341.9	4072.25	32888.4	215191	1343.88
B6	8	24871.5	3565.42	34379.8	226054	1231.93
B7	8	29956.7	4432.23	32904	215045	1052.6
B8	8	32038.2	7063.85	38407.8	229245	1222.58
B9	8	17945.7	2379.56	1372.35	2161.59	609.488
B10	8	26050.8	3616.88	27688.7	201147	1527.29
B11	8	79345.3	11478.8	7026.74	9150.06	3551.19
B12	8	80041.8	9109.55	5446.39	6858.03	2838.06
C1	8	128295	17426.1	38167.1	259696	4102.55
C2	8	44573.3	6931.55	33831.9	243479	1905.13
C3	8	31279.7	4623.7	34493	237901	1502.43
C4	8	66822.1	10209.3	43537.6	267906	2955.32
C5	8	24444.1	3742.97	38633.7	248726	1487.88
C6	8	26040.2	3991.34	39861.8	250638	1331.21
C7	8	83143.1	10415.9	37632	220931	1699.02
C8	8	41658.4	6535.62	36842.6	229478	1969.84
C9	8	17395.6	2186.84	1296.51	1998.07	544.478
C10	8	27617.3	4329.08	30472.9	213110	1181.04
C11	8	22276	3164.64	2067.83	2966.46	1068.18
C12	8	35328.5	4552.61	2836.96	3621.62	1887.93
D1	8	33783.4	5127.31	27879.8	220646	1883.73
D2	8	34374.9	5028.71	29983.7	216192	1746.1
D3	8	33487.1	4746.92	32467.9	218805	1878.89
D4	8	53798.9	8436.27	37952.5	229175	3126.23
D5	8	21964.7	3389.33	34207.3	215298	897.353
D6	8	26694.1	4291.43	36335.5	225491	1423.08
D7	8	24095.7	3823.95	35408.9	219678	830.17
D8	8	27019.2	4312.34	35304.2	223307	1461.88
D9	8	37780.5	5092.88	3369.2	4087.66	1405.11
D10	8	41333.7	7203.45	34963.5	223375	2573.93
D11	8	28683.7	4234.28	2455.07	3521.31	1086.74
D12	8	44743.9	6013.63	3794.26	4905.67	1841.24
E1	8	45280.8	6366.19	29483.8	226841	1413.09
E2	8	35209.9	5545.33	30831.8	220865	2873.21
E3	8	40378.4	7992.35	35508.5	219808	1880.7
E4	8	28568.2	4746.87	35876.9	232150	1706.64
E5	8	42051	7804.64	40569.3	238341	2397.47
E6	8	22559.6	3936.38	37180.2	229589	1430.99
E7	8	25513.7	4222.65	35989.5	220664	991.422
E8	8	27341.8	4481.45	34237.5	214023	1064.85
E9	8	14484.1	1667.88	1193.23	2045.81	769.163
E10	8	27955	4073.32	32336.1	219727	1437.59
E11	8	134242	20661.9	13181	15528.1	5359.47
E12	8	100730	16547.3	11077.5	15153.8	7017.61
F1	8	102998	17140.9	34814.8	223108	5139.88
F2	8	28801.6	4497.12	29585	220709	1637.06
F3	8	25434.2	4094.74	30702.6	212703	1779.45
F4	8	28900.7	5091.88	33046.8	211080	2754.66
F5	8	64333.2	10921.4	40877.9	239065	3239.76
F6	8	54240.7	9780.85	37897.5	219058	2963.76
F7	8	25140.1	3938.24	35813	225745	1130.66
F8	8	29279.3	4619.41	33626.1	213009	1686.78
F9	8	22868.3	2955.08	1986.16	2770.13	1283.57
F10	8	33160.3	4587.51	32423	219749	1529.55
F11	8	29773.8	4018.33	2720.79	3386.37	2020.88
F12	8	133672	19689.9	12477	15832.4	6870.14
G1	8	56585.8	8596.8	26514.5	204137	3413.58
G2	8	44994.8	6299.38	28487.5	211771	1898.01
G3	8	28505.5	4651.24	30237.3	216363	3767.14
G4	8	26856	4392.22	31516.3	217141	2032.37
G5	8	31832.7	5064.16	36243.3	239385	2406.77
G6	8	33350.9	5189.74	35768.7	230321	1607.8
G7	8	29311.2	4751.77	32368.5	209056	1388.54
G8	8	27466.4	4442.15	35221.8	234996	5067.9
G9	8	15366.8	2002.62	1267.77	1982.44	1268.21
G10	8	28567.2	4519.09	32727.5	234753	1365.25
G11	8	127045	22181.6	14765.6	18859.8	7604.92
G12	8	74816.7	10542.3	8410.77	9137.94	3529.78
H1	8	63275.8	6995.01	25063.5	203373	8289.39
H2	8	33044.3	4762.29	25949.5	202769	2082.04
H3	8	28368.2	3981.74	26947.6	201659	1631.76
H4	8	27965.2	4532.09	29485.5	209405	2393.94
H5	8	31664.9	5173.78	31730.8	218042	1879.91
H6	8	30569.3	4618.82	32047.1	217621	1600.97
H7	8	34486.8	5257.5	33613.9	226417	1885.91
H8	8	63477.6	10920.1	36079.9	224948	4437.63
H9	8	19942.4	2793.4	1612.91	2449.13	613.424
H10	8	35792.8	5322.29	31958.5	236934	1935.28
H11	8	108938	16271.7	9860.35	12109.9	4989.98
H12	8	75967.9	9708.29	5771.44	7528.93	2744.71
A1	9	77358.3	10790.4	26195.2	198445	3594.56
A2	9	106124	19229.3	37363.6	238813	10349.1
A3	9	43820.5	6356.6	32003.1	234894	2824.33
A4	9	29503.3	4033.73	29770.9	213482	1653.51
A5	9	27909.5	3944.04	32794.6	228036	1533.05
A6	9	31550.5	5197.38	35419.2	238861	2122.7
A7	9	30101.2	4253.67	30619.8	210647	1383.2
A8	9	36945.5	5089.06	29457	204958	1389.7
A9	9	32474.5	4518.02	3040.41	4269.92	2156.54
A10	9	36824.7	5274.5	26904.1	195966	2392.77
A11	9	64859.7	7968.52	5114.38	6054.2	2410.44
A12	9	106734	13627.3	8221.27	10904.1	4424.79
B1	9	61140.6	8279.55	26507.8	203030	2615.98
B2	9	42541.3	6518.24	30442.9	226184	2305.17
B3	9	43046.1	6423.07	31406.6	218649	1941.54
B4	9	28290.4	3818.73	32769.6	225660	1328.67
B5	9	28320.7	4037.83	32686.6	214831	1509.13
B6	9	24917.1	3703.47	34302.4	225870	1015.46
B7	9	30253.9	4230.31	32856.7	214213	1180.32
B8	9	32143.3	7109.35	38391.2	228746	1304.43
B9	9	18246.7	2301.58	1506.96	2152.48	476.036
B10	9	25836.5	3784.99	27553.2	201004	1398.26
B11	9	79562	11661.9	7125.8	9195.86	3653.08
B12	9	80094.1	9435.41	5490.97	7376.28	2869.12
C1	9	126132	16980.6	38091.4	258577	4091.12
C2	9	44396.9	7053.74	33884	243072	2669.68
C3	9	31523.2	4825.62	34246.5	237503	1518.24
C4	9	66243.9	10427.7	43348.7	266754	2780.98
C5	9	24683.9	3846.63	38516.4	248014	1371.98
C6	9	26094.8	4186.88	39489.5	249954	1423.8
C7	9	82634.1	10303.6	37488.6	220242	1692.13
C8	9	41395.9	6604.62	36444.1	228084	2134.42
C9	9	17221.8	2255.7	1276.28	1886.51	671.372
C10	9	27657.4	4067.45	30156	213011	939.238
C11	9	22388.8	2955.36	2035.81	2937.27	1351.36
C12	9	35794.7	4573.23	2787.78	3934.07	1464.16
D1	9	33708.5	5112.07	27882.2	220476	1874.03
D2	9	34558.4	5092.3	30077	215131	1463.14
D3	9	33799.3	4994.21	32549.1	218268	1952.36
D4	9	53597.5	8706.12	37683.7	228155	2848.5
D5	9	22041	3513.81	34030.3	214271	1126.09
D6	9	26803	4397.51	36215.1	225188	1803.92
D7	9	24459.6	4030.31	35238.2	218997	1128.35
D8	9	26691.6	4295.02	35251.2	222664	1270.34
D9	9	37287.1	5091.93	3406.42	3827.09	1379.57
D10	9	40642.6	6788.99	34944.5	222810	2182.75
D11	9	28910	4137.35	2451.77	3331.45	898.359
D12	9	44763.5	5827.41	3661.54	4959.48	2005.47
E1	9	45426.4	6529.87	29279.1	226524	1801.36
E2	9	35242.8	5457.38	30835.4	220223	2644.97
E3	9	40426.4	7818.87	35196.2	218835	1778.41
E4	9	28687.9	4634.63	35847.4	231665	1330.01
E5	9	41791.6	7673.72	40567.1	237186	2246.96
E6	9	22671.4	3794.5	36653.4	228460	1321.94
E7	9	25519.5	4193.89	35838.2	220598	898.838
E8	9	27106.7	4446.16	34058.2	213901	1003.79
E9	9	14533.2	1833.27	1140.34	1802.99	460.858
E10	9	27951.9	4502.48	32369.3	219112	1503.22
E11	9	133589	20818.3	13165.9	15891.1	5336.2
E12	9	100674	16572.6	11306.9	15245.8	6774.21
F1	9	102393	16875.4	34356.6	222223	5549.11
F2	9	29073.2	4744.44	29717.7	219778	1579.88
F3	9	25335.4	4221.6	30621	211772	1527.58
F4	9	28709	5456.06	33026.7	210438	2875.69
F5	9	63667.2	10597.1	40578.7	237834	3334.08
F6	9	54005.7	9700.47	37502.6	218203	2972.44
F7	9	25767.3	3960.82	35530.4	225012	1272
F8	9	29046.9	4607.64	33589.2	212503	1202.36
F9	9	23154.1	3050.22	2190.34	2975.41	1436.21
F10	9	33482.5	4892.11	32041.3	219886	1329.16
F11	9	29338.4	4217.91	2615.06	3381.48	1981.85
F12	9	133087	19624.9	12602.3	15932.4	6653.96
G1	9	56769	8272.54	26427.9	203450	3353.04
G2	9	44365.9	6200.17	28548	210925	1611.16
G3	9	27747.9	4469.19	29810.8	215782	3415.98
G4	9	27585.7	4528.79	31607.2	215961	1569.83
G5	9	31260.9	5194.1	36122.6	238920	2242.47
G6	9	32959.1	5396.58	35547.8	229837	2036.28
G7	9	29574.1	4578.51	32196.8	208615	1388.54
G8	9	27608.3	4573.52	35290.4	234812	5119.23
G9	9	15364.8	1979.57	1268.84	2285.24	873.89
G10	9	29041.1	4578.95	32628	234662	1293.57
G11	9	126987	22445.7	14854	18964.7	7771.28
G12	9	74740.7	10732.6	8497.34	8505.34	2361.08
H1	9	63883.2	7614.49	24559.5	202251	8143.25
H2	9	33089	5145.26	25777.1	202673	1908.16
H3	9	28535.4	4365.67	26940.1	201019	1576.87
H4	9	27821.1	4557.2	29451.3	208930	2287.28
H5	9	32453.6	5003.82	31725.8	218068	1696.95
H6	9	30569.3	4464.77	32016.3	217832	1143.29
H7	9	34995.8	5397.99	33547.4	226199	1871.38
H8	9	63275.1	10737.3	35946.2	224708	4295.4
H9	9	20106.1	2676.79	1461.05	2530.2	873.462
H10	9	35596.4	5476.4	32022.5	237014	1704.68
H11	9	108944	16384.6	10003	12128.9	4995.93
H12	9	75159.7	9885.88	5554.43	7777.33	2828.12
A1	10	77164.9	10846.8	26241.4	198174	3521.09
A2	10	105498	19038.2	37077	237646	10291.9
A3	10	43374.1	6569.47	31943.3	234338	2616.19
A4	10	29859.3	4106.66	29722	213178	1618.59
A5	10	27664.2	3939.06	32668.1	227518	1892.44
A6	10	31692.5	5047.12	35325.1	238132	2044.92
A7	10	30210.5	4137.23	30409.3	210022	1391.7
A8	10	37268.7	4997.63	29422	204384	1593.39
A9	10	32947.5	4472.14	3174.91	4615.61	2043.8
A10	10	36877.2	5168.16	26970	196038	2117.31
A11	10	65343.1	8119.69	5128.93	6432.05	2606.89
A12	10	106734	14173.6	8270.71	11230.5	4346.97
B1	10	61400.8	8191.73	26327.6	201299	2619.76
B2	10	43092.2	6341.09	30319.2	225903	2052.02
B3	10	43228.4	5842.25	31328.6	218258	1852.95
B4	10	28069.8	3704.61	32648.1	225470	1169.46
B5	10	28167.1	4167.26	32561.2	214242	1598
B6	10	24967.4	3714.97	34249.2	225765	1417.59
B7	10	30628.5	4468.45	32816.7	214124	1295.01
B8	10	32140.7	7160.64	38243.4	228554	1308.74
B9	10	18014.7	2346.47	1539.79	1996.72	641.224
B10	10	26276.4	3852.74	27598.1	200757	986.594
B11	10	79405.6	11583.7	7159.13	9004.08	3384.2
B12	10	80071.7	9328.26	5467.04	6688.67	3129.12
C1	10	125416	16931.5	37987.5	257762	4224.49
C2	10	44334.4	7078.65	33738.3	242489	2316.46
C3	10	31232.1	4787.64	34277.6	236371	1660.49
C4	10	66305.6	10188.8	43332.9	265824	3208.05
C5	10	24487.8	3844.28	38477.3	247914	1232.23
C6	10	26187.9	4159.15	39524.2	249732	1198.53
C7	10	82491	10247.8	37466.7	219888	2029.64
C8	10	41672.4	6704.47	36217.9	227747	2164.8
C9	10	17314.5	1992.61	1333.29	2003.56	880.164
C10	10	27916.8	4151.65	30491.4	212958	1133.22
C11	10	22123.7	2828.02	2012.63	2589.2	1180.8
C12	10	35756.8	4641.54	3077.78	4147.11	2107.43
D1	10	34674.2	4996.43	27957.2	220044	1994.04
D2	10	34474.2	5000.03	30015.6	215257	1503.05
D3	10	33532	4859.81	32462.4	217083	1543.95
D4	10	53850.8	8680.14	37579.1	227121	2797.91
D5	10	21973	3467.9	34147.4	214117	980.699
D6	10	27104.8	4403.71	36205.2	224979	1597.6
D7	10	24619.5	4034.97	35163.1	218905	1229.37
D8	10	27006.9	4455.25	35298.7	221937	1320.23
D9	10	37805	5192.89	3304.56	4156.64	1187.49
D10	10	40242.4	6716.38	34648.2	222646	2374.77
D11	10	28975.2	4109.81	2469.36	3200.09	1223.95
D12	10	44626.4	5988.28	3762.26	4711.55	1968.87
E1	10	45675.3	6500.64	29221.3	225428	1875.85
E2	10	35106.3	5140.54	30592.9	219833	2652.1
E3	10	40601.6	7969.97	35156.4	218905	1951.52
E4	10	28620	4525.7	35864.4	230890	1394.09
E5	10	41963.3	7550.02	40440.7	235930	1864.22
E6	10	22830.7	3789.98	36815.7	228668	1371.68
E7	10	25600.2	4208.73	35872.2	219770	1161.16
E8	10	26867.2	4330.22	34097	212959	1117.63
E9	10	14597.1	1786.01	1494.01	2047.94	525.932
E10	10	28175	4285.24	32455.1	219691	1605.31
E11	10	134332	20728.6	13218.5	15772.2	5619.67
E12	10	101067	16466.8	11253	15147.1	6855.65
F1	10	102358	16758.1	34266.7	220117	4958.43
F2	10	29518.8	4368.93	29634.6	218826	1816.05
F3	10	25452.7	4237.05	30500.2	211364	1806.71
F4	10	28616.1	4904.24	32473.2	209248	2788.28
F5	10	63170.3	10501.3	40473.1	237482	3372.72
F6	10	54256	9523.26	37543	217429	2895.33
F7	10	25501.7	3886.51	35782.2	225131	1321.71
F8	10	29224.8	4672.93	33469	211840	1755.2
F9	10	23175.3	3205.69	2058.09	3139.63	1223.44
F10	10	33635.9	4815.67	32319	219819	1626.91
F11	10	29559.2	4006.89	2691.29	3665.31	1553.77
F12	10	133771	19767.7	12587.2	16190.7	6747.38
G1	10	55936.2	8364.75	26500.9	203072	3359.76
G2	10	44378.3	6198.88	28358.1	210517	1471.32
G3	10	28595.5	4556.85	29838.5	215737	3476.12
G4	10	27091.9	4204.99	31394.4	215292	1518.08
G5	10	31610.3	5195.18	36084.2	238468	2305.58
G6	10	33073.2	5195.65	35515.4	229074	1711.89
G7	10	30746.2	4764.36	32235.2	207931	1090.72
G8	10	29117.8	4681.58	35103.3	234585	5176.84
G9	10	15243.2	1903.81	1185.81	1917.03	1025.22
G10	10	30063.6	4653.5	32602.1	234375	1444.54
G11	10	127061	22614.7	15084.4	19073.4	7642.45
G12	10	75147.1	10279.6	8598.9	8810.62	2651.99
H1	10	63110.9	7562.87	25452.6	202536	8368.08
H2	10	33006.8	4922.61	25712.9	202542	1933.33
H3	10	28546.2	4439.19	27061.8	201192	1721.1
H4	10	28053	4252.69	29384.8	208441	2199.39
H5	10	31909.1	5306.2	31791.3	218181	1786.42
H6	10	30730.5	4597.22	31974.6	217146	1572.13
H7	10	35524.2	5598.83	33376.3	225721	2291.76
H8	10	63568	10986	35940.9	224521	4256.94
H9	10	20097.8	2617.49	1621.4	2211.57	1053.49
H10	10	35953.9	5642	31952.1	237320	1676.67
H11	10	109719	16188.3	10054.4	12157.3	5226.75
H12	10	76078.7	9453.13	5637.54	8184.51	3051.6
A1	11	76870.5	10673.4	26088.1	197779	3940.52
A2	11	105817	18711.5	37251.2	237479	10485.8
A3	11	43212	6635.5	31969.8	234134	2447.89
A4	11	29461.6	4065.47	29523.1	213159	1632.55
A5	11	27751.6	4025.18	32621.6	227000	1407.66
A6	11	31808.9	5248.84	35201.6	238179	2241.49
A7	11	30431.6	4336.27	30430.7	209959	1095.5
A8	11	37325.6	5052.35	29514.5	204377	1476.37
A9	11	32805.8	4443.74	3113.7	4372.32	2155.78
A10	11	36978.9	5314.15	26914.2	196089	2076.91
A11	11	64555.9	8022.73	5250.61	6707.93	2646.18
A12	11	106325	13927.8	8345.42	11160.4	4527.43
B1	11	61273.1	8299.51	26059.8	200915	2042.08
B2	11	42758.7	6414.81	30649.4	225632	2689.18
B3	11	43602.1	6274.19	31318.3	217869	1738.53
B4	11	28183.2	3792.4	32701.8	224628	1203.92
B5	11	28199.7	4209.16	32450.9	213900	1517.71
B6	11	25294.4	3657.45	34112.6	225175	1364.22
B7	11	30733.5	4463.82	32757.2	214292	1069.69
B8	11	32462.3	7095.29	38214.7	228883	1333.72
B9	11	18113	2319.69	1474.12	2115.19	596.469
B10	11	26510.4	3690.64	27442.3	201388	1459.7
B11	11	79251.3	11601.2	7145.24	9385.73	3618.18
B12	11	80080.4	9287.39	5412.68	7057.88	3114.16
C1	11	123324	16566.4	37801.4	257310	4084.77
C2	11	44577.1	6752.42	33507	241977	2315.32
C3	11	31680.2	4904.35	34128	236389	1534.97
C4	11	65738.2	10285.1	43143	265172	3150.86
C5	11	24402	3934.59	38342.5	247027	1177.15
C6	11	26297.1	4119.62	39396.5	249247	1243.73
C7	11	82660.6	10277.9	37238.4	219504	1659.22
C8	11	41545.6	6602.18	36251.3	226602	1758.85
C9	11	17648.7	2168.3	1273.52	2039.22	607.475
C10	11	28087.6	4095.52	30431.3	212680	1059.24
C11	11	22255.1	2886.71	2033.6	2717.2	1493.49
C12	11	35404.3	4399.22	2828.13	3918.58	1851.14
D1	11	34678.2	4823.62	27784.3	220226	1843.73
D2	11	34354.8	4992.55	29897.8	214189	1466.77
D3	11	34043.7	4868.42	32212.2	216709	1933.99
D4	11	53737.4	8578.19	37290.5	225722	2753.52
D5	11	22298.8	3583.56	33853.3	212668	1235.37
D6	11	27359.5	4334.79	36264.6	223924	1492.4
D7	11	24502.3	3824.72	34977.6	217547	1277.44
D8	11	27042.1	4195.42	35170.6	221242	1452.08
D9	11	38072.6	5218.36	3324.14	3835.72	1113.68
D10	11	39822.4	6602.13	34635.6	222489	2578.4
D11	11	28915.5	4153.87	2493.55	3765.27	1287.1
D12	11	44700.6	6032.15	3775.43	4540.5	2138.73
E1	11	45761	6497.13	29183.4	224994	1871.33
E2	11	35394.6	5333.3	30614.3	218941	2750.77
E3	11	40821.7	7781.94	35259.8	217730	1823.37
E4	11	29090.8	4687.45	35755.7	229186	1525.63
E5	11	41726.9	7699.49	40276.7	235003	1912.6
E6	11	23075.2	4081.87	36663.8	227227	1677.77
E7	11	25904.9	4025.95	35518.3	218434	744.531
E8	11	27096.8	4380.63	34077.1	212708	728.527
E9	11	14653.1	1652.84	1329.85	1988.3	562.204
E10	11	27929.4	4254.35	32258.9	218888	2250.14
E11	11	134246	21092.9	13351.5	15800.1	5304.47
E12	11	100756	16464.9	11241.9	15144.3	6792.93
F1	11	101983	16706.4	34088.3	219776	5177.2
F2	11	29177.1	4633.08	29410.2	218031	1284.04
F3	11	25646.2	4414.65	30392.4	210797	1461.07
F4	11	29154.4	5138.51	32436.2	207677	2613.45
F5	11	62912.7	10639.5	40310.7	236844	3034.08
F6	11	54121.6	9591.77	37345.6	216683	2868.34
F7	11	25632.8	3915.67	35640.9	224133	749.552
F8	11	29636.9	4695.41	33534	211487	1094.83
F9	11	22979.5	2973.64	1939.75	3170.42	1276.63
F10	11	33619.6	4772.82	32271	219201	1444.64
F11	11	29195	4225.54	2637.19	3306.85	1512.3
F12	11	133432	19761.9	12671.5	15999.5	6612.67
G1	11	56970.6	8764.31	26327.7	203190	3114.88
G2	11	45279	6475.9	28451.9	210174	1863.35
G3	11	28215.7	4352.32	29788.4	215352	3168.99
G4	11	27845.7	4446.19	31307.8	215156	1705.68
G5	11	31896.2	5358.68	35824.7	237546	2086.88
G6	11	33502.3	5102.08	35495.8	228655	1749.28
G7	11	33370.4	5021.84	32490.3	208395	1313.35
G8	11	30766.3	4842.61	35051.3	234449	4570.33
G9	11	14931.6	1906.01	1223.06	2007.76	1111.55
G10	11	31838.1	5071.41	32668	234888	1146.94
G11	11	127092	22423.2	14966.1	19315.8	7978.92
G12	11	75854	10904.7	8424.09	8520.6	3061.29
H1	11	61540.9	6512.65	24405.8	201349	8061.75
H2	11	33660.5	4991.31	25815.4	202840	1845.24
H3	11	28401.9	4138.11	26888.9	200959	1694.19
H4	11	28163.6	4563.48	29251.8	208348	1949.52
H5	11	32093.4	5136.24	31741.7	218409	1865.84
H6	11	30634.1	4566.22	31995.4	217160	1166.54
H7	11	36179.9	5402.93	33419.1	225383	2280.14
H8	11	63646.7	10787.4	35942.7	224223	4755.18
H9	11	19892.8	2625.53	1697.8	2612.22	941.091
H10	11	36659.1	5597.15	32098.1	237256	1723
H11	11	109670	16516.7	9910.61	11989.3	5113.72
H12	11	75882.2	9544.51	5646.77	7568.23	2933.56
A1	12	77642.2	10983.6	25963.9	196780	3468.99
A2	12	105558	18962.7	37184.7	236995	10266.2
A3	12	43512.7	6484.71	31946.2	233695	2410.04
A4	12	29493.1	3961.65	29513.5	212558	1553.11
A5	12	27847.3	3987.46	32576.5	226668	1619.07
A6	12	31522.5	5166.51	35150.6	237246	2146.74
A7	12	30736.1	4426.31	30418.5	209087	1579.48
A8	12	37220.8	4978.23	29451.2	203978	1491.54
A9	12	32667.6	4425.53	3160.55	4436.22	2046.08
A10	12	37108.4	5493.48	26884	195961	2097.11
A11	12	64878.7	8087.37	5158.05	6797.02	2863.86
A12	12	107119	13958.9	8201.28	10868.5	4204.85
B1	12	61077.5	8193.06	25957.2	199621	2589.49
B2	12	42751.3	6738.3	30218.1	225049	2070.25
B3	12	43305.8	6287.98	31140.9	217745	1832.65
B4	12	28026.2	3733.34	32541.4	224244	1121.04
B5	12	28348.5	4089.45	32458.8	213129	1435.08
B6	12	25331.4	3662.48	34231	224753	1195.86
B7	12	30697.7	4416.04	32682.1	213402	1233.19
B8	12	32359	7015.87	38208.6	228505	1222.58
B9	12	18055.2	2322.06	1346.08	1952.81	524.046
B10	12	26232.2	3827.01	27633.3	200762	1651.05
B11	12	79351.4	11426.4	7156.35	9208.26	3513.45
B12	12	80405.6	9467.44	5410.5	7322.08	3199.29
C1	12	123225	16942.4	37559	256781	4412.47
C2	12	44659.6	6916.13	33677	241074	2150.1
C3	12	31668.8	4676.5	33947.3	234471	1583.32
C4	12	65229.9	9953.46	42746.6	263602	2926.72
C5	12	24637.9	3820.72	38123.7	245720	1409.79
C6	12	26320.9	4114.07	39262	248658	1239.35
C7	12	82161.2	10217	37144.8	218692	1935.51
C8	12	41567	6552.66	36205	226310	2032.29
C9	12	17176.7	1926.4	1256.05	2146.21	350.986
C10	12	27878.6	4215.02	30343.6	212732	1015.93
C11	12	22016.8	3019.58	2026.98	2375.87	1205.94
C12	12	35445	4562.92	2791.57	3785.59	1720.45
D1	12	35221.2	5234.05	27859.3	219058	1689.78
D2	12	34970.7	5028.71	29691.7	213267	1650.57
D3	12	34311	5117.86	32313.2	216223	2020.42
D4	12	53436.9	8697.13	37097	225322	3143.78
D5	12	22450.5	3374.32	33548	211966	1174.25
D6	12	27681.7	4552.38	35950.3	223956	1757.44
D7	12	24414.8	3983.76	35001.5	217682	1118.57
D8	12	27065.8	4223.13	35095.6	221053	1632.92
D9	12	37763.2	5225.91	3356.47	3846.25	1481.76
D10	12	39334.3	6383.39	34527.2	221894	2107.73
D11	12	28556.7	4092.18	2298.95	3152.62	1300.17
D12	12	44297.7	6015.58	3784.85	4504.95	2100.26
E1	12	46380.8	6674.85	28947.6	223904	1916.48
E2	12	35438.2	5461	30527.5	218266	2373.93
E3	12	41413.2	7976.68	35022.4	217383	1940.28
E4	12	29313.2	4679.75	35438.4	228607	2029.31
E5	12	41804.5	7404.67	39738.7	233964	2069.57
E6	12	23667.3	3813.48	36429.3	226937	1312.37
E7	12	25827.5	4160.48	35408.8	218189	1351.15
E8	12	27044.8	4440.11	33948.1	212563	899.276
E9	12	14593.2	1778.49	1149.16	1797.67	601.675
E10	12	27793.3	4384.28	32267.5	218886	1490.72
E11	12	134838	20876.3	13381.5	15741.2	5726.5
E12	12	101065	16427	11126.7	15249.5	6997.02
F1	12	102283	16637.9	33961.2	218794	5258.27
F2	12	29575.2	4532.08	29289.9	217469	1992.56
F3	12	26197.8	4171.96	30356.5	209790	1837.24
F4	12	29028.5	4872.04	32170.1	207503	2489.05
F5	12	62465.8	10343.5	40130.6	236107	3223.85
F6	12	54079.8	9452.93	37340.9	215743	3073.64
F7	12	25844.1	3860.17	35492.9	223956	1424.05
F8	12	29919	4641.89	33112.8	211247	1395.69
F9	12	22981.6	3224.25	2046.49	2470.19	1015.29
F10	12	33533.6	4884	32236.7	219388	1818.25
F11	12	29264.9	4061.55	2667.93	3721.58	1757.44
F12	12	133817	19855.9	12564.5	15809.3	6758.25
G1	12	56585.8	8748.95	26446.8	202141	2968.22
G2	12	45382.8	6575.11	28301.2	209429	1577.69
G3	12	28361.1	4362.44	29811.8	214665	3608.2
G4	12	27106.9	4173.05	31345.2	214387	1421.04
G5	12	31755.7	5087.98	35630.4	237081	2503.6
G6	12	33440.5	5258.69	35407.4	228183	1875.6
G7	12	35338.2	5295.77	32156.5	207025	1077.05
G8	12	34236.6	5399.86	34899.5	233921	4670.89
G9	12	15254.3	2072.89	1186.87	1929.69	939.965
G10	12	35557.6	5299.57	32671.3	233731	1504.28
G11	12	127290	22139.3	14958.6	19538.1	7663.71
G12	12	74935.1	10448.1	8553.95	8824.18	3086.66
H1	12	62270.4	7362.83	24357.4	201151	7945.11
H2	12	33501	4678.32	25636.3	202008	1931.04
H3	12	28803.5	4077.43	26758.6	200416	1624.23
H4	12	28343	4386.63	29224.4	207545	2073.96
H5	12	31926.9	4830.74	31605.9	217624	1636.63
H6	12	30472.1	4676.12	31994.5	217038	1600.97
H7	12	37920.7	5757.13	33278.4	225392	2101.91
H8	12	65518	11155.9	35716	223684	3923.29
H9	12	19976.4	2697.9	1694.97	2503.81	882.034
H10	12	38508	5895	31925.5	236880	2065.66
H11	12	109478	16307.6	10033.4	12070.9	5329.07
H12	12	75342.9	9777.26	5539.04	7613.83	3382.1
A1	13	77196.3	10927.2	26020.7	196485	3876.4
A2	13	105042	18869.5	37046	237067	10150.6
A3	13	43605.5	6403.9	31855.1	233063	2938.86
A4	13	29903	3919.6	29588.5	212608	1543.51
A5	13	27889.3	4059.35	32560.2	226618	1613.97
A6	13	31475.1	5219.34	35119.7	237242	1835.62
A7	13	30916.2	4437.14	30402.1	209235	1183.37
A8	13	37505.9	4901.35	29406.8	203566	1606.39
A9	13	32726.8	4198.32	3073.66	4520.91	1733
A10	13	36883.6	5422.29	26889.5	195869	1947.45
A11	13	64812.9	8230.21	5115.42	6418.1	2528.31
A12	13	106647	13933.2	8152.88	11395.4	4249.96
B1	13	61367	8127.85	25834.5	199872	2552.91
B2	13	43240.5	6398.3	30268.7	224334	2063.82
B3	13	43595	6208.94	31356.4	216867	1813.27
B4	13	28083.8	3650.34	32401.7	223902	1391.86
B5	13	28632.1	4288.46	32512.4	213102	1586.3
B6	13	25499.6	3719.28	34212	224609	1116.93
B7	13	30875.8	4424.52	32566.3	213283	1094.9
B8	13	32683.3	7188.77	38135.6	228101	1075.25
B9	13	18309.7	2003.84	1373.17	2161.59	537.88
B10	13	26297.1	3584.29	27514.4	201047	1235.88
B11	13	79685.6	11448.5	7003.59	9275.05	3903.1
B12	13	80416.8	9435.41	5549.68	7407.89	2727.62
C1	13	122391	16556.9	37448.7	255701	4030.15
C2	13	44732.2	6923.25	33488.5	240459	2210.49
C3	13	31654.5	4721.88	33873	234253	1715.34
C4	13	64864.9	9918.7	42537.2	263204	2932.26
C5	13	24831.6	3874.91	38032.2	244639	1394.17
C6	13	26453.2	4254.14	39160.8	248132	1196.34
C7	13	82110.3	10219.9	37217.3	218456	1624.02
C8	13	41887.1	6553.48	36210.2	225890	2266.08
C9	13	17331.7	2174.48	1244.1	2216.63	859.465
C10	13	27852.4	4065.64	30232.7	212410	1231.57
C11	13	22220.2	3025.12	1883.46	2683.52	1249.68
C12	13	35751.2	4596.43	2707.09	4138.07	2201.32
D1	13	36922.5	5488.2	27685.2	218382	1544.32
D2	13	35032.3	5174.59	29765.3	212828	1478.86
D3	13	34910.4	4823.26	32014.8	215307	1785.97
D4	13	53739.3	8712.12	37251.8	224356	2836.11
D5	13	22840.1	3485.56	33419.7	210617	1459.47
D6	13	28542.3	4477.27	35966.8	223091	1748.47
D7	13	24508.1	3926.35	34891	216866	1367.87
D8	13	26952.8	4083.69	34988.6	220510	1319.34
D9	13	38111.8	5305.16	3281.05	3597.18	1224.39
D10	13	38981.5	6537.48	34351	221547	2345.3
D11	13	28843.8	4147.26	2345.13	3224.38	1306.7
D12	13	44502.8	5876.16	3889.33	4871.07	1913.51
E1	13	47119.2	6695.89	28939.8	222911	1660.27
E2	13	35747.7	5447.74	30283.8	217444	2633.08
E3	13	41569.6	7709.19	34970.1	216622	1822.25
E4	13	29330.2	4654.44	35573.2	227758	1394.09
E5	13	41709.4	7428.38	39766.5	233090	2151.27
E6	13	24298	4016.8	36468.2	226180	1362.11
E7	13	26005.4	4231	35357.4	218006	705.954
E8	13	26743.4	4163.87	33778.1	212144	610.556
E9	13	14750.5	1835.41	1333.15	2380.21	639.013
E10	13	27964.2	4423.68	32372.5	219075	1352.17
E11	13	134697	20873	13207.8	15921	5379.56
E12	13	101094	16587.1	11334.8	15159.5	6733.95
F1	13	102428	16600.2	33574.9	218861	5276.29
F2	13	29829.3	4666.75	29174.6	216834	1632.09
F3	13	27084.9	4074.89	30268.4	209949	1768.55
F4	13	29447	5145.18	32190.2	205942	2709.83
F5	13	62812.7	10364.2	39919.3	234278	3476.13
F6	13	54424.2	9578.98	37249.7	214751	2519.44
F7	13	25922.6	3838.54	35404.5	222990	1204.74
F8	13	29497.3	4729.66	33161.5	210989	1281.65
F9	13	22821.7	3232.37	2047.65	2989.09	1199.16
F10	13	33698	4921.06	32161.3	219394	1838.63
F11	13	29045.3	4095.87	2681.45	3144.14	1963.56
F12	13	133874	19544.9	12560.2	15952.2	6633.31
G1	13	56359.5	8667.5	26153.1	202075	2812.14
G2	13	45732.4	6532.59	28329.6	209738	1839.44
G3	13	28798.5	4207.36	29727.6	214544	3478.26
G4	13	27648.9	4542.01	31177.3	214074	1617.27
G5	13	31919.3	5053.33	35751	236209	3069.39
G6	13	33589.4	5350.29	35551.8	228036	2071.65
G7	13	41286.2	6114.68	31911.9	207042	1275.27
G8	13	40615.4	6192.31	34916.1	234140	4825.92
G9	13	15277.4	2081.68	1242.22	2156.52	821.67
G10	13	41585.5	6176.05	32698.3	233871	1465.18
G11	13	127353	22477.4	14839.1	18941	7831.32
G12	13	74956.3	10846.8	8229.3	8853.02	2887.08
H1	13	61732.8	7630.62	24483.4	200855	8051.91
H2	13	33813.9	4942.96	25665.6	201464	2056.88
H3	13	28824.1	4131.11	26809.9	200075	1637.14
H4	13	27870.8	4386.63	29084.5	206992	2305.06
H5	13	32491.9	4968.37	31643.6	217907	1650.7
H6	13	30482.9	4463.83	31845.9	216139	1624.23
H7	13	41944	6295.34	33428.6	225316	1915.93
H8	13	68849.7	11584.7	35559.3	223833	4207.74
H9	13	19798	2684.84	1685.54	2530.2	1053.49
H10	13	41988.1	6435.51	31741.2	236353	2151.87
H11	13	109588	16541	10179.5	11978.6	5307.65
H12	13	76011.5	9370.38	5737.58	8357.44	2730.54
A1	14	77422.7	10824.3	25726	196054	3550.48
A2	14	105034	18770.5	37015	236448	10499.8
A3	14	43166.2	6414.74	31733.6	232855	2356.26
A4	14	29947.8	3993.4	29435	212113	1631.68
A5	14	28211.8	3948.31	32427.1	226186	1618.34
A6	14	32054.4	5128.77	34996.2	237038	2015.93
A7	14	30921	4241.49	30362.2	209152	1471.06
A8	14	37415.7	4940.83	29327.4	203336	1771.79
A9	14	32722.6	4332.32	3083.48	4561.72	1796.99
A10	14	36956.4	5273.59	26830	195706	2277.08
A11	14	65043.2	8047.75	5100.86	6563.01	2152.41
A12	14	107043	13818.3	8369.61	11028.9	4077.39
B1	14	61567.1	8226.33	25843.3	199462	2319.57
B2	14	42789.6	6453.32	30219.2	224452	2483.23
B3	14	43595	6249.38	31239.4	216807	1801.28
B4	14	28144.8	3844.27	32263.7	222754	1327.85
B5	14	28502.9	4117.88	32287.7	212995	1793.65
B6	14	25142.7	3646.67	34049.5	224216	1302.59
B7	14	31251.3	4509.3	32570.3	213256	1174.62
B8	14	32804.6	7106.87	38284.3	227917	1473.3
B9	14	18009.5	2034.56	1380.56	1889.01	790.951
B10	14	26793.3	3598.01	27483.6	200481	1454.44
B11	14	79669.3	11448.5	7108.21	9386.68	3579.49
B12	14	80678.5	9427.68	5444.21	7035.3	3115.31
C1	14	121539	16694.5	37189.5	254617	4207.97
C2	14	44455.7	7046.62	33548.6	239819	2277.72
C3	14	31862.9	4850.62	33772.3	233356	1693.96
C4	14	64820.4	10058.6	42541.8	262080	3102.9
C5	14	24845.9	3892.18	37870.8	243892	1450.89
C6	14	26707.3	4083.56	39046.4	247526	1264.14
C7	14	82133.2	10188.4	36904.8	217875	1928.62
C8	14	41989.2	6415.47	35951.4	225686	1905.7
C9	14	17667.7	2162.12	1448.23	1808.78	397.784
C10	14	28384.4	4254.85	30262.2	212087	1028.56
C11	14	22552.7	2991.9	2033.6	2753.13	1250.77
C12	14	35780.7	4600.3	2741.13	3576.43	1650.67
D1	14	38558.2	5593.67	27441	217419	1762.51
D2	14	35668.3	5315.49	29629.1	212500	1382.13
D3	14	36124.8	5338.27	31908.3	215080	1890.77
D4	14	54550.2	8844.04	36631.6	223194	3164.43
D5	14	23422.1	3653.3	33423.4	210064	1023.3
D6	14	29355	4354.15	35823.3	222569	1501.37
D7	14	24929.2	3959.71	34650.1	216492	1179.67
D8	14	27427.7	4398.09	34747	219733	1493.06
D9	14	37937	5081.56	3405.44	3672.86	1306.71
D10	14	38527	6534.83	34225.4	221634	2330.12
D11	14	28904.5	4148.36	2339.63	3628.39	1331.75
D12	14	44709.9	6106.25	3565.53	4631.79	1776.49
E1	14	48576.1	6825.67	28628.2	221953	1759.6
E2	14	35851.3	5211.62	30384.9	216727	2476.17
E3	14	42131.9	7997.95	34773.6	216413	2134.76
E4	14	30097.2	4804.08	35262.8	227249	1605.46
E5	14	42398.1	7608.78	39516.8	231675	1827.67
E6	14	25401.7	4071.02	36340.1	225484	1598.38
E7	14	25760	4357.19	35297.3	217276	1160.19
E8	14	27216.2	4362.48	33544.2	211700	1064.85
E9	14	14624.6	1728.02	1155.77	1948.9	708.355
E10	14	28027.6	4230.93	32119.5	218566	1249.03
E11	14	134489	20705.7	13390.1	15845	5524.47
E12	14	101127	16689	11205.6	15221.1	6864.08
F1	14	103841	16949.5	33568.4	217599	5061.38
F2	14	30579	4547.62	29123.8	216778	1526.43
F3	14	27624.2	4465.39	30160.6	209268	1615.9
F4	14	30038.1	5122.97	32152.2	205778	2613.45
F5	14	62572.4	10420.8	39825.9	233139	3356.81
F6	14	55313.6	9693.16	37053.2	214305	2390.29
F7	14	26107.2	3993.74	35292.1	222449	973.735
F8	14	30010.8	4507.03	33070.5	210466	1596.63
F9	14	23069.4	2888.95	2081.29	2977.69	1475.53
F10	14	33461.8	4581.72	32250.4	219400	1468.41
F11	14	29401	4448	2653.17	3476.9	1926.97
F12	14	133896	19837.4	12871.4	15899.4	6328.05
G1	14	56470.3	8469.25	26270.9	201603	3229.25
G2	14	46140.1	6414.05	28159.9	208825	1814.34
G3	14	28604.9	4291.64	29615.6	213527	3162.55
G4	14	28344.5	4462.71	31063.9	213334	1780.08
G5	14	32150.3	5119.38	35627.1	235619	2103.2
G6	14	33372.6	5158.23	35310.3	228041	1755.34
G7	14	51580.5	7481.46	31880.2	207143	1196.18
G8	14	52218.7	7706.22	34705	233283	5009.24
G9	14	14913.5	1810.49	1352.93	2212.44	998.58
G10	14	52919.9	7822.85	32479.8	233303	1304.43
G11	14	127213	22447	14830.3	19358.2	7823.82
G12	14	75207.2	10614.8	8459.05	8520.6	2841.42
H1	14	62920.6	6496.52	24299.2	200195	7685.15
H2	14	33716	4886.98	25483	200653	1941.33
H3	14	28780.7	4306.16	26793.9	200129	2014.95
H4	14	28517.6	4294.55	29295.8	206672	2390.98
H5	14	31727.6	4955.86	31766.5	217126	1748.22
H6	14	30597.5	4429.07	31861.3	216514	1618.65
H7	14	48326.8	7126.41	33339.3	225036	1891.72
H8	14	74618.4	12238.2	35641.7	223228	4218.48
H9	14	20233.9	2723.03	1619.51	2682.92	1012.53
H10	14	48798	7582.08	31853.1	237185	2190.66
H11	14	109823	16317.9	10089.5	12286.2	5264.82
H12	14	75739.4	9778.98	5800.68	7481.77	2593.62
A1	15	77583	11010.4	25773.5	195585	3971.24
A2	15	104772	18490.9	36715.8	235419	10087.5
A3	15	43321.3	6434.45	31724.8	232821	2446.89
A4	15	29785	4243.09	29327.6	212344	1494.62
A5	15	28261.4	4000.98	32499.6	225721	1637.29
A6	15	31832.1	5294.12	35045.1	236198	2097.24
A7	15	31036.6	4421.57	30359.3	208638	1267.69
A8	15	37536.7	5199.2	29268.5	203222	1703.17
A9	15	32741.4	4625.8	3096.33	4430.83	2012.56
A10	15	37086	5534.93	26865.7	195362	1689.44
A11	15	65030.5	8045.67	5074.86	6628.49	2384.96
A12	15	107115	14070.5	8309.64	10928.6	4455.24
B1	15	62663.3	8236.97	25889.6	198919	2412.91
B2	15	43698.7	6714.09	30226.7	223498	2101.36
B3	15	43846.5	6368.85	31122.3	216026	1678.55
B4	15	28026.2	3646.35	32205.8	222229	1262.19
B5	15	28529.1	4169.51	32317.7	212420	1536.42
B6	15	25730.7	3704.19	34063.2	223898	1221.41
B7	15	31601.8	4567.1	32660.9	212780	1004.61
B8	15	33399.4	7009.26	38010.3	227820	1365.6
B9	15	18207	2355.14	1482.33	2081.22	719.343
B10	15	26719.1	3796.99	27438.7	200356	1291.17
B11	15	79613.1	11625.1	7121.17	9170.1	3347.4
B12	15	80244.9	9344.83	5484.44	6786.9	2962.31
C1	15	121754	16431.5	36950.9	253255	4008.56
C2	15	45141.2	7031.2	33224.8	239589	2024.77
C3	15	32493.7	4796.9	33795.8	232963	1576.81
C4	15	65027.4	9853.62	42353.8	261622	2835.41
C5	15	25036.5	3903.96	37775.1	243480	1247.85
C6	15	26953	4306.15	39058.9	246745	1444.21
C7	15	82011.5	9976.23	36950	217516	1723.51
C8	15	42005.6	6598.94	35905.1	225208	1920.89
C9	15	17287.5	2153.29	1253.29	2158.1	504.879
C10	15	28451.5	4125.39	30018.3	211756	766.909
C11	15	22202.8	2958.68	2082.18	3029.34	1113.01
C12	15	35832.6	4716.3	3013.48	4070.93	1611.34
D1	15	41384.3	5941.84	27490.5	217483	1929.79
D2	15	35933.6	5139.68	29521.1	212037	1322.88
D3	15	37319.4	5192.04	32065.2	214686	2131.71
D4	15	55449.9	8727.11	36804.2	222700	2686.41
D5	15	24375.4	3704.51	33104.1	209117	1142.76
D6	15	31293.9	4810.24	35801.1	222142	1317.88
D7	15	24940.8	3959.71	34850.6	216138	1153.6
D8	15	27571.8	4514.14	34803.7	219242	1256.98
D9	15	38105.4	5377.81	3381.93	4218.9	1735.34
D10	15	38301.5	6212.47	34046.6	220676	2094.34
D11	15	28847.1	3838.83	2532.03	3691.31	841.735
D12	15	44366.7	6023.38	3635.18	5046.93	1692.97
E1	15	51514.4	7759.85	28800.7	221506	1795.71
E2	15	37218.7	5486.29	30231.5	216438	2706.78
E3	15	43837.3	8042.71	34800.9	215534	1836.86
E4	15	31467.7	5134.19	35160.8	226542	1935.99
E5	15	43040.6	7779.9	39455.7	231289	1571.8
E6	15	27064.5	4673.77	36120.8	224899	1134.46
E7	15	25772.3	4219.87	35204.3	216980	888.229
E8	15	27527.5	4149.75	33662.8	211202	978.959
E9	15	14783.9	1717.28	1110.59	2028.77	713.689
E10	15	28147.3	4305.47	32134.5	218175	1981.37
E11	15	134724	21022.9	13251.7	15590.2	5472.64
E12	15	101150	16569.7	11397	15018.1	6921.19
F1	15	106796	17308.6	33608.2	217293	5026.63
F2	15	30975.8	5059.1	29029.5	216460	1440.66
F3	15	29300.6	4529.37	30174.8	208354	1640.98
F4	15	31232.5	5305.06	32058.3	204519	2208.88
F5	15	63756.6	10517.6	39649.1	232078	3310.22
F6	15	56940.3	9564.37	36941.3	213642	2945.45
F7	15	26308.4	4036.06	35211.3	221708	1109.22
F8	15	29725.8	4560.55	32876.7	209407	1204.53
F9	15	23028.2	3003.81	1911.91	2675.47	1058.08
F10	15	33772	4732.28	32109.9	219132	1189.9
F11	15	29690.4	4061.55	2685.14	3480.57	1504.99
F12	15	134041	19659.8	12729.8	15841.2	6237.88
G1	15	56658.1	8407.78	25872.9	200709	2853.85
G2	15	45867.1	6655	28046	208249	1766.54
G3	15	28479.4	4426.49	29500.5	213065	3006.84
G4	15	27402	4564.04	31035.1	212521	1423.2
G5	15	32031	5203.84	35374.1	234490	2523.19
G6	15	33563.2	5530.54	35445.7	227737	1701.78
G7	15	69775	9539.36	31987.7	206283	1232.31
G8	15	71607.4	10199	34826.7	232916	5283.69
G9	15	15289.4	1908.2	1100.65	1766.15	1140.32
G10	15	72575.8	10455.7	32471.2	233056	1442.37
G11	15	127854	22777.1	15081.9	19426.9	7702.49
G12	15	75440.5	10774.3	8525.65	9136.24	3267.63
H1	15	63334.5	7848.41	25071.8	200123	8368.08
H2	15	33643.5	4777.56	25466.1	200210	1855.54
H3	15	28495.2	4113.6	26742.6	199431	1580.1
H4	15	28212.3	4563.48	29077.7	206220	2204.33
H5	15	32508.8	5123.73	31523.6	216614	1680.86
H6	15	30385.7	4639.49	31865	216609	1802.84
H7	15	60586.7	8830.1	33245.2	224155	1961.46
H8	15	86853	14028.6	35640.8	223307	4016.32
H9	15	20137.4	2737.11	1623.29	2640.5	966.809
H10	15	61499.2	9072.51	31856.3	236723	1781.19
H11	15	109775	16478.2	10053.2	12126.5	5271.96
H12	15	75623.4	10039.3	5749.89	7607.54	2499.19
A1	16	79478.3	11275.5	25683.7	195128	3999.3
A2	16	104941	18536.9	36639	234979	10270.9
A3	16	44174.1	6911.44	31712	231815	2655.03
A4	16	30225.4	4094.65	29571.1	212179	1430.89
A5	16	28839.2	4011.66	32473	226261	1786.73
A6	16	32289.4	5164.45	35017.1	236315	2076.03
A7	16	32504.7	4619.94	30276.5	209014	1403.75
A8	16	37933.8	4898.58	29318	203387	1575.33
A9	16	33106.3	4536.23	3170.37	4617.15	2108.55
A10	16	37454.2	5417.78	26629.8	195603	1952.96
A11	16	64577.5	8268.78	5351.48	6534.03	2469.91
A12	16	107637	13851.6	8204.43	10901.9	4244.33
B1	16	64047.5	8553.68	25802	198410	2761.03
B2	16	43910	6653.57	29909.5	223229	2232.23
B3	16	44661.2	6414.8	30911.4	215403	1756.98
B4	16	28685.5	3932.85	32148.8	221249	1318
B5	16	28803.7	4075.24	32152.1	212361	1719.6
B6	16	26287.2	3642.35	34085.2	223622	1153.76
B7	16	32600.1	4718.15	32479.8	212735	906.183
B8	16	34086.7	7392.27	38073	227926	1386.28
B9	16	18456.4	2223.6	1464.28	2043.11	423.956
B10	16	27037.7	3926.5	27409.7	200174	1407.92
B11	16	79531.3	11485.3	7128.58	9468.74	3202.11
B12	16	80195.1	9248.73	5487.7	7463.22	2904.79
C1	16	122581	16938.4	36974	252890	4066.99
C2	16	45217.5	6963.58	33164.7	239316	2377.99
C3	16	33076.9	5009.01	33677.3	232897	1561.01
C4	16	65258.9	9966.83	42248.7	261030	2792.05
C5	16	25721.7	3867.05	37548.8	242708	1460.76
C6	16	27534.7	4408.08	39086.2	246264	1463.17
C7	16	82392.1	10330.8	36946.1	217509	1682.18
C8	16	42579.1	6587.57	35859.7	224868	2365.66
C9	16	17318.1	2119.74	1268	2081.29	635.374
C10	16	28950.8	4165.23	29969.3	211728	1008.71
C11	16	22428.3	2957.57	1883.46	2493.76	1517.54
C12	16	35445	4743.37	2916.39	4039.95	1079.72
D1	16	46213.9	6870.73	27416.8	216867	1697.05
D2	16	37851.7	5569.86	29521.1	211932	1512.72
D3	16	39898.6	5912.42	32027.9	213815	2225.71
D4	16	57294.7	9107.9	36551.1	222133	3106.61
D5	16	26196.7	3961.42	33115.3	208558	971.438
D6	16	34277.6	5264	35652.6	221287	1293.41
D7	16	25424.8	4048.93	34782.9	215440	940.153
D8	16	27952.6	4450.05	34643.6	219110	1481.48
D9	16	37948.8	5140.05	3345.69	3829.97	1232.91
D10	16	38267.1	6039.78	34004.1	220788	2534.64
D11	16	28913.3	4158.28	2424.29	3368.98	1230.48
D12	16	44209	5967.8	3808.38	4539.54	1852.51
E1	16	56609.3	8412.25	28647.1	220905	1869.08
E2	16	38295.5	5627.25	30097.2	215688	2707.97
E3	16	46615.1	8817.21	34606.6	215569	1753.67
E4	16	33633.1	5380.66	34948.9	226037	1288.41
E5	16	45113.2	7622.18	39331.4	230162	2277.06
E6	16	30583.3	4856.31	36197.7	223975	1220.55
E7	16	26908.1	4256.05	35107.3	216357	1072.43
E8	16	27492.5	4653.85	33620.8	210445	1082.44
E9	16	14614.8	1980.4	1241.71	1649.64	613.41
E10	16	28225.1	4257.55	32168.8	217953	1599.06
E11	16	134489	20977	13201.3	15929.6	5762.46
E12	16	101247	16754	11354.3	15215.4	7063.49
F1	16	111191	18170.8	33232.1	216715	5510.51
F2	16	33257.7	5220.96	29117.6	215992	1566.21
F3	16	31964.1	5018.05	30058.3	208108	1702.04
F4	16	33052.9	5710.32	31824.6	203585	2326.55
F5	16	65111.8	10703.7	39551.2	232002	3226.13
F6	16	59631	10069.5	36748.5	213290	3090.99
F7	16	26842	4083.09	34957.6	220588	997.128
F8	16	30390.5	4897.69	32837.7	208959	1306.63
F9	16	23064.2	3226.57	2015.16	2680.03	1426.96
F10	16	33770.9	4815.67	31939.6	218831	1295.19
F11	16	29527.3	4222.99	2608.91	3819.45	1619.63
F12	16	134036	19695.7	12753.6	15984.1	7048.3
G1	16	56672	8543.02	26008.3	200446	3164.66
G2	16	45853.5	6322.57	28304.7	208304	1495.22
G3	16	28496.1	4477.06	29557	213003	3167.92
G4	16	27345.8	4306.32	30864	212068	1546.11
G5	16	32013.7	5261.23	35186.1	234413	2120.61
G6	16	33546.7	5338.47	35233.7	227276	1755.34
G7	16	96668.2	13463.5	31957	206227	1293.82
G8	16	101073	14255.6	34714.4	232547	4522.14
G9	16	15168.8	2134.38	1100.65	2163.91	926.111
G10	16	102176	14574.9	32445.2	233021	1420.65
G11	16	127442	22284.6	14937.4	19315.8	7848.83
G12	16	75361	11089.6	8620.54	8844.54	3069.75
H1	16	62949.1	5809.28	24036.1	199460	8139.03
H2	16	33658	5196.15	25412	199965	1934.47
H3	16	28662.4	4146.28	26663.6	199283	1591.94
H4	16	28537.6	4404.42	28985.7	205191	1915.95
H5	16	32111.2	4986.1	31526.6	216645	1897
H6	16	31003.8	4636.67	31713.6	216387	1440.97
H7	16	81866.3	11917.9	33319.3	224036	2011.83
H8	16	105789	16842.9	35528.3	222955	4019
H9	16	20160.3	2840.64	1666.67	2699.89	1000.15
H10	16	81870.2	12452.4	31830.7	236748	2035.49
H11	16	109992	16383.3	10031	12319.4	5531.33
H12	16	75974.6	9591.06	5475.94	7859.08	2828.12
A1	17	81708	11541.9	25566	193754	3726.8
A2	17	104857	18616	36452.1	233789	10468.2
A3	17	44915.4	6678.86	31642.5	231292	2775.53
A4	17	31012.6	4352.07	29269.2	211448	1446.6
A5	17	29288.5	4058.64	32249.7	225273	1775.8
A6	17	33353.3	5370.28	34919.4	235863	1929.66
A7	17	33986.1	4777.68	30247.9	208495	1265.57
A8	17	38344	5091.83	29101.1	202515	1447.48
A9	17	32935.4	4421.16	3113.7	4353.84	1917.34
A10	17	37842.9	5469.15	26740.4	195519	2217.4
A11	17	64985	7898.66	5265.17	6466.4	2589.9
A12	17	107242	14082.4	8240.2	10869.6	4216.13
B1	17	66760.3	8978.17	25844.5	197526	2604.63
B2	17	44145.9	6715.19	29809.4	222761	2443.54
B3	17	45766.1	6616.99	30991.3	215571	2116.87
B4	17	29058.7	3987.92	32006.6	220320	1249.88
B5	17	29355.3	4344.58	32216.8	211523	1488.09
B6	17	27538.6	3873.86	33935.7	223200	1014.71
B7	17	34412.6	4987.89	32365.6	212765	1138.83
B8	17	35317.5	7509.74	38115.6	227299	1291.51
B9	17	18100.9	2276.37	1584.11	2203.02	764.098
B10	17	27599.7	3915.35	27324.3	199686	1435.13
B11	17	80254.9	11546	7133.2	9166.28	3899.33
B12	17	80368.2	9480.7	5489.88	7059.01	2660.9
C1	17	124758	16813	36584	251549	4158.44
C2	17	45640.3	7083.4	33052.5	237897	2438.38
C3	17	34028.3	5129.42	33609.6	232447	1937.54
C4	17	65621.1	10042.6	42015.1	260380	2709.96
C5	17	26313.3	3987.21	37497.2	242082	1309.5
C6	17	28275.4	4380.35	38854.3	246022	1329.02
C7	17	83899.2	10476.8	36813.6	216673	1696.73
C8	17	43960.7	6753.17	35806.5	224410	2055.08
C9	17	17499.2	2438.46	1468.46	2257.78	684.872
C10	17	29228.9	4431.38	30053.4	211237	1324.5
C11	17	22349.2	3018.47	2075.56	3011.38	1252.96
C12	17	35841.1	4798.8	2918.91	3732.66	1768.67
D1	17	54958.4	8143.98	27470	216486	1962.52
D2	17	39991.1	5921.48	29372.6	211326	1240.65
D3	17	44394	6491.94	31941.3	213583	2038.79
D4	17	61157.3	9672.58	36597.1	221963	2934.19
D5	17	29134.6	4404.62	32968.3	208246	751.961
D6	17	39715.4	5947.75	35566.8	221022	1506.26
D7	17	25943.6	4128.84	34612.2	215085	1176.41
D8	17	28362.8	4429.27	34594.2	218399	1203.53
D9	17	38388.5	5178.73	3232.08	3797.4	1341.72
D10	17	38025.2	5951.22	34142.3	220006	2612.34
D11	17	28737.8	4038.21	2287.96	3364.57	1277.3
D12	17	44241	5970.73	3710.49	4568.37	2066.47
E1	17	64499.2	9468.02	28560.4	220445	2066.59
E2	17	40810.5	5976.62	29946.2	215679	2754.33
E3	17	50637.3	9130.6	34490.8	215160	1804.26
E4	17	37197.9	5849.41	34935.3	225636	1570.61
E5	17	47822.8	8260.28	39320.7	230190	1969.58
E6	17	35985.2	5342.49	35984.1	223767	1244.46
E7	17	27456.6	4521.42	35112.2	216377	1170.8
E8	17	28134.8	4347.36	33411	210188	840.29
E9	17	14747.5	1703.32	1116.1	2183.19	805.434
E10	17	28380.6	4269.26	32063.8	218130	1502.17
E11	17	134661	20859.9	13410.4	15961.7	5590.05
E12	17	101482	16683.2	11219.6	15590	6976.42
F1	17	119353	19224.3	33549.2	216379	5379.24
F2	17	35628.4	5417.78	29097.7	215307	1543.83
F3	17	36357.5	5126.15	30027.8	208260	1809.98
F4	17	36008.8	6211.07	31617.7	203926	2405
F5	17	68158.5	11311	39269.9	231642	3427.26
F6	17	65075.2	10796.6	36552	212949	2722.81
F7	17	27642.9	4035.12	35003.8	220859	1151.13
F8	17	30746.2	4661.16	32711	208121	1216.48
F9	17	23059.9	3349.56	2081.29	2970.85	1367.99
F10	17	33597.8	4749.66	31888.2	219319	1218.2
F11	17	29494.2	4109.85	2562.19	3695.89	2179.43
F12	17	133720	19836.2	12729.8	15741.2	6676.77
G1	17	56245.6	8670.57	26111.1	199494	3215.79
G2	17	45531	6679.48	28035.3	207661	1723.51
G3	17	28658.3	4541.11	29239.3	211925	3300
G4	17	27165.1	4620.21	30825.5	211752	1524.55
G5	17	32333.2	5155.12	35109.3	233064	2473.14
G6	17	33581.5	5220.28	35059	226921	1820.02
G7	17	130394	17619	31887.9	206006	1185.44
G8	17	138541	18961.5	34728.9	231891	4770.41
G9	17	15241.2	2087.16	1199.65	2487.81	1150.98
G10	17	139328	20146.7	32456.1	232723	1447.8
G11	17	127888	22613.4	14931.2	19217.1	7517.37
G12	17	75295.6	11071.4	8380.8	8683.42	3189.83
H1	17	61739.1	6336.81	23914.3	198086	7554.46
H2	17	33502.2	4629.97	25388.4	198761	1958.49
H3	17	28684.1	4227.97	26806.7	198873	1826.58
H4	17	27997.6	4658.71	28840	204254	2311.97
H5	17	32157	4892.25	31258	216181	1810.55
H6	17	30897.5	4771.94	31793.4	215490	1744.23
H7	17	111909	15743.8	33284.2	224067	2212.33
H8	17	134346	20449.8	35586.8	222565	4120.98
H9	17	20107.9	2708.96	1617.63	2327.52	1047.77
H10	17	112443	17023.7	31888.2	236264	2018.25
H11	17	109873	16425.6	10063.7	12231.8	5219.61
H12	17	76265.2	9270.38	5794.52	7914.1	2914.68
A1	18	86313.9	12249.7	25644	193948	3451.63
A2	18	105551	18507.5	36479.6	233800	10196.1
A3	18	46892.5	6908.49	31621.9	231498	2420
A4	18	31904.5	4394.97	29266.6	211114	1553.98
A5	18	30598.6	4208.11	32269.6	225421	1433.91
A6	18	35320.5	5537.01	34989	235828	2058.35
A7	18	37111.8	5229.25	30330.7	208258	1281.16
A8	18	39400.5	5258.77	29293.9	202685	1568.83
A9	18	32930.3	4489.62	3134.86	4489.35	2129.88
A10	18	38658.6	5502.49	26636.2	195074	2416.64
A11	18	64811.6	7742.27	5155.97	6948.38	2662.11
A12	18	107051	13853.7	8126.57	11113.6	4591.72
B1	18	71085.2	9828.48	25903.3	197824	2110.19
B2	18	44809.2	6666.78	29882.6	222106	2014.47
B3	18	47899.6	6600.44	30904.9	215427	1972.92
B4	18	30382.6	3933.65	31804.9	220075	1011.89
B5	18	31116.4	4474.76	32043.3	210232	1562.14
B6	18	29260.1	4190.93	34010.1	222898	1107.16
B7	18	37727	5394.82	32410.4	212196	1152.66
B8	18	37357.9	7642.1	38006.9	227326	1288.06
B9	18	18086.3	2188.15	1410.1	2198.05	357.23
B10	18	28502	3914.5	27320.8	199365	1185.84
B11	18	79728.6	11771.4	7060.07	9368.55	3667.24
B12	18	80355.8	9467.44	5463.78	7428.22	2840.36
C1	18	130853	17894.8	36486.5	251564	4147.01
C2	18	46662.3	7075.09	33034	237864	2150.1
C3	18	36137.6	5298.92	33661.3	232136	1958
C4	18	67086.3	10395.6	42001.1	260379	2723.8
C5	18	27877.5	4044.54	37333.3	241816	1375.26
C6	18	30763.3	4501.7	38884.6	245488	1294.76
C7	18	86321.8	10843.9	36650.7	216276	1722.75
C8	18	46124.9	6975.6	35864.8	224008	1983.34
C9	18	17529.8	2133.87	1393.06	2007.22	652.473
C10	18	30419.6	4521.91	30059.9	211222	1154.87
C11	18	22624.8	3000.76	2087.7	2694.74	1139.25
C12	18	35570	4758.84	3090.39	3865.64	1489.54
D1	18	67493.2	10003	27305.6	215968	1758.87
D2	18	44491.2	6418.99	29403.3	210921	1792.05
D3	18	52397.9	7166.08	31554	213168	1865.92
D4	18	67233.2	10255.3	36535.4	221554	2794.81
D5	18	33825.8	4890.2	32941.1	207970	1222.4
D6	18	48537.5	6943.56	35661.7	220087	1578.84
D7	18	27972.3	4508.21	34557	214873	1153.6
D8	18	30033.1	4602.49	34470.7	218010	1118.9
D9	18	38302	5403.28	3415.23	3937.26	1515.82
D10	18	38587.3	6119.48	33787.3	220122	2226.52
D11	18	28852.6	4092.18	2336.33	3352.42	1075.85
D12	18	44659.4	6020.45	3755.67	4774.98	1866.58
E1	18	77101.4	11421.7	28527	220503	1493.23
E2	18	45368.4	6619.94	29958.1	215712	2643.78
E3	18	57902.5	9916.29	34668	214914	1572.69
E4	18	43287.1	6534.92	35105.3	225174	1423.33
E5	18	53201.4	8946.83	39244.6	229329	2164.18
E6	18	44941.3	6645.57	36199.6	222718	1194.72
E7	18	29112.9	4455.54	35213	216046	922.948
E8	18	29663.4	4772.82	33554.7	210091	860.987
E9	18	15134.8	1892.34	1279.17	1951.03	514.198
E10	18	28811.3	4126.56	32013.4	217529	1086.52
E11	18	135224	20870.8	13317.1	15940.3	5335.14
E12	18	101158	16699.7	11355.2	15441.1	6716.16
F1	18	130288	20922.1	33114.1	216399	5049.8
F2	18	40143.3	5992.7	28858.4	215486	1605.98
F3	18	43285.6	6403.55	29994.1	208293	1614.81
F4	18	42107.3	6808.42	31660.2	203111	2809.57
F5	18	73958	11980.2	39382.2	230772	3107.94
F6	18	73243.9	11978.5	36611.3	212977	2739.19
F7	18	29111.8	4178.09	34909.6	220091	1015.65
F8	18	32395.8	4793.87	32517.1	207885	1299.02
F9	18	23589.2	3254.42	2020.96	2971.99	1265.07
F10	18	34354.2	4750.81	31866.5	218500	1609.93
F11	18	29390	4289.1	2541.29	3508.71	2089.17
F12	18	134043	19544.9	12622.8	15986.3	6596.38
G1	18	57256.9	8824.25	25883.8	198387	2689.69
G2	18	45527.3	6433.38	28027	207225	1723.51
G3	18	28682.4	4670.35	29367.2	211753	3326.85
G4	18	27935	4494.65	30697.1	211149	1566.6
G5	18	32391	5123.71	35235.3	232536	1859.48
G6	18	34026.3	5341.43	35309.3	226606	1953.41
G7	18	164118	21898.4	31884.1	206141	1249.88
G8	18	175753	23952.4	34586.5	232057	5108.76
G9	18	15715.6	1885.15	1314.61	2145.97	982.594
G10	18	175765	25233.9	32549.1	232439	1277.28
G11	18	127780	22547.4	15191.5	19741.7	7354.76
G12	18	74806.1	11114.9	8272.59	8814.01	2794.06
H1	18	63209.2	6415.86	23701.1	198053	7495.44
H2	18	34037.4	4810.64	25469.5	199015	1868.12
H3	18	28742.7	4279.32	26568.6	198094	1640.37
H4	18	28779	4360.47	28746.1	204328	1985.08
H5	18	32643.5	5128.94	31382.9	216058	1901.02
H6	18	31051.2	4718.4	31609.4	215342	1352.59
H7	18	148397	20806.4	33132.1	223552	2206.52
H8	18	169907	25367.4	35498.2	222298	3826.68
H9	18	20117.1	2937.14	1755.34	2681.03	1191.6
H10	18	149506	22203.4	31866.9	235845	2201.43
H11	18	109954	16462.8	10126.9	12476.7	5078.02
H12	18	76300.5	9989.32	5685.25	7766.32	2543.26
A1	19	95248.5	13772.5	25498.6	193464	3372.82
A2	19	106754	18797.6	36229.6	232863	9846.9
A3	19	50721	7544.15	31309.3	230392	2340.33
A4	19	34655.6	4757.93	29187.2	210422	1448.35
A5	19	33143.3	4654.41	32146.9	224727	1361.01
A6	19	38829.6	5907.52	34841.8	235794	2096.53
A7	19	42936	6001.04	30205.1	208229	1451.22
A8	19	41655.8	5584.32	29234.3	202179	1544.99
A9	19	32807.5	4504.18	3068.37	4476.26	2071.98
A10	19	40910.1	5718.77	26681.9	195356	2342.27
A11	19	65439.3	8270.87	5068.62	6572.67	2347.79
A12	19	107810	13986.8	8352.78	10862.9	4632.33
B1	19	80962	11439.9	25701.8	197432	2372.54
B2	19	46338.4	7063.99	29853.5	221900	2398.49
B3	19	51563.6	7251.12	30773.8	214740	1542.9
B4	19	32537.5	4446.01	31740.5	218837	1272.86
B5	19	33957.9	4867.54	32078.8	210470	1382.07
B6	19	32708.5	4600.75	33827.1	222668	1116.93
B7	19	43749.8	6189.4	32339.5	211915	894.795
B8	19	41277.7	8293.97	37964.3	226952	1294.09
B9	19	18267.4	2244.87	1503.67	2013.29	550.899
B10	19	30228.5	4080.89	27295.3	199316	1298.2
B11	19	79735.7	11466.9	7109.13	9347.56	3599.31
B12	19	79968.3	9455.29	5390.93	6941.58	2812.75
C1	19	142208	19619.7	36498.1	251219	3965.38
C2	19	48805.1	7438.1	33124.2	237617	2013.37
C3	19	40145	5850.94	33614.3	231926	1389.01
C4	19	69569.2	10563.2	41858.7	259752	2650.01
C5	19	30492.2	4624.91	37351.6	241023	1458.29
C6	19	34465.7	5043.95	38719.1	245164	1183.22
C7	19	91985.9	11348.1	36557.1	215310	1605.65
C8	19	50086.1	7490.27	35591.4	223358	1853.37
C9	19	17278.5	2138.28	1218.35	2107.81	520.179
C10	19	32181.4	4692.1	29902.8	210984	989.764
C11	19	22452.7	3004.08	2021.46	3027.1	1554.72
C12	19	35815.8	4856.8	3065.17	4028.33	1819.42
D1	19	85292.4	13089.6	27418	215956	1682.51
D2	19	51041.3	7488.82	29461	210873	1731.59
D3	19	63895.8	8867.01	31697.7	213200	2106.86
D4	19	77332.4	11459.6	36512.4	221059	3158.23
D5	19	42291.3	6097.08	32855.9	207209	1120.53
D6	19	62287.3	8464.38	35404.3	219599	1549.48
D7	19	30674.6	4662.59	34481.9	213895	980.888
D8	19	32572.2	4898.7	34293.2	217617	1344.29
D9	19	38097.2	5342.9	3518.07	3918.1	1478.92
D10	19	38550.3	6191.22	33566	219831	1997.88
D11	19	29199.3	4076.76	2382.51	3652.67	1317.59
D12	19	44820.2	5949.28	3811.2	4620.26	2351.76
E1	19	95236.2	14507.2	28578.2	219974	1620.77
E2	19	52118.7	7615.04	29917.7	215090	2799.51
E3	19	69347.4	11531.3	34526	214456	1749.18
E4	19	53048.9	7686.98	34836.8	224539	1779.72
E5	19	62267.3	10091.1	39007.8	229052	1786.82
E6	19	59169.1	8188.14	35708.9	222259	1621.34
E7	19	32031.8	4933.38	34855.3	215062	1169.84
E8	19	32161	4887.75	33277.8	209586	904.45
E9	19	14615.8	1748.42	1360.7	2026.64	448.056
E10	19	29683	4410.9	32037	217274	1383.42
E11	19	134957	20920.1	13357.9	15948.9	6046.98
E12	19	101508	16682.2	11202.9	15327.3	7048.51
F1	19	147955	23570	33198.8	216012	5155.32
F2	19	47053.9	7079.11	29094	214698	1650.73
F3	19	54519.7	8114.48	30069.2	207014	1753.28
F4	19	50663.4	7868.77	31505.9	202893	2527.16
F5	19	82906.1	12947.6	39109.7	230244	3269.31
F6	19	86029.4	13343.2	36558.6	212052	2889.55
F7	19	32411.2	4630.51	34944.2	219974	1243.73
F8	19	35372.6	5463.88	32785.7	207216	1289.25
F9	19	23398.7	3362.32	1951.36	2929.79	1244.25
F10	19	34672	5048.46	32083.6	218023	1332.55
F11	19	29370.3	4336.13	2647.03	3438.98	1696.46
F12	19	134021	20054.4	12582.9	15689.5	6467.1
G1	19	56036.2	8403.17	25697	198724	3153.9
G2	19	45884.4	6901.1	27949.8	206784	1796.42
G3	19	28500.3	4571.46	29301.1	211201	3121.74
G4	19	27817.5	4322.84	30816.9	210731	1154.73
G5	19	32624	5097.73	35163.7	232066	2168.48
G6	19	34403.3	5312.86	34969.6	225881	1800.82
G7	19	191137	25288.3	31780.5	205187	1531.11
G8	19	206260	27799.2	34880.8	231657	4979.91
G9	19	15467.3	2127.79	1316.74	2226.16	761.99
G10	19	206673	29423.2	32206.2	232089	1228.4
G11	19	127493	22498.5	15059.5	19480.6	7931.39
G12	19	75350.4	11174.7	8319.21	8559.61	3169.53
H1	19	62118.2	7458.01	23925.4	197248	7520.74
H2	19	33749.9	4958.23	25154	198368	2011.12
H3	19	28703.6	4323.66	26625.2	197610	1693.11
H4	19	28503.3	4561.39	28548.5	203830	1985.08
H5	19	32526.5	5146.67	31460.2	215474	1438.58
H6	19	31275.5	4497.65	31596.8	215511	1409.34
H7	19	183855	25460.4	33222.4	223418	2095.13
H8	19	203955	30050.1	35405.3	222139	4425.11
H9	19	20351.6	2932.11	1694.97	2703.66	950.616
H10	19	185658	27890.3	31772.1	236172	2002.09
H11	19	110053	16285.8	10176	12483.8	5575.36
H12	19	76320.7	9473.82	5560.59	7634.26	3347.47
A1	20	110611	16254	25579.2	193152	4112.84
A2	20	109152	19335.4	36209	231969	10319.9
A3	20	58583.6	8575	31423.9	230260	2238.75
A4	20	38608.9	5456.38	28978.7	210206	1523.43
A5	20	38012.7	5376.17	32168.3	223941	1455.05
A6	20	45599.3	6940.13	34816.7	235698	2072.49
A7	20	54553.6	7755.18	30149.4	207709	1426.42
A8	20	45696.8	5918.88	29092.3	202045	1301.58
A9	20	33160.3	4605.41	3093.3	4333.05	2001.9
A10	20	43731.1	6295.51	26566.7	194668	2151.29
A11	20	64815.4	8138.46	5162.21	6666.06	2629.19
A12	20	107565	13841.9	8254.93	11250.6	4476.67
B1	20	96963.4	14157.2	25808.2	196710	2317.04
B2	20	49242.4	7400.69	29828.8	221780	1890.04
B3	20	58855.1	8286.86	30928.1	214412	1857.57
B4	20	37434.2	4843.44	31635.5	218653	1092.31
B5	20	38370.8	5282.77	31732.8	209434	1570.71
B6	20	39081	5304.63	33741.3	222115	1030.5
B7	20	54907.1	7545.04	32368.8	211412	886.66
B8	20	48697.9	9156.79	37861.6	226923	1178.64
B9	20	18448.6	2404.76	1492.18	1895.64	643.665
B10	20	33908	4830.51	27255.7	199432	1443.9
B11	20	80069.9	11703.3	7131.35	9328.48	3582.33
B12	20	80590	9682.84	5479.01	7179.82	2908.24
C1	20	161940	22803.8	36414.7	250934	3641.49
C2	20	51782.3	7930.42	33039.8	237080	2003.12
C3	20	48154	7020.76	33536.2	231494	1340.66
C4	20	75763.2	11377.9	41952.7	259474	3039.25
C5	20	36020.2	5364.71	37180.2	240766	1369.51
C6	20	41706.7	6018.9	38694	244992	1392.45
C7	20	103000	12881.5	36391.9	215159	1581.16
C8	20	57976.6	8403.52	35690	223116	1843.24
C9	20	17392.9	2023.51	1488.69	1919.43	164.693
C10	20	36128.8	5314.03	29984.1	210698	1027.66
C11	20	22194.6	2896.67	1912.16	2743.02	1173.14
C12	20	35717.5	4641.54	2756.26	3688.76	1053.08
D1	20	107582	16492.5	27216.1	215359	1710.39
D2	20	62002.3	9349.18	29227.9	210392	1633.64
D3	20	80815.3	11147.5	31569.3	212771	1993.41
D4	20	91811	13509.4	36496.7	221030	3233.6
D5	20	54489	7566.17	32885.8	206840	1260.37
D6	20	81371.1	10874.1	35433.2	219359	1639.19
D7	20	36436.6	5309.62	34353.3	213681	1347.5
D8	20	37468.5	5654.81	34327.1	217284	1477.91
D9	20	38337.5	5489.14	3319.25	3828.05	1677.62
D10	20	39138.1	6347.97	33569.6	219319	1942.51
D11	20	28772	3929.16	2492.45	3447.35	993.095
D12	20	44354.4	6079.93	3697.31	4717.32	2148.12
E1	20	117952	17817.1	28515.9	219558	1600.45
E2	20	62742	9112.5	30075.8	215105	2649.72
E3	20	85674	13619.8	34477.1	214285	2181.98
E4	20	67537.4	9856.85	34960.3	224749	1578.47
E5	20	76002.7	11789.9	39101	229493	1579.32
E6	20	78968.5	10617.2	35936.7	222080	1276.03
E7	20	37233.7	5635.77	34881.5	215292	1163.09
E8	20	36643.8	5456.38	33376.4	209375	1080.37
E9	20	14767.2	1836.49	1290.18	1503.74	489.661
E10	20	30160.9	4582.35	32080.9	217387	1421.96
E11	20	135108	21049.1	13383.6	16098.8	5413.41
E12	20	101496	16600.7	11290.2	15205.9	6967.06
F1	20	169533	27226.8	33400.3	215514	5520.8
F2	20	57551.9	8608.36	28862.2	214619	1720.34
F3	20	70328.3	10333.9	30019.1	207017	1581.01
F4	20	63907.9	9663.03	31592	202841	2522.67
F5	20	96929	14724.7	38899.6	229981	3111.35
F6	20	104296	15666	36459	211902	2929.06
F7	20	37420	5382.04	34769.2	219875	1271.02
F8	20	40358.7	5865.24	32731.6	207196	1619.43
F9	20	23069.4	3319.39	1949.04	2986.81	771.299
F10	20	35967.1	5027.62	31827.7	217751	1568.04
F11	20	29421.8	4273.84	2890.46	3522.17	1801.35
F12	20	134429	19843.2	12703.9	16067.6	6612.67
G1	20	55709.9	8263.32	25791.7	198535	2791.95
G2	20	45896.7	6073.9	27843	206581	1531.08
G3	20	28903.2	4350.07	29098.5	211206	3156.1
G4	20	28630.5	4644.44	30727.1	210346	1662.55
G5	20	32723.1	5384.67	34874.3	232138	2355.63
G6	20	34803.7	5305.97	34882.2	225602	2075.69
G7	20	211095	27834	31997.3	205079	1289.92
G8	20	228161	30508.1	34621.8	231292	4698.13
G9	20	15391.9	1903.81	1317.8	2144.92	812.079
G10	20	229226	32346.3	32463.6	231628	1410.87
G11	20	127928	22337.4	15068.2	19385.7	7842.58
G12	20	75353.9	10727.2	8563.94	8462.94	3064.67
H1	20	62744.6	7520.92	24659.2	196691	7279.04
H2	20	33533.6	4860.26	25140.5	197718	1825.79
H3	20	28829.6	4051.75	26399.9	196978	1530.58
H4	20	28822.9	4362.57	28725.6	202935	2113.47
H5	20	32767.9	5038.23	31208.5	214542	1692.93
H6	20	31391	4946.66	31702.8	215322	1374.92
H7	20	211700	29533.6	33135	223111	1736.74
H8	20	231414	33867.7	35355.7	221747	4002.9
H9	20	20585.2	2813.5	1693.08	2372.77	1069.68
H10	20	215054	32130.4	31603.8	235699	2188.5
H11	20	110095	16496.2	10204	12720.5	4999.5
H12	20	75610	9970.35	5656.01	7852.79	3292.39
A1	21	132707	19907.2	25650.6	192385	3489.03
A2	21	114905	19942.8	36078.3	232155	10051.3
A3	21	71678.5	10618	31313.2	230117	2573.37
A4	21	47609.7	6601.03	29209	209687	1495.49
A5	21	47701.9	6554.18	32098.1	223806	1546.9
A6	21	57456.2	8570.36	34673.8	235207	1724.6
A7	21	72591.9	10105.8	30254.4	208013	1578.06
A8	21	52873.5	7063.18	29080.7	202438	1410.64
A9	21	32935.4	4349.8	3180.95	4236.81	1768.04
A10	21	49696.3	7233.62	26636.2	194984	2136.6
A11	21	65024.2	8108.22	5041.58	6612.39	2376.47
A12	21	107719	13772.2	8262.3	10946.5	4256.73
B1	21	119767	17412.1	25618	196662	2671.48
B2	21	55335.8	8372.26	29722.3	221198	2329.84
B3	21	71593.8	10045.9	30735.7	214533	1852.95
B4	21	46478.6	6182.59	31643.7	218421	1284.35
B5	21	47051.3	6313.74	31783.2	209383	1668.15
B6	21	50790.9	6912.27	33744.3	221571	1186.08
B7	21	74579	10044.4	32248.1	211169	1054.23
B8	21	62171.8	10726.9	37963.4	226085	1458.65
B9	21	18494.3	2123.56	1529.94	1919.66	713.646
B10	21	40157.1	5503.8	27226.6	198982	1446.54
B11	21	79551.8	11322.4	7131.35	9257.88	3751.21
B12	21	80036.8	9524.88	5511.62	7311.92	3061.24
C1	21	190859	26872.2	36265.9	249681	4033.96
C2	21	58291.9	8746.59	33003.9	237336	2513.58
C3	21	61682.1	8555.51	33267.1	231107	1671.64
C4	21	86174	12607.2	41891.3	258640	2723.8
C5	21	46017	6265.51	37092	240503	1513.37
C6	21	55301.2	7481.33	38670.4	244280	1423.8
C7	21	122202	15165.8	36409.8	214758	1581.93
C8	21	71613.1	10148	35629.1	222764	1920.89
C9	21	17661.4	2094.14	1216.51	1956.92	885.564
C10	21	42780.4	6115.21	29909.2	210389	1135.93
C11	21	22158.6	2919.92	2066.73	2306.25	869.197
C12	21	35404.3	4873.56	2970.61	3958.6	1811.8
D1	21	132548	20496.6	27358.8	214966	2259.5
D2	21	77583.9	11210.8	29118.7	210250	1377.29
D3	21	102301	14436.4	31668.1	212816	1887.53
D4	21	111572	16118	36469.5	220336	3094.22
D5	21	73015.9	9566.75	32845.6	206329	934.396
D6	21	104998	13744.6	35381.2	218507	1868.35
D7	21	46237.9	6374.02	34427.5	213478	1187
D8	21	46628.3	6632.64	34199	216740	1215.11
D9	21	38251.9	4999.47	3481.83	3873.08	1618.01
D10	21	40898.2	6309	33417.9	218458	2148.82
D11	21	29095.5	4272.83	2621.09	3561.05	1069.32
D12	21	44795.5	5920.03	3731.19	4863.38	1580.35
E1	21	143504	21703.5	28346.7	219674	1416.48
E2	21	78499.9	11417.1	29961.7	214470	2451.2
E3	21	106954	16868.9	34682.7	214073	1804.26
E4	21	88426.4	12444.8	34706.5	224361	1269.3
E5	21	95513.7	13889.8	38938.1	228351	1810.47
E6	21	103366	13649.9	35885.4	221197	1461.59
E7	21	47229	6972.8	34770	214384	920.055
E8	21	45347.4	6373.84	33147.8	209020	881.684
E9	21	15042.4	1845.08	1184.41	1932.92	631.546
E10	21	32335	4823.02	31810.8	216943	1487.59
E11	21	135037	21068.8	13272.1	15817.2	5587.93
E12	21	101673	16595.9	11258.6	15412.7	7362.13
F1	21	192809	30889.2	33212.9	215277	5133.44
F2	21	74026.8	11098.4	29086.6	214566	2108.16
F3	21	91653.1	13042.1	29947.3	206490	1752.19
F4	21	81967.7	12305.6	31524.9	201692	2809.57
F5	21	116434	17210.2	39000.8	229699	3432.94
F6	21	127103	18323.1	36408.2	211088	2986.89
F7	21	48092.4	6478.77	34767.3	219272	1102.4
F8	21	49990.3	7070.4	32565.9	206208	1496.7
F9	21	23010.2	3246.3	2083.61	3161.3	1189.9
F10	21	38001.2	5214.08	31855.1	217380	1493.32
F11	21	29396.1	4205.2	2621.21	3219.99	1798.91
F12	21	134216	19910.5	12608.8	16167.6	6680.03
G1	21	56501.1	8562.99	25560.3	198073	3096.04
[truncated: 11,063 more rows]

## Sheet: Multicomponent Data
Block Type	96alum
Chemistry	SYBR_GREEN
Experiment File Name	C:\Users\Administrator\Desktop\20211101-GAT-JXFSS.eds
Experiment Run End Time	Not Started
Instrument Type	sds7500
Passive Reference	ROX
Well	Cycle	SYBR	ROX
A1	1	81343.9	193814
A2	1	111640	234843
A3	1	45782.3	229083
A4	1	30869	214001
A5	1	29067.1	226242
A6	1	32554.2	231901
A7	1	29503	205386
A8	1	36418.5	202461
A9	1
A10	1	36293.3	192603
A11	1
A12	1
B1	1	61418.6	198439
B2	1	41812.5	222605
B3	1	42058.2	214650
B4	1	30113.7	226746
B5	1	28178.5	214850
B6	1	24236.8	222980
B7	1	29079	211125
B8	1	30267	226359
B9	1
B10	1	25235.3	197523
B11	1
B12	1
C1	1	152407	259713
C2	1	42828.8	241465
C3	1	29239	233104
C4	1	71617.6	266952
C5	1	24182.6	250592
C6	1	25240.3	243559
C7	1	86307.4	219156
C8	1	40680.4	230050
C9	1
C10	1	25957.5	207061
C11	1
C12	1
D1	1	31884.2	217525
D2	1	33104.8	216519
D3	1	32324.6	215838
D4	1	55456.9	229704
D5	1	21175.3	216463
D6	1	25340.6	222801
D7	1	22962.1	219838
D8	1	25834	222412
D9	1
D10	1	46454.8	222372
D11	1
D12	1
E1	1	46542.6	222394
E2	1	33904.7	218450
E3	1	39841.6	214912
E4	1	27328	230049
E5	1	42539.9	237039
E6	1	21533.6	223722
E7	1	25266.5	216845
E8	1	26414.2	211648
E9	1
E10	1	26875.4	215513
E11	1
E12	1
F1	1	110726	221682
F2	1	27279.6	219645
F3	1	23879.9	208597
F4	1	29848.9	213062
F5	1	69477	240181
F6	1	53829.6	216852
F7	1	24165	225477
F8	1	29019.9	212899
F9	1
F10	1	31714.2	214542
F11	1
F12	1
G1	1	55066.6	198872
G2	1	39803.3	206060
G3	1	25786.7	210730
G4	1	25765.8	213864
G5	1	30707.7	238914
G6	1	31052.9	225391
G7	1	26773.3	204865
G8	1	25721	229977
G9	1
G10	1	26522.3	227652
G11	1
G12	1
H1	1	63795.1	196134
H2	1	31460.1	195012
H3	1	27199.4	191556
H4	1	28684.7	206288
H5	1	31902.9	214965
H6	1	30094.7	209432
H7	1	34011.5	218242
H8	1	67881.7	218694
H9	1
H10	1	36356.5	226933
H11	1
H12	1
A1	2	80642.2	199579
A2	2	111071	242402
A3	2	45389.2	237708
A4	2	30678.8	217578
A5	2	28740.4	231136
A6	2	32446.4	239991
A7	2	29933.8	212364
A8	2	36587.2	206851
A9	2
A10	2	36429.4	196946
A11	2
A12	2
B1	2	61372.8	203845
B2	2	42011.8	228951
B3	2	42330.8	221139
B4	2	29407.5	231104
B5	2	28165	219222
B6	2	24642.3	227929
B7	2	29466	217065
B8	2	31109.7	232012
B9	2
B10	2	25683.2	201886
B11	2
B12	2
C1	2	145258	265113
C2	2	43488.8	246706
C3	2	30152.5	240997
C4	2	70172.1	272395
C5	2	23924.7	254430
C6	2	25490.8	253073
C7	2	86817	225257
C8	2	41243.9	233660
C9	2
C10	2	26685.9	213414
C11	2
C12	2
D1	2	32291.5	222597
D2	2	33288.5	220708
D3	2	32988.7	221261
D4	2	55372.9	234099
D5	2	21247.1	219669
D6	2	25707	229634
D7	2	23501.2	223525
D8	2	26110.5	225956
D9	2
D10	2	45289.2	226113
D11	2
D12	2
E1	2	46583.9	228136
E2	2	34534.6	223694
E3	2	40396.8	221925
E4	2	28076.7	236783
E5	2	42690.3	242342
E6	2	21508.6	231466
E7	2	25323.5	222833
E8	2	26740.3	215763
E9	2
E10	2	26851.6	219495
E11	2
E12	2
F1	2	109060	226137
F2	2	27357.9	224007
F3	2	24473.6	214432
F4	2	29508.7	216204
F5	2	71038.9	244392
F6	2	55386.6	222733
F7	2	24209.8	229688
F8	2	29357.8	215990
F9	2
F10	2	32428.8	219485
F11	2
F12	2
G1	2	55173.8	202850
G2	2	40999.7	211373
G3	2	26136.7	217856
G4	2	26496.3	218852
G5	2	30673.2	242793
G6	2	32003.4	231738
G7	2	27337.5	210280
G8	2	26052.5	235019
G9	2
G10	2	27299.5	234282
G11	2
G12	2
H1	2	64094.1	200831
H2	2	31398	201094
H3	2	27815.4	198225
H4	2	28412.4	209882
H5	2	32305.3	218596
H6	2	30677.3	215815
H7	2	34548.7	225284
H8	2	68005.5	223720
H9	2
H10	2	36131.1	233673
H11	2
H12	2
A1	3	79621.2	201210
A2	3	108824	242675
A3	3	44524.6	238505
A4	3	29791.7	217504
A5	3	28344.7	231364
A6	3	32299.3	241623
A7	3	30052.3	213322
A8	3	36795.4	206672
A9	3
A10	3	36554.9	197597
A11	3
A12	3
B1	3	61376.2	205457
B2	3	42617.7	229895
B3	3	42321.7	221831
B4	3	29082.4	230738
B5	3	28325.2	218657
B6	3	24510.5	228809
B7	3	29500.2	218261
B8	3	31318.4	232471
B9	3
B10	3	25334.4	202502
B11	3
B12	3
C1	3	141082	265181
C2	3	43617.9	246667
C3	3	30125.1	241963
C4	3	69710.7	272913
C5	3	24109.3	254891
C6	3	25737.2	255195
C7	3	85512.9	225468
C8	3	41579.1	233770
C9	3
C10	3	26920.7	214743
C11	3
C12	3
D1	3	32690.9	224005
D2	3	33506.5	219531
D3	3	33153.6	221816
D4	3	54838.7	233773
D5	3	21395	220444
D6	3	25981.3	230665
D7	3	24447.1	223834
D8	3	26373.1	227064
D9	3
D10	3	44120.6	226459
D11	3
D12	3
E1	3	46145.7	229485
E2	3	34695	224369
E3	3	40627.5	223414
E4	3	28182.6	237580
E5	3	43035.5	244183
E6	3	21913	233540
E7	3	25278.1	223976
E8	3	26635	217567
E9	3
E10	3	27081.2	220861
E11	3
E12	3
F1	3	106678	226880
F2	3	28441.6	224282
F3	3	24375.3	215649
F4	3	29346	216746
F5	3	70050.8	244658
F6	3	55059.1	224045
F7	3	24478.4	230749
F8	3	28809.7	216618
F9	3
F10	3	33512.1	220826
F11	3
F12	3
G1	3	55201.3	205040
G2	3	41326.5	213388
G3	3	26997.3	218790
G4	3	26236.5	219767
G5	3	31005.1	243889
G6	3	32294.7	233142
G7	3	27510.9	211757
G8	3	26055.5	236360
G9	3
G10	3	27394.9	235811
G11	3
G12	3
H1	3	63776.3	202849
H2	3	31724.4	203114
H3	3	27825.2	200989
H4	3	28389.8	210496
H5	3	32091.3	219972
H6	3	30636.2	217911
H7	3	34661.3	227072
H8	3	67516.3	225609
H9	3
H10	3	35707.4	235720
H11	3
H12	3
A1	4	78900.7	201398
A2	4	108417	243184
A3	4	43788.4	238723
A4	4	29939.6	217322
A5	4	28103.3	231129
A6	4	32213.1	242136
A7	4	30033.1	213237
A8	4	37221.6	207151
A9	4
A10	4	36190.5	197364
A11	4
A12	4
B1	4	60776.4	205060
B2	4	42230.8	229516
B3	4	42270.2	221818
B4	4	28829.8	230356
B5	4	28200.2	218430
B6	4	24652.9	228628
B7	4	29974.4	217593
B8	4	31754.9	232633
B9	4
B10	4	25570.2	202536
B11	4
B12	4
C1	4	136757	264567
C2	4	43577.3	246398
C3	4	29978.1	241488
C4	4	68600.5	272027
C5	4	24199.1	253840
C6	4	25589.4	254776
C7	4	85112.6	224794
C8	4	41240	232911
C9	4
C10	4	26894.8	214544
C11	4
C12	4
D1	4	32919.5	223657
D2	4	33400.6	219199
D3	4	33032.6	221925
D4	4	53889.6	233214
D5	4	21069.6	219104
D6	4	25824.8	229998
D7	4	24906.1	223342
D8	4	26734.1	225818
D9	4
D10	4	43105.6	225936
D11	4
D12	4
E1	4	45765.4	230134
E2	4	34761.4	224368
E3	4	40038.5	222769
E4	4	28046.3	236894
E5	4	42830	243282
E6	4	22021.4	232822
E7	4	25614.7	223771
E8	4	26840	217790
E9	4
E10	4	27385.9	220742
E11	4
E12	4
F1	4	104702	226420
F2	4	28124.4	224392
F3	4	24342.8	215677
F4	4	28894	215316
F5	4	68895.6	243377
F6	4	54633.9	222442
F7	4	24783.1	229474
F8	4	29001.7	216107
F9	4
F10	4	32654.5	221151
F11	4
F12	4
G1	4	55949.7	205994
G2	4	43990	213856
G3	4	27003.5	219017
G4	4	26435.7	219909
G5	4	31078.5	243179
G6	4	32369.6	232720
G7	4	27756.3	210615
G8	4	26583.9	236833
G9	4
G10	4	27289.7	236369
G11	4
G12	4
H1	4	63973.6	203617
H2	4	31947.8	203730
H3	4	28115.1	202265
H4	4	28199.2	211091
H5	4	32558.1	220143
H6	4	30421.8	219032
H7	4	34537.9	227989
H8	4	66925.5	226802
H9	4
H10	4	35575.1	236802
H11	4
H12	4
A1	5	78100.4	200140
A2	5	106881	241538
A3	5	43434.8	237169
A4	5	29283.6	216436
A5	5	27671	230581
A6	5	32241.7	241159
A7	5	29922	213088
A8	5	36958	206540
A9	5
A10	5	35760.9	197476
A11	5
A12	5
B1	5	60331.4	204137
B2	5	42178.1	229146
B3	5	41971.5	220932
B4	5	28476.6	229244
B5	5	27987.2	217373
B6	5	24547.1	228697
B7	5	30056.5	217096
B8	5	31777	232003
B9	5
B10	5	25553.1	202424
B11	5
B12	5
C1	5	133321	263055
C2	5	43678.7	245933
C3	5	30410.4	240597
C4	5	67774.2	271124
C5	5	24324.5	252573
C6	5	25774.1	254247
C7	5	83912.1	224113
C8	5	41183.5	232308
C9	5
C10	5	27279.4	214321
C11	5
C12	5
D1	5	32904.3	223123
D2	5	33528	219479
D3	5	33117	221160
D4	5	53572.6	232336
D5	5	21367.7	218152
D6	5	26328.2	229347
D7	5	23968.4	222336
D8	5	27005.1	225685
D9	5
D10	5	41903.6	225504
D11	5
D12	5
E1	5	45164.1	229279
E2	5	34579.8	223771
E3	5	40518.1	223264
E4	5	28138.7	235799
E5	5	42169	242078
E6	5	21898.2	232089
E7	5	25439.9	222994
E8	5	26809.7	216887
E9	5
E10	5	27405.7	221208
E11	5
E12	5
F1	5	103564	226292
F2	5	28488.5	224928
F3	5	25057.6	215302
F4	5	29090.9	214537
F5	5	66643.2	242746
F6	5	54091.2	222430
F7	5	24729.4	228930
F8	5	29079.1	215445
F9	5
F10	5	32911.1	220887
F11	5
F12	5
G1	5	55567.4	205674
G2	5	44603.8	213453
G3	5	27121.3	218318
G4	5	26621.1	219260
G5	5	31141.2	242547
G6	5	32691.9	232476
G7	5	28221.3	210751
G8	5	26794.2	237096
G9	5
G10	5	27817.7	236019
G11	5
G12	5
H1	5	63861.2	204066
H2	5	31872	204343
H3	5	28252.1	202522
H4	5	28206.4	210970
H5	5	32106.9	220260
H6	5	30536.5	218810
H7	5	34651.4	227938
H8	5	65717	226290
H9	5
H10	5	35829	238137
H11	5
H12	5
A1	6	77415.6	200265
A2	6	106614	241237
A3	6	42939.1	236983
A4	6	29184	215761
A5	6	27860.7	230338
A6	6	31710.5	240807
A7	6	30313.8	212571
A8	6	36887.6	206109
A9	6
A10	6	36100.1	197250
A11	6
A12	6
B1	6	60235.9	204041
B2	6	42482.4	228781
B3	6	42069.9	221061
B4	6	28294.3	228743
B5	6	27769.4	216845
B6	6	24596.8	227965
B7	6	29989	216620
B8	6	32127	231668
B9	6
B10	6	25962.8	202504
B11	6
B12	6
C1	6	130879	262517
C2	6	43645.8	245530
C3	6	30403	239936
C4	6	67689.2	270748
C5	6	23866.4	251627
C6	6	25865.6	253243
C7	6	83546.9	223728
C8	6	41265.3	231423
C9	6
C10	6	27346.9	214192
C11	6
C12	6
D1	6	32770.7	223053
D2	6	33944.6	218071
D3	6	32966.4	220794
D4	6	53491.6	230886
D5	6	21554.6	217490
D6	6	26454.7	228528
D7	6	24199.6	221960
D8	6	26749.2	225075
D9	6
D10	6	41269.8	225289
D11	6
D12	6
E1	6	45020.7	228765
E2	6	35037	222917
E3	6	40654.3	222081
E4	6	28312.6	234976
E5	6	41912.7	241525
E6	6	22238.5	231312
E7	6	25414.1	222335
E8	6	26907	215986
E9	6
E10	6	28157.7	220581
E11	6
E12	6
F1	6	103112	226365
F2	6	28371.8	223146
F3	6	24597.7	214905
F4	6	28779.7	214143
F5	6	65849.6	241952
F6	6	53663.9	221106
F7	6	25063.1	228148
F8	6	28937.4	215090
F9	6
F10	6	32665.5	220850
F11	6
F12	6
G1	6	55553.4	205604
G2	6	42802.9	213159
G3	6	27877.7	218022
G4	6	26744.7	218497
G5	6	31473.5	241718
G6	6	32776.9	232116
G7	6	28403.1	210285
G8	6	26747	236577
G9	6
G10	6	28060.2	235503
G11	6
G12	6
H1	6	62829.2	205076
H2	6	32198	203892
H3	6	28189.3	202628
H4	6	28107.5	210693
H5	6	32850.6	219479
H6	6	30288.7	218984
H7	6	34526.2	227417
H8	6	65195.7	226627
H9	6
H10	6	35316.8	237898
H11	6
H12	6
A1	7	76985.4	199219
A2	7	105453	240877
A3	7	43104.1	236396
A4	7	29294.1	215359
A5	7	27973.2	229779
A6	7	31680.1	240829
A7	7	30267.6	211976
A8	7	37099.7	206065
A9	7
A10	7	35862.1	197370
A11	7
A12	7
B1	7	60152.8	203463
B2	7	42571.1	227921
B3	7	42073	220113
B4	7	28059.4	227919
B5	7	28031.2	216817
B6	7	24785.2	227678
B7	7	30170.8	216355
B8	7	32490.9	231166
B9	7
B10	7	25721.8	201548
B11	7
B12	7
C1	7	129017	261647
C2	7	43706.4	244750
C3	7	30555	239403
C4	7	66826.9	269730
C5	7	24283.5	250630
C6	7	25943.6	252375
C7	7	82994.4	222736
C8	7	41072	230834
C9	7
C10	7	27284.4	214201
C11	7
C12	7
D1	7	33422.1	221990
D2	7	33815.6	217122
D3	7	33296.4	219727
D4	7	53113.3	230735
D5	7	21655.5	216691
D6	7	26446.1	227313
D7	7	25137.8	221113
D8	7	26509.5	224632
D9	7
D10	7	40418.1	225093
D11	7
D12	7
E1	7	44874.4	227791
E2	7	35134.4	222585
E3	7	40665.5	222160
E4	7	28321.8	234174
E5	7	41883.1	240683
E6	7	22560.3	230513
E7	7	25463.6	221955
E8	7	26990.8	215933
E9	7
E10	7	27666.6	220419
E11	7
E12	7
F1	7	102593	226392
F2	7	28633.1	221921
F3	7	25283.1	213906
F4	7	28866.4	213032
F5	7	65027.2	240953
F6	7	53657.8	220671
F7	7	24970.9	227493
F8	7	28789.6	214325
F9	7
F10	7	33047.4	221289
F11	7
F12	7
G1	7	55702.8	205459
G2	7	44795.6	213372
G3	7	28092.6	218022
G4	7	26830.6	218579
G5	7	31325.4	240767
G6	7	32841.9	232170
G7	7	28691.4	209347
G8	7	27187.6	236646
G9	7
G10	7	28541.3	235681
G11	7
G12	7
H1	7	63280	205552
H2	7	32245.7	204042
H3	7	28567.4	202210
H4	7	28570.1	210075
H5	7	32883.2	219345
H6	7	30622.4	218567
H7	7	34529.2	227632
H8	7	64168.8	226261
H9	7
H10	7	35599.6	237749
H11	7
H12	7
A1	8	76964.6	199403
A2	8	105226	239477
A3	8	43007.9	236049
A4	8	29231.5	214742
A5	8	27781	229417
A6	8	31986.2	240025
A7	8	30147.9	212045
A8	8	36810.3	205777
A9	8
A10	8	35958.5	196819
A11	8
A12	8
B1	8	59790.3	202853
B2	8	42468.1	227526
B3	8	42234.3	219660
B4	8	27784.7	227125
B5	8	28292.2	216054
B6	8	24905.5	226909
B7	8	29937	215867
B8	8	32248.1	230554
B9	8
B10	8	25841.2	201722
B11	8
B12	8
C1	8	127474	260906
C2	8	44044.2	244272
C3	8	30831.6	238730
C4	8	66737	269291
C5	8	24372.4	249718
C6	8	26121.1	251727
C7	8	83156	222173
C8	8	41233.3	230553
C9	8
C10	8	27554.6	213800
C11	8
C12	8
D1	8	33592.5	221202
D2	8	34054.8	216891
D3	8	33229.5	219643
D4	8	53223.8	230404
D5	8	21817.7	216224
D6	8	26625.2	226543
D7	8	24099.4	220653
D8	8	27049	224257
D9	8
D10	8	39709.3	224392
D11	8
D12	8
E1	8	44368.5	227505
E2	8	35324.5	221622
E3	8	40519.5	220973
E4	8	28126.4	233086
E5	8	41929	239679
E6	8	22500	230600
E7	8	25390.4	221666
E8	8	27331.5	214962
E9	8
E10	8	27874.8	220550
E11	8
E12	8
F1	8	102055	224365
F2	8	28472.7	221347
F3	8	25379.6	213447
F4	8	28841.9	212006
F5	8	64249.8	240447
F6	8	53462.2	220315
F7	8	24997.7	226656
F8	8	29104.2	213899
F9	8
F10	8	32923.4	220591
F11	8
F12	8
G1	8	55888.4	204808
G2	8	44900.1	212439
G3	8	28643.4	217079
G4	8	26818.3	217870
G5	8	31726.7	240279
G6	8	33200.3	231241
G7	8	29152.8	209887
G8	8	27442.5	235837
G9	8
G10	8	28476.2	235511
G11	8
G12	8
H1	8	62718.6	203988
H2	8	32036.2	203346
H3	8	28363.5	202275
H4	8	28055.3	210115
H5	8	31792.7	218838
H6	8	30698	218413
H7	8	34283.3	227276
H8	8	63220.6	226121
H9	8
H10	8	35610.1	237688
H11	8
H12	8
A1	9	76471.8	199141
A2	9	104672	239803
A3	9	42950.8	235642
A4	9	29169.8	214160
A5	9	27769.3	228809
A6	9	31637.9	239756
A7	9	30003.6	211362
A8	9	36743.4	205644
A9	9
A10	9	36074.1	196603
A11	9
A12	9
B1	9	60001.6	203671
B2	9	42244.3	226843
B3	9	41988.1	219435
B4	9	27941.8	226430
B5	9	28267.2	215676
B6	9	24966.9	226719
B7	9	30206.4	215040
B8	9	32357.6	230061
B9	9
B10	9	25653.2	201566
B11	9
B12	9
C1	9	125296	259790
C2	9	43888.3	243878
C3	9	31096.9	238310
C4	9	66192.5	268134
C5	9	24621.1	249002
C6	9	26196.1	251008
C7	9	82641.2	221478
C8	9	40985.4	229132
C9	9
C10	9	27562.4	213666
C11	9
C12	9
D1	9	33517.1	221034
D2	9	34245.5	215851
D3	9	33566.4	219122
D4	9	53056.5	229367
D5	9	21906.8	215191
D6	9	26743.6	226230
D7	9	24480.3	219962
D8	9	26723.4	223617
D9	9
D10	9	38985.1	223832
D11	9
D12	9
E1	9	44534.7	227171
E2	9	35346.5	220988
E3	9	40549.3	219977
E4	9	28235.1	232604
E5	9	41661.9	238541
E6	9	22598.7	229423
E7	9	25393.5	221581
E8	9	27095.2	214820
E9	9
E10	9	27920.2	219947
E11	9
E12	9
F1	9	101431	223445
F2	9	28772.5	220440
F3	9	25296.9	212518
F4	9	28690.1	211371
F5	9	63561.5	239198
F6	9	53226.4	219424
F7	9	25622.1	225899
F8	9	28873.8	213396
F9	9
F10	9	33274.7	220684
F11	9
F12	9
G1	9	56025.1	204119
G2	9	44269.6	211607
G3	9	27874.9	216458
G4	9	27555.4	216716
G5	9	31174.3	239807
G6	9	32833.4	230738
G7	9	29396.6	209432
G8	9	27596.5	235664
G9	9
G10	9	28950.8	235411
G11	9
G12	9
H1	9	63403.4	202830
H2	9	32130.2	203233
H3	9	28574.3	201641
H4	9	27916	209642
H5	9	32554.2	218862
H6	9	30682	218617
H7	9	34801.7	227053
H8	9	63001.5	225868
H9	9
H10	9	35434.8	237772
H11	9
H12	9
A1	10	76295.9	198876
A2	10	104040	238621
A3	10	42549.2	235086
A4	10	29529.2	213854
A5	10	27528.4	228285
A6	10	31757.1	239024
A7	10	30095.7	210721
A8	10	37048.4	205074
A9	10
A10	10	36109	196681
A11	10
A12	10
B1	10	60247.5	201939
B2	10	42757.7	226550
B3	10	42091.6	219039
B4	10	27710.5	226229
B5	10	28132	215080
B6	10	25017.9	226609
B7	10	30604.1	214948
B8	10	32361.2	229854
B9	10
B10	10	26094.5	201326
B11	10
B12	10
C1	10	124590	258973
C2	10	43831.7	243285
C3	10	30808.2	237195
C4	10	66227.8	267214
C5	10	24427.2	248899
C6	10	26285.2	250794
C7	10	82494.1	221126
C8	10	41270.3	228773
C9	10
C10	10	27828.4	213651
C11	10
C12	10
D1	10	34447.8	220614
D2	10	34150.9	215969
D3	10	33289.5	217942
D4	10	53308.2	228335
D5	10	21835.2	215054
D6	10	27043.4	226022
D7	10	24639.2	219863
D8	10	27052	222907
D9	10
D10	10	38583.2	223637
D11	10
D12	10
E1	10	44779.5	226080
E2	10	35173.6	220576
E3	10	40738.6	220041
E4	10	28159.3	231841
E5	10	41822.8	237288
E6	10	22756	229647
E7	10	25476.1	220771
E8	10	26847.8	213897
E9	10
E10	10	28115.8	220528
E11	10
E12	10
F1	10	101394	221350
F2	10	29167.4	219489
F3	10	25414.8	212102
F4	10	28543.4	210132
F5	10	63060.8	238838
F6	10	53461.9	218667
F7	10	25351.9	226048
F8	10	29057.3	212729
F9	10
F10	10	33418.2	220649
F11	10
F12	10
G1	10	55223.4	203751
G2	10	44281.8	211184
G3	10	28721.3	216417
G4	10	27033.3	216031
G5	10	31520.8	239356
G6	10	32927.7	229983
G7	10	30576.7	208761
G8	10	29101.3	235418
G9	10
G10	10	29968.7	235125
G11	10
G12	10
H1	10	62640.5	203192
H2	10	32021.2	203098
H3	10	28593.8	201825
H4	10	28111.1	209151
H5	10	32048.1	218981
H6	10	30855.3	217937
H7	10	35346	226562
H8	10	63318.2	225683
H9	10
H10	10	35806.3	238068
H11	10
H12	10
A1	11	75980.2	198472
A2	11	104298	238472
A3	11	42401.7	234886
A4	11	29133.8	213814
A5	11	27626.1	227768
A6	11	31898.4	239058
A7	11	30339.4	210661
A8	11	37111.7	205077
A9	11
A10	11	36230.2	196725
A11	11
A12	11
B1	11	60142	201531
B2	11	42443.3	226318
B3	11	42518.2	218653
B4	11	27834.7	225405
B5	11	28169.4	214730
B6	11	25333.4	226012
B7	11	30706.8	215107
B8	11	32669.8	230175
B9	11
B10	11	26301.9	201932
B11	11
B12	11
C1	11	122492	258508
C2	11	44028.2	242754
C3	11	31263.6	237197
C4	11	65679.5	266550
C5	11	24353	248008
C6	11	26388.9	250301
C7	11	82665.1	220720
C8	11	41137.1	227648
C9	11
C10	11	27990.1	213370
C11	11
C12	11
D1	11	34427.1	220776
D2	11	34034.4	214901
D3	11	33796.2	217545
D4	11	53190.8	226921
D5	11	22170.9	213591
D6	11	27290.2	224990
D7	11	24503.4	218502
D8	11	27061.2	222206
D9	11
D10	11	38157.1	223481
D11	11
D12	11
E1	11	44864.9	225647
E2	11	35481.2	219696
E3	11	40937.5	218893
E4	11	28646.1	230150
E5	11	41604.7	236356
E6	11	23027	228210
E7	11	25762.9	219411
E8	11	27080.4	213647
E9	11
E10	11	27870.5	219714
E11	11
E12	11
F1	11	101021	220995
F2	11	28864.6	218679
F3	11	25625.9	211530
F4	11	29102	208578
F5	11	62820.3	238190
F6	11	53339.4	217909
F7	11	25485.8	225047
F8	11	29468.4	212389
F9	11
F10	11	33398.2	220033
F11	11
F12	11
G1	11	56292.5	203852
G2	11	45203.2	210854
G3	11	28323.2	216030
G4	11	27804.2	215887
G5	11	31821.3	238417
G6	11	33344.1	229567
G7	11	33199.8	209249
G8	11	30748.9	235276
G9	11
G10	11	31766.9	235638
G11	11
G12	11
H1	11	60952.9	201921
H2	11	32671	203403
H3	11	28415.6	201576
H4	11	28254.9	209044
H5	11	32212.1	219201
H6	11	30756.8	217952
H7	11	35974.7	226233
H8	11	63375.7	225390
H9	11
H10	11	36496.3	238019
H11	11
H12	11
A1	12	76782.6	197468
A2	12	104091	237988
A3	12	42673.9	234450
A4	12	29150.7	213219
A5	12	27715.1	227435
A6	12	31606.3	238131
A7	12	30650.9	209801
A8	12	36999.1	204676
A9	12
A10	12	36384.3	196595
A11	12
A12	12
B1	12	59939.9	200240
B2	12	42483.2	225697
B3	12	42229.7	218512
B4	12	27673.3	225007
B5	12	28301.8	213970
B6	12	25370.5	225609
B7	12	30666.3	214220
B8	12	32558.7	229801
B9	12
B10	12	26047.7	201336
B11	12
B12	12
C1	12	122453	257961
C2	12	44133.5	241880
C3	12	31229.1	235282
C4	12	65142.4	264955
C5	12	24574.5	246695
C6	12	26411.9	249704
C7	12	82165.5	219909
C8	12	41153.7	227355
C9	12
C10	12	27798.5	213412
C11	12
C12	12
D1	12	35018.2	219627
D2	12	34646.9	213967
D3	12	34088.9	217077
D4	12	52907.3	226505
D5	12	22301.2	212862
D6	12	27630.2	224984
D7	12	24432.2	218638
D8	12	27087.6	222011
D9	12
D10	12	37655.7	222880
D11	12
D12	12
E1	12	45501.7	224544
E2	12	35539.7	219020
E3	12	41543.2	218523
E4	12	28867	229542
E5	12	41655.6	235266
E6	12	23589.2	227896
E7	12	25699	219157
E8	12	27034.5	213490
E9	12
E10	12	27750.6	219712
E11	12
E12	12
F1	12	101311	220010
F2	12	29245.5	218112
F3	12	26145.1	210532
F4	12	28950.4	208375
F5	12	62350.8	237442
F6	12	53290	216983
F7	12	25690	224855
F8	12	29742.8	212101
F9	12
F10	12	33325.4	220215
F11	12
F12	12
G1	12	55917.4	202824
G2	12	45318.3	210101
G3	12	28468	215355
G4	12	27045.6	215132
G5	12	31655.5	237935
G6	12	33299	229092
G7	12	35177.4	207858
G8	12	34240.1	234737
G9	12
G10	12	35464.9	234495
G11	12
G12	12
H1	12	61789.8	201721
H2	12	32478	202561
H3	12	28804.3	201025
H4	12	28412.6	208248
H5	12	32015.2	218410
H6	12	30607.9	217832
H7	12	37733.2	226226
H8	12	65266.3	224831
H9	12
H10	12	38354.5	237630
H11	12
H12	12
A1	13	76342.4	197183
A2	13	103573	238047
A3	13	42754.4	233816
A4	13	29545.8	213277
A5	13	27766.2	227383
A6	13	31566.9	238123
A7	13	30829.2	209944
A8	13	37268.5	204264
A9	13
A10	13	36154.3	196505
A11	13
A12	13
B1	13	60209.7	200477
B2	13	42913.6	224994
B3	13	42507.7	217668
B4	13	27720	224654
B5	13	28605.4	213950
B6	13	25543.1	225465
B7	13	30842.9	214089
B8	13	32899.5	229394
B9	13
B10	13	26078.7	201604
B11	13
B12	13
C1	13	121582	256880
C2	13	44207.3	241251
C3	13	31221.1	235058
C4	13	64778.7	264537
C5	13	24772.7	245618
C6	13	26557.8	249174
C7	13	82115.7	219685
C8	13	41471.1	226941
C9	13
C10	13	27754.9	213081
C11	13
C12	13
D1	13	36721.6	218940
D2	13	34726.5	213541
D3	13	34649.2	216138
D4	13	53211.7	225571
D5	13	22699.6	211518
D6	13	28476.2	224134
D7	13	24519.5	217822
D8	13	26962.1	221463
D9	13
D10	13	37327.7	222519
D11	13
D12	13
E1	13	46233.3	223560
E2	13	35843	218181
E3	13	41670.1	217766
E4	13	28883.7	228720
E5	13	41565.4	234409
E6	13	24234.2	227155
E7	13	25882	218971
E8	13	26710.1	213055
E9	13
E10	13	27923.6	219911
E11	13
E12	13
F1	13	101448	220038
F2	13	29513.4	217472
F3	13	27010.5	210678
F4	13	29394.5	206838
F5	13	62700.6	235615
F6	13	53648.7	215994
F7	13	25767	223893
F8	13	29334.1	211853
F9	13
F10	13	33491.7	220212
F11	13
F12	13
G1	13	55684.3	202730
G2	13	45656.8	210410
G3	13	28881.9	215226
G4	13	27620.9	214804
G5	13	31815.2	237090
G6	13	33455.7	228965
G7	13	41147.5	207845
G8	13	40632.8	234953
G9	13
G10	13	41513.4	234636
G11	13
G12	13
H1	13	61302.8	201439
H2	13	32822.8	202025
H3	13	28831.2	200693
H4	13	27946.4	207687
H5	13	32588.4	218694
H6	13	30596.7	216928
H7	13	41768.6	226167
H8	13	68604.7	224959
H9	13
H10	13	41849.6	237089
H11	13
H12	13
A1	14	76541.9	196727
A2	14	103554	237431
A3	14	42327.8	233597
A4	14	29600.8	212771
A5	14	28067.7	226942
A6	14	32123.3	237907
A7	14	30807.7	209857
A8	14	37185.7	204028
A9	14
A10	14	36203.4	196338
A11	14
A12	14
B1	14	60422.1	200071
B2	14	42480.4	225106
B3	14	42513.4	217596
B4	14	27806.5	223505
B5	14	28457.4	213819
B6	14	25182.7	225058
B7	14	31223.2	214063
B8	14	33009.2	229231
B9	14
B10	14	26568.5	201041
B11	14
B12	14
C1	14	120772	255782
C2	14	43953.9	240625
C3	14	31444	234162
C4	14	64752.3	263430
C5	14	24789.2	244862
C6	14	26790.7	248563
C7	14	82135.2	219075
C8	14	41557.2	226709
C9	14
C10	14	28302.1	212766
C11	14
C12	14
D1	14	38340.2	217962
D2	14	35370.6	213201
D3	14	35906.2	215903
D4	14	54031.7	224352
D5	14	23293.2	210974
D6	14	29269.6	223601
D7	14	24940	217424
D8	14	27464	220669
D9	14
D10	14	36878.1	222591
D11	14
D12	14
E1	14	47684.4	222580
E2	14	35916.8	217482
E3	14	42256.8	217538
E4	14	29659.2	228182
E5	14	42267.8	232985
E6	14	25334	226454
E7	14	25651.4	218245
E8	14	27197.7	212590
E9	14
E10	14	27965.1	219379
E11	14
E12	14
F1	14	102889	218788
F2	14	30237.2	217409
F3	14	27586.7	209994
F4	14	29977.4	206672
F5	14	62470.6	234481
F6	14	54543.3	215531
F7	14	25965.3	223346
F8	14	29821.9	211327
F9	14
F10	14	33220.9	220227
F11	14
F12	14
G1	14	55767	202274
G2	14	46043.9	209490
G3	14	28700.6	214209
G4	14	28300.7	214061
G5	14	32051.2	236493
G6	14	33222	228940
G7	14	51475	207938
G8	14	52269.6	234080
G9	14
G10	14	52887.1	234050
G11	14
G12	14
H1	14	62302.1	200766
H2	14	32723.5	201204
H3	14	28809.3	200746
H4	14	28575.2	207393
H5	14	31831.8	217936
H6	14	30706.4	217300
H7	14	48168.3	225879
H8	14	74378.4	224370
H9	14
H10	14	48697.2	237922
H11	14
H12	14
A1	15	76731.4	196267
A2	15	103259	236383
A3	15	42482.3	233563
A4	15	29477	212987
A5	15	28123.8	226491
A6	15	31927.6	237085
A7	15	30945.6	209350
A8	15	37340	203909
A9	15
A10	15	36370.8	196001
A11	15
A12	15
B1	15	61492.6	199537
B2	15	43409.2	224161
B3	15	42780.4	216812
B4	15	27665.6	222981
B5	15	28489.9	213254
B6	15	25769.1	224746
B7	15	31575.9	213604
B8	15	33583.1	229102
B9	15
B10	15	26522.1	200913
B11	15
B12	15
C1	15	120945	254408
C2	15	44625.6	240363
C3	15	32059.8	233775
C4	15	64934	262956
C5	15	24979	244445
C6	15	27057.7	247796
C7	15	81992.4	218727
C8	15	41595	226233
C9	15
C10	15	28352.8	212411
C11	15
C12	15
D1	15	41158.3	218030
D2	15	35610.7	212732
D3	15	37070.1	215531
D4	15	54911.5	223884
D5	15	24243.2	210002
D6	15	31234.8	223178
D7	15	24951.8	217099
D8	15	27618.7	220192
D9	15
D10	15	36627.2	221625
D11	15
D12	15
E1	15	50696.2	222155
E2	15	37297.1	217181
E3	15	43948.4	216673
E4	15	31050.7	227474
E5	15	42921.6	232597
E6	15	27038.9	225851
E7	15	25651.3	217942
E8	15	27486.6	212114
E9	15
E10	15	28092	218996
E11	15
E12	15
F1	15	105840	218488
F2	15	30691.1	217086
F3	15	29250.6	209093
F4	15	31179.4	205419
F5	15	63655.3	233415
F6	15	56146.7	214863
F7	15	26169.7	222607
F8	15	29546.5	210260
F9	15
F10	15	33544.2	219946
F11	15
F12	15
G1	15	55945.6	201349
G2	15	45805.8	208908
G3	15	28592	213740
G4	15	27380.6	213255
G5	15	31942.9	235351
G6	15	33448	228657
G7	15	69694.9	207100
G8	15	71710	233726
G9	15
G10	15	72585.2	233803
G11	15
G12	15
H1	15	62903.1	200765
H2	15	32640.4	200763
H3	15	28505.2	200049
H4	15	28303.7	206923
H5	15	32621.9	217404
H6	15	30518.6	217395
H7	15	60472.6	224996
H8	15	86662.5	224443
H9	15
H10	15	61394.2	237461
H11	15
H12	15
A1	16	78609.4	195805
A2	16	103434	235939
A3	16	43390.9	232567
A4	16	29887.2	212850
A5	16	28691.7	227021
A6	16	32359	237197
A7	16	32413.2	209712
A8	16	37688	204077
A9	16
A10	16	36711.6	196215
A11	16
A12	16
B1	16	62892.8	199025
B2	16	43607.1	223863
B3	16	43589.6	216173
B4	16	28352.1	222007
B5	16	28748.8	213178
B6	16	26310.3	224477
B7	16	32577.6	213538
B8	16	34306.6	229215
B9	16
B10	16	26852.4	200730
B11	16
B12	16
C1	16	121830	254050
C2	16	44692.3	240087
C3	16	32660.1	233697
C4	16	65176.1	262360
C5	16	25652.5	243657
C6	16	27643.7	247325
C7	16	82406.6	218719
C8	16	42161.2	225892
C9	16
C10	16	28849.4	212378
C11	16
C12	16
D1	16	46022	217411
D2	16	37552.5	212628
D3	16	39698.7	214668
D4	16	56777.9	223296
D5	16	26072.6	209453
D6	16	34235	222318
D7	16	25440.3	216403
D8	16	27989.1	220042
D9	16
D10	16	36572.8	221730
D11	16
D12	16
E1	16	55786.8	221545
E2	16	38375.1	216424
E3	16	46776.7	216685
E4	16	33220.4	226949
E5	16	44962.6	231473
E6	16	30545	224951
E7	16	26781.4	217316
E8	16	27500.2	211363
E9	16
E10	16	28163.6	218781
E11	16
E12	16
F1	16	110273	217880
F2	16	32959.2	216631
F3	16	31935.3	208837
F4	16	33023.2	204470
F5	16	65015.9	233328
F6	16	58862.8	214494
F7	16	26704.3	221472
F8	16	30238.3	209814
F9	16
F10	16	33552.7	219630
F11	16
F12	16
G1	16	55979.2	201103
G2	16	45750.9	208988
G3	16	28614.4	213684
G4	16	27298	212789
G5	16	31931.5	235252
G6	16	33413.3	228177
G7	16	96710.6	207036
G8	16	101280	233340
G9	16
G10	16	102266	233763
G11	16
G12	16
H1	16	62231.4	200014
H2	16	32710.3	200516
H3	16	28673.9	199895
H4	16	28607.6	205896
H5	16	32214.2	217435
H6	16	31129.7	217157
H7	16	81840.5	224883
H8	16	105682	224076
H9	16
H10	16	81875.1	237479
H11	16
H12	16
A1	17	80811.2	194430
A2	17	103374	234743
A3	17	44081.1	232043
A4	17	30695.6	212095
A5	17	29139.5	226021
A6	17	33431	236739
A7	17	33889.2	209195
A8	17	38117.5	203192
A9	17
A10	17	37099.2	196144
A11	17
A12	17
B1	17	65604.7	198151
B2	17	43847.6	223389
B3	17	44700.6	216349
B4	17	28727.8	221074
B5	17	29325.5	212358
B6	17	27571.4	224043
B7	17	34396.1	213555
B8	17	35533.9	228601
B9	17
B10	17	27403.4	200238
B11	17
B12	17
C1	17	123941	252683
C2	17	45127.3	238672
C3	17	33613	233245
C4	17	65543.1	261691
C5	17	26250.5	243034
C6	17	28372.7	247058
C7	17	83912.4	217879
C8	17	43545.4	225435
C9	17
C10	17	29156.1	211903
C11	17
C12	17
D1	17	54769.9	217037
D2	17	39703.1	212012
D3	17	44202.3	214427
D4	17	60657.7	223133
D5	17	29025.6	209127
D6	17	39687.6	222046
D7	17	25962.1	216033
D8	17	28393.5	219336
D9	17
D10	17	36330.8	220975
D11	17
D12	17
E1	17	63674.4	221080
E2	17	40894.8	216400
E3	17	50786.1	216268
E4	17	36797.4	226554
E5	17	47708.1	231498
E6	17	35945.2	224720
E7	17	27349.8	217337
E8	17	28108	211084
E9	17
E10	17	28318.3	218943
E11	17
E12	17
F1	17	118426	217577
F2	17	35319.4	215950
F3	17	36286.6	208983
F4	17	35998.5	204781
F5	17	68093.4	232939
F6	17	64328.4	214131
F7	17	27493	221745
F8	17	30569	208973
F9	17
F10	17	33373.7	220106
F11	17
F12	17
G1	17	55583	200169
G2	17	45478.6	208325
G3	17	28781.7	212586
G4	17	27153.1	212473
G5	17	32238.8	233914
G6	17	33436.6	227806
G7	17	130515	206802
G8	17	138837	232684
G9	17
G10	17	139566	233468
G11	17
G12	17
H1	17	61124.9	198640
H2	17	32490	199321
H3	17	28705.4	199504
H4	17	28103.1	204954
H5	17	32249.5	216946
H6	17	31038.8	216282
H7	17	111952	224903
H8	17	134294	223689
H9	17
H10	17	112554	236999
H11	17
H12	17
A1	18	85385.7	194626
A2	18	104031	234753
A3	18	46045.6	232243
A4	18	31575.4	211765
A5	18	30445.1	226169
A6	18	35384.4	236712
A7	18	37018.7	208971
A8	18	39176.6	203382
A9	18
A10	18	37902.4	195693
A11	18
A12	18
B1	18	69949	198450
B2	18	44490.5	222748
B3	18	46793.8	216196
B4	18	30023.5	220808
B5	18	31076.6	211065
B6	18	29305.9	223755
B7	18	37711.7	213000
B8	18	37559.6	228615
B9	18
B10	18	28289.7	199920
B11	18
B12	18
C1	18	130059	252687
C2	18	46130.1	238637
C3	18	35712	232944
C4	18	67029.2	261689
C5	18	27802.2	242751
C6	18	30844.7	246535
C7	18	86346.3	217468
C8	18	45708.7	225045
C9	18
C10	18	30340.1	211889
C11	18
C12	18
D1	18	67314.3	216504
D2	18	44195.5	211613
D3	18	52180.9	213972
D4	18	66729.6	222720
D5	18	33718.7	208852
D6	18	48523.2	221136
D7	18	28008.4	215817
D8	18	30064.4	218937
D9	18
D10	18	36903.5	221048
D11	18
D12	18
E1	18	76305.7	221132
E2	18	45462.9	216433
E3	18	58051.5	216044
E4	18	42895.5	226118
E5	18	53104.6	230642
E6	18	44945.6	223713
E7	18	28986.1	217023
E8	18	29663.2	211006
E9	18
E10	18	28728.2	218343
E11	18
E12	18
F1	18	129386	217553
F2	18	39835.4	216099
F3	18	43270.4	209010
F4	18	42095.4	203979
F5	18	73905.1	232095
F6	18	72534.9	214164
F7	18	28963	220978
F8	18	32216	208716
F9	18
F10	18	34122.2	219295
F11	18
F12	18
G1	18	56599.7	199049
G2	18	45444.6	207892
G3	18	28820.3	212429
G4	18	27901.3	211863
G5	18	32293.6	233407
G6	18	33889.6	227526
G7	18	164328	206928
G8	18	176168	232820
G9	18
G10	18	176104	233194
G11	18
G12	18
H1	18	62574.9	198587
H2	18	33038.2	199579
H3	18	28769.4	198709
H4	18	28841.1	205017
H5	18	32755.8	216840
H6	18	31185.1	216114
H7	18	148568	224370
H8	18	169971	223403
H9	18
H10	18	149702	236573
H11	18
H12	18
A1	19	94287.7	194127
A2	19	105253	233796
A3	19	49883.8	231116
A4	19	34321.6	211072
A5	19	33002.9	225470
A6	19	38878.7	236661
A7	19	42840.1	208928
A8	19	41433.6	202875
A9	19
A10	19	40132.7	195975
A11	19
A12	19
B1	19	79821.1	198039
B2	19	46044.9	222540
B3	19	50481.8	215502
B4	19	32210.3	219579
B5	19	33923	211304
B6	19	32753.5	223506
B7	19	43742.5	212713
B8	19	41500.2	228241
B9	19
B10	19	30007.4	199869
B11	19
B12	19
C1	19	141415	252345
C2	19	48283.5	238401
C3	19	39726.8	232728
C4	19	69499.8	261053
C5	19	30449.5	241972
C6	19	34562.2	246196
C7	19	91999.2	216504
C8	19	49679.9	224371
C9	19
C10	19	32096.5	211636
C11	19
C12	19
D1	19	85189.2	216499
D2	19	50776.1	211569
D3	19	63723.6	214019
D4	19	76846	222228
D5	19	42220.8	208091
D6	19	62289.8	220624
D7	19	30700.5	214845
D8	19	32607.6	218528
D9	19
D10	19	36877.5	220735
D11	19
D12	19
E1	19	94522.2	220611
E2	19	52233.6	215812
E3	19	69537	215574
E4	19	52676.2	225459
E5	19	62197.1	230339
E6	19	59193.1	223200
E7	19	31925.2	216010
E8	19	32149.5	210475
E9	19
E10	19	29620.9	218094
E11	19
E12	19
F1	19	147083	217177
F2	19	46775.9	215341
F3	19	54556.4	207754
F4	19	50670.1	203741
F5	19	82863.9	231542
F6	19	85338.8	213244
F7	19	32275.5	220866
F8	19	35230.9	208091
F9	19
F10	19	34469.9	218849
F11	19
F12	19
G1	19	55343	199367
G2	19	45854.9	207448
G3	19	28629.4	211876
G4	19	27767.4	211463
G5	19	32522.1	232935
G6	19	34260.9	226770
G7	19	191418	205969
G8	19	206748	232451
G9	19
G10	19	207084	232809
G11	19
G12	19
H1	19	61658.8	197809
H2	19	32778	198909
H3	19	28736.4	198236
H4	19	28591.4	204503
H5	19	32642.3	216271
H6	19	31384.1	216279
H7	19	184122	224241
H8	19	204125	223225
H9	19
H10	19	186012	236878
H11	19
H12	19
A1	20	109569	193818
A2	20	107680	232902
A3	20	57717.6	230997
A4	20	38292	210835
A5	20	37878.8	224696
A6	20	45662.5	236562
A7	20	54481.5	208408
A8	20	45442.9	202725
A9	20
A10	20	42977.1	195282
A11	20
A12	20
B1	20	95832.9	197328
B2	20	48935.1	222414
B3	20	57780.8	215195
B4	20	37077.9	219385
B5	20	38320.6	210241
B6	20	39118.2	222950
B7	20	54901	212219
B8	20	48913.9	228199
B9	20
B10	20	33720.2	199980
B11	20
B12	20
C1	20	161175	252051
C2	20	51274.2	237860
C3	20	47759	232290
C4	20	75706.3	260791
C5	20	35991.7	241696
C6	20	41823.5	246023
C7	20	103049	216334
C8	20	57575	224143
C9	20
C10	20	36060.7	211362
C11	20
C12	20
D1	20	107509	215882
D2	20	61797.2	211062
D3	20	80684.6	213579
D4	20	91380.1	222195
D5	20	54443.4	207731
D6	20	81425.7	220390
D7	20	36470.4	214618
D8	20	37530.3	218205
D9	20
D10	20	37479.9	220230
D11	20
D12	20
E1	20	117264	220191
E2	20	62880.6	215841
E3	20	85897.8	215398
E4	20	67235.5	225680
E5	20	75968	230784
E6	20	79046.2	223052
E7	20	37146.8	216240
E8	20	36645.9	210280
E9	20
E10	20	30111.7	218211
E11	20
E12	20
F1	20	168756	216703
F2	20	57301.4	215233
F3	20	70415.5	207749
F4	20	63958.9	203694
F5	20	96927.4	231256
F6	20	103661	213080
F7	20	37310.1	220748
F8	20	40208.4	208064
F9	20
F10	20	35746.9	218551
F11	20
F12	20
G1	20	55004.4	199188
G2	20	45763.5	207236
G3	20	29001.6	211859
G4	20	28605.6	211074
G5	20	32648.9	232973
G6	20	34657.1	226485
G7	20	211431	205885
G8	20	228696	232053
G9	20
G10	20	229675	232380
G11	20
G12	20
H1	20	62282.1	197321
H2	20	32556.1	198263
H3	20	28828.2	197587
H4	20	28885.3	203638
H5	20	32869.6	215322
H6	20	31545	216105
H7	20	212085	223922
H8	20	231676	222822
H9	20
H10	20	215491	236386
H11	20
H12	20
A1	21	131563	193049
A2	21	113369	233052
A3	21	70813.6	230843
A4	21	47268.5	210346
A5	21	47544.9	224555
A6	21	57520.1	236059
A7	21	72506.2	208718
A8	21	52638.1	203112
A9	21
A10	21	48943.2	195599
A11	21
A12	21
B1	21	118547	197253
B2	21	55039	221821
B3	21	70522.3	215293
B4	21	46144.9	219156
B5	21	46996	210196
B6	21	50851	222415
B7	21	74587.4	211965
B8	21	62377.3	227384
B9	21
B10	21	39947	199531
B11	21
B12	21
C1	21	190046	250792
C2	21	57775.3	238109
C3	21	61271.8	231871
C4	21	86122.6	259960
C5	21	45966.4	241424
C6	21	55416.6	245317
C7	21	122273	215937
C8	21	71237.7	223787
C9	21
C10	21	42710.8	211049
C11	21
C12	21
D1	21	132536	215502
D2	21	77366.3	210902
D3	21	102266	213633
D4	21	111199	221503
D5	21	72985.3	207220
D6	21	105107	219543
D7	21	46281.6	214427
D8	21	46695.4	217652
D9	21
D10	21	39220.2	219362
D11	21
D12	21
E1	21	142864	220286
E2	21	78683.4	215199
E3	21	107279	215210
E4	21	88174.8	225267
E5	21	95503.1	229639
E6	21	103514	222176
E7	21	47180.6	215331
E8	21	45358.2	209901
E9	21
E10	21	32285.5	217743
E11	21
E12	21
F1	21	192093	216447
F2	21	73830.9	215196
F3	21	91777.4	207217
F4	21	82100.5	202545
F5	21	116490	230991
F6	21	126517	212266
F7	21	47990.1	220153
F8	21	49866.8	207070
F9	21
F10	21	37777	218188
F11	21
F12	21
G1	21	55823.4	198708
[truncated: 11,063 more rows]

## Sheet: Amplification Data
Block Type	96alum
Chemistry	SYBR_GREEN
Experiment File Name	C:\Users\Administrator\Desktop\20211101-GAT-JXFSS.eds
Experiment Run End Time	Not Started
Instrument Type	sds7500
Passive Reference	ROX
Well	Cycle	Target Name	Rn	ΔRn
A1	1	AXL	0.419701	0.0279974
A1	2	AXL	0.404061	0.0128931
A1	3	AXL	0.395712	0.00507989
A1	4	AXL	0.391765	0.00166821
A1	5	AXL	0.390229	0.000668571
A1	6	AXL	0.386566	-0.00245892
A1	7	AXL	0.386435	-0.00205394
A1	8	AXL	0.385976	-0.00197801
A1	9	AXL	0.384008	-0.0034099
A1	10	AXL	0.383635	-0.00324727
A1	11	AXL	0.382826	-0.00352078
A1	12	AXL	0.388835	0.00302449
A1	13	AXL	0.387166	0.00189096
A1	14	AXL	0.389076	0.00433671
A1	15	AXL	0.390954	0.00675036
A1	16	AXL	0.401468	0.0178005
A1	17	AXL	0.415632	0.0324999
A1	18	AXL	0.438717	0.0561211
A1	19	AXL	0.4857	0.10364
A1	20	AXL	0.56532	0.183796
A1	21	AXL	0.681502	0.300513
A1	22	AXL	0.823288	0.442835
A1	23	AXL	0.965757	0.58584
A1	24	AXL	1.08352	0.704141
A1	25	AXL	1.17206	0.793214
A1	26	AXL	1.23739	0.859077
A1	27	AXL	1.27955	0.901774
A1	28	AXL	1.31179	0.934547
A1	29	AXL	1.33662	0.95992
A1	30	AXL	1.36192	0.985753
A1	31	AXL	1.36856	0.992926
A1	32	AXL	1.38654	1.01144
A1	33	AXL	1.39591	1.02135
A1	34	AXL	1.40173	1.0277
A1	35	AXL	1.406	1.03251
A1	36	AXL	1.40841	1.03546
A1	37	AXL	1.41273	1.04031
A1	38	AXL	1.41048	1.0386
A1	39	AXL	1.41215	1.04081
A1	40	AXL	1.41244	1.04163
A1	41	AXL	1.41082	1.04055
A1	42	AXL	1.41251	1.04277
A1	43	AXL	1.41284	1.04364
A1	44	AXL	1.40726	1.03859
A1	45	AXL	1.41294	1.04481
A2	1	AXL	0.475383	0.0320346
A2	2	AXL	0.458209	0.0152586
A2	3	AXL	0.448434	0.00588138
A2	4	AXL	0.445825	0.00367034
A2	5	AXL	0.442503	0.000746038
A2	6	AXL	0.441948	0.000588404
A2	7	AXL	0.437787	-0.00317492
A2	8	AXL	0.439399	-0.00116491
A2	9	AXL	0.436492	-0.0036747
A2	10	AXL	0.436005	-0.00376337
A2	11	AXL	0.43736	-0.00201151
A2	12	AXL	0.437381	-0.00159232
A2	13	AXL	0.435096	-0.00347935
A2	14	AXL	0.436142	-0.00203618
A2	15	AXL	0.436831	-0.000948942
A2	16	AXL	0.438395	0.00101246
A2	17	AXL	0.44037	0.00338546
A2	18	AXL	0.443149	0.00656211
A2	19	AXL	0.450193	0.0140036
A2	20	AXL	0.462338	0.0265464
A2	21	AXL	0.486455	0.0510606
A2	22	AXL	0.528353	0.0933571
A2	23	AXL	0.604917	0.170318
A2	24	AXL	0.71408	0.279879
A2	25	AXL	0.853261	0.419457
A2	26	AXL	0.986467	0.553061
A2	27	AXL	1.10176	0.668751
A2	28	AXL	1.18252	0.749915
A2	29	AXL	1.23949	0.807281
A2	30	AXL	1.28996	0.858142
A2	31	AXL	1.31819	0.886771
A2	32	AXL	1.34227	0.911256
A2	33	AXL	1.36762	0.936995
A2	34	AXL	1.37453	0.944307
A2	35	AXL	1.38533	0.955504
A2	36	AXL	1.39149	0.962065
A2	37	AXL	1.39871	0.969676
A2	38	AXL	1.39449	0.965862
A2	39	AXL	1.39889	0.970654
A2	40	AXL	1.4039	0.976061
A2	41	AXL	1.39593	0.968489
A2	42	AXL	1.39533	0.968286
A2	43	AXL	1.39447	0.967828
A2	44	AXL	1.39566	0.969416
A2	45	AXL	1.39768	0.971826
A3	1	AXL	0.19985	0.0178277
A3	2	AXL	0.190945	0.0087975
A3	3	AXL	0.186682	0.00440849
A3	4	AXL	0.183428	0.0010293
A3	5	AXL	0.183139	0.00061458
A3	6	AXL	0.18119	-0.00145913
A3	7	AXL	0.182338	-0.000436724
A3	8	AXL	0.182199	-0.000701002
A3	9	AXL	0.182271	-0.000754235
A3	10	AXL	0.180994	-0.00215668
A3	11	AXL	0.18052	-0.00275637
A3	12	AXL	0.182017	-0.00138442
A3	13	AXL	0.182855	-0.000672228
A3	14	AXL	0.1812	-0.0024528
A3	15	AXL	0.181888	-0.00188995
A3	16	AXL	0.186574	0.00267022
A3	17	AXL	0.18997	0.00594096
A3	18	AXL	0.198265	0.0141108
A3	19	AXL	0.215839	0.0315595
A3	20	AXL	0.249863	0.065458
A3	21	AXL	0.306761	0.122231
A3	22	AXL	0.404533	0.219878
A3	23	AXL	0.535174	0.350393
A3	24	AXL	0.687453	0.502546
A3	25	AXL	0.830539	0.645507
A3	26	AXL	0.945341	0.760184
A3	27	AXL	1.02686	0.841581
A3	28	AXL	1.08445	0.899044
A3	29	AXL	1.12353	0.938
A3	30	AXL	1.15973	0.974073
A3	31	AXL	1.18141	0.995624
A3	32	AXL	1.20072	1.01481
A3	33	AXL	1.21244	1.02641
A3	34	AXL	1.22408	1.03792
A3	35	AXL	1.22987	1.04358
A3	36	AXL	1.23271	1.04629
A3	37	AXL	1.2371	1.05056
A3	38	AXL	1.23887	1.05221
A3	39	AXL	1.23491	1.04812
A3	40	AXL	1.23897	1.05206
A3	41	AXL	1.23558	1.04854
A3	42	AXL	1.23878	1.05161
A3	43	AXL	1.23467	1.04738
A3	44	AXL	1.23703	1.04962
A3	45	AXL	1.23568	1.04814
A4	1	AXL	0.144247	0.010052
A4	2	AXL	0.141001	0.00641376
A4	3	AXL	0.136971	0.00199126
A4	4	AXL	0.137766	0.00239393
A4	5	AXL	0.135299	-0.00046536
A4	6	AXL	0.135261	-0.000896405
A4	7	AXL	0.136025	-0.000524501
A4	8	AXL	0.136124	-0.000818157
A4	9	AXL	0.136205	-0.00112868
A4	10	AXL	0.138081	0.000354327
A4	11	AXL	0.136258	-0.00186127
A4	12	AXL	0.136717	-0.00179437
A4	13	AXL	0.138533	-0.000370866
A4	14	AXL	0.139121	-0.000175362
A4	15	AXL	0.138398	-0.00129043
A4	16	AXL	0.140414	0.000333469
A4	17	AXL	0.144726	0.00425242
A4	18	AXL	0.149106	0.00824019
A4	19	AXL	0.162606	0.0213481
A4	20	AXL	0.18162	0.03997
A4	21	AXL	0.224718	0.082675
A4	22	AXL	0.29637	0.153934
A4	23	AXL	0.405759	0.262932
A4	24	AXL	0.550667	0.407447
A4	25	AXL	0.707994	0.564382
A4	26	AXL	0.841136	0.697131
A4	27	AXL	0.947282	0.802884
A4	28	AXL	1.02253	0.877745
A4	29	AXL	1.07143	0.926247
A4	30	AXL	1.11465	0.969073
A4	31	AXL	1.14114	0.99517
A4	32	AXL	1.1668	1.02044
A4	33	AXL	1.18259	1.03583
A4	34	AXL	1.19192	1.04478
A4	35	AXL	1.20199	1.05445
A4	36	AXL	1.2078	1.05987
A4	37	AXL	1.21173	1.06341
A4	38	AXL	1.2125	1.06379
A4	39	AXL	1.21177	1.06266
A4	40	AXL	1.21355	1.06405
A4	41	AXL	1.21016	1.06027
A4	42	AXL	1.21341	1.06313
A4	43	AXL	1.20693	1.05626
A4	44	AXL	1.21282	1.06175
A4	45	AXL	1.21237	1.06091
A5	1	AXL	0.128478	0.00939585
A5	2	AXL	0.124344	0.0048766
A5	3	AXL	0.122511	0.00265845
A5	4	AXL	0.121592	0.00135327
A5	5	AXL	0.120006	-0.000618338
A5	6	AXL	0.120955	-5.38422e-05
A5	7	AXL	0.12174	0.000344818
A5	8	AXL	0.121094	-0.000686377
A5	9	AXL	0.121364	-0.000801532
A5	10	AXL	0.120588	-0.00196353
A5	11	AXL	0.121291	-0.0016458
A5	12	AXL	0.12186	-0.00146259
A5	13	AXL	0.122112	-0.00159587
A5	14	AXL	0.123678	-0.000415313
A5	15	AXL	0.124171	-0.000307136
A5	16	AXL	0.126383	0.00151923
A5	17	AXL	0.128924	0.00367457
A5	18	AXL	0.134612	0.00897728
A5	19	AXL	0.146374	0.0203531
A5	20	AXL	0.168578	0.0421717
A5	21	AXL	0.211729	0.0849377
A5	22	AXL	0.28303	0.155853
A5	23	AXL	0.394204	0.266641
A5	24	AXL	0.541041	0.413093
A5	25	AXL	0.696501	0.568168
A5	26	AXL	0.830296	0.701577
A5	27	AXL	0.933833	0.804729
A5	28	AXL	1.00973	0.880237
A5	29	AXL	1.06053	0.930655
A5	30	AXL	1.09957	0.969314
A5	31	AXL	1.1249	0.99425
A5	32	AXL	1.14926	1.01823
A5	33	AXL	1.16496	1.03354
A5	34	AXL	1.17745	1.04564
A5	35	AXL	1.18739	1.0552
A5	36	AXL	1.187	1.05443
A5	37	AXL	1.19376	1.0608
A5	38	AXL	1.19232	1.05897
A5	39	AXL	1.19177	1.05804
A5	40	AXL	1.19708	1.06297
A5	41	AXL	1.19268	1.05818
A5	42	AXL	1.1957	1.06081
A5	43	AXL	1.19433	1.05906
A5	44	AXL	1.19148	1.05583
A5	45	AXL	1.19308	1.05704
A6	1	AXL	0.14038	0.00957388
A6	2	AXL	0.135198	0.00405422
A6	3	AXL	0.133677	0.00219395
A6	4	AXL	0.133037	0.00121622
A6	5	AXL	0.133695	0.00153513
A6	6	AXL	0.131684	-0.000813751
A6	7	AXL	0.131546	-0.00129027
A6	8	AXL	0.133262	8.72649e-05
A6	9	AXL	0.131959	-0.00155445
A6	10	AXL	0.132862	-0.000990176
A6	11	AXL	0.133434	-0.000756517
A6	12	AXL	0.132727	-0.00180217
A6	13	AXL	0.132566	-0.00230162
A6	14	AXL	0.135024	-0.000181188
A6	15	AXL	0.134668	-0.000876303
A6	16	AXL	0.136423	0.000540329
A6	17	AXL	0.141215	0.00499355
A6	18	AXL	0.149483	0.0129235
A6	19	AXL	0.16428	0.027382
A6	20	AXL	0.193025	0.0557889
A6	21	AXL	0.243669	0.106094
A6	22	AXL	0.329993	0.19208
A6	23	AXL	0.452627	0.314375
A6	24	AXL	0.599426	0.460835
A6	25	AXL	0.746965	0.608036
A6	26	AXL	0.864653	0.725386
A6	27	AXL	0.953489	0.813884
A6	28	AXL	1.01733	0.877384
A6	29	AXL	1.06352	0.923234
A6	30	AXL	1.09966	0.959037
A6	31	AXL	1.125	0.98404
A6	32	AXL	1.14558	1.00428
A6	33	AXL	1.16021	1.01857
A6	34	AXL	1.17149	1.02951
A6	35	AXL	1.18041	1.03809
A6	36	AXL	1.17997	1.03732
A6	37	AXL	1.18593	1.04294
A6	38	AXL	1.18856	1.04523
A6	39	AXL	1.18459	1.04092
A6	40	AXL	1.18707	1.04306
A6	41	AXL	1.18696	1.04261
A6	42	AXL	1.18709	1.04241
A6	43	AXL	1.18613	1.04111
A6	44	AXL	1.18584	1.04048
A6	45	AXL	1.18616	1.04046
A7	1	VEGFA	0.143646	0.00612786
A7	2	VEGFA	0.140955	0.00263531
A7	3	VEGFA	0.140878	0.00175628
A7	4	VEGFA	0.140844	0.000920765
A7	5	VEGFA	0.140421	-0.000303507
A7	6	VEGFA	0.142606	0.00107976
A7	7	VEGFA	0.142788	0.000460624
A7	8	VEGFA	0.142177	-0.000951626
A7	9	VEGFA	0.141954	-0.00197654
A7	10	VEGFA	0.142823	-0.00190895
A7	11	VEGFA	0.14402	-0.00151321
A7	12	VEGFA	0.146096	-0.000238829
A7	13	VEGFA	0.146845	-0.000291035
A7	14	VEGFA	0.146803	-0.00113385
A7	15	VEGFA	0.147818	-0.000920818
A7	16	VEGFA	0.154561	0.00502094
A7	17	VEGFA	0.161998	0.0116561
A7	18	VEGFA	0.177147	0.026004
A7	19	VEGFA	0.205048	0.0531033
A7	20	VEGFA	0.261418	0.108672
A7	21	VEGFA	0.347389	0.193842
A7	22	VEGFA	0.478076	0.323727
A7	23	VEGFA	0.637593	0.482443
A7	24	VEGFA	0.793671	0.63772
A7	25	VEGFA	0.928337	0.771584
A7	26	VEGFA	1.01838	0.86083
A7	27	VEGFA	1.08931	0.930949
A7	28	VEGFA	1.13723	0.978071
A7	29	VEGFA	1.17497	1.01501
A7	30	VEGFA	1.20387	1.04311
A7	31	VEGFA	1.22085	1.05929
A7	32	VEGFA	1.23505	1.07268
A7	33	VEGFA	1.24444	1.08127
A7	34	VEGFA	1.24911	1.08514
A7	35	VEGFA	1.25586	1.0911
A7	36	VEGFA	1.25274	1.08717
A7	37	VEGFA	1.2572	1.09083
A7	38	VEGFA	1.25474	1.08757
A7	39	VEGFA	1.25915	1.09117
A7	40	VEGFA	1.26046	1.09169
A7	41	VEGFA	1.25651	1.08693
A7	42	VEGFA	1.26016	1.08978
A7	43	VEGFA	1.25992	1.08874
A7	44	VEGFA	1.2603	1.08832
A7	45	VEGFA	1.25884	1.08606
A8	1
A8	2
A8	3
A8	4
A8	5
A8	6
A8	7
A8	8
A8	9
A8	10
A8	11
A8	12
A8	13
A8	14
A8	15
A8	16
A8	17
A8	18
A8	19
A8	20
A8	21
A8	22
A8	23
A8	24
A8	25
A8	26
A8	27
A8	28
A8	29
A8	30
A8	31
A8	32
A8	33
A8	34
A8	35
A8	36
A8	37
A8	38
A8	39
A8	40
A8	41
A8	42
A8	43
A8	44
A8	45
A9	1
A9	2
A9	3
A9	4
A9	5
A9	6
A9	7
A9	8
A9	9
A9	10
A9	11
A9	12
A9	13
A9	14
A9	15
A9	16
A9	17
A9	18
A9	19
A9	20
A9	21
A9	22
A9	23
A9	24
A9	25
A9	26
A9	27
A9	28
A9	29
A9	30
A9	31
A9	32
A9	33
A9	34
A9	35
A9	36
A9	37
A9	38
A9	39
A9	40
A9	41
A9	42
A9	43
A9	44
A9	45
A10	1	MAPK3	0.188436	0.00715402
A10	2	MAPK3	0.184971	0.00336213
A10	3	MAPK3	0.184997	0.00306132
A10	4	MAPK3	0.18337	0.00110656
A10	5	MAPK3	0.18109	-0.00150007
A10	6	MAPK3	0.183017	0.000100009
A10	7	MAPK3	0.1817	-0.00154417
A10	8	MAPK3	0.182698	-0.000873001
A10	9	MAPK3	0.183487	-0.000411315
A10	10	MAPK3	0.183592	-0.000633145
A10	11	MAPK3	0.184167	-0.000385157
A10	12	MAPK3	0.185072	0.00019319
A10	13	MAPK3	0.183987	-0.00121921
A10	14	MAPK3	0.184393	-0.00114
A10	15	MAPK3	0.185564	-0.000295901
A10	16	MAPK3	0.187099	0.000911752
A10	17	MAPK3	0.189143	0.00262913
A10	18	MAPK3	0.193683	0.00684217
A10	19	MAPK3	0.204785	0.0176169
A10	20	MAPK3	0.220078	0.0325828
A10	21	MAPK3	0.250222	0.0623995
A10	22	MAPK3	0.305256	0.117107
A10	23	MAPK3	0.390554	0.202078
A10	24	MAPK3	0.511031	0.322228
A10	25	MAPK3	0.651779	0.462648
A10	26	MAPK3	0.789301	0.599844
A10	27	MAPK3	0.902342	0.712558
A10	28	MAPK3	0.989265	0.799154
A10	29	MAPK3	1.05676	0.866322
A10	30	MAPK3	1.10993	0.919163
A10	31	MAPK3	1.14668	0.955588
A10	32	MAPK3	1.17663	0.985209
A10	33	MAPK3	1.19999	1.00825
A10	34	MAPK3	1.21923	1.02716
A10	35	MAPK3	1.23849	1.04609
A10	36	MAPK3	1.24677	1.05404
A10	37	MAPK3	1.2547	1.06165
A10	38	MAPK3	1.26172	1.06834
A10	39	MAPK3	1.27041	1.0767
A10	40	MAPK3	1.27297	1.07893
A10	41	MAPK3	1.27928	1.08492
A10	42	MAPK3	1.28107	1.08638
A10	43	MAPK3	1.28166	1.08664
A10	44	MAPK3	1.28267	1.08733
A10	45	MAPK3	1.28796	1.09229
A11	1
A11	2
A11	3
A11	4
A11	5
A11	6
A11	7
A11	8
A11	9
A11	10
A11	11
A11	12
A11	13
A11	14
A11	15
A11	16
A11	17
A11	18
A11	19
A11	20
A11	21
A11	22
A11	23
A11	24
A11	25
A11	26
A11	27
A11	28
A11	29
A11	30
A11	31
A11	32
A11	33
A11	34
A11	35
A11	36
A11	37
A11	38
A11	39
A11	40
A11	41
A11	42
A11	43
A11	44
A11	45
A12	1
A12	2
A12	3
A12	4
A12	5
A12	6
A12	7
A12	8
A12	9
A12	10
A12	11
A12	12
A12	13
A12	14
A12	15
A12	16
A12	17
A12	18
A12	19
A12	20
A12	21
A12	22
A12	23
A12	24
A12	25
A12	26
A12	27
A12	28
A12	29
A12	30
A12	31
A12	32
A12	33
A12	34
A12	35
A12	36
A12	37
A12	38
A12	39
A12	40
A12	41
A12	42
A12	43
A12	44
A12	45
B1	1	AXL	0.309508	0.016755
B1	2	AXL	0.301076	0.00763336
B1	3	AXL	0.29873	0.00459768
B1	4	AXL	0.296384	0.00156221
B1	5	AXL	0.295544	3.32424e-05
B1	6	AXL	0.295216	-0.000984554
B1	7	AXL	0.295644	-0.00124507
B1	8	AXL	0.294747	-0.00283227
B1	9	AXL	0.294601	-0.0036675
B1	10	AXL	0.298346	-0.000611768
B1	11	AXL	0.298425	-0.00122226
B1	12	AXL	0.299339	-0.000996968
B1	13	AXL	0.300333	-0.000692853
B1	14	AXL	0.302003	0.000288073
B1	15	AXL	0.308176	0.00577204
B1	16	AXL	0.316004	0.0129103
B1	17	AXL	0.331084	0.0273005
B1	18	AXL	0.352478	0.0480051
B1	19	AXL	0.403057	0.0978955
B1	20	AXL	0.485653	0.179801
B1	21	AXL	0.600987	0.294446
B1	22	AXL	0.752035	0.444805
B1	23	AXL	0.90688	0.598961
B1	24	AXL	1.0279	0.71929
B1	25	AXL	1.1208	0.811503
B1	26	AXL	1.18337	0.873384
B1	27	AXL	1.231	0.920326
B1	28	AXL	1.26222	0.950852
B1	29	AXL	1.29139	0.97933
B1	30	AXL	1.31447	1.00172
B1	31	AXL	1.32585	1.01242
B1	32	AXL	1.33951	1.02539
B1	33	AXL	1.34702	1.03221
B1	34	AXL	1.35735	1.04185
B1	35	AXL	1.36295	1.04676
B1	36	AXL	1.35964	1.04276
B1	37	AXL	1.3654	1.04783
B1	38	AXL	1.36297	1.04471
B1	39	AXL	1.36182	1.04287
B1	40	AXL	1.36437	1.04473
B1	41	AXL	1.3593	1.03897
B1	42	AXL	1.36337	1.04235
B1	43	AXL	1.36356	1.04186
B1	44	AXL	1.3626	1.0402
B1	45	AXL	1.36311	1.04002
B2	1	AXL	0.187833	0.00706258
B2	2	AXL	0.183497	0.00183923
B2	3	AXL	0.185379	0.00283432
B2	4	AXL	0.183999	0.000566573
B2	5	AXL	0.184067	-0.000252794
B2	6	AXL	0.18569	0.000483013
B2	7	AXL	0.18678	0.000685745
B2	8	AXL	0.186652	-0.000329707
B2	9	AXL	0.186227	-0.00164259
B2	10	AXL	0.188734	-2.29612e-05
B2	11	AXL	0.187538	-0.00210568
B2	12	AXL	0.188231	-0.00230035
B2	13	AXL	0.190732	-0.000686636
B2	14	AXL	0.188713	-0.00359361
B2	15	AXL	0.193651	0.000457808
B2	16	AXL	0.194794	0.000712709
B2	17	AXL	0.196283	0.00131481
B2	18	AXL	0.199735	0.00387935
B2	19	AXL	0.206907	0.0101635
B2	20	AXL	0.220018	0.0223872
B2	21	AXL	0.248124	0.0496064
B2	22	AXL	0.297967	0.098562
B2	23	AXL	0.380821	0.180529
B2	24	AXL	0.501583	0.300403
B2	25	AXL	0.650073	0.448005
B2	26	AXL	0.797343	0.594388
B2	27	AXL	0.920296	0.716453
B2	28	AXL	1.01347	0.808741
B2	29	AXL	1.07977	0.874149
B2	30	AXL	1.12827	0.921766
B2	31	AXL	1.16204	0.954652
B2	32	AXL	1.19326	0.984986
B2	33	AXL	1.21174	1.00257
B2	34	AXL	1.22504	1.01498
B2	35	AXL	1.23898	1.02804
B2	36	AXL	1.24437	1.03255
B2	37	AXL	1.24787	1.03515
B2	38	AXL	1.24591	1.03231
B2	39	AXL	1.25082	1.03633
B2	40	AXL	1.25256	1.03718
B2	41	AXL	1.24807	1.0318
B2	42	AXL	1.2517	1.03455
B2	43	AXL	1.25031	1.03227
B2	44	AXL	1.24711	1.02818
B2	45	AXL	1.2497	1.02989
B3	1	AXL	0.195938	0.00986425
B3	2	AXL	0.191422	0.00444882
B3	3	AXL	0.190783	0.00291065
B3	4	AXL	0.190563	0.00179118
B3	5	AXL	0.189975	0.000304161
B3	6	AXL	0.190309	-0.000261312
B3	7	AXL	0.191143	-0.000326477
B3	8	AXL	0.192271	-9.77326e-05
B3	9	AXL	0.191347	-0.001921
B3	10	AXL	0.192165	-0.00200232
B3	11	AXL	0.194455	-0.000611593
B3	12	AXL	0.193261	-0.00270487
B3	13	AXL	0.195287	-0.00157782
B3	14	AXL	0.195377	-0.00238687
B3	15	AXL	0.197316	-0.00134765
B3	16	AXL	0.201642	0.00207971
B3	17	AXL	0.206614	0.00615194
B3	18	AXL	0.216441	0.0150803
B3	19	AXL	0.234252	0.0319914
B3	20	AXL	0.268504	0.0653445
B3	21	AXL	0.327564	0.123505
B3	22	AXL	0.424229	0.21927
B3	23	AXL	0.558668	0.35281
B3	24	AXL	0.716642	0.509885
B3	25	AXL	0.859729	0.652073
B3	26	AXL	0.975526	0.766971
B3	27	AXL	1.05833	0.848872
B3	28	AXL	1.11928	0.908922
B3	29	AXL	1.16348	0.952229
B3	30	AXL	1.19535	0.983201
B3	31	AXL	1.21823	1.00518
B3	32	AXL	1.23787	1.02392
B3	33	AXL	1.25184	1.03699
B3	34	AXL	1.25933	1.04358
B3	35	AXL	1.273	1.05636
B3	36	AXL	1.2743	1.05676
B3	37	AXL	1.27801	1.05956
B3	38	AXL	1.27887	1.05952
B3	39	AXL	1.27797	1.05773
B3	40	AXL	1.27811	1.05697
B3	41	AXL	1.27828	1.05624
B3	42	AXL	1.27758	1.05464
B3	43	AXL	1.28025	1.05641
B3	44	AXL	1.27654	1.05179
B3	45	AXL	1.27958	1.05394
B4	1	AXL	0.132808	0.00988989
B4	2	AXL	0.127248	0.00416237
B4	3	AXL	0.126041	0.00278734
B4	4	AXL	0.125153	0.00173104
B4	5	AXL	0.124219	0.000629642
B4	6	AXL	0.123695	-6.32197e-05
B4	7	AXL	0.123112	-0.000814263
B4	8	AXL	0.122332	-0.00176176
B4	9	AXL	0.123401	-0.000860619
B4	10	AXL	0.122489	-0.00194107
B4	11	AXL	0.123488	-0.00111006
B4	12	AXL	0.122989	-0.0017766
B4	13	AXL	0.12339	-0.00154392
B4	14	AXL	0.124411	-0.000690671
B4	15	AXL	0.124072	-0.00119767
B4	16	AXL	0.127708	0.00227073
B4	17	AXL	0.129947	0.0043411
B4	18	AXL	0.135971	0.0101973
B4	19	AXL	0.146691	0.0207494
B4	20	AXL	0.169008	0.0428989
B4	21	AXL	0.210557	0.0842795
B4	22	AXL	0.282955	0.156509
B4	23	AXL	0.393888	0.267275
B4	24	AXL	0.539404	0.412622
B4	25	AXL	0.695152	0.568203
B4	26	AXL	0.833418	0.706301
B4	27	AXL	0.937806	0.810521
B4	28	AXL	1.0106	0.883142
B4	29	AXL	1.0621	0.934482
B4	30	AXL	1.10435	0.976564
B4	31	AXL	1.13308	1.00512
B4	32	AXL	1.15755	1.02943
B4	33	AXL	1.17296	1.04467
B4	34	AXL	1.18496	1.0565
B4	35	AXL	1.19178	1.06315
B4	36	AXL	1.1975	1.0687
B4	37	AXL	1.20176	1.0728
B4	38	AXL	1.20201	1.07288
B4	39	AXL	1.20253	1.07323
B4	40	AXL	1.20407	1.0746
B4	41	AXL	1.20311	1.07347
B4	42	AXL	1.20191	1.07211
B4	43	AXL	1.20149	1.07152
B4	44	AXL	1.20146	1.07132
B4	45	AXL	1.20121	1.0709
B5	1	AXL	0.131154	0.00450449
B5	2	AXL	0.128477	0.00127487
B5	3	AXL	0.129541	0.00178672
B5	4	AXL	0.129104	0.000796441
B5	5	AXL	0.128752	-0.000108362
B5	6	AXL	0.128061	-0.00135178
B5	7	AXL	0.129285	-0.000680009
B5	8	AXL	0.13095	0.000431881
B5	9	AXL	0.131064	-7.00708e-06
B5	10	AXL	0.130798	-0.000825622
B5	11	AXL	0.131185	-0.000990642
B5	12	AXL	0.13227	-0.000458824
B5	13	AXL	0.133702	0.000420162
B5	14	AXL	0.133091	-0.000742908
B5	15	AXL	0.133596	-0.000791058
B5	16	AXL	0.134858	-8.11266e-05
B5	17	AXL	0.138094	0.00260214
B5	18	AXL	0.147237	0.0111926
B5	19	AXL	0.160542	0.0239443
B5	20	AXL	0.18227	0.04512
B5	21	AXL	0.223582	0.0858794
B5	22	AXL	0.299694	0.161439
B5	23	AXL	0.413009	0.274201
B5	24	AXL	0.562322	0.422961
B5	25	AXL	0.722191	0.582278
B5	26	AXL	0.858122	0.717656
B5	27	AXL	0.963208	0.82219
B5	28	AXL	1.03611	0.894536
B5	29	AXL	1.08987	0.947744
B5	30	AXL	1.12869	0.986013
B5	31	AXL	1.1537	1.01048
B5	32	AXL	1.17852	1.03474
B5	33	AXL	1.1948	1.05047
B5	34	AXL	1.20559	1.06071
B5	35	AXL	1.21271	1.06727
B5	36	AXL	1.21358	1.06758
B5	37	AXL	1.22104	1.0745
B5	38	AXL	1.21727	1.07018
B5	39	AXL	1.22075	1.07309
B5	40	AXL	1.22401	1.0758
B5	41	AXL	1.2208	1.07205
B5	42	AXL	1.2238	1.07449
B5	43	AXL	1.22256	1.0727
B5	44	AXL	1.21884	1.06843
B5	45	AXL	1.22151	1.07054
B6	1	AXL	0.108695	0.00484563
B6	2	AXL	0.108114	0.00340342
B6	3	AXL	0.107122	0.00155092
B6	4	AXL	0.10783	0.00139728
B6	5	AXL	0.107334	4.0801e-05
B6	6	AXL	0.107897	-0.000257514
B6	7	AXL	0.108861	-0.000154944
B6	8	AXL	0.10976	-0.00011688
B6	9	AXL	0.110123	-0.000615072
B6	10	AXL	0.110401	-0.00119778
B6	11	AXL	0.112089	-0.000371187
B6	12	AXL	0.112453	-0.000867949
B6	13	AXL	0.113291	-0.000891516
B6	14	AXL	0.111895	-0.00314883
B6	15	AXL	0.114659	-0.00124541
B6	16	AXL	0.117208	0.000442036
B6	17	AXL	0.123063	0.00543603
B6	18	AXL	0.130973	0.0124856
B6	19	AXL	0.146544	0.0271954
B6	20	AXL	0.175457	0.0552472
B6	21	AXL	0.228631	0.107561
B6	22	AXL	0.317919	0.195987
B6	23	AXL	0.445337	0.322544
B6	24	AXL	0.599105	0.475451
B6	25	AXL	0.747654	0.623139
B6	26	AXL	0.868465	0.743089
B6	27	AXL	0.960839	0.834601
B6	28	AXL	1.02353	0.896434
B6	29	AXL	1.07047	0.942507
B6	30	AXL	1.1065	0.977675
B6	31	AXL	1.13407	1.00439
B6	32	AXL	1.15379	1.02325
B6	33	AXL	1.16751	1.03611
B6	34	AXL	1.17459	1.04233
B6	35	AXL	1.18627	1.05314
B6	36	AXL	1.19091	1.05692
B6	37	AXL	1.19044	1.05559
B6	38	AXL	1.19312	1.05741
B6	39	AXL	1.19388	1.05731
B6	40	AXL	1.19418	1.05675
B6	41	AXL	1.19075	1.05245
B6	42	AXL	1.19363	1.05447
B6	43	AXL	1.19227	1.05225
B6	44	AXL	1.19407	1.05319
B6	45	AXL	1.19291	1.05118
B7	1	VEGFA	0.137733	0.00469124
B7	2	VEGFA	0.135747	0.00165973
B7	3	VEGFA	0.13516	2.6969e-05
B7	4	VEGFA	0.137754	0.00157592
B7	5	VEGFA	0.138448	0.00122404
B7	6	VEGFA	0.138441	0.000171337
B7	7	VEGFA	0.139451	0.000135784
B7	8	VEGFA	0.138683	-0.00167731
B7	9	VEGFA	0.140469	-0.000936961
B7	10	VEGFA	0.142379	-7.23794e-05
B7	11	VEGFA	0.142751	-0.000745359
B7	12	VEGFA	0.143153	-0.00138894
B7	13	VEGFA	0.144066	-0.00152181
B7	14	VEGFA	0.145859	-0.000773755
B7	15	VEGFA	0.147824	0.0001455
B7	16	VEGFA	0.152561	0.00383697
B7	17	VEGFA	0.161065	0.011295
B7	18	VEGFA	0.177051	0.0262356
B7	19	VEGFA	0.205641	0.0537808
B7	20	VEGFA	0.258699	0.105793
B7	21	VEGFA	0.351886	0.197935
B7	22	VEGFA	0.481707	0.32671
B7	23	VEGFA	0.641955	0.485912
B7	24	VEGFA	0.805704	0.648616
B7	25	VEGFA	0.934589	0.776456
B7	26	VEGFA	1.02813	0.868953
B7	27	VEGFA	1.09735	0.937121
B7	28	VEGFA	1.14478	0.983507
B7	29	VEGFA	1.18479	1.02248
B7	30	VEGFA	1.21097	1.04761
B7	31	VEGFA	1.23275	1.06834
B7	32	VEGFA	1.24243	1.07698
B7	33	VEGFA	1.25122	1.08472
B7	34	VEGFA	1.25536	1.08782
B7	35	VEGFA	1.26066	1.09207
B7	36	VEGFA	1.26207	1.09244
B7	37	VEGFA	1.26343	1.09275
B7	38	VEGFA	1.26264	1.09092
B7	39	VEGFA	1.26732	1.09455
B7	40	VEGFA	1.2657	1.09188
B7	41	VEGFA	1.2643	1.08944
B7	42	VEGFA	1.26554	1.08964
B7	43	VEGFA	1.26284	1.08589
B7	44	VEGFA	1.26516	1.08716
B7	45	VEGFA	1.26425	1.08521
B8	1	JUN	0.133713	0.00148113
B8	2	JUN	0.134087	0.000759045
B8	3	JUN	0.13472	0.000295743
B8	4	JUN	0.136502	0.000982201
B8	5	JUN	0.136968	0.00035156
B8	6	JUN	0.138677	0.000964406
B8	7	JUN	0.140552	0.0017434
B8	8	JUN	0.139872	-3.30663e-05
B8	9	JUN	0.140648	-0.000353197
B8	10	JUN	0.140791	-0.00130691
B8	11	JUN	0.141935	-0.00125888
B8	12	JUN	0.141682	-0.0026079
B8	13	JUN	0.143419	-0.00196722
B8	14	JUN	0.144	-0.00248234
B8	15	JUN	0.146586	-0.000992765
B8	16	JUN	0.14967	0.000995563
B8	17	JUN	0.15544	0.00566941
B8	18	JUN	0.164292	0.0134249
B8	19	JUN	0.181826	0.0298627
B8	20	JUN	0.214348	0.0612881
B8	21	JUN	0.274326	0.12017
B8	22	JUN	0.366022	0.21077
B8	23	JUN	0.497765	0.341416
B8	24	JUN	0.647998	0.490554
B8	25	JUN	0.793386	0.634845
B8	26	JUN	0.91164	0.752003
B8	27	JUN	1.00278	0.842044
B8	28	JUN	1.07134	0.909511
B8	29	JUN	1.12297	0.960044
B8	30	JUN	1.16276	0.998735
B8	31	JUN	1.19145	1.02634
B8	32	JUN	1.21578	1.04957
B8	33	JUN	1.23568	1.06837
B8	34	JUN	1.2502	1.08179
B8	35	JUN	1.26462	1.09511
B8	36	JUN	1.27343	1.10283
B8	37	JUN	1.28193	1.11023
B8	38	JUN	1.2893	1.1165
B8	39	JUN	1.29518	1.12129
B8	40	JUN	1.30095	1.12597
B8	41	JUN	1.30523	1.12915
B8	42	JUN	1.30762	1.13045
B8	43	JUN	1.3115	1.13322
B8	44	JUN	1.30821	1.12884
B8	45	JUN	1.30672	1.12626
B9	1
B9	2
B9	3
B9	4
B9	5
B9	6
B9	7
B9	8
B9	9
B9	10
B9	11
B9	12
B9	13
B9	14
B9	15
B9	16
B9	17
B9	18
B9	19
B9	20
B9	21
B9	22
B9	23
B9	24
B9	25
B9	26
B9	27
B9	28
B9	29
B9	30
B9	31
B9	32
B9	33
B9	34
B9	35
B9	36
B9	37
B9	38
B9	39
B9	40
B9	41
B9	42
B9	43
B9	44
B9	45
B10	1	MAPK3	0.127759	0.00515478
B10	2	MAPK3	0.127216	0.00380962
B10	3	MAPK3	0.125107	0.000897404
B10	4	MAPK3	0.126251	0.00123819
B10	5	MAPK3	0.126236	0.00042041
B10	6	MAPK3	0.128209	0.00159119
B10	7	MAPK3	0.127621	0.000200222
B10	8	MAPK3	0.128103	-0.000120202
B10	9	MAPK3	0.127269	-0.0017568
B10	10	MAPK3	0.129613	-0.000216322
B10	11	MAPK3	0.130251	-0.000380686
B10	12	MAPK3	0.129374	-0.00206015
B10	13	MAPK3	0.129356	-0.00288102
B10	14	MAPK3	0.132155	-0.0008854
B10	15	MAPK3	0.132008	-0.00183464
B10	16	MAPK3	0.133774	-0.000871699
B10	17	MAPK3	0.136854	0.00140578
B10	18	MAPK3	0.141505	0.00525373
B10	19	MAPK3	0.150135	0.0130814
B10	20	MAPK3	0.168618	0.0307613
B10	21	MAPK3	0.200205	0.0615452
B10	22	MAPK3	0.257421	0.117959
B10	23	MAPK3	0.348936	0.208671
B10	24	MAPK3	0.473828	0.33276
B10	25	MAPK3	0.622275	0.480404
B10	26	MAPK3	0.763972	0.621299
B10	27	MAPK3	0.884113	0.740637
B10	28	MAPK3	0.974782	0.830503
B10	29	MAPK3	1.04348	0.898399
B10	30	MAPK3	1.09846	0.952577
B10	31	MAPK3	1.14151	0.994819
B10	32	MAPK3	1.17359	1.0261
B10	33	MAPK3	1.19592	1.04763
B10	34	MAPK3	1.21771	1.06862
B10	35	MAPK3	1.22933	1.07943
B10	36	MAPK3	1.2432	1.0925
B10	37	MAPK3	1.25527	1.10376
B10	38	MAPK3	1.25883	1.10653
B10	39	MAPK3	1.26797	1.11486
B10	40	MAPK3	1.2732	1.11929
B10	41	MAPK3	1.27362	1.11891
B10	42	MAPK3	1.2781	1.12259
B10	43	MAPK3	1.28036	1.12404
B10	44	MAPK3	1.28046	1.12334
B10	45	MAPK3	1.28201	1.12409
B11	1
B11	2
B11	3
B11	4
B11	5
B11	6
B11	7
B11	8
B11	9
B11	10
B11	11
B11	12
B11	13
B11	14
B11	15
B11	16
B11	17
B11	18
B11	19
B11	20
B11	21
B11	22
B11	23
B11	24
B11	25
B11	26
B11	27
B11	28
B11	29
B11	30
B11	31
B11	32
B11	33
B11	34
B11	35
B11	36
B11	37
B11	38
B11	39
B11	40
B11	41
B11	42
B11	43
B11	44
B11	45
B12	1
B12	2
B12	3
B12	4
B12	5
B12	6
B12	7
B12	8
B12	9
B12	10
B12	11
B12	12
B12	13
B12	14
B12	15
B12	16
B12	17
B12	18
B12	19
B12	20
B12	21
B12	22
B12	23
B12	24
B12	25
B12	26
B12	27
B12	28
B12	29
B12	30
B12	31
B12	32
B12	33
B12	34
B12	35
B12	36
B12	37
B12	38
B12	39
B12	40
B12	41
B12	42
B12	43
B12	44
B12	45
C1	1	AXL	0.58683	0.0610959
C1	2	AXL	0.547908	0.0266517
C1	3	AXL	0.532024	0.0152461
C1	4	AXL	0.516909	0.00461025
C1	5	AXL	0.506817	-0.00100347
C1	6	AXL	0.498554	-0.00478764
C1	7	AXL	0.493097	-0.00576629
C1	8	AXL	0.488584	-0.00580122
C1	9	AXL	0.482298	-0.00760825
C1	10	AXL	0.481093	-0.00433491
C1	11	AXL	0.473843	-0.0071064
C1	12	AXL	0.474695	-0.00177575
C1	13	AXL	0.473301	0.00130936
C1	14	AXL	0.472168	0.00465429
C1	15	AXL	0.475399	0.0123639
C1	16	AXL	0.479552	0.0209955
C1	17	AXL	0.4905	0.0364219
C1	18	AXL	0.514705	0.0651053
C1	19	AXL	0.560405	0.115284
C1	20	AXL	0.639452	0.19881
C1	21	AXL	0.757784	0.32162
C1	22	AXL	0.904894	0.473209
C1	23	AXL	1.05281	0.625604
C1	24	AXL	1.17854	0.755814
C1	25	AXL	1.26901	0.850761
C1	26	AXL	1.32821	0.914436
C1	27	AXL	1.3781	0.968812
C1	28	AXL	1.40951	1.0047
C1	29	AXL	1.42624	1.0259
C1	30	AXL	1.45084	1.05498
C1	31	AXL	1.46427	1.0729
C1	32	AXL	1.47998	1.09308
C1	33	AXL	1.485	1.10258
C1	34	AXL	1.48991	1.11197
C1	35	AXL	1.49794	1.12448
C1	36	AXL	1.49235	1.12337
C1	37	AXL	1.49752	1.13302
C1	38	AXL	1.49566	1.13563
C1	39	AXL	1.49424	1.13869
C1	40	AXL	1.49218	1.14111
C1	41	AXL	1.49465	1.14806
C1	42	AXL	1.49364	1.15152
C1	43	AXL	1.49121	1.15358
C1	44	AXL	1.48829	1.15513
C1	45	AXL	1.48982	1.16115
C2	1	AXL	0.177371	0.00407617
C2	2	AXL	0.176278	0.00206674
C2	3	AXL	0.176829	0.00170181
C2	4	AXL	0.176858	0.000814323
C2	5	AXL	0.177604	0.000644449
C2	6	AXL	0.177762	-0.000114587
C2	7	AXL	0.178576	-0.000216422
C2	8	AXL	0.180308	0.000598879
C2	9	AXL	0.17996	-0.000664919
C2	10	AXL	0.180166	-0.0013752
C2	11	AXL	0.18137	-0.00108814
C2	12	AXL	0.182461	-0.000913263
C2	13	AXL	0.183242	-0.00104855
C2	14	AXL	0.182665	-0.00254143
C2	15	AXL	0.185659	-0.000463742
C2	16	AXL	0.186151	-0.000888619
C2	17	AXL	0.189076	0.00112079
C2	18	AXL	0.193307	0.00443463
C2	19	AXL	0.202531	0.0127425
C2	20	AXL	0.215565	0.0248602
C2	21	AXL	0.242643	0.0510218
C2	22	AXL	0.291494	0.0989567
C2	23	AXL	0.372884	0.179431
C2	24	AXL	0.493545	0.299175
C2	25	AXL	0.642306	0.44702
C2	26	AXL	0.790059	0.593857
C2	27	AXL	0.910493	0.713374
C2	28	AXL	1.00236	0.804329
C2	29	AXL	1.0709	0.871944
C2	30	AXL	1.11923	0.91936
C2	31	AXL	1.15107	0.95029
C2	32	AXL	1.18154	0.979837
C2	33	AXL	1.20332	1.0007
C2	34	AXL	1.21654	1.01301
C2	35	AXL	1.23082	1.02637
C2	36	AXL	1.2346	1.02924
C2	37	AXL	1.23924	1.03296
C2	38	AXL	1.23982	1.03262
C2	39	AXL	1.24036	1.03225
C2	40	AXL	1.23741	1.02837
C2	41	AXL	1.24003	1.03009
C2	42	AXL	1.24179	1.03093
C2	43	AXL	1.24229	1.03051
C2	44	AXL	1.23876	1.02606
C2	45	AXL	1.24286	1.02924
C3	1	AXL	0.125433	0.00489286
C3	2	AXL	0.125116	0.00336462
C3	3	AXL	0.124503	0.00154153
C3	4	AXL	0.124139	-3.32857e-05
C3	5	AXL	0.126395	0.00101232
C3	6	AXL	0.126713	0.000118843
C3	7	AXL	0.12763	-0.000174443
C3	8	AXL	0.129149	0.000133606
C3	9	AXL	0.130489	0.000263527
C3	10	AXL	0.129885	-0.00155109
C3	11	AXL	0.131805	-0.000842501
C3	12	AXL	0.132731	-0.00112734
C3	13	AXL	0.132823	-0.00224594
C3	14	AXL	0.134283	-0.0019962
C3	15	AXL	0.137139	-0.000350801
C3	16	AXL	0.139754	0.00105326
C3	17	AXL	0.14411	0.00419852
C3	18	AXL	0.153307	0.0121855
C3	19	AXL	0.170701	0.0283682
C3	20	AXL	0.205601	0.0620577
C3	21	AXL	0.264249	0.119495
C3	22	AXL	0.362987	0.217022
C3	23	AXL	0.498771	0.351595
C3	24	AXL	0.654352	0.505966
C3	25	AXL	0.802452	0.652855
C3	26	AXL	0.917838	0.76703
C3	27	AXL	1.00099	0.848974
C3	28	AXL	1.0587	0.905473
C3	29	AXL	1.10651	0.952067
C3	30	AXL	1.13951	0.983862
C3	31	AXL	1.16428	1.00742
C3	32	AXL	1.18257	1.0245
C3	33	AXL	1.1958	1.03652
C3	34	AXL	1.20941	1.04892
C3	35	AXL	1.21426	1.05255
C3	36	AXL	1.21479	1.05188
C3	37	AXL	1.22085	1.05673
C3	38	AXL	1.22568	1.06034
C3	39	AXL	1.22418	1.05763
C3	40	AXL	1.22564	1.05789
C3	41	AXL	1.22306	1.05409
C3	42	AXL	1.22876	1.05858
C3	43	AXL	1.223	1.05161
C3	44	AXL	1.22222	1.04962
C3	45	AXL	1.22187	1.04806
C4	1	AXL	0.268279	0.0165439
C4	2	AXL	0.257612	0.00624305
C4	3	AXL	0.255432	0.00442914
C4	4	AXL	0.252182	0.00154479
C4	5	AXL	0.249975	-0.000297252
C4	6	AXL	0.250008	0.000101811
C4	7	AXL	0.247755	-0.00178556
C4	8	AXL	0.247825	-0.00135038
C4	9	AXL	0.246864	-0.00194565
C4	10	AXL	0.247845	-0.000598549
C4	11	AXL	0.246406	-0.00167227
C4	12	AXL	0.245862	-0.00185036
C4	13	AXL	0.244876	-0.0024711
C4	14	AXL	0.245805	-0.00117641
C4	15	AXL	0.246939	0.000323674
C4	16	AXL	0.248422	0.00217269
C4	17	AXL	0.25046	0.00457543
C4	18	AXL	0.256141	0.0106224
C4	19	AXL	0.266229	0.0210758
C4	20	AXL	0.290295	0.0455078
C4	21	AXL	0.331291	0.0868699
C4	22	AXL	0.401338	0.157282
C4	23	AXL	0.511146	0.267455
C4	24	AXL	0.654814	0.41149
C4	25	AXL	0.813779	0.57082
C4	26	AXL	0.94704	0.704447
C4	27	AXL	1.04962	0.807397
C4	28	AXL	1.12388	0.882014
C4	29	AXL	1.17763	0.93613
C4	30	AXL	1.21781	0.97668
C4	31	AXL	1.24502	1.00425
C4	32	AXL	1.26696	1.02656
C4	33	AXL	1.2859	1.04587
C4	34	AXL	1.29356	1.05389
C4	35	AXL	1.30302	1.06372
C4	36	AXL	1.30441	1.06548
C4	37	AXL	1.30766	1.06909
C4	38	AXL	1.30978	1.07158
C4	39	AXL	1.3072	1.06936
C4	40	AXL	1.31043	1.07296
C4	41	AXL	1.30925	1.07214
C4	42	AXL	1.31287	1.07613
C4	43	AXL	1.30896	1.07258
C4	44	AXL	1.30935	1.07333
C4	45	AXL	1.30638	1.07073
C5	1	AXL	0.0965016	0.00449966
C5	2	AXL	0.0940324	0.00123097
C5	3	AXL	0.0945867	0.000985713
C5	4	AXL	0.0953319	0.000931372
C5	5	AXL	0.0963071	0.00110698
C5	6	AXL	0.0948484	-0.00115125
C5	7	AXL	0.0968899	9.06484e-05
C5	8	AXL	0.0975998	1.05028e-06
C5	9	AXL	0.0988791	0.000480773
C5	10	AXL	0.0981408	-0.00105704
C5	11	AXL	0.0981941	-0.00180327
C5	12	AXL	0.099615	-0.00118196
C5	13	AXL	0.100858	-0.000738146
C5	14	AXL	0.101237	-0.00115882
C5	15	AXL	0.102187	-0.00100904
C5	16	AXL	0.105281	0.00128589
C5	17	AXL	0.108012	0.0032171
C5	18	AXL	0.11453	0.00893563
C5	19	AXL	0.125839	0.0194451
C5	20	AXL	0.148913	0.0417195
C5	21	AXL	0.190397	0.0824039
C5	22	AXL	0.265476	0.156683
C5	23	AXL	0.377777	0.268185
C5	24	AXL	0.526368	0.415976
C5	25	AXL	0.682265	0.571074
C5	26	AXL	0.818609	0.706618
C5	27	AXL	0.921348	0.808558
C5	28	AXL	0.994122	0.880532
C5	29	AXL	1.04862	0.93423
C5	30	AXL	1.08495	0.969762
C5	31	AXL	1.11695	1.00096
C5	32	AXL	1.13778	1.02099
C5	33	AXL	1.15438	1.0368
C5	34	AXL	1.16392	1.04553
C5	35	AXL	1.17221	1.05302
C5	36	AXL	1.17782	1.05783
C5	37	AXL	1.18199	1.0612
C5	38	AXL	1.18088	1.05929
C5	39	AXL	1.18382	1.06143
C5	40	AXL	1.18666	1.06347
C5	41	AXL	1.1843	1.06032
C5	42	AXL	1.18183	1.05704
C5	43	AXL	1.1832	1.05762
C5	44	AXL	1.18501	1.05862
C5	45	AXL	1.18046	1.05328
C6	1	AXL	0.103631	0.0053291
C6	2	AXL	0.100725	0.00165974
C6	3	AXL	0.100853	0.00102405
C6	4	AXL	0.100439	-0.000153402
C6	5	AXL	0.101374	1.86292e-05
C6	6	AXL	0.102137	1.82908e-05
C6	7	AXL	0.102798	-8.48432e-05
C6	8	AXL	0.103768	0.000121825
C6	9	AXL	0.104363	-4.59574e-05
C6	10	AXL	0.104808	-0.000364577
C6	11	AXL	0.105429	-0.000507035
C6	12	AXL	0.105773	-0.000926469
C6	13	AXL	0.106584	-0.000879176
C6	14	AXL	0.107782	-0.000443581
C6	15	AXL	0.109194	0.000204177
C6	16	AXL	0.111771	0.00201806
C6	17	AXL	0.114842	0.00432604
C6	18	AXL	0.125113	0.0138333
C6	19	AXL	0.140385	0.028342
C6	20	AXL	0.169999	0.0571922
C6	21	AXL	0.225898	0.112328
C6	22	AXL	0.315374	0.201041
C6	23	AXL	0.446956	0.33186
C6	24	AXL	0.599759	0.483899
C6	25	AXL	0.75113	0.634506
C6	26	AXL	0.873474	0.756088
C6	27	AXL	0.961078	0.842928
C6	28	AXL	1.02459	0.905672
C6	29	AXL	1.07236	0.952685
C6	30	AXL	1.10637	0.985927
C6	31	AXL	1.13388	1.01267
C6	32	AXL	1.15354	1.03157
C6	33	AXL	1.16852	1.04578
C6	34	AXL	1.17904	1.05555
C6	35	AXL	1.18552	1.06127
C6	36	AXL	1.18948	1.06446
C6	37	AXL	1.19167	1.06589
C6	38	AXL	1.19312	1.06658
C6	39	AXL	1.19336	1.06605
C6	40	AXL	1.1944	1.06632
C6	41	AXL	1.19411	1.06527
C6	42	AXL	1.19345	1.06385
C6	43	AXL	1.19423	1.06386
C6	44	AXL	1.19405	1.06293
C6	45	AXL	1.191	1.05911
C7	1	VEGFA	0.393817	0.0178654
C7	2	VEGFA	0.385414	0.0095962
C7	3	VEGFA	0.379268	0.00358534
C7	4	VEGFA	0.378624	0.00307563
C7	5	VEGFA	0.374419	-0.000995523
C7	6	VEGFA	0.373431	-0.00184922
C7	7	VEGFA	0.372613	-0.00253223
C7	8	VEGFA	0.374284	-0.000726838
C7	9	VEGFA	0.373136	-0.00174099
C7	10	VEGFA	0.373064	-0.00167885
C7	11	VEGFA	0.374525	-8.28823e-05
C7	12	VEGFA	0.373635	-0.000839299
C7	13	VEGFA	0.373788	-0.000551324
C7	14	VEGFA	0.374918	0.000712708
C7	15	VEGFA	0.374862	0.000790905
C7	16	VEGFA	0.376769	0.00283257
C7	17	VEGFA	0.385132	0.0113301
C7	18	VEGFA	0.397052	0.0233846
C7	19	VEGFA	0.424931	0.0513977
C7	20	VEGFA	0.476344	0.102945
C7	21	VEGFA	0.566246	0.192981
C7	22	VEGFA	0.699396	0.326266
C7	23	VEGFA	0.858003	0.485007
C7	24	VEGFA	1.01579	0.642931
C7	25	VEGFA	1.14546	0.772733
C7	26	VEGFA	1.23813	0.865541
C7	27	VEGFA	1.30462	0.932164
C7	28	VEGFA	1.35379	0.981467
C7	29	VEGFA	1.38791	1.01572
C7	30	VEGFA	1.414	1.04194
C7	31	VEGFA	1.43723	1.06531
C7	32	VEGFA	1.44773	1.07595
C7	33	VEGFA	1.45461	1.08296
C7	34	VEGFA	1.46093	1.08941
C7	35	VEGFA	1.46354	1.09216
C7	36	VEGFA	1.46633	1.09508
C7	37	VEGFA	1.46658	1.09546
C7	38	VEGFA	1.46847	1.09749
C7	39	VEGFA	1.46946	1.09861
C7	40	VEGFA	1.46752	1.09681
C7	41	VEGFA	1.46885	1.09828
C7	42	VEGFA	1.46951	1.09907
C7	43	VEGFA	1.46537	1.09506
C7	44	VEGFA	1.47032	1.10014
C7	45	VEGFA	1.4643	1.09426
C8	1	JUN	0.176833	0.00328468
C8	2	JUN	0.176512	0.00211432
C8	3	JUN	0.177864	0.00261531
C8	4	JUN	0.177064	0.000965113
C8	5	JUN	0.17728	0.00033138
C8	6	JUN	0.178311	0.000512308
C8	7	JUN	0.177929	-0.000720065
C8	8	JUN	0.178845	-0.000653906
C8	9	JUN	0.178873	-0.00147654
C8	10	JUN	0.180398	-0.000800969
C8	11	JUN	0.180705	-0.00134421
C8	12	JUN	0.181011	-0.00188855
C8	13	JUN	0.182739	-0.0010101
C8	14	JUN	0.183306	-0.00129346
C8	15	JUN	0.183859	-0.00159099
C8	16	JUN	0.186643	0.000342862
C8	17	JUN	0.193162	0.00601181
C8	18	JUN	0.20311	0.0151093
C8	19	JUN	0.221418	0.0325681
C8	20	JUN	0.256868	0.0671672
C8	21	JUN	0.318327	0.127777
C8	22	JUN	0.415314	0.223914
C8	23	JUN	0.551485	0.359234
C8	24	JUN	0.703948	0.510848
C8	25	JUN	0.849687	0.655736
C8	26	JUN	0.970373	0.775572
C8	27	JUN	1.05772	0.862068
C8	28	JUN	1.12765	0.93115
C8	29	JUN	1.17775	0.980395
C8	30	JUN	1.21472	1.01652
C8	31	JUN	1.24273	1.04368
C8	32	JUN	1.26729	1.06739
C8	33	JUN	1.28408	1.08333
C8	34	JUN	1.29906	1.09745
C8	35	JUN	1.31458	1.11213
C8	36	JUN	1.3233	1.12
C8	37	JUN	1.33056	1.12641
C8	38	JUN	1.34239	1.13738
C8	39	JUN	1.34485	1.139
C8	40	JUN	1.35104	1.14434
C8	41	JUN	1.35283	1.14528
C8	42	JUN	1.35887	1.15047
C8	43	JUN	1.3564	1.14714
C8	44	JUN	1.36015	1.15004
C8	45	JUN	1.35659	1.14564
C9	1
C9	2
C9	3
C9	4
C9	5
C9	6
C9	7
C9	8
C9	9
C9	10
C9	11
C9	12
C9	13
C9	14
C9	15
C9	16
C9	17
C9	18
C9	19
C9	20
C9	21
C9	22
C9	23
C9	24
C9	25
C9	26
C9	27
C9	28
C9	29
C9	30
C9	31
C9	32
C9	33
C9	34
C9	35
C9	36
C9	37
C9	38
C9	39
C9	40
C9	41
C9	42
C9	43
C9	44
C9	45
C10	1	MAPK3	0.125362	0.00307762
C10	2	MAPK3	0.125043	0.00184135
C10	3	MAPK3	0.125362	0.00124351
C10	4	MAPK3	0.125358	0.000321832
C10	5	MAPK3	0.127283	0.00132936
C10	6	MAPK3	0.127675	0.000803378
C10	7	MAPK3	0.127377	-0.000411603
C10	8	MAPK3	0.12888	0.000174087
C10	9	MAPK3	0.128998	-0.000625986
C10	10	MAPK3	0.130252	-0.000289696
C10	11	MAPK3	0.131181	-0.000277835
C10	12	MAPK3	0.130258	-0.00211862
C10	13	MAPK3	0.130255	-0.00303845
C10	14	MAPK3	0.13302	-0.00119114
C10	15	MAPK3	0.133481	-0.00164804
C10	16	MAPK3	0.13584	-0.000206384
C10	17	MAPK3	0.137592	0.000627933
C10	18	MAPK3	0.143189	0.00530766
C10	19	MAPK3	0.151659	0.0128603
C10	20	MAPK3	0.170611	0.0308948
C10	21	MAPK3	0.202374	0.0617401
C10	22	MAPK3	0.257364	0.115813
C10	23	MAPK3	0.349626	0.207158
C10	24	MAPK3	0.476582	0.333196
C10	25	MAPK3	0.622695	0.478392
C10	26	MAPK3	0.765207	0.619986
C10	27	MAPK3	0.882653	0.736514
C10	28	MAPK3	0.977829	0.830773
C10	29	MAPK3	1.04403	0.896057
C10	30	MAPK3	1.09757	0.948678
C10	31	MAPK3	1.1384	0.988587
C10	32	MAPK3	1.16775	1.01703
C10	33	MAPK3	1.19421	1.04257
C10	34	MAPK3	1.21099	1.05843
C10	35	MAPK3	1.22693	1.07345
C10	36	MAPK3	1.23906	1.08467
C10	37	MAPK3	1.24945	1.09414
C10	38	MAPK3	1.25468	1.09845
C10	39	MAPK3	1.25934	1.10219
C10	40	MAPK3	1.26582	1.10775
C10	41	MAPK3	1.27016	1.11117
C10	42	MAPK3	1.27065	1.11075
C10	43	MAPK3	1.27236	1.11155
C10	44	MAPK3	1.2768	1.11507
C10	45	MAPK3	1.27498	1.11233
C11	1
C11	2
C11	3
C11	4
C11	5
C11	6
C11	7
C11	8
C11	9
C11	10
C11	11
C11	12
C11	13
C11	14
C11	15
C11	16
C11	17
C11	18
C11	19
C11	20
C11	21
C11	22
C11	23
C11	24
C11	25
C11	26
C11	27
C11	28
C11	29
C11	30
C11	31
C11	32
C11	33
C11	34
C11	35
C11	36
C11	37
C11	38
C11	39
C11	40
C11	41
C11	42
C11	43
C11	44
C11	45
C12	1
C12	2
C12	3
C12	4
C12	5
C12	6
C12	7
C12	8
C12	9
C12	10
C12	11
C12	12
C12	13
C12	14
C12	15
C12	16
C12	17
C12	18
C12	19
C12	20
C12	21
C12	22
C12	23
C12	24
C12	25
C12	26
C12	27
C12	28
C12	29
C12	30
C12	31
C12	32
C12	33
C12	34
C12	35
C12	36
C12	37
C12	38
C12	39
C12	40
C12	41
C12	42
C12	43
C12	44
C12	45
D1	1	GAPDH-H	0.146577	0.00668557
D1	2	GAPDH-H	0.145067	0.00333131
D1	3	GAPDH-H	0.145938	0.00235821
D1	4	GAPDH-H	0.147188	0.00176305
D1	5	GAPDH-H	0.147472	0.000202796
D1	6	GAPDH-H	0.146919	-0.0021948
D1	7	GAPDH-H	0.150557	-0.000401167
D1	8	GAPDH-H	0.151863	-0.000939212
D1	9	GAPDH-H	0.151638	-0.00300865
D1	10	GAPDH-H	0.156145	-0.000345836
D1	11	GAPDH-H	0.155937	-0.00239857
D1	12	GAPDH-H	0.159444	-0.000735982
D1	13	GAPDH-H	0.167725	0.00570016
D1	14	GAPDH-H	0.175903	0.0120341
D1	15	GAPDH-H	0.188774	0.0230608
D1	16	GAPDH-H	0.211682	0.0441239
D1	17	GAPDH-H	0.252353	0.0829508
D1	18	GAPDH-H	0.310914	0.139668
D1	19	GAPDH-H	0.393485	0.220394
D1	20	GAPDH-H	0.497998	0.323062
D1	21	GAPDH-H	0.615012	0.438233
D1	22	GAPDH-H	0.730713	0.552089
D1	23	GAPDH-H	0.831194	0.650726
D1	24	GAPDH-H	0.913147	0.730834
D1	25	GAPDH-H	0.980911	0.796754
D1	26	GAPDH-H	1.03093	0.844931
D1	27	GAPDH-H	1.07925	0.8914
D1	28	GAPDH-H	1.10879	0.919103
D1	29	GAPDH-H	1.1339	0.942362
D1	30	GAPDH-H	1.15387	0.960494
D1	31	GAPDH-H	1.17274	0.977511
D1	32	GAPDH-H	1.19254	0.995472
D1	33	GAPDH-H	1.20627	1.00736
D1	34	GAPDH-H	1.21614	1.01538
D1	35	GAPDH-H	1.22968	1.02708
D1	36	GAPDH-H	1.23034	1.02589
D1	37	GAPDH-H	1.24363	1.03734
D1	38	GAPDH-H	1.24432	1.03618
D1	39	GAPDH-H	1.25265	1.04267
D1	40	GAPDH-H	1.25828	1.04646
D1	41	GAPDH-H	1.2568	1.04313
D1	42	GAPDH-H	1.26164	1.04613
D1	43	GAPDH-H	1.2581	1.04074
D1	44	GAPDH-H	1.26173	1.04252
D1	45	GAPDH-H	1.26495	1.0439
D2	1	GAPDH-H	0.152896	0.00420506
D2	2	GAPDH-H	0.150826	0.000922066
D2	3	GAPDH-H	0.152628	0.00150995
D2	4	GAPDH-H	0.152376	4.44665e-05
D2	5	GAPDH-H	0.152762	-0.000783156
D2	6	GAPDH-H	0.155659	0.000900543
D2	7	GAPDH-H	0.155745	-0.000226548
D2	8	GAPDH-H	0.157014	-0.000171531
D2	9	GAPDH-H	0.158654	0.000254645
D2	10	GAPDH-H	0.158129	-0.0014836
D2	11	GAPDH-H	0.158373	-0.00245338
D2	12	GAPDH-H	0.161926	-0.000113272
D2	13	GAPDH-H	0.162623	-0.000630534
D2	14	GAPDH-H	0.165902	0.00143583
D2	15	GAPDH-H	0.167397	0.0017166
D2	16	GAPDH-H	0.176611	0.00971745
D2	17	GAPDH-H	0.187269	0.0191614
D2	18	GAPDH-H	0.208851	0.0395297
D2	19	GAPDH-H	0.239998	0.0694638
D2	20	GAPDH-H	0.292792	0.121044
D2	21	GAPDH-H	0.366836	0.193875
D2	22	GAPDH-H	0.470922	0.296747
D2	23	GAPDH-H	0.579166	0.403777
D2	24	GAPDH-H	0.697767	0.521165
D2	25	GAPDH-H	0.802015	0.624199
D2	26	GAPDH-H	0.884688	0.705659
D2	27	GAPDH-H	0.958625	0.778382
D2	28	GAPDH-H	1.01379	0.832332
D2	29	GAPDH-H	1.05929	0.876618
D2	30	GAPDH-H	1.10127	0.917389
D2	31	GAPDH-H	1.12693	0.941838
D2	32	GAPDH-H	1.15048	0.964173
D2	33	GAPDH-H	1.1727	0.985178
D2	34	GAPDH-H	1.18868	0.999941
D2	35	GAPDH-H	1.20088	1.01093
D2	36	GAPDH-H	1.21273	1.02156
D2	37	GAPDH-H	1.22284	1.03046
D2	38	GAPDH-H	1.23106	1.03746
D2	39	GAPDH-H	1.24381	1.04901
D2	40	GAPDH-H	1.25093	1.05491
D2	41	GAPDH-H	1.25145	1.05422
D2	42	GAPDH-H	1.25281	1.05436
D2	43	GAPDH-H	1.25832	1.05866
D2	44	GAPDH-H	1.2576	1.05673
D2	45	GAPDH-H	1.26075	1.05866
D3	1	GAPDH-H	0.149763	0.00584355
D3	2	GAPDH-H	0.149094	0.0038626
D3	3	GAPDH-H	0.149465	0.0029208
D3	4	GAPDH-H	0.148845	0.000989565
D3	5	GAPDH-H	0.149743	0.000574594
D3	6	GAPDH-H	0.149309	-0.0011713
D3	7	GAPDH-H	0.151535	-0.000256806
D3	8	GAPDH-H	0.151289	-0.00181505
D3	9	GAPDH-H	0.153186	-0.00123036
D3	10	GAPDH-H	0.152745	-0.0029838
D3	11	GAPDH-H	0.155353	-0.00168789
D3	12	GAPDH-H	0.157036	-0.00131646
D3	13	GAPDH-H	0.160311	0.000646188
D3	14	GAPDH-H	0.166307	0.00533053
D3	15	GAPDH-H	0.171995	0.00970581
D3	16	GAPDH-H	0.184931	0.0213299
D3	17	GAPDH-H	0.206141	0.0412284
D3	18	GAPDH-H	0.243868	0.0776428
D3	19	GAPDH-H	0.297747	0.130209
D3	20	GAPDH-H	0.377774	0.208925
D3	21	GAPDH-H	0.478702	0.30854
D3	22	GAPDH-H	0.594887	0.423413
D3	23	GAPDH-H	0.709074	0.536289
D3	24	GAPDH-H	0.814498	0.6404
D3	25	GAPDH-H	0.899342	0.723932
D3	26	GAPDH-H	0.968364	0.791642
D3	27	GAPDH-H	1.02448	0.84645
D3	28	GAPDH-H	1.06426	0.884915
D3	29	GAPDH-H	1.09916	0.918502
D3	30	GAPDH-H	1.12815	0.946175
D3	31	GAPDH-H	1.15282	0.969536
D3	32	GAPDH-H	1.1725	0.987907
D3	33	GAPDH-H	1.18917	1.00327
D3	34	GAPDH-H	1.19915	1.01193
D3	35	GAPDH-H	1.21415	1.02562
D3	36	GAPDH-H	1.22307	1.03322
D3	37	GAPDH-H	1.23404	1.04289
D3	38	GAPDH-H	1.23938	1.04692
D3	39	GAPDH-H	1.24534	1.05156
D3	40	GAPDH-H	1.24971	1.05462
D3	41	GAPDH-H	1.25087	1.05446
D3	42	GAPDH-H	1.25691	1.05919
D3	43	GAPDH-H	1.2588	1.05977
D3	44	GAPDH-H	1.25849	1.05815
D3	45	GAPDH-H	1.25931	1.05765
D4	1	GAPDH-H	0.241428	0.0139111
D4	2	GAPDH-H	0.236536	0.0081908
D4	3	GAPDH-H	0.23458	0.00540705
D4	4	GAPDH-H	0.231073	0.00107124
D4	5	GAPDH-H	0.230583	-0.000247685
D4	6	GAPDH-H	0.231679	2.06479e-05
D4	7	GAPDH-H	0.230191	-0.0022961
D4	8	GAPDH-H	0.231002	-0.00231342
D4	9	GAPDH-H	0.231317	-0.00282679
D4	10	GAPDH-H	0.233465	-0.00150763
D4	11	GAPDH-H	0.234402	-0.00139929
D4	12	GAPDH-H	0.233581	-0.00304891
D4	13	GAPDH-H	0.235898	-0.00156005
D4	14	GAPDH-H	0.240835	0.00254846
D4	15	GAPDH-H	0.245267	0.00615249
D4	16	GAPDH-H	0.254271	0.0143281
D4	17	GAPDH-H	0.271845	0.0310734
D4	18	GAPDH-H	0.299612	0.0580117
D4	19	GAPDH-H	0.345798	0.103369
D4	20	GAPDH-H	0.41126	0.168003
D4	21	GAPDH-H	0.502022	0.257936
D4	22	GAPDH-H	0.608827	0.363913
D4	23	GAPDH-H	0.722523	0.47678
D4	24	GAPDH-H	0.831493	0.584922
D4	25	GAPDH-H	0.921434	0.674035
D4	26	GAPDH-H	0.998875	0.750647
D4	27	GAPDH-H	1.06014	0.811082
D4	28	GAPDH-H	1.10263	0.852749
D4	29	GAPDH-H	1.14054	0.889824
D4	30	GAPDH-H	1.16955	0.918005
D4	31	GAPDH-H	1.19468	0.94231
D4	32	GAPDH-H	1.21697	0.963767
D4	33	GAPDH-H	1.23207	0.97804
D4	34	GAPDH-H	1.24917	0.994315
D4	35	GAPDH-H	1.25613	1.00045
D4	36	GAPDH-H	1.27008	1.01357
D4	37	GAPDH-H	1.2769	1.01956
D4	38	GAPDH-H	1.28549	1.02732
D4	39	GAPDH-H	1.29003	1.03103
D4	40	GAPDH-H	1.30048	1.04065
D4	41	GAPDH-H	1.30236	1.0417
D4	42	GAPDH-H	1.30919	1.04771
D4	43	GAPDH-H	1.31064	1.04833
D4	44	GAPDH-H	1.31433	1.05119
D4	45	GAPDH-H	1.30904	1.04507
D5	1	GAPDH-H	0.0978239	0.00578247
D5	2	GAPDH-H	0.0967233	0.00333912
D5	3	GAPDH-H	0.0970541	0.00232717
D5	4	GAPDH-H	0.0961625	9.27869e-05
D5	5	GAPDH-H	0.0979487	0.00053628
D5	6	GAPDH-H	0.0991062	0.000351019
D5	7	GAPDH-H	0.0999372	-0.000160689
D5	8	GAPDH-H	0.100903	-0.000537564
D5	9	GAPDH-H	0.101801	-0.000982031
D5	10	GAPDH-H	0.101534	-0.00259254
D5	11	GAPDH-H	0.103801	-0.00166807
D5	12	GAPDH-H	0.104768	-0.00204341
D5	13	GAPDH-H	0.107318	-0.000836776
D5	14	GAPDH-H	0.110408	0.000910793
D5	15	GAPDH-H	0.115443	0.00460304
D5	16	GAPDH-H	0.12448	0.0122971
D5	17	GAPDH-H	0.138794	0.0252685
D5	18	GAPDH-H	0.161448	0.0465796
D5	19	GAPDH-H	0.202896	0.0866849
D5	20	GAPDH-H	0.262087	0.144533
D5	21	GAPDH-H	0.352211	0.233315
D5	22	GAPDH-H	0.456448	0.336209
D5	23	GAPDH-H	0.577044	0.455462
D5	24	GAPDH-H	0.692678	0.569754
D5	25	GAPDH-H	0.790563	0.666296
D5	26	GAPDH-H	0.872519	0.746909
D5	27	GAPDH-H	0.936304	0.809351
D5	28	GAPDH-H	0.985088	0.856792
D5	29	GAPDH-H	1.02697	0.897327
D5	30	GAPDH-H	1.05921	0.928229
D5	31	GAPDH-H	1.0865	0.954177
D5	32	GAPDH-H	1.10819	0.974525
D5	33	GAPDH-H	1.12682	0.991809
D5	34	GAPDH-H	1.14219	1.00584
D5	35	GAPDH-H	1.15098	1.01329
D5	36	GAPDH-H	1.16566	1.02662
D5	37	GAPDH-H	1.17429	1.03391
D5	38	GAPDH-H	1.17961	1.03789
D5	39	GAPDH-H	1.18789	1.04483
D5	40	GAPDH-H	1.19293	1.04852
D5	41	GAPDH-H	1.19557	1.04982
D5	42	GAPDH-H	1.20095	1.05385
D5	43	GAPDH-H	1.2025	1.05407
D5	44	GAPDH-H	1.20898	1.0592
D5	45	GAPDH-H	1.2047	1.05357
D6	1	GAPDH-H	0.113736	0.00585907
D6	2	GAPDH-H	0.111948	0.00257369
D6	3	GAPDH-H	0.112637	0.00176536
D6	4	GAPDH-H	0.112283	-8.57433e-05
D6	5	GAPDH-H	0.114796	0.000930625
D6	6	GAPDH-H	0.115761	0.000398585
D6	7	GAPDH-H	0.116342	-0.000517496
D6	8	GAPDH-H	0.117529	-0.000828478
D6	9	GAPDH-H	0.118214	-0.00163996
D6	10	GAPDH-H	0.119649	-0.00170191
D6	11	GAPDH-H	0.121295	-0.00155354
D6	12	GAPDH-H	0.12281	-0.00153594
D6	13	GAPDH-H	0.12705	0.00120743
D6	14	GAPDH-H	0.130901	0.00356107
D6	15	GAPDH-H	0.139955	0.0111179
D6	16	GAPDH-H	0.153991	0.0236573
D6	17	GAPDH-H	0.178736	0.0469044
D6	18	GAPDH-H	0.219427	0.0860985
D6	19	GAPDH-H	0.282335	0.147509
D6	20	GAPDH-H	0.369462	0.23314
D6	21	GAPDH-H	0.478753	0.340933
D6	22	GAPDH-H	0.594672	0.455355
D6	23	GAPDH-H	0.704019	0.563205
D6	24	GAPDH-H	0.801717	0.659406
D6	25	GAPDH-H	0.877833	0.734024
D6	26	GAPDH-H	0.940585	0.795279
D6	27	GAPDH-H	0.990127	0.843325
D6	28	GAPDH-H	1.03041	0.882112
D6	29	GAPDH-H	1.06133	0.911532
D6	30	GAPDH-H	1.08466	0.933368
D6	31	GAPDH-H	1.11162	0.958829
D6	32	GAPDH-H	1.12521	0.970925
D6	33	GAPDH-H	1.14289	0.987104
D6	34	GAPDH-H	1.15434	0.997056
D6	35	GAPDH-H	1.16506	1.00628
D6	36	GAPDH-H	1.17517	1.01489
D6	37	GAPDH-H	1.18212	1.02034
D6	38	GAPDH-H	1.18875	1.02548
D6	39	GAPDH-H	1.19741	1.03264
D6	40	GAPDH-H	1.19869	1.03242
D6	41	GAPDH-H	1.2043	1.03654
D6	42	GAPDH-H	1.20566	1.0364
D6	43	GAPDH-H	1.20859	1.03783
D6	44	GAPDH-H	1.21405	1.0418
D6	45	GAPDH-H	1.21052	1.03677
D7	1	VEGFA	0.10445	-0.00247154
D7	2	VEGFA	0.105139	-0.00240349
D7	3	VEGFA	0.109219	0.00105565
D7	4	VEGFA	0.111515	0.0027306
D7	5	VEGFA	0.107803	-0.00160305
D7	6	VEGFA	0.109027	-0.00100004
D7	7	VEGFA	0.113687	0.00303954
D7	8	VEGFA	0.109218	-0.00205038
D7	9	VEGFA	0.111293	-0.000596372
D7	10	VEGFA	0.112066	-0.000444664
D7	11	VEGFA	0.112143	-0.000989115
D7	12	VEGFA	0.111747	-0.00200584
D7	13	VEGFA	0.112567	-0.00180669
D7	14	VEGFA	0.114707	-0.000288182
D7	15	VEGFA	0.114933	-0.000683041
D7	16	VEGFA	0.11756	0.00132301
D7	17	VEGFA	0.120176	0.00331857
D7	18	VEGFA	0.129778	0.0122995
D7	19	VEGFA	0.142896	0.024796
D7	20	VEGFA	0.169931	0.0512106
D7	21	VEGFA	0.215839	0.0964968
D7	22	VEGFA	0.297423	0.17746
D7	23	VEGFA	0.417026	0.296442
D7	24	VEGFA	0.575601	0.454397
D7	25	VEGFA	0.734855	0.61303
D7	26	VEGFA	0.874539	0.752092
D7	27	VEGFA	0.976836	0.853769
D7	28	VEGFA	1.05034	0.926647
D7	29	VEGFA	1.10291	0.9786
D7	30	VEGFA	1.13535	1.01042
D7	31	VEGFA	1.16756	1.04201
D7	32	VEGFA	1.18478	1.05861
D7	33	VEGFA	1.19355	1.06675
D7	34	VEGFA	1.20221	1.0748
D7	35	VEGFA	1.20457	1.07653
D7	36	VEGFA	1.2107	1.08204
D7	37	VEGFA	1.211	1.08172
D7	38	VEGFA	1.21372	1.08382
D7	39	VEGFA	1.21457	1.08405
D7	40	VEGFA	1.21281	1.08166
D7	41	VEGFA	1.21318	1.08142
D7	42	VEGFA	1.21536	1.08297
D7	43	VEGFA	1.21442	1.08142
D7	44	VEGFA	1.21471	1.08108
D7	45	VEGFA	1.21372	1.07947
D8	1	JUN	0.116154	0.00137748
D8	2	JUN	0.115556	1.65873e-05
D8	3	JUN	0.116148	-0.000153429
D8	4	JUN	0.118388	0.00132359
D8	5	JUN	0.119658	0.00183114
D8	6	JUN	0.118846	0.00025558
D8	7	JUN	0.118013	-0.00133965
D8	8	JUN	0.120616	0.000500522
D8	9	JUN	0.119505	-0.00137295
D8	10	JUN	0.12136	-0.000280644
D8	11	JUN	0.121784	-0.000619394
D8	12	JUN	0.12201	-0.00115656
D8	13	JUN	0.121745	-0.00218399
D8	14	JUN	0.124458	-0.000233802
D8	15	JUN	0.12543	-2.45167e-05
D8	16	JUN	0.127199	0.000981772
D8	17	JUN	0.129452	0.00247233
D8	18	JUN	0.13732	0.00957709
D8	19	JUN	0.149215	0.0207089
D8	20	JUN	0.171996	0.0427275
D8	21	JUN	0.214541	0.0845101
D8	22	JUN	0.286699	0.155905
D8	23	JUN	0.398872	0.267316
D8	24	JUN	0.543646	0.411327
D8	25	JUN	0.696173	0.563091
D8	26	JUN	0.835918	0.702073
D8	27	JUN	0.948984	0.814376
D8	28	JUN	1.02855	0.893181
D8	29	JUN	1.09164	0.955507
D8	30	JUN	1.1341	0.997201
D8	31	JUN	1.17129	1.03363
D8	32	JUN	1.19795	1.05953
D8	33	JUN	1.2207	1.08151
D8	34	JUN	1.23659	1.09664
D8	35	JUN	1.25017	1.10946
D8	36	JUN	1.26194	1.12047
D8	37	JUN	1.27408	1.13185
D8	38	JUN	1.27929	1.13629
D8	39	JUN	1.28914	1.14538
D8	40	JUN	1.29226	1.14774
D8	41	JUN	1.29513	1.14984
D8	42	JUN	1.29829	1.15224
D8	43	JUN	1.29838	1.15156
D8	44	JUN	1.30033	1.15275
D8	45	JUN	1.29914	1.1508
D9	1
D9	2
D9	3
D9	4
D9	5
D9	6
D9	7
D9	8
D9	9
D9	10
D9	11
D9	12
D9	13
[truncated: 2,327 more rows]

## Sheet: BioGroup Analysis Result
Block Type	96alum
Chemistry	SYBR_GREEN
Experiment File Name	C:\Users\Administrator\Desktop\20211101-GAT-JXFSS.eds
Experiment Run End Time	Not Started
Instrument Type	sds7500
Passive Reference	ROX
Biogroup Name	Target Name	Task	RQ	RQ Min	RQ Max	Cт Mean	ΔCт Mean	ΔCт SE	ΔΔCт
Analysis Type	Singleplex
Endogenous Control	GAPDH-M
RQ Min/Max Confidence Level	95.0
Reference Biogroup Name
