# Supplementary material for: Regulatory mechanism of Scutellaria baicalensis Georgi on bone cancer pain based on network pharmacology and experimental verification
Source: PeerJ journal article supplement (doi:10.7717/peerj.14394), 2022-11-17
Supplement: Raw_Data.zip [file Baicalein-GAT_data-1.xls]

## Sheet: Sample Setup
Block Type	96alum
Chemistry	SYBR_GREEN
Experiment File Name
Experiment Run End Time	Not Started
Instrument Type	sds7500
Passive Reference	ROX
Well	Sample Name	Sample Color	Biogroup Name	Biogroup Color	Target Name	Target Color	Task	Reporter	Quencher	Comments
A1	0	RGB(132,193,241)			VEGFA	RGB(139,189,249)	UNKNOWN	SYBR	None
A2	0	RGB(132,193,241)			VEGFA	RGB(139,189,249)	UNKNOWN	SYBR	None
A3	0	RGB(132,193,241)			VEGFA	RGB(139,189,249)	UNKNOWN	SYBR	None
A4	0	RGB(132,193,241)			JUN	RGB(208,243,98)	UNKNOWN	SYBR	None
A5	0	RGB(132,193,241)			JUN	RGB(208,243,98)	UNKNOWN	SYBR	None
A6	0	RGB(132,193,241)			JUN	RGB(208,243,98)	UNKNOWN	SYBR	None
A7	0	RGB(132,193,241)			MAPK3	RGB(244,165,230)	UNKNOWN	SYBR	None
A8	0	RGB(132,193,241)			MAPK3	RGB(244,165,230)	UNKNOWN	SYBR	None
A9	0	RGB(132,193,241)			MAPK3	RGB(244,165,230)	UNKNOWN	SYBR	None
A10	0	RGB(132,193,241)			IL-6	RGB(255,191,168)	UNKNOWN	SYBR	None
A11	0	RGB(132,193,241)			IL-6	RGB(255,191,168)	UNKNOWN	SYBR	None
A12	0	RGB(132,193,241)			IL-6	RGB(255,191,168)	UNKNOWN	SYBR	None
B1	20	RGB(132,193,241)			VEGFA	RGB(139,189,249)	UNKNOWN	SYBR	None
B2	20	RGB(132,193,241)			VEGFA	RGB(139,189,249)	UNKNOWN	SYBR	None
B3	20	RGB(132,193,241)			VEGFA	RGB(139,189,249)	UNKNOWN	SYBR	None
B4	20	RGB(132,193,241)			JUN	RGB(208,243,98)	UNKNOWN	SYBR	None
B5	20	RGB(132,193,241)			JUN	RGB(208,243,98)	UNKNOWN	SYBR	None
B6	20	RGB(132,193,241)			JUN	RGB(208,243,98)	UNKNOWN	SYBR	None
B7	20	RGB(132,193,241)			MAPK3	RGB(244,165,230)	UNKNOWN	SYBR	None
B8	20	RGB(132,193,241)			MAPK3	RGB(244,165,230)	UNKNOWN	SYBR	None
B9	20	RGB(132,193,241)			MAPK3	RGB(244,165,230)	UNKNOWN	SYBR	None
B10	20	RGB(132,193,241)			IL-6	RGB(255,191,168)	UNKNOWN	SYBR	None
B11	20	RGB(132,193,241)			IL-6	RGB(255,191,168)	UNKNOWN	SYBR	None
B12	20	RGB(132,193,241)			IL-6	RGB(255,191,168)	UNKNOWN	SYBR	None
C1	40	RGB(168,255,222)			VEGFA	RGB(139,189,249)	UNKNOWN	SYBR	None
C2	40	RGB(168,255,222)			VEGFA	RGB(139,189,249)	UNKNOWN	SYBR	None
C3	40	RGB(168,255,222)			VEGFA	RGB(139,189,249)	UNKNOWN	SYBR	None
C4	40	RGB(168,255,222)			JUN	RGB(208,243,98)	UNKNOWN	SYBR	None
C5	40	RGB(168,255,222)			JUN	RGB(208,243,98)	UNKNOWN	SYBR	None
C6	40	RGB(168,255,222)			JUN	RGB(208,243,98)	UNKNOWN	SYBR	None
C7	40	RGB(168,255,222)			MAPK3	RGB(244,165,230)	UNKNOWN	SYBR	None
C8	40	RGB(168,255,222)			MAPK3	RGB(244,165,230)	UNKNOWN	SYBR	None
C9	40	RGB(168,255,222)			MAPK3	RGB(244,165,230)	UNKNOWN	SYBR	None
C10	40	RGB(168,255,222)			IL-6	RGB(255,191,168)	UNKNOWN	SYBR	None
C11	40	RGB(168,255,222)			IL-6	RGB(255,191,168)	UNKNOWN	SYBR	None
C12	40	RGB(168,255,222)			IL-6	RGB(255,191,168)	UNKNOWN	SYBR	None
D1	80	RGB(223,221,142)			VEGFA	RGB(139,189,249)	UNKNOWN	SYBR	None
D2	80	RGB(223,221,142)			VEGFA	RGB(139,189,249)	UNKNOWN	SYBR	None
D3	80	RGB(223,221,142)			VEGFA	RGB(139,189,249)	UNKNOWN	SYBR	None
D4	80	RGB(223,221,142)			JUN	RGB(208,243,98)	UNKNOWN	SYBR	None
D5	80	RGB(223,221,142)			JUN	RGB(208,243,98)	UNKNOWN	SYBR	None
D6	80	RGB(223,221,142)			JUN	RGB(208,243,98)	UNKNOWN	SYBR	None
D7	80	RGB(223,221,142)			MAPK3	RGB(244,165,230)	UNKNOWN	SYBR	None
D8	80	RGB(223,221,142)			MAPK3	RGB(244,165,230)	UNKNOWN	SYBR	None
D9	80	RGB(223,221,142)			MAPK3	RGB(244,165,230)	UNKNOWN	SYBR	None
D10	80	RGB(223,221,142)			IL-6	RGB(255,191,168)	UNKNOWN	SYBR	None
D11	80	RGB(223,221,142)			IL-6	RGB(255,191,168)	UNKNOWN	SYBR	None
D12	80	RGB(223,221,142)			IL-6	RGB(255,191,168)	UNKNOWN	SYBR	None
E1	160	RGB(247,255,168)			VEGFA	RGB(139,189,249)	UNKNOWN	SYBR	None
E2	160	RGB(247,255,168)			VEGFA	RGB(139,189,249)	UNKNOWN	SYBR	None
E3	160	RGB(247,255,168)			VEGFA	RGB(139,189,249)	UNKNOWN	SYBR	None
E4	160	RGB(247,255,168)			JUN	RGB(208,243,98)	UNKNOWN	SYBR	None
E5	160	RGB(247,255,168)			JUN	RGB(208,243,98)	UNKNOWN	SYBR	None
E6	160	RGB(247,255,168)			JUN	RGB(208,243,98)	UNKNOWN	SYBR	None
E7	160	RGB(247,255,168)			MAPK3	RGB(244,165,230)	UNKNOWN	SYBR	None
E8	160	RGB(247,255,168)			MAPK3	RGB(244,165,230)	UNKNOWN	SYBR	None
E9	160	RGB(247,255,168)			MAPK3	RGB(244,165,230)	UNKNOWN	SYBR	None
E10	160	RGB(247,255,168)			IL-6	RGB(255,191,168)	UNKNOWN	SYBR	None
E11	160	RGB(247,255,168)			IL-6	RGB(255,191,168)	UNKNOWN	SYBR	None
E12	160	RGB(247,255,168)			IL-6	RGB(255,191,168)	UNKNOWN	SYBR	None
F1	0	RGB(132,193,241)			TNF	RGB(139,189,249)	UNKNOWN	SYBR	None
F2	0	RGB(132,193,241)			TNF	RGB(139,189,249)	UNKNOWN	SYBR	None
F3	0	RGB(132,193,241)			TNF	RGB(139,189,249)	UNKNOWN	SYBR	None
F4	20	RGB(132,193,241)			TNF	RGB(139,189,249)	UNKNOWN	SYBR	None
F5	20	RGB(132,193,241)			TNF	RGB(139,189,249)	UNKNOWN	SYBR	None
F6	20	RGB(132,193,241)			TNF	RGB(139,189,249)	UNKNOWN	SYBR	None
F7	40	RGB(168,255,222)			TNF	RGB(139,189,249)	UNKNOWN	SYBR	None
F8	40	RGB(168,255,222)			TNF	RGB(139,189,249)	UNKNOWN	SYBR	None
F9	40	RGB(168,255,222)			TNF	RGB(139,189,249)	UNKNOWN	SYBR	None
F10	80	RGB(223,221,142)			TNF	RGB(139,189,249)	UNKNOWN	SYBR	None
F11	80	RGB(223,221,142)			TNF	RGB(139,189,249)	UNKNOWN	SYBR	None
F12	80	RGB(223,221,142)			TNF	RGB(139,189,249)	UNKNOWN	SYBR	None
G1	160	RGB(247,255,168)			TNF	RGB(139,189,249)	UNKNOWN	SYBR	None
G2	160	RGB(247,255,168)			TNF	RGB(139,189,249)	UNKNOWN	SYBR	None
G3	160	RGB(247,255,168)			TNF	RGB(139,189,249)	UNKNOWN	SYBR	None
G4	0	RGB(132,193,241)			GAPDH	RGB(208,243,98)	UNKNOWN	SYBR	None
G5	0	RGB(132,193,241)			GAPDH	RGB(208,243,98)	UNKNOWN	SYBR	None
G6	0	RGB(132,193,241)			GAPDH	RGB(208,243,98)	UNKNOWN	SYBR	None
G7	20	RGB(132,193,241)			GAPDH	RGB(208,243,98)	UNKNOWN	SYBR	None
G8	20	RGB(132,193,241)			GAPDH	RGB(208,243,98)	UNKNOWN	SYBR	None
G9	20	RGB(132,193,241)			GAPDH	RGB(208,243,98)	UNKNOWN	SYBR	None
G10	40	RGB(168,255,222)			GAPDH	RGB(208,243,98)	UNKNOWN	SYBR	None
G11	40	RGB(168,255,222)			GAPDH	RGB(208,243,98)	UNKNOWN	SYBR	None
G12	40	RGB(168,255,222)			GAPDH	RGB(208,243,98)	UNKNOWN	SYBR	None
H1	80	RGB(223,221,142)			GAPDH	RGB(208,243,98)	UNKNOWN	SYBR	None
H2	80	RGB(223,221,142)			GAPDH	RGB(208,243,98)	UNKNOWN	SYBR	None
H3	80	RGB(223,221,142)			GAPDH	RGB(208,243,98)	UNKNOWN	SYBR	None
H4	160	RGB(247,255,168)			GAPDH	RGB(208,243,98)	UNKNOWN	SYBR	None
H5	160	RGB(247,255,168)			GAPDH	RGB(208,243,98)	UNKNOWN	SYBR	None
H6	160	RGB(247,255,168)			GAPDH	RGB(208,243,98)	UNKNOWN	SYBR	None
H7
H8
H9
H10
H11
H12

## Sheet: Results
Block Type	96alum
Chemistry	SYBR_GREEN
Experiment File Name
Experiment Run End Time	Not Started
Instrument Type	sds7500
Passive Reference	ROX
Well	Sample Name	Target Name	Task	Reporter	Quencher	RQ	RQ Min	RQ Max	Cт	Cт Mean	Cт SD	ΔCт	ΔCт Mean	ΔCт SE	HK Control ΔCт Mean	HK Control ΔCт SE	ΔΔCт	Automatic Ct Threshold	Ct Threshold	Automatic Baseline	Baseline Start	Baseline End	Efficiency	Tm1	Tm2	Tm3	Comments	MTP
A1	0	VEGFA	UNKNOWN	SYBR	None	1	0.937355	1.06683	23.4913	23.4289	0.05728		8.82922	0.0336156			0	TRUE	0.207296	TRUE	3	18	1	84.7811				N
A2	0	VEGFA	UNKNOWN	SYBR	None	1	0.937355	1.06683	23.4166	23.4289	0.05728		8.82922	0.0336156			0	TRUE	0.207296	TRUE	3	18	1	84.7811				N
A3	0	VEGFA	UNKNOWN	SYBR	None	1	0.937355	1.06683	23.3787	23.4289	0.05728		8.82922	0.0336156			0	TRUE	0.207296	TRUE	3	18	1	84.7811				N
A4	0	JUN	UNKNOWN	SYBR	None	1	0.781587	1.27945	29.0041	29.1684	0.221541		14.5688	0.128049			0	TRUE	0.198701	TRUE	3	24	1	88.8838				N
A5	0	JUN	UNKNOWN	SYBR	None	1	0.781587	1.27945	29.0808	29.1684	0.221541		14.5688	0.128049			0	TRUE	0.198701	TRUE	3	24	1	88.8838				N
A6	0	JUN	UNKNOWN	SYBR	None	1	0.781587	1.27945	29.4204	29.1684	0.221541		14.5688	0.128049			0	TRUE	0.198701	TRUE	3	24	1	88.8838				N
A7	0	MAPK3	UNKNOWN	SYBR	None	1	0.97256	1.02821	24.2249	24.2027	0.0227609		9.60311	0.0144579			0	TRUE	0.202752	TRUE	3	19	1	87.1				N
A8	0	MAPK3	UNKNOWN	SYBR	None	1	0.97256	1.02821	24.1794	24.2027	0.0227609		9.60311	0.0144579			0	TRUE	0.202752	TRUE	3	19	1	87.1				N
A9	0	MAPK3	UNKNOWN	SYBR	None	1	0.97256	1.02821	24.204	24.2027	0.0227609		9.60311	0.0144579			0	TRUE	0.202752	TRUE	3	19	1	86.9216				N
A10	0	IL-6	UNKNOWN	SYBR	None	1	0.63044	1.58619	31.3974	31.3568	0.415076		16.7571	0.23972			0	TRUE	0.218132	TRUE	3	26	1	79.9649				N
A11	0	IL-6	UNKNOWN	SYBR	None	1	0.63044	1.58619	31.75	31.3568	0.415076		16.7571	0.23972			0	TRUE	0.218132	TRUE	3	27	1	79.9649				N
A12	0	IL-6	UNKNOWN	SYBR	None	1	0.63044	1.58619	30.9229	31.3568	0.415076		16.7571	0.23972			0	TRUE	0.218132	TRUE	3	26	1	79.7865				N
B1	20	VEGFA	UNKNOWN	SYBR	None	1.673	1.57217	1.7803	22.2055	22.1514	0.0473969		8.08679	0.0323015			-0.742436	TRUE	0.207296	TRUE	3	17	1	84.7811				N
B2	20	VEGFA	UNKNOWN	SYBR	None	1.673	1.57217	1.7803	22.1173	22.1514	0.0473969		8.08679	0.0323015			-0.742436	TRUE	0.207296	TRUE	3	17	1	84.9595				N
B3	20	VEGFA	UNKNOWN	SYBR	None	1.673	1.57217	1.7803	22.1314	22.1514	0.0473969		8.08679	0.0323015			-0.742436	TRUE	0.207296	TRUE	3	17	1	84.9595				N
B4	20	JUN	UNKNOWN	SYBR	None	2.82398	2.18018	3.6579	26.9347	27.1357	0.230964		13.0711	0.134447			-1.49773	TRUE	0.198701	TRUE	3	22	1	89.0622				N
B5	20	JUN	UNKNOWN	SYBR	None	2.82398	2.18018	3.6579	27.0843	27.1357	0.230964		13.0711	0.134447			-1.49773	TRUE	0.198701	TRUE	3	22	1	89.0622				N
B6	20	JUN	UNKNOWN	SYBR	None	2.82398	2.18018	3.6579	27.388	27.1357	0.230964		13.0711	0.134447			-1.49773	TRUE	0.198701	TRUE	3	22	1	89.0622				N
B7	20	MAPK3	UNKNOWN	SYBR	None	1.61024	1.55688	1.66543	22.9867	22.9805	0.00601532		8.91583	0.0175108			-0.687275	TRUE	0.202752	TRUE	3	18	1	87.2784				N
B8	20	MAPK3	UNKNOWN	SYBR	None	1.61024	1.55688	1.66543	22.98	22.9805	0.00601532		8.91583	0.0175108			-0.687275	TRUE	0.202752	TRUE	3	18	1	87.1				N
B9	20	MAPK3	UNKNOWN	SYBR	None	1.61024	1.55688	1.66543	22.9747	22.9805	0.00601532		8.91583	0.0175108			-0.687275	TRUE	0.202752	TRUE	3	18	1	87.1				N
B10	20	IL-6	UNKNOWN	SYBR	None	1.92681	1.61891	2.29326	29.9679	29.8756	0.153857		15.8109	0.0904723			-0.946211	TRUE	0.218132	TRUE	3	25	1	80.1432				N
B11	20	IL-6	UNKNOWN	SYBR	None	1.92681	1.61891	2.29326	29.9608	29.8756	0.153857		15.8109	0.0904723			-0.946211	TRUE	0.218132	TRUE	3	25	1	79.9649				N
B12	20	IL-6	UNKNOWN	SYBR	None	1.92681	1.61891	2.29326	29.6979	29.8756	0.153857		15.8109	0.0904723			-0.946211	TRUE	0.218132	TRUE	3	24	1	79.7865				N
C1	40	VEGFA	UNKNOWN	SYBR	None	2.03675	1.9048	2.17783	22.2563	22.1978	0.0506922		7.80296	0.0348015			-1.02627	TRUE	0.207296	TRUE	3	17	1	84.9595				N
C2	40	VEGFA	UNKNOWN	SYBR	None	2.03675	1.9048	2.17783	22.1664	22.1978	0.0506922		7.80296	0.0348015			-1.02627	TRUE	0.207296	TRUE	3	17	1	84.9595				N
C3	40	VEGFA	UNKNOWN	SYBR	None	2.03675	1.9048	2.17783	22.1707	22.1978	0.0506922		7.80296	0.0348015			-1.02627	TRUE	0.207296	TRUE	3	17	1	84.9595				N
C4	40	JUN	UNKNOWN	SYBR	None	4.67926	3.50316	6.2502	26.4507	26.7373	0.25848		12.3425	0.150417			-2.22628	TRUE	0.198701	TRUE	3	21	1	89.0622				N
C5	40	JUN	UNKNOWN	SYBR	None	4.67926	3.50316	6.2502	26.8084	26.7373	0.25848		12.3425	0.150417			-2.22628	TRUE	0.198701	TRUE	3	22	1	89.0622				N
C6	40	JUN	UNKNOWN	SYBR	None	4.67926	3.50316	6.2502	26.9528	26.7373	0.25848		12.3425	0.150417			-2.22628	TRUE	0.198701	TRUE	3	22	1	89.0622				N
C7	40	MAPK3	UNKNOWN	SYBR	None	2.29647	2.14258	2.4614	22.8416	22.7985	0.0532262		8.40369	0.0360405			-1.19942	TRUE	0.202752	TRUE	3	18	1	87.2784				N
C8	40	MAPK3	UNKNOWN	SYBR	None	2.29647	2.14258	2.4614	22.739	22.7985	0.0532262		8.40369	0.0360405			-1.19942	TRUE	0.202752	TRUE	3	17	1	87.2784				N
C9	40	MAPK3	UNKNOWN	SYBR	None	2.29647	2.14258	2.4614	22.8149	22.7985	0.0532262		8.40369	0.0360405			-1.19942	TRUE	0.202752	TRUE	3	18	1	87.1				N
C10	40	IL-6	UNKNOWN	SYBR	None	2.82861	2.13048	3.7555	29.5756	29.6519	0.253001		15.2571	0.147279			-1.50009	TRUE	0.218132	TRUE	3	24	1	80.1432				N
C11	40	IL-6	UNKNOWN	SYBR	None	2.82861	2.13048	3.7555	29.9342	29.6519	0.253001		15.2571	0.147279			-1.50009	TRUE	0.218132	TRUE	3	25	1	79.9649				N
C12	40	IL-6	UNKNOWN	SYBR	None	2.82861	2.13048	3.7555	29.4458	29.6519	0.253001		15.2571	0.147279			-1.50009	TRUE	0.218132	TRUE	3	24	1	79.7865				N
D1	80	VEGFA	UNKNOWN	SYBR	None	3.09623	2.43363	3.93923	21.9228	21.9329	0.0124052		7.19871	0.125125			-1.63051	TRUE	0.207296	TRUE	3	17	1	85.1378				N
D2	80	VEGFA	UNKNOWN	SYBR	None	3.09623	2.43363	3.93923	21.9291	21.9329	0.0124052		7.19871	0.125125			-1.63051	TRUE	0.207296	TRUE	3	17	1	85.1378				N
D3	80	VEGFA	UNKNOWN	SYBR	None	3.09623	2.43363	3.93923	21.9467	21.9329	0.0124052		7.19871	0.125125			-1.63051	TRUE	0.207296	TRUE	3	17	1	85.1378				N
D4	80	JUN	UNKNOWN	SYBR	None	6.20063	4.27805	8.98723	26.3785	26.6705	0.254496		11.9364	0.192859			-2.63241	TRUE	0.198701	TRUE	3	21	1	89.2405				N
D5	80	JUN	UNKNOWN	SYBR	None	6.20063	4.27805	8.98723	26.7877	26.6705	0.254496		11.9364	0.192859			-2.63241	TRUE	0.198701	TRUE	3	22	1	89.2405				N
D6	80	JUN	UNKNOWN	SYBR	None	6.20063	4.27805	8.98723	26.8453	26.6705	0.254496		11.9364	0.192859			-2.63241	TRUE	0.198701	TRUE	3	22	1	89.2405				N
D7	80	MAPK3	UNKNOWN	SYBR	None	2.60866	2.05084	3.3182	22.9462	22.9539	0.00835242		8.2198	0.125013			-1.38331	TRUE	0.202752	TRUE	3	17	1	87.2784				N
D8	80	MAPK3	UNKNOWN	SYBR	None	2.60866	2.05084	3.3182	22.9628	22.9539	0.00835242		8.2198	0.125013			-1.38331	TRUE	0.202752	TRUE	3	18	1	87.2784				N
D9	80	MAPK3	UNKNOWN	SYBR	None	2.60866	2.05084	3.3182	22.9529	22.9539	0.00835242		8.2198	0.125013			-1.38331	TRUE	0.202752	TRUE	3	18	1	87.1				N
D10	80	IL-6	UNKNOWN	SYBR	None	4.97188	3.44746	7.17037	29.4447	29.1775	0.248567		14.4434	0.190264			-2.31379	TRUE	0.218132	TRUE	3	24	1	80.3216				N
D11	80	IL-6	UNKNOWN	SYBR	None	4.97188	3.44746	7.17037	29.1345	29.1775	0.248567		14.4434	0.190264			-2.31379	TRUE	0.218132	TRUE	3	24	1	80.1432				N
D12	80	IL-6	UNKNOWN	SYBR	None	4.97188	3.44746	7.17037	28.9532	29.1775	0.248567		14.4434	0.190264			-2.31379	TRUE	0.218132	TRUE	3	24	1	79.9649				N
E1	160	VEGFA	UNKNOWN	SYBR	None	3.0764	2.87806	3.2884	22.0345	22.0626	0.0598399		7.20798	0.0346286			-1.62124	TRUE	0.207296	TRUE	3	17	1	85.1378				N
E2	160	VEGFA	UNKNOWN	SYBR	None	3.0764	2.87806	3.2884	22.1314	22.0626	0.0598399		7.20798	0.0346286			-1.62124	TRUE	0.207296	TRUE	3	17	1	85.1378				N
E3	160	VEGFA	UNKNOWN	SYBR	None	3.0764	2.87806	3.2884	22.022	22.0626	0.0598399		7.20798	0.0346286			-1.62124	TRUE	0.207296	TRUE	3	17	1	85.1378				N
E4	160	JUN	UNKNOWN	SYBR	None	8.99608	5.26966	15.3576	25.7672	26.2542	0.481328		11.3995	0.277905			-3.1693	TRUE	0.198701	TRUE	3	20	1	89.2405				N
E5	160	JUN	UNKNOWN	SYBR	None	8.99608	5.26966	15.3576	26.2656	26.2542	0.481328		11.3995	0.277905			-3.1693	TRUE	0.198701	TRUE	3	21	1	89.2405				N
E6	160	JUN	UNKNOWN	SYBR	None	8.99608	5.26966	15.3576	26.7297	26.2542	0.481328		11.3995	0.277905			-3.1693	TRUE	0.198701	TRUE	3	21	1	89.2405				N
E7	160	MAPK3	UNKNOWN	SYBR	None	1.78471	1.71754	1.8545	23.6533	23.6221	0.0342848		8.76742	0.0199337			-0.835687	TRUE	0.202752	TRUE	3	19	1	87.2784				N
E8	160	MAPK3	UNKNOWN	SYBR	None	1.78471	1.71754	1.8545	23.5854	23.6221	0.0342848		8.76742	0.0199337			-0.835687	TRUE	0.202752	TRUE	3	18	1	87.2784				N
E9	160	MAPK3	UNKNOWN	SYBR	None	1.78471	1.71754	1.8545	23.6276	23.6221	0.0342848		8.76742	0.0199337			-0.835687	TRUE	0.202752	TRUE	3	18	1	87.1				N
E10	160	IL-6	UNKNOWN	SYBR	None	5.38826	5.10039	5.69237	29.139	29.182	0.0492469		14.3273	0.0285299			-2.42982	TRUE	0.218132	TRUE	3	24	1	80.3216				N
E11	160	IL-6	UNKNOWN	SYBR	None	5.38826	5.10039	5.69237	29.1712	29.182	0.0492469		14.3273	0.0285299			-2.42982	TRUE	0.218132	TRUE	3	24	1	79.9649				N
E12	160	IL-6	UNKNOWN	SYBR	None	5.38826	5.10039	5.69237	29.2357	29.182	0.0492469		14.3273	0.0285299			-2.42982	TRUE	0.218132	TRUE	3	24	1	79.7865				N
F1	0	TNF	UNKNOWN	SYBR	None	1	0.900647	1.11031	36.028	35.9809	0.0665421		21.3813	0.047437			0	TRUE	0.195105	TRUE	3	31	1	88.1703	78.0027			Y
F2	0	TNF	UNKNOWN	SYBR	None	1	0.900647	1.11031	35.9339	35.9809	0.0665421		21.3813	0.047437			0	TRUE	0.195105	TRUE	3	31	1	86.7432				N
F4	20	TNF	UNKNOWN	SYBR	None	1.4122	1.34645	1.48117	34.9349	34.948	0.0185824		20.8834	0.0216152			-0.497947	TRUE	0.195105	TRUE	3	30	1	87.2784	78.1811			Y
F6	20	TNF	UNKNOWN	SYBR	None	1.4122	1.34645	1.48117	34.9611	34.948	0.0185824		20.8834	0.0216152			-0.497947	TRUE	0.195105	TRUE	3	30	1	85.3162				N
F8	40	TNF	UNKNOWN	SYBR	None	8.51559	6.97007	10.4038	32.5972	32.686	0.125604		18.2912	0.0907899			-3.09011	TRUE	0.195105	TRUE	3	27	1	78.7162	86.0297			Y
F9	40	TNF	UNKNOWN	SYBR	None	8.51559	6.97007	10.4038	32.7748	32.686	0.125604		18.2912	0.0907899			-3.09011	TRUE	0.195105	TRUE	3	28	1	84.4243	78.5378			Y
F10	80	TNF	UNKNOWN	SYBR	None	11.4301	6.59038	19.824	32.8168	32.6007	0.305634		17.8665	0.249622			-3.51477	TRUE	0.195105	TRUE	3	27	1	84.7811	78.3595			Y
F11	80	TNF	UNKNOWN	SYBR	None	11.4301	6.59038	19.824	32.3846	32.6007	0.305634		17.8665	0.249622			-3.51477	TRUE	0.195105	TRUE	3	27	1	78.8946	85.673			Y
G2	160	TNF	UNKNOWN	SYBR	None	6.5561	5.1489	8.34789	33.6326	33.5231	0.154863		18.6685	0.10953			-2.71284	TRUE	0.195105	TRUE	3	29	1	84.7811				N
G3	160	TNF	UNKNOWN	SYBR	None	6.5561	5.1489	8.34789	33.4136	33.5231	0.154863		18.6685	0.10953			-2.71284	TRUE	0.195105	TRUE	3	28	1	84.4243				N
G4	0	GAPDH	UNKNOWN	SYBR	None				14.5899	14.5996	0.0104418							TRUE	0.173122	TRUE	3	10	1	85.4946				N
G5	0	GAPDH	UNKNOWN	SYBR	None				14.5984	14.5996	0.0104418							TRUE	0.173122	TRUE	3	10	1	85.4946				N
G6	0	GAPDH	UNKNOWN	SYBR	None				14.6106	14.5996	0.0104418							TRUE	0.173122	TRUE	3	10	1	85.4946				N
G7	20	GAPDH	UNKNOWN	SYBR	None				14.0454	14.0646	0.029727							TRUE	0.173122	TRUE	3	9	1	85.4946				N
G8	20	GAPDH	UNKNOWN	SYBR	None				14.0989	14.0646	0.029727							TRUE	0.173122	TRUE	3	9	1	85.4946				N
G9	20	GAPDH	UNKNOWN	SYBR	None				14.0496	14.0646	0.029727							TRUE	0.173122	TRUE	3	9	1	85.4946				N
G10	40	GAPDH	UNKNOWN	SYBR	None				14.3606	14.3948	0.0326148							TRUE	0.173122	TRUE	3	9	1	85.3162				N
G11	40	GAPDH	UNKNOWN	SYBR	None				14.4255	14.3948	0.0326148							TRUE	0.173122	TRUE	3	9	1	85.1378				N
G12	40	GAPDH	UNKNOWN	SYBR	None				14.3983	14.3948	0.0326148							TRUE	0.173122	TRUE	3	10	1	84.9595				N
H1	80	GAPDH	UNKNOWN	SYBR	None				14.9369	14.7341	0.216368							TRUE	0.173122	TRUE	3	10	1	85.1378				N
H2	80	GAPDH	UNKNOWN	SYBR	None				14.7593	14.7341	0.216368							TRUE	0.173122	TRUE	3	10	1	85.1378				N
H3	80	GAPDH	UNKNOWN	SYBR	None				14.5063	14.7341	0.216368							TRUE	0.173122	TRUE	3	9	1	85.3162				N
H4	160	GAPDH	UNKNOWN	SYBR	None				14.856	14.8547	0.00407545							TRUE	0.173122	TRUE	3	10	1	85.3162				N
H5	160	GAPDH	UNKNOWN	SYBR	None				14.8501	14.8547	0.00407545							TRUE	0.173122	TRUE	3	10	1	85.3162				N
H6	160	GAPDH	UNKNOWN	SYBR	None				14.8579	14.8547	0.00407545							TRUE	0.173122	TRUE	3	10	1	85.3162				N
Analysis Type	Singleplex
Endogenous Control	GAPDH
RQ Min/Max Confidence Level	95.0
Reference Sample	0

## Sheet: Raw Data
Block Type	96alum
Chemistry	SYBR_GREEN
Experiment File Name
Experiment Run End Time	Not Started
Instrument Type	sds7500
Passive Reference	ROX
Well	Cycle	1	2	3	4	5
A1	1	110240	13816.2	36907.7	286444	4187.64
A2	1	106138	15277	45287.6	327716	5823.35
A3	1	73665	10180.4	44623.8	320214	3472.65
A4	1	62044.5	8085.47	44387.1	314282	1866.53
A5	1	56780.5	7711.55	46627.4	321530	1775.8
A6	1	65215.9	9460.95	49876.1	332986	2721.6
A7	1	56634.5	7276.54	47364.8	322614	2001.81
A8	1	63655.1	8007.29	47888.9	331092	2349.63
A9	1	67077.8	9086.29	45047.1	312761	3085.88
A10	1	66968	8561.03	39693.2	288217	2302.79
A11	1	76054.6	9701.3	38612.6	296971	2691.84
A12	1	75481.8	9522.76	30995.5	254055	3035.21
B1	1	100914	13131.2	37877.6	285444	3831.89
B2	1	70960.3	9820.27	43535.8	319906	3213.72
B3	1	61689.2	7987.25	42842.2	301484	1892.63
B4	1	56530.3	7099.57	45156.9	308163	1796.45
B5	1	57255.9	7914.06	45232.7	294998	2105.46
B6	1	55523.7	7208.49	47390.3	307938	1434.13
B7	1	56050.2	7111.14	49787.6	324243	1557.76
B8	1	59545.6	12715.6	59804.3	337544	2052.28
B9	1	56644.9	7410.42	48078.1	327373	1764.99
B10	1	55008.6	6822.07	43877.2	314378	2118.9
B11	1	58275.1	7539.07	39143.3	296192	1896.36
B12	1	60105.8	7209.66	32253.2	264357	1570.31
C1	1	109314	13394.5	42908.4	314613	3092.79
C2	1	67986.4	8522.38	42614	305266	2495.35
C3	1	55735.8	6999.46	44462.1	303095	2451.68
C4	1	57743.1	7720.48	46564.1	304206	1898.26
C5	1	53723.9	7577.04	49487.1	314691	2071.53
C6	1	52032.8	7077.76	47789.6	299815	1627.2
C7	1	176922	20336.4	58265.7	329206	3155.44
C8	1	56910.2	7504.07	49947.7	317323	2004.44
C9	1	56649.5	7300.36	50698	335272	1867.42
C10	1	53660.3	6830.39	45633.2	316387	1919.98
C11	1	56249.8	6845.27	43809.7	325570	1707.78
C12	1	60982.6	7236.22	36973.8	291819	2003.39
D1	1	60837.9	7893.65	40821.7	315847	2048.58
D2	1	65433.9	8961.4	43762	305917	2416
D3	1	56073.6	7233.81	45658.4	305805	1918.86
D4	1	63501.1	8772.08	46987.5	297884	2511.93
D5	1	56234.8	7734.8	50226.9	314049	1770.63
D6	1	52809.2	7360.16	51924.5	319987	1250.19
D7	1	54446.1	7150.6	53366.1	328929	1638.34
D8	1	53656.8	7137.58	52852.9	333027	2089.92
D9	1	63232.3	8407.31	50961.1	325035	2280.35
D10	1	91896.6	15975.3	55311	330978	4900.48
D11	1	59029	7367.03	42459.7	305732	1722.67
D12	1	64923.3	7880.7	40358.8	312778	1991.4
E1	1	86630.2	10847.7	41750.7	309600	3109.49
E2	1	63017.4	8245.1	41558.8	295839	2495.19
E3	1	61105.8	9079.11	46068	297049	2323.62
E4	1	60577.4	7923.55	47803.4	301325	2249.66
E5	1	62401.1	8921.06	53684	323487	1714.78
E6	1	52087.4	7326.94	53060.2	328161	2245.96
E7	1	56478.9	7563.84	55253.1	338645	1541.14
E8	1	53568.4	7237.87	52646.4	328357	1679.55
E9	1	53615.2	6922.81	50488	324455	1766.62
E10	1	56972	7515.14	48127.8	322635	1948.04
E11	1	69123.9	9350.32	47005.1	332148	2792.38
E12	1	81167.2	10696.8	41490.8	308964	3568.72
F1	1	67749.8	8805.91	38827.3	300255	2620.13
F2	1	59433.2	7778.34	40853.1	297470	2314.5
F3	1	52211.4	7019.09	43924.6	298536	2225.4
F4	1	59186.5	8618.23	47717.3	301474	3661.29
F5	1	65496.2	9274.9	51220.8	318164	2638.63
F6	1	63038.8	9001.71	52329.5	321935	2111.74
F7	1	54873.2	6983.87	52962.6	330141	1706.72
F8	1	60191.8	8372.96	52385.7	328922	2791.38
F9	1	55325.6	7048.34	49519.4	323348	2216.76
F10	1	63211.3	7785.22	47814.6	325379	2072.98
F11	1	61340.6	7664.19	44934.3	326583	2185.52
F12	1	77149.9	9437.57	40928.9	315181	2323.72
G1	1	82434.2	10416.4	39854.3	309259	3323.43
G2	1	76295.2	9453.58	43001.3	307386	2610.36
G3	1	50069.1	6303.17	42419.4	302839	2199.29
G4	1	52220.5	7054.21	45635.6	308909	2141.27
G5	1	56193.6	7738.63	50715.2	332456	2078.18
G6	1	58625.4	7749.65	50120	321689	2312.16
G7	1	56744.8	7713.77	46417	296329	1567.24
G8	1	54485.3	7727.41	51570.9	341362	8586.52
G9	1	56534.3	7762.36	48701.2	327416	2273.18
G10	1	57409.2	7392.51	44356.7	312699	1768.2
G11	1	89093.6	12436.4	45656.7	326490	3190.82
G12	1	78490.6	10025.9	41912.3	327243	1902.73
H1	1	84611.4	9429.39	36148.4	299576	5134.67
H2	1	88953.7	12779.2	41350.9	306671	3210.01
H3	1	58507.9	7607.54	42775.4	316284	2166.71
H4	1	56858.7	7052.94	43594	307125	2388.02
H5	1	63037.9	8466.56	49227.2	336445	2207.64
H6	1	60745.6	8076.6	46871.4	313590	2257.73
H7	1	60266	6775.19	4121.44	5246.15	1697.99
H8	1	74172.3	10593.4	7169.41	9634.45	3713.08
H9	1	52240.9	5611.92	3238.08	4016.84	1181.13
H10	1	57633.9	6281.41	3591.19	4708.25	1620.64
H11	1	66499.9	7129.7	4132.34	5388.25	1790.63
H12	1	76703.7	7727.33	4058.47	6469.31	1998.73
A1	2	113921	14322.4	37867.3	293728	4557.65
A2	2	108322	15869.1	46425	336229	6343.08
A3	2	74368.7	10150.8	45912.4	327673	3143.01
A4	2	62392.4	8305.13	45553.6	322482	2083.04
A5	2	56867.9	7784.16	47679.5	328859	1958.05
A6	2	66548.5	9927.51	51122	341780	3123.23
A7	2	57079.8	7360.49	48640.4	330862	1913.94
A8	2	64131.8	8143.74	49105.2	338972	1989.2
A9	2	67483	9282.19	45965.1	320349	2925.91
A10	2	67383.4	8573.65	40582.1	296198	2334.92
A11	2	75544.5	9362.46	39384.2	303405	1833.85
A12	2	75780.2	9520.61	31742.5	259074	2951.74
B1	2	100351	12661.5	38806.2	292681	3405.56
B2	2	72074.4	9967.71	44556.6	327787	2665.58
B3	2	61948.9	7869.62	43387.6	306437	1880.64
B4	2	56519	7279.93	45907.5	313104	1643.8
B5	2	57543.6	7793.6	46022.6	299917	1860.69
B6	2	55501.7	7356.6	48045.5	313936	1977.56
B7	2	55803.8	7398.6	50474.5	329930	1859.55
B8	2	60019.1	12753.7	60918.3	344078	1854.12
B9	2	57053	7510.45	49063.9	334274	1987.14
B10	2	54971	6906.12	44867.4	321739	1960.02
B11	2	58525.5	7478.35	39573.8	301141	1826.54
B12	2	60411.1	7444.94	32817.5	269838	1887.82
C1	2	111150	13931.4	43851.3	322694	2987.37
C2	2	68396.7	9087.06	43362.2	310240	2076.04
C3	2	56183.9	7443.12	44987.1	307974	1929.18
C4	2	57922	7847.96	47558	310554	1892.73
C5	2	54163	7430.18	50492.2	320671	2008.23
C6	2	52648.8	7263.6	48345	303889	1847.36
C7	2	177566	20408.3	59078.6	334455	2880.68
C8	2	57417.1	7454.55	50952	323625	1824.68
C9	2	57046.8	7375.4	51686.5	341990	1795.43
C10	2	54123.2	7094.73	46597.9	323777	1814.42
C11	2	57065.9	6845.27	44881.7	333530	1655.3
C12	2	61450.2	7649.98	37547.4	297791	1518.72
D1	2	61497.3	7704.31	41501.2	322210	2023.13
D2	2	66200.6	9047.43	44428.3	311111	2188.67
D3	2	56544.5	7548.84	46321.1	311142	2306.74
D4	2	63862.1	8841.05	47812.7	302809	2528.45
D5	2	56998.3	7831.03	51619.6	321135	1463.18
D6	2	53318.6	7292.79	52658.6	324714	1292.59
D7	2	55077.8	7284.04	54222.1	333466	1100.65
D8	2	53863.1	7438.98	53792.6	338467	2236.02
D9	2	63599.1	8590.34	51755.4	331794	2109.09
D10	2	92687.6	16449.1	56154.7	336228	5337.21
D11	2	59843.9	7828.57	43436	312721	1799.98
D12	2	65865.2	8275.56	41051.6	318358	2077.73
E1	2	86193.5	11168	42297	315379	2880.37
E2	2	63611.7	8196.92	42515.8	301061	2560.57
E3	2	61805.8	9231.33	46723.4	303023	2266.29
E4	2	60915.6	8127.11	48784.6	308758	2005.7
E5	2	62907.1	9307.63	54796.5	330362	1800.79
E6	2	52283.7	7571.83	54154.7	334297	2089.09
E7	2	56955.8	7699.31	56711.1	346658	1632.76
E8	2	53783.7	7591.75	53703.7	335927	1286.31
E9	2	54063.4	7162.31	51432.2	332402	1891.44
E10	2	57406.8	7646.12	49363.9	329691	2686.62
E11	2	69554.9	9409.38	47890.9	338838	2038.23
E12	2	81448	10764.7	42175.4	315156	3136.21
F1	2	67698	8990.36	39967.1	307004	2349.88
F2	2	59567.2	8028.26	41810.3	302410	2682.44
F3	2	51818.2	7261.77	44571.1	304296	2116.37
F4	2	59730.7	8789.21	48834.4	308845	3400.17
F5	2	65760.5	9188.93	52386.2	325432	2536.36
F6	2	63913.8	8976.13	53546.1	329183	2584.01
F7	2	55016.9	7360.1	54258.2	338860	1981.59
F8	2	60408.9	8746.49	53743.6	337153	2747.93
F9	2	55561.7	7146.96	50493.9	330493	1948.48
F10	2	63178.6	8096.77	48889.9	332118	2292.62
F11	2	62369.5	7642.57	45794.9	334872	2587.99
F12	2	77873.6	9637.21	41662.6	320956	2769.13
G1	2	83574.8	11005	40629.8	317136	3373.22
G2	2	75786.2	9703.54	43795.3	314352	2500.4
G3	2	50821.5	6444.76	43234.1	308220	1998.47
G4	2	53136.9	6968.3	46393.8	314818	2313.77
G5	2	56992.5	7963.85	51610	339801	2197.86
G6	2	59481	8165.3	51348.1	329674	2063.56
G7	2	57723.5	7913.17	47474.1	304031	1642.42
G8	2	55311	7461.5	53049.5	349060	9096.66
G9	2	57408.7	7699.78	49661.3	335172	1904.44
G10	2	58111.6	7490.78	45431.8	321176	1581.39
G11	2	91097.9	12878.7	46633.1	332838	3469.75
G12	2	79421.9	10225.2	42115.5	329839	2153.05
H1	2	85956.2	9561.67	36776.9	304746	4602.1
H2	2	89209.9	12616.3	41769	313112	3189.42
H3	2	58349.5	7766.25	43647.6	323620	2373.37
H4	2	57684	7421.28	44554.5	313707	2375.18
H5	2	63309.2	8901.36	50442.4	343672	2321.24
H6	2	61163.5	8166.78	47669.7	319198	1804.7
H7	2	60355.2	6719.78	4187.01	5274.56	1534.3
H8	2	73739.7	10463.5	6856.89	9368.86	3837.42
H9	2	52167.3	5583.77	3080.56	4038.52	1622.14
H10	2	57214.6	6412.51	3650.85	4703.97	1212.24
H11	2	66113.5	7209.21	4242.23	5755.04	1954.82
H12	2	75512.5	7301.48	4237	6389.14	1562.78
A1	3	115745	14452.1	38386.7	297785	4418.73
A2	3	109136	15895	46923.8	340698	6309.21
A3	3	74643.6	10059.2	46152.5	332097	3545.35
A4	3	63217.2	8180.72	46081.4	327021	1986.13
A5	3	57728.7	7787	48007	332648	1980.64
A6	3	67442.2	9848.61	51748.9	345999	2887.77
A7	3	57293	7501.98	49190	335630	1898.35
A8	3	64613.4	8170.76	49722.4	343331	2119.22
A9	3	68101.9	9265.44	46504.6	324803	3155.96
A10	3	67508.6	8713.33	40854.6	299532	2634.25
A11	3	75387.6	9578.27	39763.8	306684	2303.2
A12	3	75797.3	9515.25	31695.1	262385	3279.96
B1	3	101759	12974.2	39119.1	296030	3667.92
B2	3	72782.2	10082.1	45161	332157	2983.1
B3	3	62394.9	8099.38	43566	308606	2043.05
B4	3	57269.8	7430.76	46186.9	315836	1932.68
B5	3	58652.6	8025.53	46106.9	302419	2006.46
B6	3	56333.3	7373.86	48439.5	315858	1628.8
B7	3	56381.6	7241.38	50883.3	332831	1735.9
B8	3	60315.6	12738.8	61022.6	347294	1980.77
B9	3	57820.7	7693.98	49379.9	337684	1819.51
B10	3	55069.7	6911.27	45026.8	324748	2159.27
B11	3	59454.6	7579.55	39997.8	304049	1848.24
B12	3	60926.9	7571.96	33050.2	271676	1527.74
C1	3	112239	14289.7	44305.4	325992	3588.15
C2	3	69063.4	8995.71	43799.4	313287	2637.78
C3	3	56980.2	7436.64	45391.7	310209	2172.76
C4	3	58629.2	7837.26	47813	313524	1928.7
C5	3	54911.7	7466.3	50663.6	324142	2265.53
C6	3	52909.9	7287.17	48566.6	306236	1604.6
C7	3	177230	20283.5	59370.9	337458	3038.34
C8	3	57863	7605.54	51218.6	325128	2177.46
C9	3	57962.9	7566.98	51901.7	344570	1858.42
C10	3	54952.8	7188.88	46987.8	326562	1770.21
C11	3	57629.8	7198.49	45007.6	335307	2029.22
C12	3	61917.9	7854.92	37792.1	300483	2135.34
D1	3	61673.9	7729.73	42021	325587	1671.6
D2	3	66398	9251.92	44392.7	312732	2815.04
D3	3	56962.2	7482.18	46469.2	313419	2192.21
D4	3	64878.1	8869.03	48388.9	306901	2616.2
D5	3	57861.3	8073.82	52046.6	325812	2056.78
D6	3	53992.7	7395	53082.6	327130	1587
D7	3	55789.7	7599.8	54469.6	337096	1472.96
D8	3	54761.3	7335.05	54265.6	341708	2301.05
D9	3	64171.6	8564.87	51954.2	334518	2266.16
D10	3	92712.6	16129.4	56370.6	338826	5296.12
D11	3	60291	7494.81	43753.7	315661	1690
D12	3	67182.4	8278.49	41376.3	320863	2348.95
E1	3	86343.7	11205.4	42748.7	318661	2862.31
E2	3	64936.9	8387.26	42911.6	303438	2586.72
E3	3	62393	9298.48	47084.6	305501	2313.5
E4	3	61936.9	8486.92	49084.9	312321	1958.48
E5	3	63703.8	9537.52	55454.5	333298	1565.35
E6	3	52809	7491.41	54358.7	336435	2296.66
E7	3	57571	7666.83	57511.8	351259	1252.78
E8	3	54787.6	7843.8	54329.9	339530	1570.89
E9	3	54572.6	7076.39	51759.4	335710	1509.52
E10	3	58036	7928.33	49584.8	332441	2526.2
E11	3	70263.6	9642.38	48095.7	342034	2286.79
E12	3	81953.3	10883.1	42724.3	317774	3560.3
F1	3	68323.3	8819.88	40300.9	310742	2428.38
F2	3	60362	8105.95	42080.6	305261	3086.42
F3	3	52804.1	7239.71	45035.8	307309	2269.02
F4	3	60311.9	8939.11	49341	312905	3188.36
F5	3	66668.8	9653.6	52796.5	328882	2862.49
F6	3	64688	9306.79	54040.6	333031	2099.21
F7	3	55953	7542.58	54702.2	343055	1675.53
F8	3	61088.8	8798.94	54378.2	339859	2173.37
F9	3	55913.1	7384.8	51079.8	334728	2184.38
F10	3	64292	8334.19	49001.8	334552	2414.9
F11	3	62835.5	8172.67	46151.5	336803	2228.21
F12	3	78775	9836.85	41776.1	321951	2518.18
G1	3	84452.3	11247.8	41234.8	321429	3413.58
G2	3	76083.9	9872.33	44150.2	318581	2119.12
G3	3	51281.9	6693.11	43512.3	310213	2121.97
G4	3	53454.1	7177.56	46804.4	318325	2353.67
G5	3	57946.5	8152.25	52470.6	343929	2157.6
G6	3	60470.8	8047.11	51753.5	332750	1833.16
G7	3	58624.9	7814.44	48089.9	307656	1566.26
G8	3	55906.2	7754.95	53287.7	352130	8880.88
G9	3	58253	7955.6	49954	337684	2078.15
G10	3	58900.4	7814.94	45780	323823	1851.83
G11	3	92083.1	13297.3	47081.5	334684	3435.98
G12	3	79425.5	10511.5	42350.2	332327	1762.36
H1	3	85857.9	9761.71	37445.7	310197	5702.38
H2	3	90441	12781.7	42452.9	317647	3304.96
H3	3	59077.8	7914.46	44205.9	328298	2475.63
H4	3	58634.2	7588.71	44970.1	317628	2296.17
H5	3	64401.9	8822.12	50969.7	348103	2274.99
H6	3	61822.3	8461.74	48326.6	324062	1954.47
H7	3	60137.8	6705.93	4100.53	5458.3	1635.03
H8	3	73732.1	10452.3	7037.5	9816.21	4036.89
H9	3	52098.4	5763.7	3236.19	4321.33	1313.53
H10	3	56795.4	6181.36	3507.03	4886.99	1985.92
H11	3	66179.3	7309.25	4091.43	5766.87	2687.74
H12	3	75332.8	7773.88	4170.83	5937.94	1945.22
A1	4	117875	14825.7	38755.5	299482	4656.49
A2	4	110026	15867.9	47309	343617	6619.88
A3	4	74559	10239.5	46432.8	334198	3220.69
A4	4	63384	8350.61	46737.5	331112	2131.92
A5	4	57886.6	7991.29	48424.8	335348	2056.46
A6	4	68391.3	10163.5	52170.5	348977	2785.24
A7	4	57923.2	7644.15	49599	338530	2037.95
A8	4	65346.8	8021.83	49999.7	346672	2401.63
A9	4	68395.5	9352.1	46848.4	327755	3136.16
A10	4	67796.6	8588.97	41482.8	302323	2531.41
A11	4	76287.4	9434.4	39939.6	308096	2259.66
A12	4	75763.1	9476.61	32078.1	264110	2913.39
B1	4	103316	13119.3	39499.5	297703	3276.91
B2	4	73517.2	10060.1	45534.3	334182	2828.63
B3	4	62870.5	8155.44	43791.8	309642	1749.6
B4	4	57379.7	7414	46420.8	317404	1646.27
B5	4	59263.8	8074.91	46501.9	303350	2128.84
B6	4	56594.3	7422.03	48598.2	317404	1672.39
B7	4	57207.5	7457.95	51518.8	335267	1692.79
B8	4	60993	12791.7	61027	349708	2137.58
B9	4	58481.5	7750.69	50103.8	341679	1877.29
B10	4	55796.2	7117.97	45475.7	326617	2034.63
B11	4	59854.2	7858.33	40439.4	306417	1592.56
B12	4	61081.4	7263.78	32906.7	272594	2046.58
C1	4	113680	14334.7	44630	327928	2748.58
C2	4	69131	9268.56	43981	315898	2264.05
C3	4	57126.8	7546.86	45473.5	311256	2371.73
C4	4	58994.1	7923.73	48308.1	315773	2036.62
C5	4	55021.3	7601.38	51103.7	325373	2355.13
C6	4	53416.7	7422.39	49015.7	307706	1784.67
C7	4	178359	20420.8	59626.6	339601	3380.44
C8	4	58678.5	7834.46	51364.2	326663	2177.46
C9	4	58273.7	7738.26	52392.7	347372	2050.12
C10	4	55124.5	7546.47	47211.5	328360	1659.23
C11	4	58058.7	7171.92	45456.9	336425	2000.79
C12	4	62804	7517.21	38132.5	301196	1872.7
D1	4	61748.8	7976.25	42331.7	327696	2242.53
D2	4	66894.5	9320.5	44746.1	313878	2469.21
D3	4	58068	7462.82	46742.4	314428	2379.13
D4	4	65507.5	8918	48802	309546	2837.15
D5	4	58729.2	8052.63	52439	327814	1903.06
D6	4	54789.5	7449.21	53300.3	328345	1361.91
D7	4	56389.5	7635.48	54989.9	339685	1470.52
D8	4	54878.4	7343.71	54544.7	343140	1589.27
D9	4	64960.8	8551.66	52444.9	336073	2562.32
D10	4	93248.8	16229.5	56783.4	340881	5068.38
D11	4	61137.9	7644.62	43796.6	317478	1548.44
D12	4	66724.8	8355.51	41655	322253	2212.87
E1	4	86517.5	11321.2	42981.3	321179	2761.86
E2	4	65174.6	8818.55	42808.2	304191	2460.71
E3	4	62978.2	9208.94	47459.5	306740	2467.51
E4	4	62695.9	8407.7	49559.6	314458	2063.04
E5	4	64254	9514.84	55671	334762	2012.59
E6	4	53418.8	7696.54	54909.3	338003	2091.96
E7	4	58318	7926.63	57962.6	354280	1519.92
E8	4	55097.1	7782.3	54564.8	340442	1344.26
E9	4	55408.1	7563.97	52246.4	337062	1673.81
E10	4	58658.1	7694.05	49680.2	333137	2058.46
E11	4	70475.3	9360.16	48359.5	343480	2338.62
E12	4	82373.6	10810.3	42762.4	319282	3328.12
F1	4	68888.4	9185.98	40628.2	313057	2385.91
F2	4	60513.4	7704.54	42316.2	307335	2062.17
F3	4	53074.8	7250.74	45414.5	309046	2202.51
F4	4	61021.9	9067.9	49835.3	316202	3410.26
F5	4	67533.8	9714.54	53217.9	330712	2781.81
F6	4	65052.7	9410.92	54491	334684	2325.71
F7	4	56521.7	7388.32	55038.6	344868	1889.96
F8	4	61582.3	8648.02	54542.9	341940	2741.42
F9	4	56807.7	7518.23	51361.7	336150	2266.49
F10	4	65390.1	8432.64	49492	335673	2215.64
F11	4	63992	8254.03	46469.9	339089	2688
F12	4	78931.7	9821.76	42004.1	324444	2426.93
G1	4	85751.5	11137.1	41707.2	325168	3279.03
G2	4	76159.3	9795.03	44399.5	320045	2316.34
G3	4	51669.1	6563.88	43620	311535	2105.86
G4	4	53964.9	7327.35	47129.5	321128	1726.17
G5	4	58774.3	8298.43	52797.4	346176	2167.4
G6	4	61350	8392.83	52064.7	334679	2316.2
G7	4	59325.2	7979.96	48123.5	309141	1557.47
G8	4	56610.9	7761.31	53275.2	352789	9160.56
G9	4	59269.2	8026.97	50345.8	339675	2041.92
G10	4	59581.7	7748.3	45946.6	326753	2067.97
G11	4	93376	13164	47235.9	336024	4018.85
G12	4	80777.3	10029.5	42521.7	333389	2381.38
H1	4	87911.5	10279.6	37946.9	313486	4333.7
H2	4	91681.8	12959.9	42834.9	319960	3356.44
H3	4	59641.1	7839.77	44594.5	330649	2333.55
H4	4	58524.5	7613.82	45328.1	319542	2452.21
H5	4	64934.3	8837.76	51326.5	350885	2643.94
H6	4	62588.4	8485.22	48818.6	326057	2254.94
H7	4	60307.5	6824.65	4204.11	5348.44	1733.83
H8	4	74479.5	10528.4	7200.4	9735.03	3634.37
H9	4	52390.8	5599.86	3173.94	4297.76	1358.3
H10	4	56559.6	6430.91	3512.36	4725.37	1430.99
H11	4	65665	7034.79	4108.96	5852.06	2567.57
H12	4	75310.9	7553.19	4146.2	5977.24	1641.47
A1	5	118788	14954	38963	300370	4693.9
A2	5	110375	16127.4	47450.1	344944	6350.09
A3	5	75228.6	10224.8	46726.8	335932	2990.64
A4	5	63280.2	8425.26	46825.6	333241	2120.58
A5	5	57862.2	7804.09	48664.3	336361	1888.79
A6	5	68997.1	9927.51	52558.2	350185	2963.43
A7	5	58462.1	7778.88	49905.3	340375	1902.6
A8	5	65217.6	8326.61	50215.9	347971	2058.54
A9	5	68739.7	9429.29	47078.1	329156	3042.46
A10	5	67874.8	8769.2	41615.4	303991	2229.33
A11	5	76207.7	9219.62	39903.2	308264	2435.93
A12	5	75793.4	9488.41	32221.2	264837	2933.69
B1	5	104354	13362.8	39622.2	299263	3520.34
B2	5	74003.9	9983.11	45824.7	335466	3154.72
B3	5	62899	8229.88	43947	309964	1528.13
B4	5	57431.2	7505.78	46682	318671	1918.73
B5	5	59813	8311.33	46639.8	304210	1867.71
B6	5	56923.7	7636.29	48748.5	317987	1973.8
B7	5	57120.1	7449.47	51586.5	336526	1665.95
B8	5	61341.6	12639.5	61044.4	349836	1818.79
B9	5	58656.6	7779.84	50251.6	343579	1837.42
B10	5	55709.7	7162.57	45510	327772	2146.98
B11	5	60084.1	7863.86	40345.9	307227	1952.97
B12	5	61285.8	7169.89	32968.6	272780	1937.29
C1	5	115221	14280.2	44716	329905	3477.64
C2	5	70279.3	9439.39	44302.4	317278	2776.79
C3	5	57481.6	7576.5	45628.8	311229	1603.77
C4	5	59419	8113.6	48419.8	316242	1875.2
C5	5	55597	7778.87	51343.3	326791	2311.56
C6	5	53792.6	7150.57	49125	308083	1868.51
C7	5	178409	20320.2	59830.8	340259	3115.64
C8	5	58565.8	7817.41	51569.1	327523	1871.09
C9	5	58453.8	7746.2	52517.8	348300	1412.04
C10	5	55397.9	7405.25	47353.8	328238	1738.63
C11	5	58137.8	7127.63	45324.4	338054	1994.23
C12	5	62367.3	7531.39	38190.5	302010	1970.4
D1	5	61823.7	7874.59	42406.7	329435	2392.84
D2	5	66861.8	9359.16	44913	314882	2216.48
D3	5	57599.2	7711.19	46752.2	314507	2100.38
D4	5	65771.2	9064.92	49266.4	311074	2692.6
D5	5	58944.8	8063.22	52825.8	329379	1405.76
D6	5	54891.1	7583.94	53183.2	328128	1451.62
D7	5	56966.1	7652.55	55178	340551	1409.42
D8	5	55119.9	7758.58	54119.2	341684	1860.08
D9	5	65453.2	8598.83	52535	337063	2318.2
D10	5	94415	16481.9	56883.7	342619	5212.17
D11	5	61355.4	8074.21	43892.2	317900	1652.98
D12	5	66769.1	8248.26	41262.5	319188	2181.9
E1	5	87412	11213.6	43320.6	322483	2725.74
E2	5	65768.9	8660.73	42747.6	304066	2873.21
E3	5	63179.5	9345.49	47625.3	308017	2334.86
E4	5	62875.5	8656.38	49876.9	315507	1893.27
E5	5	64817.2	9595.24	55853.2	336021	1310.55
E6	5	53565.2	7674.85	54838.1	338199	1919.78
E7	5	58232.4	7696.52	58029.4	354535	1493.88
E8	5	55511.5	7587.71	54642.5	341626	1739.57
E9	5	55481.8	7350.25	52333.4	338376	1529.79
E10	5	58650.9	8085.94	49739.2	333903	2243.89
E11	5	71177.4	9958.5	48621.1	344777	2645.36
E12	5	82218.4	10923.9	42884.1	318946	3349.66
F1	5	69692.6	9137.08	40670.5	314743	2258.51
F2	5	60627.3	8091.71	42531.9	308844	2720.97
F3	5	53184.9	7329.06	45211	309885	2233.04
F4	5	61133.8	9206.69	50187.5	317690	3796.9
F5	5	67598.2	9685.16	53284.7	331703	3010.22
F6	5	65953.3	9541.53	54619.8	336578	2335.35
F7	5	56776.4	7793.71	55210.6	346238	1813.94
F8	5	61609	8651.23	54767	343448	2333.03
F9	5	56744.1	7351.15	51496.3	337242	2034.05
F10	5	65574.1	8447.69	49342.3	336397	2170.35
F11	5	63980.9	7978.18	46370.3	338914	1942.82
F12	5	80038.8	10116.6	42097	325343	2874.51
G1	5	86548.8	11519.8	42071.3	326760	3414.93
G2	5	76596.7	9661.02	44636.9	321620	2214.74
G3	5	52100.2	6633.56	43757.6	312204	2274.46
G4	5	54521	7295.41	47596.9	322945	1946.11
G5	5	59105.5	8566.96	52957.5	348989	1893.21
G6	5	61605	8429.27	52316	335453	2465.77
G7	5	60091.7	8105.8	48411.3	310207	1918.77
G8	5	57242.3	8100.33	53557	353823	8955.25
G9	5	59360.6	7946.82	50403.2	340876	2167.67
G10	5	60561.1	7905.3	46361.9	327721	1799.7
G11	5	94309.4	13334.3	47177.4	336543	3721.16
G12	5	81205	10292.3	42318.6	332741	2183.49
H1	5	88522.1	9450.36	37402.8	315064	5425.55
H2	5	92357.2	13396.3	43005.1	322018	3692.77
H3	5	59694.3	7937.8	44018	328196	1941.75
H4	5	58633.2	7717.42	45378	320532	2566.77
H5	5	65240.2	9049.42	51697.2	352165	2358.43
H6	5	63488.2	8602.64	49248.1	328106	2134.94
H7	5	60121.9	6751.44	4138.54	5394.85	1823.92
H8	5	74876.2	10728	7188	9865.62	4013.64
H9	5	52189.4	5543.57	3080.56	4427.85	1386.87
H10	5	56670.5	6126.16	3535.8	4916.96	2066.74
H11	5	66013.6	7079.68	3952.32	5371.68	2401
H12	5	75589.8	7498.02	4027.69	6516.48	1811.44
A1	6	120065	15092.2	39208.8	301790	4676.53
A2	6	111271	16145.1	47751.6	346271	6376.95
A3	6	75142.9	10192.2	46930.6	337268	3493.56
A4	6	63807.1	8408.96	47288	335843	1884.86
A5	6	58556.8	8105.18	48991.9	338396	1856.72
A6	6	69563.5	10103.8	52951.8	352057	2945.05
A7	6	58747.7	7749.77	50136.5	342041	1828.2
A8	6	65711.4	8277.43	50590.7	350067	2335.18
A9	6	68979.2	9538.53	47132.5	330256	3302.98
A10	6	68506.4	8906.17	41691.3	305801	2460.71
A11	6	76226.7	9684.62	40163.1	309508	2710.95
A12	6	76360	9817.93	32140.2	266000	2947.23
B1	6	104813	13845.8	39782.4	300244	3495.12
B2	6	74845.1	10333	45947.3	336995	3366.04
B3	6	63341	8347.51	44028.7	311182	2254.37
B4	6	58056.4	7532.92	46891.1	319358	1646.27
B5	6	60301.7	8175.91	46831.4	305989	2210.69
B6	6	57308.8	7598.9	48992.2	318587	1838.51
B7	6	57717.8	7619.79	51721.1	337843	1513.83
B8	6	61915.7	12668.4	61222.7	351285	1949.75
B9	6	59634.9	7769.6	50668.5	345601	1812.19
B10	6	56117.6	7077.66	45680.8	328210	2017.08
B11	6	60654.4	7902.5	40617.1	307846	2259.59
B12	6	61269.6	7258.26	33165.4	273392	1894.73
C1	6	116167	14345.6	44894.3	331307	3402.71
C2	6	70752.2	9267.38	44384.6	318470	2139.85
C3	6	57778.5	7504.25	45826.3	312111	2155.1
C4	6	60021.7	8056.55	48417.9	318134	1929.63
C5	6	55763.7	8132.28	51528	327653	2360.06
C6	6	54082.5	7219.91	49034.9	308864	1657.09
C7	6	179300	20671.8	60113.8	341887	3156.2
C8	6	58894.9	7590.93	51763.6	328289	1893.88
C9	6	59008.7	7924.54	52757.7	349210	1608.23
C10	6	56257.3	7206.08	47600.5	329430	1620.43
C11	6	58594.7	7374.55	45538.6	338847	1654.21
C12	6	63010.4	7732.47	38306.5	302823	2028.76
D1	6	62508.5	7830.11	42452.6	331503	2055.86
D2	6	67392.3	9163.39	45000.1	316440	2170.53
D3	6	58132.8	7913.33	46851	315153	1985.85
D4	6	66784.3	9188.85	49462	311845	2502.63
D5	6	59616.2	8283.94	52882.9	329703	1493.74
D6	6	55206.7	7452.31	53175.8	328539	1476.09
D7	6	57068.9	7540.06	55281.1	341377	1578.87
D8	6	55695.5	7258.83	54180.5	341999	1634.7
D9	6	65789	9023.39	52567.3	337967	2724.12
D10	6	95875.6	16966.3	57370.6	343957	5304.16
D11	6	61910.8	7704.1	43952.7	318585	1867.5
D12	6	67331.8	8410.11	41238.9	320171	2059.9
E1	6	88020.1	11656.7	43708.9	324202	3022.58
E2	6	66279.6	8749.88	43021	304446	2629.52
E3	6	63935.8	9499.94	47857	309672	2278.65
E4	6	63950.7	8628.87	50293.8	317847	2477.89
E5	6	65530.8	9879.76	56188.7	337283	1830.9
E6	6	53881.3	7683.89	54757.4	338406	2078.56
E7	6	58834.4	7983.23	58134.1	355919	1377.19
E8	6	55921.5	7536.3	55053.6	343459	1724.04
E9	6	55754.1	7304.07	52619.9	339170	1556.46
E10	6	59413.2	8208.4	49940.7	334980	2063.67
E11	6	71659.2	9566.9	48731.6	345118	2429.58
E12	6	82413.2	10673.5	42857.1	319781	3405.83
F1	6	69717.8	8962.41	41239.2	316658	2246.93
F2	6	61390.9	8086.53	42824.6	310247	2948.44
F3	6	53718	7544.17	45599.5	311562	2350.79
F4	6	61502.3	8793.66	50585.6	319428	3780.09
F5	6	68757.3	9471.87	53544.9	333439	2623.86
F6	6	66188.3	9620.09	54980.8	337514	2408.6
F7	6	57545.5	7535.99	55533.5	347058	1910.43
F8	6	62498.4	8751.84	54910	344186	2409.06
F9	6	57380.4	7454.41	51659.9	338210	1640.89
F10	6	65751.5	8509.08	49700	336878	2125.06
F11	6	64397.9	8175.22	46622.4	340086	2425.78
F12	6	80334.6	9735.87	42346.6	325282	2752.84
G1	6	87109.1	11907	42144.3	328702	3492.97
G2	6	76973.5	9904.55	44976.3	323790	2579.28
G3	6	52173.5	6794.25	43885.5	313402	2146.67
G4	6	55559.8	7299.81	47956.2	324745	2258.79
G5	6	59977.6	8394.79	53454.1	351321	2183.72
G6	6	62426.8	8496.25	52477	336437	2503.16
G7	6	60311.7	8309.07	48672.2	311852	1479.35
G8	6	57817.5	8079.14	53185.8	351521	8823.26
G9	6	60311.4	8087.35	50790.7	343078	2058.97
G10	6	60775.9	7891.75	46592.3	328994	1137.17
G11	6	95100.2	13816.3	47433.9	336956	3582.32
G12	6	81387	10364.8	42854.6	333313	2403.37
H1	6	89870	10131.1	37555.1	316716	4957.62
H2	6	93094.2	13564.2	43349.9	323960	3520.03
H3	6	60144.8	8198.04	44456.8	330223	2147.34
H4	6	59656.9	7679.75	45658.7	322244	2263.58
H5	6	66145.8	9003.54	52047.1	354012	2061.87
H6	6	63594.5	8618.61	49153.8	329877	1804.7
H7	6	60292.5	6757.38	4149.95	5595.64	1970.18
H8	6	76154.9	10883.9	7388.09	10210.6	3755.12
H9	6	52871.7	5659.16	3258.83	4261	1510.7
H10	6	56848.7	6268.76	3544.32	4774.61	1391.12
H11	6	66124.5	7309.25	4232.88	5627.25	2071.42
H12	6	75685.6	7346.3	4273.94	6387.56	1413.27
A1	7	121551	15402.4	39206.2	302741	4517.57
A2	7	112208	16357.4	47944.2	347374	6684.12
A3	7	75760.8	10222.8	47110.9	337941	3138.03
A4	7	64193.5	8406.38	47638.8	337583	1749.54
A5	7	58616.4	8083.11	49198.9	339237	1935.45
A6	7	69809.8	10226	53030.8	353853	3027.78
A7	7	59007.3	7824.24	50457	343796	1757.34
A8	7	66240.9	8359.86	50853.5	351592	2431.97
A9	7	69111.4	9378.31	47613.8	331402	3122.45
A10	7	69432.5	9026.03	42072.7	307396	2347.78
A11	7	76059.6	9457.33	40393	310961	2596.27
A12	7	75878.8	9669.81	31918.2	262672	2894.22
B1	7	106103	13671.5	40085.2	300404	3671.7
B2	7	75187.2	10459.5	45950.5	337835	2987.39
B3	7	63780.9	8243.66	44185.8	312024	1804.05
B4	7	58204.7	7537.71	47035.8	321781	1450.13
B5	7	60863.1	8235.77	46966.9	305696	2100.78
B6	7	57821.3	7577.33	49025.6	319146	1716.74
B7	7	58202.4	7676.05	52103.7	339554	1892.08
B8	7	61765.7	12458.3	61213.1	352598	2026.43
B9	7	59493.4	7686.1	50845	347236	1451.71
B10	7	56456.9	7432.74	45883.2	329651	1879.27
B11	7	61126.6	7875.82	40781	308924	1831.26
B12	7	61867.6	7436.1	33255.7	273961	1494.38
C1	7	116897	14551.3	45299.6	331367	3769.78
C2	7	71263.8	9553.27	44920	320428	2495.35
C3	7	58026.8	7513.51	45875.3	313214	2014.71
C4	7	60710.8	7991.47	48907.5	318746	1877.97
C5	7	56179	7924.95	51780.9	328351	2316.49
C6	7	54684.5	7517.39	49119.8	309093	1649.8
C7	7	180333	20696.8	60384.2	342559	3405.7
C8	7	59421.6	7957.85	51955.6	328970	2038.2
C9	7	59384.4	8002.23	52885.6	350656	1902.52
C10	7	56557.8	7334.64	47572.8	329411	1842.39
C11	7	59078.3	7312.54	45746.2	339193	1992.05
C12	7	63129.8	7669.31	37861.4	301398	1753.44
D1	7	63222.7	8166.85	43043.8	332740	2304.35
D2	7	68671.9	9475.12	45736.3	317784	2644.54
D3	7	58463.8	7662.81	46905.8	315485	2368.32
D4	7	67072.5	9152.87	49612.6	313165	2619.3
D5	7	59805.2	8402.25	53286.6	331131	1910.46
D6	7	55564.4	7593.24	53193.9	328183	1204.52
D7	7	57736.7	7714.61	55460.9	342395	1569.91
D8	7	56149.1	7432.92	54821	343873	1848.5
D9	7	66080.3	8770.54	52976.7	339379	2327.66
D10	7	96219.9	16887.5	57784.3	345436	5216.64
D11	7	62373.4	7960.76	44334.2	319301	1893.63
D12	7	68308.8	8221.94	41558	321165	2023.3
E1	7	88676.3	11545.7	43787.9	325040	2959.37
E2	7	66859.8	8936.61	43054.2	305202	2416.73
E3	7	64158	9604.03	48141	310661	2079.68
E4	7	64307.8	8802.72	50508	318703	2104.63
E5	7	66106	10081.8	56665.6	338788	1593.3
E6	7	54282.8	7795.94	54900.8	339060	2105.35
E7	7	59178.7	8007.35	58364.9	356427	1500.63
E8	7	56235.5	7689.54	55001.2	344346	1796.48
E9	7	56110.9	7213.86	52517.4	340178	1531.92
E10	7	59767.2	8262.71	50004	335464	2299.1
E11	7	72281.4	9733.17	48759.5	346295	2452.85
E12	7	82775.1	10889.9	42765.2	319970	3715.7
F1	7	70471.7	9503.17	41171.1	318600	2509.46
F2	7	61618.7	8165.51	43130.8	311677	2903.69
F3	7	54237.7	7449.3	45919.5	312435	2278.83
F4	7	62070.5	9041.25	50515.2	320523	4044.57
F5	7	68273.9	9736.3	53678.3	334366	2424.99
F6	7	66834.7	9746.14	55256.3	338781	2528.11
F7	7	57041.9	7492.72	55563.3	348067	2044.94
F8	7	62487.9	8893.12	55024.8	345196	2161.42
F9	7	57351.8	7408	51656.4	338771	2330.09
F10	7	65850.5	8739.55	49721.7	336588	2271.11
F11	7	65147.2	8860.4	46719.5	340280	2568.48
F12	7	80452.7	10107.3	42397.4	326473	2695.26
G1	7	88657.7	11684.2	42641.1	329982	3593.88
G2	7	77220.6	9743.49	45096.2	324443	2371.32
G3	7	52470.6	6752.67	44144.6	313813	2039.28
G4	7	56104.8	7668.77	48164.7	326527	2048.54
G5	7	60576.3	8735.87	53651.6	353164	2121.7
G6	7	62801.1	8426.32	52504.5	336640	2207.06
G7	7	61410.7	8319.72	48941.8	313165	1801.59
G8	7	58509.9	8244.41	53576.7	353363	9129.14
G9	7	60730.6	8191.66	50979.1	343984	2360.57
G10	7	61397.2	8112	46573.9	330448	1795.36
G11	7	95598.5	13515.2	47254.6	335939	3367.18
G12	7	82224.6	10326.7	42711.5	334079	2330.64
H1	7	89797.1	9858.51	37683.8	317610	4967.45
H2	7	93314.1	13644.4	43495.2	325547	3238.61
H3	7	60376	7982.14	44733.3	331955	2228.07
H4	7	59975.6	8061.7	45891.5	323473	2536.16
H5	7	66830.6	9137	52098.7	355699	2477.06
H6	7	64378.9	8721.94	49462.8	331481	2037.26
H7	7	60494.8	6533.78	4047.31	5786.96	1743.52
H8	7	76276.3	11099.3	7450.95	10244.2	4264.1
H9	7	52789.9	5625.99	3158.85	4150.7	1458.31
H10	7	57199.7	6142.26	3456.96	4732.87	1524.73
H11	7	66313.4	7428.53	4182.61	5875.72	2053.58
H12	7	75620.1	7461.82	4226.23	6816.76	2182.86
A1	8	122302	15512.4	39592.1	303632	4627.11
A2	8	112812	16322	48197.6	347973	6493.75
A3	8	75707.9	10436.6	46985.5	338323	3109.15
A4	8	64364.4	8649.21	47853.4	338435	2248.04
A5	8	59112.8	7956.41	49434	340145	1958.05
A6	8	70263.9	10220.5	53211.7	353399	3055.35
A7	8	59506.9	7805.96	50633.3	344710	1911.11
A8	8	66174.3	8401.42	51067.5	352406	2091.77
A9	8	69394.6	9550.91	47653.8	331753	3036.37
A10	8	69080.2	9062.98	42272	308474	2532.33
A11	8	76619	9528.23	40464.7	310775	2426.37
A12	8	76003.7	9476.61	31969.7	263223	3332.97
B1	8	106611	13815.2	40124	300774	3514.04
B2	8	75525.7	10297.8	46266.7	338791	2904.79
B3	8	63464.2	8306.16	44336.3	311761	1810.51
B4	8	58577.1	7609.53	47085.4	321043	1833.38
B5	8	60864.8	8526.8	47159.3	306031	2277.73
B6	8	57768.7	7695.96	49163.8	319332	1722.75
B7	8	58155.8	7672.2	52465.1	339653	1796.91
B8	8	62023.5	12666	61355.7	353945	2084.16
B9	8	59937.6	7853.88	51165.1	347662	1867.52
B10	8	56329.1	7300.66	45834.8	329156	1973.19
B11	8	61168.5	8051.55	40798.6	308648	2254.87
B12	8	62404.7	7275.93	33280.7	273872	1986.76
C1	8	117961	14667.1	45530.6	332867	3288.39
C2	8	71387.6	9628.01	45102.7	321758	2439.52
C3	8	58064.9	7721.91	45886.6	313599	2011.92
C4	8	60635.4	8010.19	48953.1	318919	2074.44
C5	8	56047.2	7950.08	51836.7	328378	2153.73
C6	8	54486.4	7376.62	49305.2	308878	1670.21
C7	8	180820	20611.6	60445	342618	3047.52
C8	8	59880.7	7952.17	51935	329318	1996
C9	8	59503.3	7920.13	53143.9	351052	2062.72
C10	8	56696.9	7591.74	47616.2	329351	1997.57
C11	8	59246.9	7356.83	45943.8	338745	1900.21
C12	8	63608.7	7911.64	37986.2	301011	1998.31
D1	8	62994	8132.54	43031.7	333637	2121.31
D2	8	68674.4	9438.96	45547.4	319464	2665.1
D3	8	58348.9	7635.93	47135.1	315431	2275.41
D4	8	67206.7	9468.69	49885.5	313758	2810.3
D5	8	60294.3	8242.45	53268.8	331223	2179.02
D6	8	55489	7686.93	53258.2	327831	1491.58
D7	8	58051.4	7791.42	55662.9	341446	1492.51
D8	8	56429.2	7304.74	54717.6	344174	2013.31
D9	8	66023.9	8930.93	53086.4	339104	2597.33
D10	8	97374	17265.6	58174.6	347012	5001.4
D11	8	62444	8107.26	44234.2	318828	1801.07
D12	8	68156.3	8597.3	41649.3	321509	2087.12
E1	8	88833.6	11661.4	43846.9	326837	2765.24
E2	8	67212.9	9035.4	43093.5	305231	2604.55
E3	8	64578.3	9752.88	48459.1	312139	2262.91
E4	8	64755.6	8881.94	50612.2	318967	2259.78
E5	8	66396.8	10028.2	56588.4	339474	1872.82
E6	8	54430	7769.74	54981.5	338366	2010.65
E7	8	59181.2	8100.14	58363.9	356266	1223.85
E8	8	56172.7	7680.47	55343.1	343963	1625.73
E9	8	56232.8	7358.84	52833.7	339426	1686.61
E10	8	59738.5	8246.74	49958.9	335053	2635.58
E11	8	72209.1	9870.99	49002.9	345406	2299.48
E12	8	82505.1	11124.7	42970.5	319658	3112.8
F1	8	70512.3	9498.98	41734.6	320446	2496.59
F2	8	61622.4	7859.92	43223.8	312797	2487.28
F3	8	54320.1	7540.86	46034.8	313506	2381.32
F4	8	62041.5	9306.62	50840.6	321479	3604.14
F5	8	69144.7	10059.5	53882.9	334483	2680.67
F6	8	66760.6	9732.44	55677.5	339819	2402.82
F7	8	57218.1	7523.76	55405.7	345272	1772.02
F8	8	62860.8	8928.44	55054	345020	2653.44
F9	8	57656.7	7824.52	51883.8	338575	2245.67
F10	8	66218.4	8532.24	49614.3	336692	2049.21
F11	8	65006.2	8601.07	46740.4	339961	1929.41
F12	8	80683	10089.9	42281.8	325579	2856.04
G1	8	89855.3	11885.5	42647.8	331578	3393.4
G2	8	76794.4	9979.28	45275.4	325940	2760.96
G3	8	52600.4	6797.62	44291.8	314611	2248.68
G4	8	56210.2	7598.28	48349.7	327707	2142.34
G5	8	61036.5	8803	53955.9	354276	2363.24
G6	8	63644.6	8588.83	52625.2	336223	2299.02
G7	8	61897.1	8439.75	49185.4	314385	1843.58
G8	8	58958.4	8177.66	53879.3	354330	9312.45
G9	8	61414	8375.01	51089.8	345220	2066.43
G10	8	62238.7	8311.92	46819.4	330005	2029.96
G11	8	96794.2	13911.4	47453.9	334751	3523.53
G12	8	82154	10736.2	42738.1	333815	2459.18
H1	8	91958.5	10137.6	37758.6	319196	4801.64
H2	8	93973.8	13781.8	43808.5	326994	3308.39
H3	8	61237.8	8182.86	44872.1	333627	2200.08
H4	8	61019.3	8103.55	46266.1	324486	2335.68
H5	8	67168.4	9476.92	52451.5	356888	2222.72
H6	8	65183.9	8823.39	49673	332612	1986.1
H7	8	61069.2	6919.63	4187.01	5934.71	2107.72
H8	8	76593.5	11203.2	7617.39	10172.7	4291.83
H9	8	52846	5729.53	3134.33	4212.92	1510.7
H10	8	57148.5	6081.31	3582.67	4942.65	1534.43
H11	8	66384.1	7005.29	4162.74	5750.3	2152.33
H12	8	75648.6	7637.67	4084.64	6029.12	1992.43
A1	9	123575	15496.9	39530	304359	4883.58
A2	9	113442	16447	48142.6	348505	6302.2
A3	9	75844.2	10196.2	47346.1	339310	3636.97
A4	9	64521	8611.46	47983.4	339705	2048.11
A5	9	59284.9	8138.63	49365.2	341247	1789.65
A6	9	70553.5	10387.9	53146.4	354169	3056.06
A7	9	59473.1	7996.2	50835.3	345982	2011.73
A8	9	66534.9	8514.32	51276.4	353057	2030.37
A9	9	69929.4	9357.92	47647	332392	3131.59
A10	9	69659.4	9195.45	42483.3	310113	2639.76
A11	9	77469.4	9476.1	40469.9	311569	2616.45
A12	9	76622.9	9590.38	32036	264231	3055.51
B1	9	107017	14048.1	40229.1	301479	3723.42
B2	9	75918.5	10479.4	46420.5	339183	2986.31
B3	9	64168.9	8440.33	44375.3	312347	1901.86
B4	9	58932.9	7637.46	47319.3	322156	1834.2
B5	9	61243.1	8434.78	47179	307103	1951.9
B6	9	58079.2	7779.36	49283	319782	1496.51
B7	9	58463	7665.26	52364.8	340742	1550.44
B8	9	62534.7	12344.2	61507.9	354913	2232.35
B9	9	60300	7929.49	51069.9	348424	1799.98
B10	9	56483.2	7333.25	45945.7	329686	2272.5
B11	9	61465.9	7862.94	40656	309310	2182.23
B12	9	62514.3	7451.56	33416.6	273803	2018.97
C1	9	119680	14825.1	45395.9	333252	3624.98
C2	9	72159.4	9709.87	45165.2	323156	2588.79
C3	9	58599.6	7690.42	46275.1	314136	2135.58
C4	9	60902.3	7968.3	48938.2	319416	2113.18
C5	9	56387	7976.78	51759.3	328400	2159.49
C6	9	54775.5	7558.99	49291.2	308733	1880.9
C7	9	181452	20744.5	60521.4	342971	3571.01
C8	9	59874.9	7668.86	52038.7	329621	2052.55
C9	9	59551.9	7914.83	53123.7	351325	2043.82
C10	9	56987.1	7540.14	47506.2	329075	1892.01
C11	9	59787.5	7380.09	45631.4	339128	2022.66
C12	9	63193	7927.1	38025.3	301111	2068.09
D1	9	63965	8108.4	43060.7	335152	2703.16
D2	9	69251.3	9397.81	45814.8	320188	2719.51
D3	9	58499.3	7721.94	47107.7	316142	1820.54
D4	9	67619.7	9294.79	49698.3	314525	2990.98
D5	9	60522.3	8470.23	53414	331704	2048.45
D6	9	55772.7	7691.58	53302.8	327468	1564.16
D7	9	57487.8	7572.64	55620	341767	1570.72
D8	9	56579.8	7635.59	54954.6	344950	2032.91
D9	9	66596.4	9087.55	53342	339568	2300.22
D10	9	98978.4	17456	58555.8	347886	5307.73
D11	9	62937.6	7870.43	44177	319403	1532.11
D12	9	67966.7	8361.36	41586.2	321695	1886.29
E1	9	89594.3	11733.9	43991.6	327380	2539.51
E2	9	67553	8875.17	43246.8	305046	2535.6
E3	9	64779.6	9690.21	48770.3	313338	2271.91
E4	9	65251.3	8811.52	50736.8	319423	1779.72
E5	9	66745.7	10126.1	56788.8	339633	1618.03
E6	9	54874.8	7765.22	54928.3	337897	1944.65
E7	9	59546	7870.96	58386.2	356794	1422.52
E8	9	56405	7630.06	54989.6	343808	1265.61
E9	9	56949.4	7307.29	52748.8	340430	1700.48
E10	9	60034.2	8390.5	49878.5	334865	2430.36
E11	9	72901.5	10009.9	49067.2	345416	2586.13
E12	9	82839.4	11248.9	42956.5	319675	3186.76
F1	9	71187.9	9367.63	41843.8	321763	2237.92
F2	9	61909.1	8226.37	43321.8	313531	2780.64
F3	9	54072	7390.84	46222	314447	2595.03
F4	9	62871.4	9163.39	50814.9	322309	3676.98
F5	9	69762.7	9864.71	54118.7	335303	2559.08
F6	9	67232.3	9672.15	55559.1	340441	2444.26
F7	9	57485.4	7799.36	55634.4	345826	2019.6
F8	9	63131.4	8869.58	55121.1	344388	2297.19
F9	9	58405.1	7633.09	51949.9	338816	2081.47
F10	9	66399	8723.34	49608.6	336323	2042.42
F11	9	65746.9	8364.63	46830.1	339938	1889.16
F12	9	81907.1	9994.7	42254.8	326151	2536.65
G1	9	90052.3	12126.8	43214.9	332736	3344.96
G2	9	77300.9	10036	45554.4	327698	2543.43
G3	9	52661.1	6853.81	44330.2	315615	2589.1
G4	9	57445.8	7804.24	48752.9	329418	2503.53
G5	9	61599.6	8896.12	54040.3	356194	2274.02
G6	9	64766.6	8983.8	52501.5	336652	2234.35
G7	9	63082.9	8470.72	49279.4	315167	1884.59
G8	9	60571.7	8235.93	53850.2	353926	9132.28
G9	9	63069.4	8563.85	51418.7	347102	1904.44
G10	9	63651.9	8524.26	46891.9	331165	1993.03
G11	9	98108.6	14009.1	47335.5	334900	3380.94
G12	9	83983	10406.4	42668.2	334189	2653.68
H1	9	93186	10429.6	38028.6	319924	5159.97
H2	9	95130	13948.4	43816.4	328535	4073.71
H3	9	62108.4	8377.75	45189.2	335378	2581.11
H4	9	61662.4	8035.54	46376.6	326006	2260.62
H5	9	68384.6	9343.46	52762.8	357571	2718.33
H6	9	66406.9	9119.29	50042.7	333697	2260.52
H7	9	60816.5	6672.29	4161.35	5649.62	2110.63
H8	9	76868.8	11121.5	7617.39	10305	4086.09
H9	9	53257	5555.63	3051.32	4344.9	1443.07
H10	9	57450.4	6413.66	3482.53	4691.12	1890.02
H11	9	66726.6	7514.46	3834.25	6005.87	2340.32
H12	9	75467.2	7561.81	4098.49	6895.36	1770.53
A1	10	124690	15582.9	39729.6	304346	4433.42
A2	10	114386	16402.2	48432.7	349250	6475.06
A3	10	76214.2	10486.9	47294.2	340696	3143.01
A4	10	64946.1	8595.16	48174.5	341182	1951.21
A5	10	59318.5	8182.76	49710.5	343244	1955.86
A6	10	71242.6	10395.5	53513.3	355931	3192.53
A7	10	59842.8	8026.67	50952.4	347269	1947.25
A8	10	66751.7	8464.45	51356.5	354542	2179.17
A9	10	69841.9	9558.19	47962.8	334152	3286.99
A10	10	69863.9	9107.13	42647.9	310847	2334
A11	10	77291	9808.69	40617.6	312580	2796.97
A12	10	76876.6	9931.71	32280.1	265701	2972.04
B1	10	107824	14159.9	40255.4	302288	3487.55
B2	10	76802.9	10580.6	46616.3	339968	2865.1
B3	10	64649.6	8484.45	44743.3	312763	1553.97
B4	10	59074.2	7578.41	47394.5	323168	1995.87
B5	10	61600.3	8514.08	47436	308705	2157.69
B6	10	58555.5	7908.06	49387	320369	1540.86
B7	10	58848.5	7602.84	52443.9	341546	1582.97
B8	10	62521.3	12551.8	61515.7	356384	2100.53
B9	10	60573.4	7923.19	51375.2	349683	2072.59
B10	10	56800.9	7362.41	46052.2	330233	2384.85
B11	10	61832.8	8046.95	40994.9	309842	2079.39
B12	10	62666.3	7555.4	33389.4	275333	1817.65
C1	10	120532	14906.9	45692.2	334090	3453.51
C2	10	72832.4	9722.92	45425.4	325090	2646.9
C3	10	58854.5	7764.52	46304.3	315407	2178.34
C4	10	61269.1	8213.43	49034	320511	2081.82
C5	10	56903.1	7945.37	51944.8	329471	2359.24
C6	10	54774.8	7466.77	49368.8	309292	1577.62
C7	10	181498	20895.7	60593.9	343781	3361.31
C8	10	59939.1	7952.98	52174.1	331055	2505.76
C9	10	60332.9	7767.39	53276.4	352239	2003.32
C10	10	57473.3	7409.77	47506.2	329872	2013.81
C11	10	59502.7	7372.34	45836.7	339903	1920.98
C12	10	63716.8	7927.1	38141.3	302097	1771.2
D1	10	63690.8	8121.11	43492.3	335851	2121.31
D2	10	69452.5	9700.8	46192.8	321869	2637.29
D3	10	59232.3	7706.89	47261.3	317166	2298.1
D4	10	68344.6	9531.66	50000.6	316147	2374.61
D5	10	60732.1	8470.23	53384	332574	1969.73
D6	10	56152.9	7618.79	53352.3	327605	1504.63
D7	10	58240.2	7813.14	55600.2	342215	1502.29
D8	10	57089.9	7710.08	55015	346236	2128.23
D9	10	66955.9	8940.37	53257.8	340552	2399.58
D10	10	99603.2	17788.1	58920.7	349845	5728.39
D11	10	63084.4	8022.44	44435.4	320107	1962.23
D12	10	68176.9	8682.13	41828.2	322079	1895.68
E1	10	90086.2	11758.4	44261.9	329185	3025.96
E2	10	67793	9114.91	43098.2	305353	2354.91
E3	10	65474.3	9860.33	48943	314592	2079.68
E4	10	65193.5	8812.62	50658.7	321319	2201.32
E5	10	67149.2	10189	57057.8	341339	1917.98
E6	10	55152.4	7795.04	54920.7	338452	1915.95
E7	10	59463.7	8014.78	58483.1	357719	1300.04
E8	10	56929.8	7680.47	55437.5	344564	1837.88
E9	10	56930.7	7507.05	52688.2	339979	1623.67
E10	10	60147.8	8278.69	49991.1	335476	2578.28
E11	10	72701.6	9858.96	49025.4	346422	2495.16
E12	10	83206.2	11202.3	42931.4	319759	3440.47
F1	10	71558.5	9512.96	41877.1	323313	2477.28
F2	10	61842.7	8104.65	43569.7	315025	2479.82
F3	10	54383.9	7610.36	46248.2	315718	2364.97
F4	10	62505.9	9104.54	50898.7	322813	3683.71
F5	10	69759.8	9955.04	54371.1	336578	2705.67
F6	10	67625.9	9737.92	55900.4	341971	2711.24
F7	10	57990.6	7719.41	54880.9	342088	2477.71
F8	10	63093.2	8895.26	55250	345414	2380.82
F9	10	58606.3	7708.5	51785.2	339133	2363.62
F10	10	66998.7	8792.83	49534.3	336474	2314.14
F11	10	66002	8461.24	46868.2	340891	2324.56
F12	10	81512	10153.7	42482.8	326954	2750.66
G1	10	90740.4	12435.7	43246.1	334276	3690.76
G2	10	77361.5	10101.7	45562.7	328810	2566.14
G3	10	52918.5	6986.42	44587.1	316643	2281.97
G4	10	59740.2	8037.73	48729.3	330799	2158.52
G5	10	63918.5	9310.83	54416.2	357232	1907.35
G6	10	66558.9	9084.27	52852	337587	2212.12
G7	10	65958.1	8932.45	49437.7	316560	1653.17
G8	10	63121.1	8753.99	53867.9	355666	9487.39
G9	10	65959	9044.75	51964.8	349225	2219.89
G10	10	65588.5	8566.05	47128.8	332094	1615.06
G11	10	100143	14538.6	47257.1	335260	3619.84
G12	10	86432.3	11212.8	42858	334500	2288.36
H1	10	94343.6	9847.22	37982.9	321333	5731.89
H2	10	96663.2	14197.8	43795	329070	3314.11
H3	10	64201.1	8567.97	45367.5	336682	2183.93
H4	10	63559	8469.8	46380.5	327462	2347.53
H5	10	70066.8	9748.02	52809.3	359594	2442.88
H6	10	67914.1	9116.47	50166.8	335718	2027.96
H7	10	61049.8	6957.23	4154.7	5635.42	1841.35
H8	10	77370.9	11419.5	7597.02	10288.3	4371.44
H9	10	53319.5	5688.31	3192.81	4160.13	1606.9
H10	10	57552.8	6153.76	3625.28	4982.25	1517.19
H11	10	66492.6	6984.77	4202.48	5643.82	2136.86
H12	10	75715.8	7235.96	4080.02	6107.73	2008.17
A1	11	125155	15800	39723	305279	4882.24
A2	11	114680	16622.7	48488.9	349432	6583.68
A3	11	76260.1	10327.3	47496	340402	3147
A4	11	65206.5	8514.5	48272.2	342498	1841.21
A5	11	59794.7	8347.18	49792.6	343772	1772.88
A6	11	71368.6	10550.5	53659.1	356337	3185.46
A7	11	60152.8	8025.99	51113	348074	1883.47
A8	11	67191.9	8405.58	51432.9	355279	1987.76
A9	11	70060.8	9702.38	48054.2	334424	3019.61
A10	11	69916.4	8941.32	42654.3	311940	2479.08
A11	11	79637.3	10104.8	40585.3	313766	2630.25
A12	11	77031.8	9822.23	32348.5	266143	3496.52
B1	11	108289	13828.5	40537	302952	3357.63
B2	11	76727.5	10611.4	46645.3	340118	3263.06
B3	11	64648.6	8330.97	44598.3	313268	2214.69
B4	11	59464.9	7651.83	47518.5	323358	1806.3
B5	11	61963.1	8573.19	47761.5	309292	2382.19
B6	11	58476.1	7734.07	49394.6	320734	1513.05
B7	11	58810.2	7608.23	52706.6	341874	1674.08
B8	11	62723.4	12382.2	61468.8	357235	1924.77
B9	11	60758.9	8014.56	51542.6	349736	1970.05
B10	11	56956.9	7389.86	46072.5	330212	1867.86
B11	11	62140.4	8005.55	40919.9	309442	2133.17
B12	11	62738.6	7638.24	33646	275105	1845.26
C1	11	121451	14992.7	46130.9	335100	3337.93
C2	11	72654.8	9700.38	45712.2	326524	2452.05
C3	11	59108.6	7661.71	46547	317009	1873.39
C4	11	61057.6	8316.84	49299.3	320139	1815.25
C5	11	57049.2	8113.43	52066.3	329627	2210.45
C6	11	55130.4	7391.88	49467	309094	1641.05
C7	11	181908	20826.7	60762.3	343595	3134.77
C8	11	60615.5	8073.12	52354.1	330910	2113.32
C9	11	60141	7790.35	53277.3	352278	1749.53
C10	11	57203.6	7597.17	47633.8	329442	1846.9
C11	11	60265.3	7587.15	45597.1	339103	1704.5
C12	11	64180.2	7652.56	38164	301563	1857.48
D1	11	64327.4	8470.55	43608.4	336898	2294.66
D2	11	70112.4	9896.57	46167	322657	2723.14
D3	11	58865.8	7790.75	47465.4	317183	2002.06
D4	11	67704.8	9721.55	50224.4	315758	2610.01
D5	11	60571.2	8437.56	53390.6	332331	1887.31
D6	11	56047.7	7673.77	53192.3	327022	1590.26
D7	11	58053.6	7806.16	55794	342026	1639.97
D8	11	56922.9	7776.77	55235.5	345980	2071.21
D9	11	67507.5	8871.5	53438	340842	2761.97
D10	11	100039	17752.7	59165.5	350411	5577.45
D11	11	63521.7	8003.72	44315.5	319856	2002.52
D12	11	68848.9	8504.68	41591.9	322726	2152.81
E1	11	90499.4	11984.1	44474.4	329397	2564.34
E2	11	67701.2	9110.09	43268.2	305503	1942.42
E3	11	65310.6	9652.15	49106.5	315135	2269.66
E4	11	65343.1	8825.83	50986.1	321311	1911.26
E5	11	67488.9	10124.1	57382.6	342126	1633.08
E6	11	55168.5	7832.99	55177	338794	2132.13
E7	11	59788.2	8118.7	58725.5	357162	1536.32
E8	11	56636.5	7967.81	55531.9	344789	1785.1
E9	11	57013.3	7547.86	52763.1	340291	1575.66
E10	11	60217.3	8138.12	50110.1	334948	2439.73
E11	11	73128.3	9838.18	49101.5	346065	2491.99
E12	11	83411.9	11295.5	43039.2	319404	3290.68
F1	11	72080.2	9384.4	42231.4	324116	2734.66
F2	11	62163.2	8328.67	43582.1	315237	2456.21
F3	11	54319	7367.67	46533.3	315309	2405.31
F4	11	62762.5	9173.38	51206.2	322591	3709.48
F5	11	70371.1	10064.9	54561.3	338001	3071.58
F6	11	67916.4	9904.16	55993.4	342679	2596.54
F7	11	58057.4	7696.83	54944.4	342864	1826.61
F8	11	63495.8	8932.72	55133	344715	2299.36
F9	11	58465.5	7721.26	51894.2	339301	2178.6
F10	11	67181.5	8731.44	49621.2	336115	2619.82
F11	11	66053.5	8897.27	46812.9	340256	1930.63
F12	11	82043.9	10108.4	42505.5	326485	2481.25
G1	11	91590.1	12500.2	43585.8	335374	3877.79
G2	11	77132.9	9746.06	45756.1	329964	2812.35
G3	11	52995.9	6720.08	44668.2	317629	2080.09
G4	11	62130	8734.89	48992.4	331796	2507.85
G5	11	66887.2	9520.88	54749.3	357779	2281.64
G6	11	69684	9505.83	52774.5	336787	2120.16
G7	11	69787.1	9654.55	50021.9	316901	1950.99
G8	11	67632.3	9208.48	54114.3	355782	9174.18
G9	11	70185.4	9672.76	52114.9	350462	1892.72
G10	11	69053.2	9369.12	47340.8	331959	2120.11
G11	11	103819	15130.2	47425.2	335264	3669.88
G12	11	89167.9	11789	42663.2	334001	2543.75
H1	11	96907.9	10250.5	37958	321603	5575.91
H2	11	99462.6	14350.5	44111.6	330118	3582.95
H3	11	67037.4	8926.23	45022.6	333939	2127.96
H4	11	65947	8752.34	46825.5	328795	2300.12
H5	11	73072.7	10138	53064.1	360807	2228.75
H6	11	70875.2	9592.72	50397	336206	1905.17
H7	11	61392.6	6974.05	4169.9	5748.13	1874.28
H8	11	77606.9	11442.7	7690.87	10481.5	4034.21
H9	11	53501.6	5512.41	3247.51	4662.58	1496.41
H10	11	57578.4	6340.06	3642.33	4847.39	1631.41
H11	11	67080	7354.14	4087.92	5626.07	1895.34
H12	11	76261.9	7542.85	4087.72	6695.7	1386.52
A1	12	125324	16020	39687.3	305201	4743.32
A2	12	115171	16656.9	48605.8	350399	6517.11
A3	12	77131.7	10522.4	47411.8	341249	3173.89
A4	12	65137.3	8761.62	48510.4	342673	1876.13
A5	12	59817.4	8291.67	49895.4	344566	1713.11
A6	12	71497	10637.7	53805.6	357110	3201.72
A7	12	60497.4	8021.93	51180.1	348410	1854.42
A8	12	66892.2	8468.61	51516.6	355341	2332.29
A9	12	70539.8	9687.82	48079.9	335123	2928.2
A10	12	70372.4	9043.15	42780.5	312311	2362.47
A11	12	77785.8	9808.69	40752.8	313855	2227.8
A12	12	77051.5	9956.39	32423.2	266580	3005.88
B1	12	108428	14076	40500.7	302608	3781.44
B2	12	77020.3	10609.2	46662.5	340800	3270.57
B3	12	64456.1	8529.48	44627.1	313559	1738.53
B4	12	59402.1	7674.97	47457.4	323627	1682.38
B5	12	62234.4	8768.46	47563.7	309775	2317.49
B6	12	58371.6	7733.35	49569.2	321178	1704.71
B7	12	58667.8	7862.56	52746.6	341998	1586.23
B8	12	62970.5	12579.1	61619.2	357463	1974.74
B9	12	60830.5	8094.9	51326	349540	1443.57
B10	12	56877	7402.72	45985.3	329390	2206.67
B11	12	62062.8	8091.11	41030	310054	2144.49
B12	12	63068.8	7634.93	33543.8	274871	2519.4
C1	12	122867	15129	46292.6	335635	3515.75
C2	12	73256.5	9769.18	45878.7	327551	2600.18
C3	12	59495.8	7808.98	46643.9	316910	2201.59
C4	12	61386.2	8501.36	49231.3	320154	1940.69
C5	12	56668.1	8019.97	51808.4	329515	2326.36
C6	12	55126.9	7463.99	49412.3	308736	1881.63
C7	12	181562	20946.3	60596.2	343721	3205.18
C8	12	60613.1	7896.97	52468	331315	1909.92
C9	12	60276.2	7937.79	52143.5	345426	1891.72
C10	12	57468.6	7593.55	47588.5	328807	1916.37
C11	12	60079.3	7270.47	45692.1	338900	1843.35
C12	12	63989.2	7705.4	38325.4	302034	2259.68
D1	12	63738.9	8476.91	43578.2	337678	2526.18
D2	12	70053.3	9708.29	46497.1	323441	2561.11
D3	12	59615.6	7729.47	47590.4	318133	2152.24
D4	12	68533.6	9702.56	50264.1	316580	2808.24
D5	12	60858.9	8566.46	53575.1	332624	1777.11
D6	12	56523	7685.38	53257.4	326822	1857.75
D7	12	58018.1	7827.11	55836.9	341805	1613.9
D8	12	57089.9	7667.64	54450.4	342244	2081.9
D9	12	67243.5	9263.98	53428.2	340404	2586.92
D10	12	101322	18048.5	59395.9	350832	5507.79
D11	12	63696.1	7916.7	44494.7	320134	1823.94
D12	12	68903.5	8872.25	41921.3	322285	2384.61
E1	12	90865.7	11680.1	44626.9	330811	3037.25
E2	12	68239.1	9095.64	43313.4	306104	2162.34
E3	12	65754.9	9733.86	49030.4	316461	2512.48
E4	12	65616.4	8969.97	50971.4	321301	2510.49
E5	12	67849.9	10212.7	57277.5	343192	1880.35
E6	12	55184.6	7925.17	55089.7	339006	2241.18
E7	12	59929	8035.19	58452.1	356905	1502.56
E8	12	56871.5	7647.2	55389.3	344438	1536.74
E9	12	56799	7508.12	52881	340319	1465.78
E10	12	60315.6	8166.87	49999.7	334521	2757.46
E11	12	72874.5	9956.31	48914.9	345202	2494.1
E12	12	83370.4	11365.3	42961.2	318613	3491.02
F1	12	72330.6	9709.98	42352.1	325262	2124.67
F2	12	62305.9	8357.16	43837.6	315835	2248.62
F3	12	54544.4	7770.31	46552.9	316035	2396.59
F4	12	62799.5	9293.29	51257.7	323052	3845.09
F5	12	70196.1	10185.7	54590.2	338056	2505.67
F6	12	68121.7	10091.4	56044.2	343012	2621.6
F7	12	58010.6	7714.7	55309.6	343916	2210.64
F8	12	63245.2	8955.2	54981.4	344346	2701.23
F9	12	58894.2	7909.22	52206.3	338802	2423.75
F10	12	67325.2	8544.98	49409.8	335472	2156.76
F11	12	65935.8	8364.63	46771.1	340684	1959.9
F12	12	82192.4	10172.3	42569.3	326544	2862.56
G1	12	92182.8	12529.4	43332.7	336306	3779.57
G2	12	77496.1	9974.12	45955.6	330238	2506.38
G3	12	53556.8	6789.76	44772.7	318078	2341.04
G4	12	68690.2	9280.06	49021.3	332409	2530.49
G5	12	73444.6	10657.8	54673.5	358189	1885.59
G6	12	75708.6	10235.7	52689.1	336963	2465.77
G7	12	78123	10462.8	49890.5	317337	1710.78
G8	12	76011	10353.7	54020.7	355698	9467.49
G9	12	79212.1	10724.6	52351.2	351956	2223.09
G10	12	75875.1	10197	47279.1	332310	2325.38
G11	12	110577	15696.7	47524.8	335012	4022.6
G12	12	96360.2	12792.9	42966.2	333769	2246.07
H1	12	102863	12047.7	38637.8	323198	5752.97
H2	12	103868	15355.6	43546	326754	3357.58
H3	12	73028	10020.9	45076	334771	2377.68
H4	12	70870.9	9723.43	46689.6	329372	2663.56
H5	12	78861.9	10921	53179.1	361828	2511.24
H6	12	75911.8	10142.2	50560.1	337929	2292.15
H7	12	60992.3	6776.17	4196.51	5549.23	1742.55
H8	12	77944.2	11479.8	7597.91	10575.9	4372.33
H9	12	53634.9	5705.4	3284.3	4425.02	1474.5
H10	12	57519.8	6284.86	3627.41	5032.55	1378.19
H11	12	66490.1	7401.6	4181.44	5666.3	2343.89
H12	12	76587.8	7673.88	4218.54	6175.33	1893.28
A1	13	126589	16361.2	40155.2	305858	4838.16
A2	13	115632	16484.8	48487.7	351025	6607.04
A3	13	77383.1	10545.1	47470.5	342098	3159.94
A4	13	65165.8	8642.35	48588	344227	2091.77
A5	13	60228.1	8213.37	49982.6	346040	1963.88
A6	13	71747.3	10672	53902.5	358418	2816.36
A7	13	60482.5	8019.9	51347.1	349789	1712.7
A8	13	67341.3	8686.11	51600.3	356692	2225.39
A9	13	70617	9575.67	48113.2	335945	3037.89
A10	13	70714	9192.74	43092.3	313594	2419.39
A11	13	77825	9737.79	41058.5	315659	2514.51
A12	13	77559	10059.4	32530.5	267552	3076.94
B1	13	109273	14024.1	40405.6	303423	4009.74
B2	13	77855.3	10846.9	46715.2	341056	2851.16
B3	13	65252.4	8392.55	44806.5	314140	2188.85
B4	13	59735.2	7832.19	47535.1	324077	1668.42
B5	13	62805.7	8701.12	47706.3	310973	2224.72
B6	13	58840.9	7863.48	49578.3	322104	1765.6
B7	13	59021.6	7663.72	52809.4	343035	1813.18
B8	13	63381.1	12468.3	61621.8	358461	1929.94
B9	13	61091.9	8103.57	51498.3	350296	1656.77
B10	13	57233.2	7554.53	45938.7	330196	2276.01
B11	13	62678	8060.75	41093.9	309985	2147.32
B12	13	63133.6	7770.79	33469.9	275449	1931.54
C1	13	123584	15686.2	46497.8	337496	3410.33
C2	13	73294	9903.23	46120.4	329239	2603.6
C3	13	59689.9	7960.88	46754	318756	2024.94
C4	13	61692.1	8304.36	49363.5	320653	1940.69
C5	13	57373.2	7950.86	51850	329861	2271.28
C6	13	55325	7622.09	49384.3	309533	1700.1
C7	13	181493	20831.8	60539.3	344194	3163.09
C8	13	60988.3	8080.43	52396.1	332442	2143.7
C9	13	60420.3	8041.08	52306.3	346848	1764.83
C10	13	57702.8	7541.95	47549.7	329397	1947.05
C11	13	60387.4	7711.17	45821.2	339302	2079.51
C12	13	64595.9	7884.57	38024.1	302448	2080.78
D1	13	64002.4	8352.38	43541.9	338492	2516.49
D2	13	70734.6	10111	46610	325537	2857.36
D3	13	59911.1	7934.83	47572.9	319486	2062.56
D4	13	68632.9	9605.62	50268.3	317269	2670.92
D5	13	61081.9	8447.27	53713.7	333727	1508.55
D6	13	56459.1	7833.28	53320.1	327434	1501.37
D7	13	58744.5	7606.78	55624.1	342436	1459.93
D8	13	57211.1	7585.36	54648.1	343745	1999.06
D9	13	67554.8	9112.08	53367.5	341735	2280.35
D10	13	101363	18200.8	59407.6	352613	5722.14
D11	13	64209.5	8198.69	44719	320528	1831.56
D12	13	68776.7	8666.53	41676.6	322878	2210.06
E1	13	90963.1	12087	44701.4	331456	2715.58
E2	13	68419.1	9153.46	43496.5	307206	2436.94
E3	13	66354.7	9792.06	49373.5	317165	2075.18
E4	13	65946.5	8811.52	51215	322362	2064.16
E5	13	67829.6	10372.5	57303.3	343887	1834.12
E6	13	55517.6	7733.59	55119.1	339382	1966.65
E7	13	60128.3	8073.23	58462.8	357504	1295.21
E8	13	57116.4	7703.66	55634.7	344725	1742.67
E9	13	57606	7761.58	52994.5	340248	1782.62
E10	13	60879.3	8249.93	50120.8	334862	2205.34
E11	13	73110	9963.97	48967.5	345660	2537.47
E12	13	83745.1	11200.4	42915.7	319719	3421.74
F1	13	72950.2	9698.8	42336.6	326025	2382.05
F2	13	62078.1	8394.71	43774.3	317084	2707.3
F3	13	54988	7771.41	46461.5	316459	2572.14
F4	13	63331.7	9279.97	51136.9	323655	3458.45
F5	13	70840.1	10264.1	54834.8	339696	2702.26
F6	13	68149.8	9832	56188.1	343937	2370.05
F7	13	58530.9	7550.1	54966.5	341782	1607.3
F8	13	63716.7	8938.08	55188.3	345460	2457.93
F9	13	58935.5	7669.05	51767.8	339277	2184.38
F10	13	67588.6	8970.03	49599.4	335953	2291.49
F11	13	66753.8	8270.56	46895.3	341066	2113.57
F12	13	82314	10252.4	42544.4	327085	2719.16
G1	13	92778.5	12744.6	43627.8	337065	3401.47
G2	13	77616	9789.87	46137.2	331236	3136.26
G3	13	53705.4	7036.98	44858	318661	2072.57
G4	13	79959.8	10718.4	49238.4	333066	2401.11
G5	13	85485.9	12192.1	54840.1	359062	2207.65
G6	13	86867.3	11546.7	52671.4	337417	2452.63
G7	13	92340.8	12272.9	49872.2	318548	2015.44
G8	13	92056	12442.9	54240.1	356709	9539.76
G9	13	95161.9	12913.9	52685.4	353048	2202.84
G10	13	88684.9	12039.2	47447.8	332643	2266.73
G11	13	123633	18055.1	47419	335039	3697.39
G12	13	108900	14766.2	42758.1	334061	2054.95
H1	13	112117	13149.5	38612.9	323333	5965.16
H2	13	113805	16645.8	43795	327062	3108.19
H3	13	84850.7	11450.4	45137.9	335636	2419.66
H4	13	80658.5	11214.6	47061.2	330714	2630.97
H5	13	89335.5	12329.7	53347.6	363062	2439.86
H6	13	85759.8	11569.1	50704.1	338944	2543.32
H7	13	61332.5	6937.44	4124.29	5805.9	1612.76
H8	13	78312.4	11471.5	7756.38	10610.3	4098.61
H9	13	54203.2	5849.14	3164.51	4432.57	1372.58
H10	13	57903.8	6266.46	3706.25	5075.36	1660.5
H11	13	67329.8	7443.92	4057.53	5702.98	2092.84
H12	13	76797.8	7858.36	4235.47	6419.01	1687.11
A1	14	127599	16017.1	39980.7	305480	4444.11
A2	14	115659	16758.4	48815.6	350902	6679.45
A3	14	76968.4	10483	47592.1	342108	3228.66
A4	14	65338.7	8635.49	48618.5	344338	1989.62
A5	14	60171.8	8178.49	50341.2	347042	1958.05
A6	14	71947	10529.9	54135.2	358819	2933.73
A7	14	60602	8074.06	51609.8	350432	2220.06
A8	14	67597.9	8536.49	51892.2	357387	2281.01
A9	14	70677.1	9546.54	48290	336699	3388.3
A10	14	70559.8	9057.57	43149.9	313559	2358.79
A11	14	78106	9853.52	41087.6	316100	2543.18
A12	14	77765.4	9916.68	32510.5	268437	3159.28
B1	14	109484	14318.2	40588.3	303603	3483.77
B2	14	77960.3	10961.3	46717.4	341790	3016.35
B3	14	65649.6	8419.2	44862.2	314243	1846.49
B4	14	59659.3	7895.24	47789.6	324322	1873.59
B5	14	62449.3	8648.75	48169.8	311370	1851.34
B6	14	59034.2	7977.08	49698.2	322739	1744.55
B7	14	59240.6	7735.4	52862.5	343082	1648.86
B8	14	63379.3	12505.5	61627	358629	2011.79
B9	14	61091	8098.84	51507.4	350538	1791.03
B10	14	57452.2	7310.09	46024.1	329808	1656.32
B11	14	62603.4	8167.48	41203.2	310324	2042.6
B12	14	63549.7	7443.83	33611.2	275837	1979.86
C1	14	124963	15563.6	46472.2	338544	3626.25
C2	14	74262.2	9700.38	46259.2	329676	2515.86
C3	14	60011.5	7875.67	46923.4	319584	2093.74
C4	14	61789.2	8358.73	49174.6	320490	2055.99
C5	14	57408.9	8098.51	52038	329378	2339.51
C6	14	55844.4	7449.43	49516.5	309620	1876.53
C7	14	181295	20774.6	60752.9	343700	2919.71
C8	14	61107.6	7907.52	52516.9	332128	2151.29
C9	14	60596	8027.84	52530.6	347347	1905.22
C10	14	57915.6	7582.68	47533	329717	1658.33
C11	14	60722.2	7732.21	45882	339579	1735.11
C12	14	64612.8	8028.93	38177.9	302232	1931.07
D1	14	64514.7	8301.55	43729.3	339096	2373.45
D2	14	71037.5	9795.57	46575.6	325847	2428.09
D3	14	59495.5	7682.16	47827.4	320364	1956.68
D4	14	68790.7	9728.55	50538.1	318022	2943.49
D5	14	60894.5	8551.45	53593.8	334074	1688.21
D6	14	56310.4	7804.63	53357.2	327699	1453.25
D7	14	58655.5	7941.15	55690.1	342446	1600.87
D8	14	57818.6	7665.04	54867.7	344654	2080.12
D9	14	67832.4	8932.82	53438	341912	2465.81
D10	14	101958	18402.7	59645.2	352953	5752.5
D11	14	63877.2	8157.93	44650.9	320828	1656.25
D12	14	69792.9	8760.12	41697.3	322909	2190.35
E1	14	91762.6	12203.9	44804.9	332142	2827.32
E2	14	69400.6	9161.9	43888.7	308565	2717.48
E3	14	66191	10076.3	49367.8	317710	2377.58
E4	14	66001.4	8892.95	51125.5	322545	1751.61
E5	14	67872	10262.2	57561.5	344835	1754.56
E6	14	55160.4	7904.38	55410.5	339597	1765.77
E7	14	60271.6	8079.73	58574.2	357665	1223.85
E8	14	57092.2	7953.69	55657.8	344848	1391.86
E9	14	57415.3	7377.1	53023.2	340553	1588.47
E10	14	61079.8	8114.69	49966.4	335076	2260.55
E11	14	73453.5	10311.8	48805.6	345972	2719.4
E12	14	83903.4	11363.4	43075.4	319800	3331.87
F1	14	72790.8	9381.61	42608.8	326186	2730.8
F2	14	62479.9	8269.1	43907	317551	2724.7
F3	14	55051.8	7407.38	46572.5	317783	2273.38
F4	14	63240.8	9458.73	51115.7	323216	4028.88
F5	14	71074.6	10331.6	55039.4	340508	2827.26
F6	14	68503.2	9698.64	56490.8	344721	2624.5
F7	14	58615.2	7695.89	55086.6	343019	1769.1
F8	14	63667.9	8953.06	55227.3	344623	2457.93
F9	14	59187.4	7749.11	51891.9	339145	2504.7
F10	14	67908.5	8941.07	49629.2	336332	2014.11
F11	14	66789.3	8684.97	47042.8	341319	2039.17
F12	14	82994.5	10225.7	42563.9	327074	2631.16
G1	14	93249.5	12884.4	43783.4	337369	3371.87
G2	14	77761.8	9873.62	46004.2	331883	2672.51
G3	14	53370.6	6738.06	44999.8	319677	2135.93
G4	14	100052	13427.8	49287.6	333699	2135.87
G5	14	106738	14600.2	54996	359457	2161.96
G6	14	107188	14138.1	52937.4	337538	2199.99
G7	14	117579	15484.6	50043.9	319096	2040.82
G8	14	120220	16203.8	54685.2	356890	9681.18
G9	14	123206	16612.8	52496	352803	1990.76
G10	14	110705	15015.4	47301.8	332728	1895.28
G11	14	145633	21023.5	47683	335154	3961.32
G12	14	131711	18522.5	42909.6	333562	2487.93
H1	14	128269	16098.5	38232.1	323355	5065.82
H2	14	128081	19251.5	43410.7	328198	2935.45
H3	14	105263	14670.1	45369.6	336966	2422.89
H4	14	97782.8	13413.1	47537.5	331524	2420.61
H5	14	108187	14790.4	53719.3	363757	2572.56
H6	14	103622	13977.6	51150.8	339430	2282.85
H7	14	61520.8	6766.28	4129.99	5453.57	1999.24
H8	14	78634.7	11335	7862.62	10750.6	4385.75
H9	14	53758.2	5704.4	3256	4293.99	1542.13
H10	14	57945.5	6325.11	3530.47	4873.08	1679.9
H11	14	67782	7314.38	4264.44	6163.24	2540.2
H12	14	76438.3	7261.82	4184.68	6290.09	1942.07
A1	15	128660	16034.1	40130.1	306511	4426.74
A2	15	115920	16966	48731.9	351105	6341.91
A3	15	77421.9	10554.9	47666.5	342078	3119.11
A4	15	65379.4	8880.89	48820.9	345057	1987
A5	15	60341.4	8179.2	50514.2	347127	1663.54
A6	15	72071.4	10753.6	54268.8	359179	3098.49
A7	15	60623.3	8135.67	51607.7	350414	1942.29
A8	15	67308.8	8476.92	51804.8	357270	2059.27
A9	15	70457.4	9718.4	47769.4	332795	3268.7
A10	15	70667.9	9113.44	43032	313629	2770.14
A11	15	78881.8	9900.43	41012.8	316410	2494.33
A12	15	78090.1	9956.39	32647.3	268575	3353.28
B1	15	110318	14258.3	40587.1	303856	3618.73
B2	15	78679.2	10781.9	46997	341855	3013.13
B3	15	65831.9	8842.87	44846.4	314777	1941.54
B4	15	59562.5	7807.45	47585.5	323839	1803.83
B5	15	62789.3	8451.24	48285.7	312388	2048.55
B6	15	58904.5	7706.03	49707.4	323069	1721.25
B7	15	59637.8	7666.03	52838	342830	1697.67
B8	15	63614.7	12506.3	61613.1	358328	2016.09
B9	15	61616.4	8089.39	51533.6	350004	1865.08
B10	15	57015.2	7407.01	46108.6	328868	1730.05
B11	15	62313.2	8138.96	41089.3	309778	1903.91
B12	15	63797.7	7835.96	33558	275254	2016.67
C1	15	126025	15787.1	46727.4	339906	3227.43
C2	15	74306	10087.1	46247.6	329917	2772.23
C3	15	60333	7896.97	47127.5	319989	2146.73
C4	15	62235	8339.12	49320.7	320407	1932.39
C5	15	57137.4	7884.89	51816.7	328723	2008.23
C6	15	55493	7523.63	49486.2	309394	1686.25
C7	15	180916	20729.8	60622.7	343183	3220.49
C8	15	61117.5	8030.1	52574.3	331592	2148.76
C9	15	60939.2	7951.03	52691.5	347358	2047.42
C10	15	57930.5	7475.86	47716	328789	2058.93
C11	15	61107	7784.25	45979.1	339240	1867.41
C12	15	64155	7820.12	38287.6	302150	1931.07
D1	15	65168.7	8443.87	43782.5	339599	2194.05
D2	15	71475	9920.26	46771.9	325570	2484.93
D3	15	60058.3	7747.75	47869.1	320813	2192.21
D4	15	68851.2	9845.48	50576.8	318123	2601.75
D5	15	61130.8	8272.46	53790.5	333370	1905.83
D6	15	56347.4	7944.02	53472.7	327029	1689.75
D7	15	58960.8	7799.95	55781.7	341813	1595.17
D8	15	57418.3	7581.03	55013.1	344629	1796.83
D9	15	68026.3	9320.59	53464.5	340867	2696.68
D10	15	102480	18241.5	59806.9	352274	5683.73
D11	15	64138.9	8086.33	44612.4	321160	1639.91
D12	15	69096.2	8585.6	41879	321814	2305.78
E1	15	92051.4	12253	44949.5	332685	2901.81
E2	15	69484.2	9128.16	43774.6	309089	2370.37
E3	15	67065.1	9944.27	49614.3	318039	2223.57
E4	15	65856.8	8917.16	51254.6	322657	2142.86
E5	15	68226.5	10526.1	57572.3	345166	1869.6
E6	15	55425.9	7964.93	55295.7	339236	1915.95
E7	15	60513.8	8048.18	58575.2	357170	1241.21
E8	15	57331.7	7907.31	55423.9	344405	1927.91
E9	15	57616.8	7557.53	52911.9	340017	1432.71
E10	15	60535.5	8359.62	50110.1	334889	1984.5
E11	15	73517.2	9913.65	48845.2	345551	2761.71
E12	15	84012.1	11424.5	43076.3	319469	2956.46
F1	15	72643.9	9793.82	42529.2	327432	2433.53
F2	15	62949.2	8298.89	43916.9	318012	2256.08
F3	15	54943.7	7656.69	46640	317296	2297.37
F4	15	63149	9589.75	51467.9	323389	3629.91
F5	15	71317.8	10192.3	55417.5	340811	2724.99
F6	15	68424.3	10233	56495.5	344863	2451.01
F7	15	58785.6	7599.01	55144.3	343102	1911.41
F8	15	63761.6	8890.98	55294.4	344001	2654.53
F9	15	58883.6	7804.8	51981.2	338452	2096.5
F10	15	67549.4	8936.44	49502.3	335777	2012.98
F11	15	66609.1	8821	47017	341108	2170.89
F12	15	82587.6	10179.3	42368.3	325148	3005.96
G1	15	93361.9	12773.8	43744.1	337741	3497.01
G2	15	77837.1	9679.06	46074.2	331706	2454.98
G3	15	53575.7	7069.57	45132	320049	2103.71
G4	15	133934	17983	49291.9	334114	1959.05
G5	15	143134	19532.3	54985.3	359875	2077.09
G6	15	141533	18867.9	53071.9	337765	2502.15
G7	15	158632	20851.1	50204.1	318604	2307.4
G8	15	164898	21851.6	54412.7	356414	9509.39
G9	15	168667	22653.6	52737.6	352563	1885.26
G10	15	148137	20447.2	47507.3	332609	1989.77
G11	15	183267	27068.7	47711.7	335431	3891.27
G12	15	169150	24435.1	42907.9	333789	1716.69
H1	15	154334	20233.3	38679.3	323554	5797.94
H2	15	163369	24714.8	44062	328965	3220.3
H3	15	140015	19712.6	45625.8	337802	2249.59
H4	15	127627	17480.6	47408.4	331931	2259.63
H5	15	141181	19062.3	53769.8	364914	2604.73
H6	15	134039	18164.4	51175.3	340394	1983.31
H7	15	61534	6768.26	4225.97	5770.86	1755.14
H8	15	78337.6	11532.7	7898.04	10788.6	3920.61
H9	15	54298.9	5707.41	3231.48	4309.07	1643.1
H10	15	58025.5	6290.61	3638.07	5090.35	1577.53
H11	15	67920.9	7359.27	4308.86	5878.09	2171.37
H12	15	76584.5	7829.05	4184.68	6521.2	1606.85
A1	16	128359	16070.7	40159.1	307049	4397.35
A2	16	116759	16811.5	49043.8	351603	6623.39
A3	16	78023.4	10444.5	47614.6	342683	3282.44
A4	16	65753.7	8730.73	48753.8	345439	2100.5
A5	16	60879.8	8280.99	50563	348500	1971.9
A6	16	72146	10612.3	54220.7	360206	3133.13
A7	16	60912	8213.52	51704	350912	1922.45
A8	16	67744.9	8572.51	51863.8	357530	2216
A9	16	70952.7	9755.54	47875.9	333620	3280.13
A10	16	70775	8997.19	43181.9	313967	2547.02
A11	16	78885.5	9770.11	41155.2	317255	2229.93
A12	16	78032.2	10123.8	32429.5	268078	3067.92
B1	16	111662	14213.1	40495.7	304021	3854.59
B2	16	79419.1	11064.7	47025	342070	2906.94
B3	16	66506	8710.53	44816.7	314878	2162.09
B4	16	59759.6	7734.03	47721.9	323957	1967.15
B5	16	63274.7	8596.38	48138.3	312780	2222.39
B6	16	59402.1	7822.5	49822.8	323000	1600.99
B7	16	60332.9	7847.15	52949.8	342906	1693.6
B8	16	63918.3	12450.9	61579.2	358570	1787.78
B9	16	61867.4	8177.61	51434.3	350476	1561.56
B10	16	57574.4	7419.88	46075.1	329603	1971.43
B11	16	62791.5	8367.13	41026.3	309688	1862.39
B12	16	63752.8	7454.88	33748.2	275485	2078.79
C1	16	127674	15872.9	46692.8	340420	3900.6
C2	16	76132.3	9906.79	46366.7	331564	2449.77
C3	16	60902.9	8035.9	47202.8	320583	1817.61
C4	16	62069.8	8175.99	49299.3	320230	2130.7
C5	16	57365.3	7862.12	51896.6	328240	2193.19
C6	16	55724.7	7513.92	49550.5	309420	1813.83
C7	16	181347	20640.2	60427.9	343370	3492.94
C8	16	61835	8184.34	52435.5	332030	2068.59
C9	16	61645.4	8167.33	52719.1	347812	1760.33
C10	16	58169.4	7567.29	47565.4	328539	1880.28
C11	16	60981.4	7237.25	45970.3	339074	1907.86
C12	16	64531.3	7884.57	38304	302636	2372.6
D1	16	65935.1	8628.12	43946.9	339818	2014.64
D2	16	72484.3	10031.2	46904.4	326431	2729.19
D3	16	61323.9	7979.99	47968.9	320575	2513.1
D4	16	69072.3	9529.66	50593.6	318662	3288.32
D5	16	61209.5	8530.26	53807.3	334288	1516.89
D6	16	56763.2	7621.89	53223.6	327323	1753.36
D7	16	59631.5	7918.65	55777.5	341589	1778.47
D8	16	58300.9	8038.33	55087.2	345009	1873.45
D9	16	68441.4	8921.5	53561.4	340868	2441.21
D10	16	102533	18388.6	59687.7	352721	5678.37
D11	16	63916.9	8095.14	44658.6	320751	1697.63
D12	16	69439.4	8601.2	41807.4	322117	2162.2
E1	16	93309.8	12469.3	45017.4	333698	2847.63
E2	16	70046.7	9510.06	43875.7	310770	2447.64
E3	16	67987.2	10178.2	49785.8	318893	2666.48
E4	16	66216.9	9048.1	51276.2	323272	1921.38
E5	16	68644.8	10471.5	57798.4	345893	1833.05
E6	16	55656.8	7940.53	55216.9	339441	1984.82
E7	16	60895.9	8091.79	58616.9	357384	1409.98
E8	16	57870.9	8042.41	55252.9	344549	1589.51
E9	16	58118.2	7813.13	52753.2	339493	1986.38
E10	16	61374.5	8317.02	50155.1	334962	2132.42
E11	16	73579.9	10086.5	48833.5	345277	2577.66
E12	16	84161.5	11284.8	43014.1	320148	3158.67
F1	16	73302.7	9619.15	42793.6	328098	2739.81
F2	16	63010.6	8328.67	44200.8	317974	2532.03
F3	16	55055.9	7748.24	46524.6	318380	2021.51
F4	16	63243.8	9467.61	51358.3	324191	3772.24
F5	16	71658	10427.3	55446.4	342001	2453.4
F6	16	68742.2	9970.84	56702.3	345531	2444.26
F7	16	58815.7	7748.56	55455.7	343636	1979.64
F8	16	64022.7	9221.71	55035.6	343826	2839.17
F9	16	58844.4	7866.29	51741.1	338224	2099.97
F10	16	68168.6	8535.71	49431.5	335610	2072.98
F11	16	67311.8	8540.06	47005.9	341162	2272.11
F12	16	82710.3	10021.4	42478.5	325426	2473.64
G1	16	93500.4	12666.2	43902.5	338171	3869.72
G2	16	77271.3	9860.74	46128.8	332260	2771.72
G3	16	53711.7	7058.34	45361.3	321071	2651.39
G4	16	185769	24611	49607.3	334721	1952.58
G5	16	197799	26874.6	55087.8	360741	2183.72
G6	16	193603	25286.8	53122	338099	2319.24
G7	16	215470	27953.1	50197.4	319436	1608.25
G8	16	227143	29978.4	54573.9	357500	9849.83
G9	16	231274	30960.5	52889.8	353940	1730.73
G10	16	202610	27961.7	47474.9	333033	1714.98
G11	16	237581	35036.6	47839.9	336482	3812.47
G12	16	223627	32745	42724.8	334257	2188.57
H1	16	192993	27213.7	38813.7	324462	4932.32
H2	16	208866	31847.4	43847.9	329145	3274.07
H3	16	193053	27313.2	45732.6	338111	2286.19
H4	16	174885	24262.5	47441.7	333214	2747.51
H5	16	192900	26185.9	54000.8	366060	2731.4
H6	16	182901	24599	51169.8	341600	2260.52
H7	16	61913.1	7000.76	4112.89	5551.12	2020.55
H8	16	78841.4	11560.6	7921.94	10973.9	4399.17
H9	16	54366.9	5736.56	3287.13	4443.88	1719.3
H10	16	58029.7	6282.56	3557.1	5205.94	1978.38
H11	16	68449.9	7567.04	4276.13	5887.55	2078.56
H12	16	76821.4	7437.68	4190.83	6720.86	1740.62
A1	17	130599	16521.9	40134	307179	4640.46
A2	17	117480	17028.5	48928	352181	6693.46
A3	17	78065.7	10694.9	47922.3	343392	3580.21
A4	17	65678.4	8803.67	48842.8	346588	2123.19
A5	17	60743.7	8300.21	50861	349516	1906.29
A6	17	72507.8	10840.1	54474.2	361268	2965.55
A7	17	61578.4	8304.92	51910.3	352098	1887.72
A8	17	68246	8773.38	51999.2	359257	2281.73
A9	17	71687.5	9708.94	47981.7	334652	3326.6
A10	17	71057.6	9286.46	43121.6	314346	2690.26
A11	17	79080.4	9992.18	41345.5	317839	2161.97
A12	17	78238.6	9972.49	32825.1	269308	3441.25
B1	17	112572	14362.1	40696	304973	3333.67
B2	17	80908.8	11281.5	47027.1	343203	2659.15
B3	17	68285.1	9057.92	44953.3	315496	1705.31
B4	17	59877.4	7755.58	47746.7	324396	1798.09
B5	17	63183.2	8756.49	48329.9	313888	2210.69
B6	17	59477.6	7971.33	49884.3	324156	1587.46
B7	17	61208	7890.3	52892.6	343646	1716.38
B8	17	65527.4	12639.5	61769.6	360029	1781.75
B9	17	62880.1	8257.95	51744.6	351273	1878.92
B10	17	57483.2	7431.88	45998.5	329737	1535.19
B11	17	62811.9	8198.76	41131	310624	2042.6
B12	17	63669.4	7769.69	33672.1	276351	1888.97
C1	17	129390	15996.9	47061	341308	3755.8
C2	17	76990.4	10378.9	46633.8	332310	2715.26
C3	17	62696.3	8226.7	47228.2	321718	1982.17
C4	17	62302.2	8340.01	49214.6	320573	2173.13
C5	17	57797.2	8255.58	51825.9	328380	2392.12
C6	17	56141.9	7476.48	49625.1	310474	1565.23
C7	17	182065	20845.8	60487.1	343666	3118.7
C8	17	62849.6	8250.9	52491.2	333111	2159.73
C9	17	62740.8	8155.85	52778	348576	1875.52
C10	17	58053.7	7462.28	47481.3	329251	1941.63
C11	17	61067.5	7386.73	45887.5	339781	1803.99
C12	17	64694.2	7737.63	38235.9	302562	1868.9
D1	17	68143.3	9009.33	43988	340326	2059.49
D2	17	74295.6	10490.1	46911.8	326863	2793.28
D3	17	62649	8127.29	48010.6	321504	2069.04
D4	17	69550.5	9940.43	50515.1	319420	2947.62
D5	17	61452.4	8467.58	53862.6	334548	1861.38
D6	17	56972.1	7856.51	53329.2	327831	1494.03
D7	17	60241.4	8028.04	55807.2	342449	1753.22
D8	17	59450.5	7966.44	55047.9	345599	1841.38
D9	17	69514.5	9474.38	53495.8	341707	2388.22
D10	17	102770	18466.5	59798.8	353704	5915.05
D11	17	64226.1	7907.88	44738.8	321607	1709.6
D12	17	69897	8749.4	41774.5	322634	1947.29
E1	17	94947.5	12514.9	44876.1	334024	3174.95
E2	17	71677.8	9866.66	44389.2	312604	2495.19
E3	17	69609.2	10118.9	49694.9	319102	2767.66
E4	17	66577.9	8662.98	51412.1	323881	2323.87
E5	17	68883.9	10274.6	58044.9	347044	2089.99
E6	17	56315.6	7993.85	55300.4	340568	2015.43
E7	17	61535.9	8033.33	58739	357947	1239.28
E8	17	58788.6	8117.02	55507.8	344874	1545.02
E9	17	58850.5	7700.36	52658.5	340143	1681.28
E10	17	61326.4	8047.6	50075.8	334978	2429.31
E11	17	73732.2	10165.2	48963.2	345261	2344.97
E12	17	84673.7	11109.2	43277	321039	3277.57
F1	17	73290.1	9852.5	42741	328413	2845.34
F2	17	63292.2	8271.69	44066.9	318846	2428.86
F3	17	55362.6	7439.37	46914.2	318624	2643.01
F4	17	63184.9	9005.72	51462.3	324141	3820.43
F5	17	72018.4	10080.2	55349.7	342556	2571.58
F6	17	68895.1	10233	56548.1	346464	2414.38
F7	17	58892.5	7764.55	55249	343601	1734.01
F8	17	64256	9189.6	55071.3	344301	2567.64
F9	17	59770.7	7852.37	51755	338309	2028.27
F10	17	68313.4	8588.99	49495.5	335352	2264.32
F11	17	67186.7	8587.09	47047.7	341747	2242.84
F12	17	83052.9	10190.9	42414.7	326085	2901.67
G1	17	93917.6	12211.3	43753.6	337878	3690.76
G2	17	77528.2	9993.45	46143.1	332504	2203.99
G3	17	54430.6	6951.58	45306.9	321072	2189.62
G4	17	250137	33536.4	49510	335968	1909.46
G5	17	266733	35789.1	55333.4	360761	2090.14
G6	17	258543	33755.5	53181.9	338899	2216.16
G7	17	280212	36150.8	50386.4	320178	1834.79
G8	17	297362	39151.9	54487.6	357824	9313.5
G9	17	304118	40994.5	52823.8	354570	1768.03
G10	17	268456	37167	47600.3	333254	1812.73
G11	17	303358	44665.6	48018	336543	3509.77
G12	17	290281	43917.9	42571.6	334340	2335.71
H1	17	241666	35179.9	38662.7	323379	5668.66
H2	17	265427	40760	44118.4	329596	3389.61
H3	17	259398	37127.5	45843.6	339472	2279.73
H4	17	237647	32683.1	47785	334401	2697.14
H5	17	262225	35767.1	54227.7	366586	2739.44
H6	17	247398	33409.2	51407.2	341890	2260.52
H7	17	62026.2	7109.59	4230.72	5720.66	1850.07
H8	17	79008.7	11537.4	7697.07	10255.6	4019
H9	17	54219.8	5822	3287.13	4274.19	1628.81
H10	17	58548.2	6208.96	3712.64	4911.61	1544.13
H11	17	68300	7404.16	4128.84	5950.26	1733.52
H12	17	76636.5	7804.91	4298.57	6180.04	2009.74
A1	18	131074	16572.7	40311.1	307285	4791.41
A2	18	118888	17263.2	48952.1	351893	6436.52
A3	18	79574	10854.5	47658.7	343429	3254.55
A4	18	66084.2	8780.5	48930	346648	2199.15
A5	18	60686.6	8409.11	50799.6	350063	1879.32
A6	18	72652.2	10825	54585.5	361256	3029.19
A7	18	62292.7	8228.42	51759	351760	2052.83
A8	18	69096.3	8801.78	51891.5	358802	2192.17
A9	18	72435.1	9915.03	48207.6	334376	3430.2
A10	18	71127.2	9190.94	43145.4	314329	2541.51
A11	18	78837.5	10096.4	41220.7	318309	2501.77
A12	18	78676.4	10012.2	32659.9	268811	3189.73
B1	18	115314	15115.3	40926.2	305216	3660.35
B2	18	83333.6	11438.8	46864.7	342979	3159.01
B3	18	70277	9137.88	45029.5	315735	2241.45
B4	18	60393.6	7726.05	47754.1	324519	1748.03
B5	18	63762.6	8694.39	48535.6	313781	2158.47
B6	18	59582.1	7998.65	50042.9	324084	1898.64
B7	18	62728.2	8341.16	52967.7	342786	1866.05
B8	18	67088	12873.6	61660.1	359702	2122.07
B9	18	64281.9	8459.6	51506.5	350702	1778.83
B10	18	57925	7609.43	46123.5	328967	2264.6
B11	18	62864	8311.01	41126.3	309823	1852.96
B12	18	64103	7706.72	33678.6	276148	1877.47
C1	18	132152	16834.8	46882.7	342277	3449.7
C2	18	79355.8	10668.4	46773.8	332851	2660.57
C3	18	64673.4	8599.97	47300.6	322503	2207.16
C4	18	62312.1	8419.35	49224.8	319787	1882.58
C5	18	57871.9	8010.55	51805.9	328296	2397.05
C6	18	56051.6	7540.27	49604.4	310161	1643.24
C7	18	182640	20916.2	60368.6	342582	3316.92
C8	18	64265.8	8491.19	52576.9	332643	2068.59
C9	18	64617.2	8347.43	52865.3	348281	2098.71
C10	18	58427.9	7801.76	47564.4	328953	1919.98
C11	18	61203.5	7558.36	45837.8	339587	2203.06
C12	18	64918.9	8071.47	38269.9	302629	2198.78
D1	18	70644.4	9245.69	44081.1	340400	2437.69
D2	18	76387.3	10944	47109.4	327710	2345.87
D3	18	65435	8616.49	48049	321439	2433.15
D4	18	69372.9	9936.43	50780.8	318964	2957.94
D5	18	61503	8481.7	53783	334645	2161.43
D6	18	56721.8	7677.64	53417.4	327740	1195.55
D7	18	61454.8	8121.91	55870.7	342051	1670.12
D8	18	60681.1	8126.67	55235.5	345754	2151.39
D9	18	70852.5	9259.26	53533	341108	2444.05
D10	18	102925	18637.4	59961.4	353648	5915.05
D11	18	64516.5	8324.26	44443.1	321410	2002.52
D12	18	69601.2	8640.2	41785.8	322503	2145.3
E1	18	97547.7	12711.3	45076.4	334081	3037.25
E2	18	74258.6	10170.2	44364.2	313411	2250.3
E3	18	71711	10453.5	49688.1	319365	2469.76
E4	18	67045.7	9019.49	51509.6	323918	2054.04
E5	18	69169.1	10579.7	58134.9	346920	2209.33
E6	18	56226.3	7674.85	55543.4	339977	1937
E7	18	62352.9	8364.58	58781.7	357230	1354.04
E8	18	59849.9	8068.62	55279.1	341951	1581.24
E9	18	59435.3	7716.47	53017.7	339712	2034.39
E10	18	61166.8	8308.51	50038.3	334983	2450.15
E11	18	73837	9956.31	49059.7	344579	2671.8
E12	18	84682.6	11401.2	43393.1	320848	3491.02
F1	18	73459.4	9599.59	42761.5	329474	2795.15
F2	18	63364.8	8155.15	44228.1	318843	2574.29
F3	18	55047.7	7691.99	46931.6	318066	2343.16
F4	18	63727.2	9516.47	51270	323973	3360.95
F5	18	72247.2	10499.1	55641	343195	2795.45
F6	18	68980.5	10007.4	56688.2	346500	2532.93
F7	18	58810.6	7855.79	55287.5	343870	1744.73
F8	18	64241.7	9120.03	55185	343760	2630.63
F9	18	59722	7757.23	51828.1	338690	1978.55
F10	18	68498.4	9012.88	49578.9	335379	2619.82
F11	18	67584	8663.36	47116.6	341423	2486.76
F12	18	82841.3	10235	42590.9	325849	2611.61
G1	18	94316.3	12775.3	43807.8	337208	3766.11
G2	18	77575.2	9970.26	46177.5	332126	2506.38
G3	18	54040.3	7110.03	45289.8	321436	2387.21
G4	18	314645	42361.6	49799.8	335490	1858.78
G5	18	335410	44519.6	55462.6	361426	2152.16
G6	18	323678	41888.3	53375.2	339126	2290.94
G7	18	337338	43529.7	50440.1	319800	1917.79
G8	18	361037	47422.8	54725.7	356846	9461.2
G9	18	369285	49637.4	53117.6	354036	1771.23
G10	18	331636	46145.3	47365.6	332967	2130.97
G11	18	366865	54281.4	48113.9	337161	4082.64
G12	18	354001	53721	43039.4	333642	2521.76
H1	18	288385	42184.6	37999.5	322539	5172.61
H2	18	320566	49369.8	43845.7	329342	3277.5
H3	18	326049	46948.8	45820.1	339625	2432.57
H4	18	304986	42298.8	48052	334314	2474.93
H5	18	336103	46004.1	54346.7	366931	2646.96
H6	18	316860	42621.5	51645.5	342784	1850.28
H7	18	61969.7	7010.65	4241.18	5804.95	1872.35
H8	18	79527.6	11772.2	7766.12	10732.1	4269.46
H9	18	54678.6	5774.76	3262.6	4653.16	1537.37
H10	18	58726.4	6404.46	3556.04	4952.28	1759.64
H11	18	68733.8	7642.72	4308.86	5359.85	2391.48
H12	18	77417.8	7354.93	4367.82	6818.33	1949.94
A1	19	133013	17025.3	40227.9	307742	4838.16
A2	19	121182	17550.9	48949.8	352469	6772.88
A3	19	81821.3	11260.5	47829.2	343678	3450.74
A4	19	66074	8584	48836.7	346622	1911.92
A5	19	60726.9	8274.58	50831.4	350093	2126.44
A6	19	72456.5	10782.4	54600.5	361731	3110.51
A7	19	63531.8	8346.22	51749	352498	2079.76
A8	19	70270.6	9155.74	51892.9	359066	2564.15
A9	19	73662.6	9993.68	48095.1	335096	3183.39
A10	19	71308.1	9126.96	43234.1	314436	2687.5
A11	19	78912.1	9836.84	41179.1	317938	2609.01
A12	19	78788.2	10172.1	32635.7	268726	3319.44
B1	19	119302	15943	40747.3	304862	3598.55
B2	19	88622.8	12381.8	47078.8	343188	3286.66
B3	19	74718.1	9918.13	44923.5	315988	1923.09
B4	19	60473.9	7954.29	47788.8	324514	1600.31
B5	19	64083	8692.15	48281	314304	2122.61
B6	19	59612.8	7862.77	50090.8	324583	1790.4
B7	19	65551.5	8550.01	52752.3	342891	1586.23
B8	19	69779.7	13210.3	61576.6	359425	2073.82
B9	19	67524.6	8792.78	51408.9	350374	1829.28
B10	19	57628	7557.11	45804.9	328725	2008.3
B11	19	62697.5	8239.25	40983.8	309704	2034.1
B12	19	64271.2	7655.91	33797.2	276091	1915.43
C1	19	137370	17497	47070	342523	3421.76
C2	19	84249.4	11369.5	46644.3	333965	2887.32
C3	19	69538	9434.5	47334.5	322043	2156.03
C4	19	62890.4	8539.69	49030.3	319492	1925.01
C5	19	58229.2	8125.21	51725.2	327763	2348.55
C6	19	56559.1	7687.28	49506.1	310149	1645.42
C7	19	185296	21318.5	60228.3	342466	2776.6
C8	19	67927.5	9060.24	52574.3	332600	2203.62
C9	19	67922.3	8917.76	52641.9	348635	1983.52
C10	19	58437.2	7658.73	47505.3	327908	1827.95
C11	19	61217.4	7631.44	45667.8	339342	2019.38
C12	19	64987.7	7891.01	38172.8	302714	1767.4
D1	19	76268.5	10272.4	43905.8	341248	2545.58
D2	19	82179.5	11644.7	47046.8	327533	2764.25
D3	19	70741.7	9143.33	47998.6	321758	1747.07
D4	19	70226.3	9802.51	50842.5	319341	2527.41
D5	19	61234.4	8498.48	53877.6	334688	2225.32
D6	19	57263.8	7878.2	53523.8	327679	1303.2
D7	19	64781.5	8623.08	55448.5	341400	1490.07
D8	19	63853.9	8366.58	54998.5	345604	1841.38
D9	19	74014.5	9753.64	53339.1	341121	2352.27
D10	19	103026	18486	59800.6	353265	5970.42
D11	19	64407.2	8286.81	44639.9	320978	1935.01
D12	19	69959.9	8796.2	41815.9	321801	1979.2
E1	19	102839	13560.2	45288.9	334658	2673.82
E2	19	78536.4	11022	44525.9	314808	2315.69
E3	19	75637.3	11222.4	48616.9	312427	2609.15
E4	19	67622.2	9141.62	51252.4	324322	2052.92
E5	19	69355.6	10475.6	58009.5	347887	1813.69
E6	19	56397.7	8077.89	55410.5	340631	1756.21
E7	19	64640	8590.04	58446.3	356866	1740.77
E8	19	61199.1	8316.64	55116.5	342425	1354.61
E9	19	61525.1	8214.8	52552.7	339220	1871.17
E10	19	61317.2	8475.7	50114.4	335198	1995.95
E11	19	73941.7	9931.16	48810.9	344950	2331.21
E12	19	84496.7	11173.2	43097.7	320406	3527.53
F1	19	73172.6	9796.61	42665.2	329280	2692.19
F2	19	62837.8	8310.54	43878.5	319116	2908.67
F3	19	55404.8	7562.92	46667.2	318728	2387.87
F4	19	63683.2	9296.62	51132.4	323809	3876.47
F5	19	72110.7	10381.6	55605.4	343789	2893.17
F6	19	69178.5	10007.4	56722.1	346873	2264.02
F7	19	58828.2	7668.61	55226	343630	1962.09
F8	19	64455.9	9022.63	54963	344226	2325.43
F9	19	59836.4	7718.94	51712.1	337898	2142.75
F10	19	68366.7	8946.86	49281.8	335287	2394.52
F11	19	67669.9	8686.25	47115.4	341436	2385.54
F12	19	83264.5	10135.1	42386.6	325664	2814.76
G1	19	94448.7	12630.9	43510	338177	3670.58
G2	19	77242.9	9966.39	45808.4	332176	2760.96
G3	19	54115.6	7123.51	45360.2	322046	2434.46
G4	19	367798	49524.9	49842.6	335966	2147.73
G5	19	391696	51899.8	55374	361914	2151.07
G6	19	378090	48967.2	53369.4	340126	2477.89
G7	19	381588	48980.4	50510.2	320077	1716.64
G8	19	409234	53464.7	54504.2	357122	9285.22
G9	19	418615	56043.8	52872.8	355211	2058.97
G10	19	380645	53107.5	47865.3	333163	1930.04
G11	19	416106	61896.6	48142.6	337600	3669.88
G12	19	404401	61528.9	43152.7	333645	2246.07
H1	19	326546	48147.1	37890.1	322763	4853.63
H2	19	366320	56524.1	43885.1	329875	3427.36
H3	19	380221	55114.1	45899.1	339780	2400.28
H4	19	364013	50637.8	48237.8	335532	2733.68
H5	19	400806	54785.5	54626.2	367255	2709.28
H6	19	377138	50558.1	51627.4	342989	1905.17
H7	19	62058.9	7037.37	4228.82	5755.7	1935.31
H8	19	79792.1	11946.7	8077.76	11040	4320.45
H9	19	54928.8	5727.52	3209.78	4590.94	1333.53
H10	19	58627.2	6419.41	3752.06	5297.98	1687.44
H11	19	68708.2	7518.31	4217.68	5795.26	2303.43
H12	19	77626.1	7799.74	4143.12	6238.21	2041.22
A1	20	137460	17422.9	40336.2	307219	4672.52
A2	20	125223	18348.2	49009.4	352799	6350.09
A3	20	86409.9	11848.9	47818.4	343837	2906.99
A4	20	66171.7	8901.48	48807	347255	2244.54
A5	20	61304.7	8318	50855.8	350968	2001.06
A6	20	73026.9	10841.4	54733.4	362460	3329.71
A7	20	66207.5	8934.54	51975.3	352905	1784.98
A8	20	73340.4	9427.96	51947.5	359607	2001.48
A9	20	76158.9	10400	48308.1	335777	3179.58
A10	20	71568.3	9293.67	43066.7	314935	2229.33
A11	20	79356.3	9897.31	41269.6	318818	2440.18
A12	20	78886.8	10101.3	32709.4	269405	3187.47
B1	20	127752	16938.4	40946.2	305434	3527.91
B2	20	98202	13954.1	47142.2	343563	3118.25
B3	20	83795.8	11129.4	44923.5	316746	1685.01
B4	20	60933.4	7905.61	47688	324262	1693.86
B5	20	64495.7	8854.5	48568.7	314921	2271.49
B6	20	59766.8	8020.94	50171.2	325009	1927.2
B7	20	71366.1	9314.54	52922.8	343546	1892.08
B8	20	75841.5	13940.8	61732.2	360239	1699.03
B9	20	73292.3	9672.61	51487.7	350723	1818.7
B10	20	58000.1	7386.43	45966.9	329102	2109.24
B11	20	63243.2	8321.13	41118.9	309960	2076.56
B12	20	64252.5	7761.95	33836.3	276719	1845.26
C1	20	147107	18829.5	47232.9	343428	3406.52
C2	20	93546.1	12693.4	46899.8	334856	2568.28
C3	20	78195.8	10254.2	47530.2	323175	2001.7
C4	20	63153.7	8546.82	48977.3	319389	2174.98
C5	20	58361	8149.56	51654.5	327232	2243.33
C6	20	56944.9	7663.01	49658.3	310484	1643.24
C7	20	191605	22109.8	60236.9	342647	3208.24
C8	20	74386.2	9489.67	52718.3	333389	2331.91
C9	20	74164	9511.04	52904.9	349033	2058.22
C10	20	58574.4	7872.38	47372.2	328184	1934.42
C11	20	61539.5	7391.16	45829	339716	1729.65
C12	20	65173.1	7887.15	38329.2	303072	2306.62
D1	20	87275.9	12047.6	44043.6	341329	2259.5
D2	20	92529.5	13013.8	47065.2	328603	2607.06
D3	20	80872.8	10683	48171.9	322425	2022.58
D4	20	70849.1	9794.51	50753.6	320252	2823.72
D5	20	61969.7	8425.2	53884.1	335320	2010.48
D6	20	57641.2	7922.33	53387.7	328538	1604.94
D7	20	70495.7	9034.26	55517.8	341802	1620.42
D8	20	69889.2	9473.47	54983.9	346249	2005.29
D9	20	79297.3	10525.4	53240.2	341182	1928.37
D10	20	103626	18559.5	59964.1	354040	5893.61
D11	20	64667.7	8285.71	44605.8	321301	1675.85
D12	20	70274.2	8642.15	41779.2	322453	2113.4
E1	20	112546	15198.2	45211	335382	2551.92
E2	20	88064.1	12083.3	44509.2	316058	2704.41
E3	20	84939.6	12583.4	48821.4	313612	2493.36
E4	20	68741.3	9358.39	51494.9	324900	2354.22
E5	20	70371.1	10634.4	58067.4	348485	2055.59
E6	20	57010.7	8094.15	55509.2	341744	1978.13
E7	20	68279.6	9071.6	58679.9	357661	1285.57
E8	20	65088.9	8717.91	55118.6	342527	1560.54
E9	20	65306.6	8447.85	52879.9	339507	1525.52
E10	20	61844.1	8450.14	50084.4	335591	2048.04
E11	20	74601.8	10040.5	49034	344992	2005.44
E12	20	84477.9	11160.6	43156.2	321008	3195.19
F1	20	73511.1	9825.95	42888.6	329739	2373.04
F2	20	63118.2	8438.73	43975.2	319182	3132.41
F3	20	55225.7	7582.78	46848.9	318998	2281.01
F4	20	64066.7	9458.73	51403.1	324206	3765.52
F5	20	72371.2	10526.4	55567.6	344793	2980.67
F6	20	69162.4	10123.4	56771.9	347108	2509.8
F7	20	59239.9	7686.49	55207.7	344145	2067.36
F8	20	64709.3	9102.9	55099.5	344008	2587.19
F9	20	60084.1	7828	51832.7	338341	2466.54
F10	20	68615.9	8899.38	49481.8	335289	2059.4
F11	20	67622	9039.65	47174.4	341269	2407.49
F12	20	83038.9	10462.5	42479.6	326214	2570.33
G1	20	94439.4	12569.4	43852.4	337443	3690.76
G2	20	77425.7	9996.03	45963.9	332503	2463.35
G3	20	54434.8	6963.94	45408.2	321923	2572.99
G4	20	405122	54345.5	50145.2	336469	2034.53
G5	20	431715	57078.7	55492.5	362482	2225.06
G6	20	416084	53992.4	53686.4	340912	2159.57
G7	20	411562	52891	50529.3	320139	2057.42
G8	20	442241	57655.8	54637.3	357190	9441.3
G9	20	452294	60421.3	53219.8	355689	2328.6
G10	20	415516	57640.1	47627.4	333381	2052.77
G11	20	451996	66939.6	48354.3	337933	3263.36
G12	20	439080	67704.3	43124.4	333662	2866.79
H1	20	352601	53349.8	37794.6	322006	4944.97
H2	20	400864	61675.7	43946	329586	3226.02
H3	20	420370	60853.3	46014.4	340425	2194.7
H4	20	406787	56552.2	48181.1	335969	2914.41
H5	20	447762	61107.3	54743.1	368235	2523.3
H6	20	421157	56267.5	51998.9	343330	2113.54
H7	20	62220.6	7067.05	4296.29	5695.09	2193.93
H8	20	80511	11925.4	8002.51	11236.8	4451.94
H9	20	55043.7	5765.71	3474.83	4667.3	1791.69
H10	20	59043.3	6207.81	3675.35	4909.47	1612.01
H11	20	68941	7502.92	4300.68	6061.48	2387.91
H12	20	77821	7865.25	4401.68	6623.38	1811.44
A1	21	145085	18677.7	40430.1	307897	5204.16
A2	21	133515	19698.7	48977.3	353398	6687.62
A3	21	94110.4	13085.7	47931.1	343991	3204.76
A4	21	66660.9	8744.46	49151.6	347274	1816.76
A5	21	61356.8	8433.31	51080.6	351385	1831.2
A6	21	73360.7	10918.3	54758.5	362381	3395.47
A7	21	70757.2	9344.81	52185.8	352950	1918.19
A8	21	77833.8	9918.37	52226.3	360125	2217.45
A9	21	79866.4	11115.2	48435.8	336353	3140.73
A10	21	71562.9	9258.53	43277	314855	2297.28
A11	21	80180.2	9933.8	41335.1	318717	2652.55
A12	21	78563.4	10123.8	32675.7	269259	3107.39
B1	21	142765	19601.1	41063.9	305673	3891.17
B2	21	115982	16494.7	47322.9	343421	3012.06
B3	21	99492.8	13374.6	45258.1	316771	1901.86
B4	21	61449.7	8162.59	47676.4	324337	1985.2
B5	21	65499.2	8913.6	48708.2	315131	2240.31
B6	21	60364.2	8056.17	50168.2	325256	1779.13
B7	21	81460.2	10562.3	52900.8	343238	1538.23
B8	21	85967.8	15174.2	61656.6	359781	1993.69
B9	21	83797.6	11020.3	51510.6	350001	1853.69
B10	21	58187.2	7568.26	46037.3	329298	2069.74
B11	21	63526.3	8225.44	41131	310027	2045.43
B12	21	63815.1	7724.4	33773.2	276894	1920.03
C1	21	164064	21303.7	47343.2	344272	3169
C2	21	109691	15066	46975	334780	2474.84
C3	21	93637.3	12478.1	47518	323464	2247.14
C4	21	64121.4	8651.12	49166.2	319145	1931.47
C5	21	59311.4	8295.63	51621.2	327602	2187.44
C6	21	57459.4	7577.02	49734.4	311042	1778.84
C7	21	202625	23436.2	60251.7	342342	3271.76
C8	21	85444.7	10916.8	52792	333138	1988.41
C9	21	86131.3	11266.2	53079.6	349247	1941.22
C10	21	59284.5	7748.35	47489.6	328076	1614.12
C11	21	61882.4	7574.97	45886.4	339203	1931.91
C12	21	65232.1	8142.36	38393.5	302611	1974.21
D1	21	107068	14991.8	44095.6	341166	1863.12
D2	21	111249	15481.4	47119.2	328126	2406.33
D3	21	99632.2	12997.9	48371.6	323114	2016.1
D4	21	71236.6	10035.4	50865.5	320095	2834.05
D5	21	62738.2	8728.91	54081.7	335027	2058.63
D6	21	58778.2	8152.31	53505.7	328380	1385.56
D7	21	80663.2	10492	55592	341067	1525.92
D8	21	80519.5	10477.3	55085.4	345527	2080.12
D9	21	90105	11808.5	53485	340794	2556.65
D10	21	103429	18554.2	60101.4	354337	5610.5
D11	21	65035.4	8263.68	44787.2	321677	1877.3
D12	21	70056.7	8672.38	41736.9	321867	2162.2
E1	21	130420	17930.5	45538.1	335419	3108.36
E2	21	103814	14573.5	44722	316477	2472.6
E3	21	102223	14651.7	49092.9	314567	2078.55
E4	21	69757.7	9534.45	51432.5	325138	1758.36
E5	21	71733.8	10598.3	58159.6	348897	1959.91
E6	21	57514.3	7950.47	55825.3	341984	2057.52
E7	21	75433.4	9963.26	58732.2	357419	1565.25
E8	21	71929.3	9348.03	55079.8	342482	1449.81
E9	21	71555.4	9251.18	52729	339106	1548.99
E10	21	61747.9	8416.06	50186.2	335215	2301.18
E11	21	74111.3	10015.4	48930	344882	2544.87
E12	21	85114.7	11183.9	43226.8	320757	3458.25
F1	21	72948.8	9570.25	42701.2	329746	2436.1
F2	21	62879.2	8329.96	43983.9	318780	2793.07
F3	21	55333.8	7358.85	46673.7	318797	2552.51
F4	21	63664.3	9486.49	51333.7	324269	3840.6
F5	21	72708.5	10469.8	55923.5	344707	2539.76
F6	21	69738.7	10142.6	56805.8	347254	2829.79
F7	21	59176.4	7838.86	55499.9	344111	2148.26
F8	21	64641.4	9069.72	54914.3	343214	2730.56
F9	21	59822.6	7897.62	51540.4	337927	2091.87
F10	21	68843.4	8959.6	49558.3	335178	2725.11
F11	21	67950.7	9010.41	47128.9	342079	2248.94
F12	21	83395.5	10455.5	42451.5	326120	2774.56
G1	21	94633.4	12700	44108.2	337693	3667.89
[truncated: 11,255 more rows]

## Sheet: Multicomponent Data
Block Type	96alum
Chemistry	SYBR_GREEN
Experiment File Name
Experiment Run End Time	Not Started
Instrument Type	sds7500
Passive Reference	ROX
Well	Cycle	SYBR	ROX
A1	1	108685	287365
A2	1	103395	328590
A3	1	72380.6	321335
A4	1	61470.1	315336
A5	1	56545.5	322663
A6	1	65244.8	334284
A7	1	56396.1	323761
A8	1	63222.9	332233
A9	1	65843.1	313842
A10	1	65684.7	289160
A11	1	74899.9	297831
A12	1	73519.8	254716
B1	1	99149.7	286397
B2	1	70395.1	320873
B3	1	60071.9	302514
B4	1	56001.6	309259
B5	1	57194.7	296197
B6	1	55538.6	309168
B7	1	55915	325501
B8	1	59952.6	339853
B9	1	56330.2	328527
B10	1	54580	315340
B11	1	57620.9	297021
B12	1	58469.4	264992
C1	1	108212	315755
C2	1	67085.9	306276
C3	1	55062.2	304201
C4	1	57442.3	305441
C5	1	53668.7	316012
C6	1	52133.5	301129
C7	1	176841	331312
C8	1	56162.1	318687
C9	1	56446.1	336546
C10	1	53428.4	317453
C11	1	56123.3	326489
C12	1	59967.7	292591
D1	1	60392.7	316728
D2	1	64948.5	307038
D3	1	55663.5	307005
D4	1	62595.4	299202
D5	1	56056.9	315439
D6	1	52692.2	321520
D7	1	54414.5	330430
D8	1	53636.5	334466
D9	1	62771.4	326454
D10	1	89693.2	332874
D11	1	58662.5	306729
D12	1	64328.4	313639
E1	1	85215.1	310654
E2	1	63034.9	296875
E3	1	61034.5	298401
E4	1	59945.8	302684
E5	1	62028	325129
E6	1	51987.6	329594
E7	1	56240	340182
E8	1	53482.6	329811
E9	1	53493.8	325842
E10	1	56825.2	323914
E11	1	68645.6	333324
E12	1	79582.4	309982
F1	1	65874.3	301159
F2	1	58887.7	298419
F3	1	52073.1	299669
F4	1	59052.6	302848
F5	1	65066.2	319610
F6	1	61535.8	323358
F7	1	54616.1	331544
F8	1	59899.2	330352
F9	1	55085	324649
F10	1	62795.1	326599
F11	1	60954.2	327662
F12	1	75923	316126
G1	1	81078.1	310242
G2	1	76023.1	308516
G3	1	50104.5	303846
G4	1	52092.5	310033
G5	1	55994.9	333739
G6	1	58346.5	322992
G7	1	56467.2	297566
G8	1	54428.5	342628
G9	1	56387.4	328661
G10	1	57191.3	313789
G11	1	87390.3	327620
G12	1	77905.4	328238
H1	1	83847	300401
H2	1	87486.2	307729
H3	1	58461.2	317299
H4	1	56836.3	308196
H5	1	63124.3	337698
H6	1	60898	314806
H7	1
H8	1
H9	1
H10	1
H11	1
H12	1
A1	2	112324	294675
A2	2	105557	337125
A3	2	73037.9	328846
A4	2	61831	323566
A5	2	56636.3	330017
A6	2	66614.5	343106
A7	2	56839.9	332046
A8	2	63701.9	340149
A9	2	66240.1	321437
A10	2	66064.2	297146
A11	2	74334.5	304275
A12	2	73786	259761
B1	2	98495.6	293655
B2	2	71494.9	328773
B3	2	60285.5	307466
B4	2	56005.1	314220
B5	2	57460.7	301140
B6	2	55533.7	315159
B7	2	55703.2	331188
B8	2	60418.8	346426
B9	2	56737.3	335450
B10	2	54546.1	322720
B11	2	57848.6	301960
B12	2	58779.4	270477
C1	2	110070	323849
C2	2	67550.2	311273
C3	2	55546.2	309076
C4	2	57624.3	311818
C5	2	54082.1	322025
C6	2	52761.5	305210
C7	2	177482	336582
C8	2	56639.9	325017
C9	2	56840.9	343285
C10	2	53910.1	324857
C11	2	56924.2	334471
C12	2	60471.5	298561
D1	2	61005.5	323095
D2	2	65704.1	312243
D3	2	56154.8	312348
D4	2	62941	304155
D5	2	56813.7	322587
D6	2	53185.3	326266
D7	2	55050.3	335002
D8	2	53867.9	339939
D9	2	63140.1	333211
D10	2	90482.7	338151
D11	2	59513.5	313743
D12	2	65300.3	319232
E1	2	84806.1	316429
E2	2	63614	302139
E3	2	61735.6	304372
E4	2	60280.6	310127
E5	2	62552.1	332035
E6	2	52198.8	335769
E7	2	56714.7	348250
E8	2	53722.6	337396
E9	2	53954.5	333789
E10	2	57263.4	331020
E11	2	69065.7	340031
E12	2	79837.1	316178
F1	2	65808.1	307954
F2	2	59040.6	303406
F3	2	51706.1	305428
F4	2	59598.9	310247
F5	2	65303.6	326910
F6	2	62360.2	330644
F7	2	54783.1	340287
F8	2	60137.3	338624
F9	2	55320.3	331808
F10	2	62787.2	333374
F11	2	61954.8	335950
F12	2	76641.1	321918
G1	2	82248.5	318122
G2	2	75547.8	315490
G3	2	50862.7	309251
G4	2	52983.9	315951
G5	2	56799.4	341087
G6	2	59223.1	331007
G7	2	57443.4	305282
G8	2	55212.7	350392
G9	2	57237.3	336425
G10	2	57887.3	322281
G11	2	89382.4	333999
G12	2	78842.4	330830
H1	2	85176.7	305584
H2	2	87682.9	314148
H3	2	58321.3	324647
H4	2	57690.3	314803
H5	2	63436.9	344971
H6	2	61320.2	320432
H7	2
H8	2
H9	2
H10	2
H11	2
H12	2
A1	3	114105	298744
A2	3	106321	341596
A3	3	73277.1	333246
A4	3	62614.3	328107
A5	3	57478.7	333794
A6	3	67480.6	347339
A7	3	57065.3	336813
A8	3	64173.9	344521
A9	3	66827.5	325896
A10	3	66195.9	300471
A11	3	74210.5	307561
A12	3	73786.7	263040
B1	3	99903.3	297003
B2	3	72197.9	333158
B3	3	60742.9	309629
B4	3	56758.3	316949
B5	3	58579.6	303618
B6	3	56355.1	317099
B7	3	56252.4	334095
B8	3	60706.4	349610
B9	3	57512.3	338850
B10	3	54640.2	325710
B11	3	58767.6	304881
B12	3	59293.6	272319
C1	3	111181	327161
C2	3	68184.9	314331
C3	3	56324.8	311328
C4	3	58316.9	314776
C5	3	54822.9	325466
C6	3	53021.6	307548
C7	3	177135	339575
C8	3	57092.9	326531
C9	3	57764.5	345855
C10	3	54736.5	327650
C11	3	57524.3	336242
C12	3	60952.3	301252
D1	3	61178.6	326489
D2	3	65920.6	313842
D3	3	56555.8	314612
D4	3	63933.4	308257
D5	3	57686.3	327246
D6	3	53860.5	328698
D7	3	55783.7	338607
D8	3	54744.7	343189
D9	3	63698.1	335920
D10	3	90449.1	340740
D11	3	59908.9	316682
D12	3	66587.7	321745
E1	3	84945.2	319724
E2	3	64942.2	304530
E3	3	62320.5	306858
E4	3	61317.8	313675
E5	3	63357.5	335008
E6	3	52709.9	337898
E7	3	57315.4	352877
E8	3	54738.1	341021
E9	3	54447.2	337090
E10	3	57913.8	333760
E11	3	69786.4	343212
E12	3	80336.2	318825
F1	3	66376.1	311689
F2	3	59827.1	306254
F3	3	52674.8	308455
F4	3	60183.8	314308
F5	3	66240.2	330358
F6	3	63137.4	334491
F7	3	55722.6	344472
F8	3	60811.5	341366
F9	3	55687.5	336054
F10	3	63909.2	335790
F11	3	62475.8	337897
F12	3	77549.3	322914
G1	3	83126.3	322433
G2	3	75858.4	319710
G3	3	51345.3	311252
G4	3	53316.4	319458
G5	3	57757.6	345257
G6	3	60187	334087
G7	3	58320.3	308928
G8	3	55828.8	353446
G9	3	58096.6	338936
G10	3	58699.9	324935
G11	3	90394	335871
G12	3	78881.5	333318
H1	3	85103.5	311053
H2	3	88890.8	318706
H3	3	59055.1	329333
H4	3	58645.9	318722
H5	3	64507.4	349404
H6	3	62002	325307
H7	3
H8	3
H9	3
H10	3
H11	3
H12	3
A1	4	116228	300459
A2	4	107162	344523
A3	4	73214.8	335354
A4	4	62796.5	332221
A5	4	57659.7	336507
A6	4	68454.1	350326
A7	4	57701.4	339722
A8	4	64869.4	347850
A9	4	67116.6	328849
A10	4	66448.7	303297
A11	4	75058.5	308976
A12	4	73739.3	264784
B1	4	101434	298695
B2	4	72910.9	335198
B3	4	61211.9	310676
B4	4	56861.7	318522
B5	4	59187.4	304581
B6	4	56617.8	318643
B7	4	57091	336572
B8	4	61378	351990
B9	4	58165.5	342875
B10	4	55379.2	327604
B11	4	59195	307269
B12	4	59390.2	273216
C1	4	112593	329108
C2	4	68280.1	316931
C3	4	56480.1	312372
C4	4	58683.8	317052
C5	4	54945.2	326732
C6	4	53536.9	309051
C7	4	178264	341716
C8	4	57919.3	328061
C9	4	58088.4	348676
C10	4	54947.4	329449
C11	4	57942.3	337395
C12	4	61766.7	301990
D1	4	61284.4	328609
D2	4	66415.8	315012
D3	4	57643.9	315639
D4	4	64551.1	310913
D5	4	58541.1	329266
D6	4	54653.6	329921
D7	4	56379.6	341221
D8	4	54860.7	344632
D9	4	64474	337512
D10	4	90972.2	342813
D11	4	60758.8	318482
D12	4	66148.9	323148
E1	4	85121	322239
E2	4	65228.2	305264
E3	4	62888	308123
E4	4	62055.7	315838
E5	4	63897.6	336476
E6	4	53332	339510
E7	4	58076	355908
E8	4	55038.2	341947
E9	4	55321.9	338480
E10	4	58501.3	334457
E11	4	69957.9	344669
E12	4	80731.2	320321
F1	4	66966.4	314013
F2	4	59922.8	308328
F3	4	52941.8	310212
F4	4	60895.2	317618
F5	4	67099	332212
F6	4	63499.5	336175
F7	4	56269.1	346298
F8	4	61282.1	343436
F9	4	56584.6	337489
F10	4	65003.1	336951
F11	4	63622.1	340191
F12	4	77692.6	325405
G1	4	84369.8	326183
G2	4	75921.8	321185
G3	4	51712.4	312570
G4	4	53834.7	322261
G5	4	58589	347512
G6	4	61088.8	336025
G7	4	59027.5	310395
G8	4	56526.3	354094
G9	4	59106.7	340947
G10	4	59361.8	327849
G11	4	91642.2	337213
G12	4	80140.2	334386
H1	4	87184.7	314358
H2	4	90121.4	321034
H3	4	59600.6	331698
H4	4	58539.9	320653
H5	4	65034.5	352191
H6	4	62762.2	327331
H7	4
H8	4
H9	4
H10	4
H11	4
H12	4
A1	5	117132	301358
A2	5	107534	345848
A3	5	73860.5	337098
A4	5	62702.6	334334
A5	5	57609.6	337533
A6	5	69017	351562
A7	5	58247.5	341578
A8	5	64783.5	349157
A9	5	67459.5	330258
A10	5	66546.4	304960
A11	5	74945.2	309139
A12	5	73767.6	265518
B1	5	102477	300253
B2	5	73374.4	336498
B3	5	61248.2	311011
B4	5	56921.9	319803
B5	5	59756.6	305446
B6	5	56967.9	319235
B7	5	57003.1	337820
B8	5	61702.8	352119
B9	5	58339.5	344767
B10	5	55298.8	328749
B11	5	59419.3	308061
B12	5	59573.2	273406
C1	5	114087	331076
C2	5	69427	318331
C3	5	56833.4	312361
C4	5	59124	317528
C5	5	55532.2	328158
C6	5	53879.2	309436
C7	5	178302	342389
C8	5	57803.7	328933
C9	5	58266.2	349605
C10	5	55199.9	329345
C11	5	58013.7	338991
C12	5	61339.9	302802
D1	5	61341.5	330338
D2	5	66386.5	316022
D3	5	57208.6	315718
D4	5	64821.4	312474
D5	5	58753.7	330854
D6	5	54767.5	329693
D7	5	56951.9	342096
D8	5	55142	343148
D9	5	64963.9	338497
D10	5	92137	344540
D11	5	61025.6	318910
D12	5	66180.8	320075
E1	5	85979	323564
E2	5	65794.6	305134
E3	5	63100.2	309402
E4	5	62255.3	316909
E5	5	64460.8	337738
E6	5	53474.9	339694
E7	5	57969.5	356166
E8	5	55429.5	343123
E9	5	55372.4	339786
E10	5	58537.3	335220
E11	5	70720.5	345980
E12	5	80596.1	320001
F1	5	67738.8	315687
F2	5	60079.4	309844
F3	5	53058.2	311018
F4	5	61018.2	319127
F5	5	67157.7	333197
F6	5	64393.8	338054
F7	5	56558.3	347668
F8	5	61306.5	344949
F9	5	56503.3	338581
F10	5	65185.1	337649
F11	5	63577.9	340006
F12	5	78816.1	326305
G1	5	85199	327795
G2	5	76334.2	322766
G3	5	52145.8	313245
G4	5	54379.5	324107
G5	5	58940.2	350303
G6	5	61343.9	336818
G7	5	59797.2	311481
G8	5	57184.8	355147
G9	5	59187.3	342138
G10	5	60345.4	328849
G11	5	92578.9	337718
G12	5	80596.4	333725
H1	5	87660.2	315877
H2	5	90831.1	323090
H3	5	59665.4	329211
H4	5	58658.5	321637
H5	5	65359.2	353496
H6	5	63664.3	329402
H7	5
H8	5
H9	5
H10	5
H11	5
H12	5
A1	6	118389	302788
A2	6	108398	347189
A3	6	73767.3	338442
A4	6	63212.5	336955
A5	6	58330.7	339580
A6	6	69596.5	353455
A7	6	58523.1	343248
A8	6	65259.1	351268
A9	6	67705.6	331351
A10	6	67177.5	306758
A11	6	75037.7	310397
A12	6	74369.5	266664
B1	6	102998	301240
B2	6	74246	338022
B3	6	61691.5	312225
B4	6	57539.4	320504
B5	6	60220.4	307223
B6	6	57343	319856
B7	6	57611.8	339135
B8	6	62270.7	353569
B9	6	59298.4	346809
B10	6	55687.7	329200
B11	6	59982.2	308701
B12	6	59569	274031
C1	6	115018	332481
C2	6	69865.5	319515
C3	6	57115.1	313254
C4	6	59709.8	319394
C5	6	55734.9	329030
C6	6	54172.8	310193
C7	6	179220	344027
C8	6	58101.8	329711
C9	6	58833.5	350531
C10	6	56021.5	330549
C11	6	58495	339797
C12	6	61996.5	303619
D1	6	62004	332389
D2	6	66881.3	317571
D3	6	57756.9	316366
D4	6	65833.5	313257
D5	6	59439.9	331180
D6	6	55066.9	330097
D7	6	57042.1	342922
D8	6	55661.6	343464
D9	6	65338.9	339394
D10	6	93622.1	345915
D11	6	61525.8	319593
D12	6	66753.6	321045
E1	6	86628.8	325305
E2	6	66308.7	305538
E3	6	63862.3	311062
E4	6	63310.8	319266
E5	6	65192.4	339023
E6	6	53788.9	339888
E7	6	58591	357541
E8	6	55829.4	344978
E9	6	55636.8	340601
E10	6	59302.7	336305
E11	6	71146.4	346327
E12	6	80748.9	320824
F1	6	67728.4	317638
F2	6	60828	311261
F3	6	53607	312717
F4	6	61338.7	320887
F5	6	68281.7	334937
F6	6	64629	339021
F7	6	57294.9	348515
F8	6	62195.9	345693
F9	6	57142.3	339554
F10	6	65366.5	338164
F11	6	64011.2	341192
F12	6	79054.3	326269
G1	6	85794.9	329727
G2	6	76733.9	324950
G3	6	52236.3	314443
G4	6	55405.3	325924
G5	6	59783.3	352661
G6	6	62162.7	337807
G7	6	60032.4	313133
G8	6	57753.7	352834
G9	6	60140.1	344355
G10	6	60554.7	330131
G11	6	93415.3	338153
G12	6	80784.5	334343
H1	6	89075.9	317529
H2	6	91567.1	325046
H3	6	60139.8	331262
H4	6	59664.6	323358
H5	6	66249.1	355358
H6	6	63770.7	331139
H7	6
H8	6
H9	6
H10	6
H11	6
H12	6
A1	7	119878	303729
A2	7	109337	348298
A3	7	74373	339126
A4	7	63588.2	338712
A5	7	58385.7	340434
A6	7	69854.4	355236
A7	7	58787	345016
A8	7	65788.3	352804
A9	7	67808.2	332535
A10	7	68094.5	308375
A11	7	74834.8	311858
A12	7	73892.5	263343
B1	7	104225	301428
B2	7	74597.6	338852
B3	7	62105.2	313073
B4	7	57681.7	322912
B5	7	60780.9	306949
B6	7	57845.5	320410
B7	7	58095.2	340867
B8	7	62096.3	354862
B9	7	59147	348442
B10	7	56066.5	330646
B11	7	60438.7	309783
B12	7	60177.2	274603
C1	7	115763	332581
C2	7	70400.7	321509
C3	7	57358.2	314349
C4	7	60381.9	320054
C5	7	56122.2	329747
C6	7	54799.7	310430
C7	7	180244	344722
C8	7	58660.5	330405
C9	7	59211.7	351972
C10	7	56333.1	330527
C11	7	58962.1	340162
C12	7	62107	302163
D1	7	62750.2	333672
D2	7	68177.6	318978
D3	7	58055.2	316701
D4	7	66109.9	314576
D5	7	59637.2	332636
D6	7	55435.3	329748
D7	7	57719.9	343946
D8	7	56127.1	345388
D9	7	65597.6	340833
D10	7	93940.4	347422
D11	7	62012.3	320343
D12	7	67682.7	322061
E1	7	87254.3	326142
E2	7	66902.7	306289
E3	7	64092	312070
E4	7	63679.3	320135
E5	7	65778.5	340562
E6	7	54196.6	340549
E7	7	58933.9	358071
E8	7	56154.2	345846
E9	7	55980.1	341584
E10	7	59657.9	336791
E11	7	71777.4	347494
E12	7	81132.6	321004
F1	7	68529.8	319556
F2	7	61059.3	312707
F3	7	54109.3	313615
F4	7	61924.6	321958
F5	7	67826.1	335867
F6	7	65274.4	340303
F7	7	56790.5	349512
F8	7	62197.6	346701
F9	7	57108.5	340108
F10	7	65490.4	337880
F11	7	64832.2	341396
F12	7	79217.1	327453
G1	7	87276.6	331042
G2	7	76956.4	325607
G3	7	52524.9	314877
G4	7	55981.7	327707
G5	7	60408	354501
G6	7	62526.2	338011
G7	7	61119.6	314459
G8	7	58454.2	354696
G9	7	60564.6	345271
G10	7	61191.3	331568
G11	7	93873.6	337127
G12	7	81599.6	335088
H1	7	88964.2	318426
H2	7	91785.3	326631
H3	7	60341.4	333004
H4	7	60021.5	324598
H5	7	66939.7	357031
H6	7	64557.2	332758
H7	7
H8	7
H9	7
H10	7
H11	7
H12	7
A1	8	120623	304648
A2	8	109914	348913
A3	8	74352.5	339490
A4	8	63789.2	339578
A5	8	58854.7	341356
A6	8	70299.6	354808
A7	8	59274.6	345939
A8	8	65728	353631
A9	8	68109	332886
A10	8	67752.5	309462
A11	8	75390.8	311680
A12	8	73975.5	263896
B1	8	104741	301797
B2	8	74904.1	339830
B3	8	61804	312829
B4	8	58058.4	322190
B5	8	60817.9	307302
B6	8	57807.7	320610
B7	8	58049	341008
B8	8	62374.5	356207
B9	8	59605	348900
B10	8	55924	330152
B11	8	60505.6	309513
B12	8	60674.7	274518
C1	8	116816	334088
C2	8	70528.7	322843
C3	8	57420.1	314730
C4	8	60309.4	320230
C5	8	55994.7	329781
C6	8	54589	310240
C7	8	180716	344787
C8	8	59112.4	330745
C9	8	59319.5	352393
C10	8	56501.3	330474
C11	8	59133.8	339740
C12	8	62612.2	301793
D1	8	62520.2	334560
D2	8	68172.1	320619
D3	8	57939	316673
D4	8	66273.1	315194
D5	8	60105.4	332725
D6	8	55370.1	329410
D7	8	58039.9	343037
D8	8	56391.2	345672
D9	8	65559.3	340575
D10	8	95109	349021
D11	8	62100.5	319864
D12	8	67586.2	322411
E1	8	87416.9	327926
E2	8	67262.4	306322
E3	8	64521.9	313566
E4	8	64129.8	320408
E5	8	66060.2	341229
E6	8	54340.9	339877
E7	8	58945.1	357912
E8	8	56091.6	345510
E9	8	56116.1	340880
E10	8	59628.2	336380
E11	8	71724.8	346641
E12	8	80901.4	320715
F1	8	68558	321440
F2	8	61023.2	313823
F3	8	54199.7	314686
F4	8	61921.7	322939
F5	8	68719.6	336008
F6	8	65194	341377
F7	8	56971.7	346741
F8	8	62570.7	346532
F9	8	57453.2	339942
F10	8	65830.4	337971
F11	8	64662.2	341081
F12	8	79443.5	326557
G1	8	88472.3	332623
G2	8	76565.3	327108
G3	8	52658.1	315682
G4	8	56077.3	328893
G5	8	60868.9	355634
G6	8	63378.1	337614
G7	8	61611.1	315690
G8	8	58890.7	355685
G9	8	61258.5	346503
G10	8	62045.1	331157
G11	8	95107	335971
G12	8	81586.8	334829
H1	8	91118.1	320006
H2	8	92444	328094
H3	8	61214.1	334673
H4	8	61056.7	325639
H5	8	67309.6	358243
H6	8	65364	333898
H7	8
H8	8
H9	8
H10	8
H11	8
H12	8
A1	9	121848	305363
A2	9	110543	349431
A3	9	74445.7	340504
A4	9	63935.4	340846
A5	9	59047.8	342436
A6	9	70606.2	355561
A7	9	59266	347217
A8	9	66096.6	354297
A9	9	68602.7	333516
A10	9	68332.4	311105
A11	9	76207.1	312467
A12	9	74589.7	264900
B1	9	105171	302506
B2	9	75314.5	340234
B3	9	62510.8	313412
B4	9	58410.2	323314
B5	9	61178.7	308362
B6	9	58123.6	321068
B7	9	58350.2	342068
B8	9	62838.2	357179
B9	9	59970.1	349640
B10	9	56079.1	330688
B11	9	60768.1	310153
B12	9	60810.1	274463
C1	9	118520	334456
C2	9	71293.7	324231
C3	9	57941.9	315303
C4	9	60567.3	320719
C5	9	56333.3	329793
C6	9	54894.3	310096
C7	9	181354	345144
C8	9	59074.8	331056
C9	9	59366.6	352660
C10	9	56781.1	330189
C11	9	59667.6	340085
C12	9	62208	301896
D1	9	63466.6	336063
D2	9	68733.7	321362
D3	9	58095.9	317371
D4	9	66660.7	315927
D5	9	60353.2	333216
D6	9	55652	329057
D7	9	57460.1	343348
D8	9	56573.1	346465
D9	9	66141	341063
D10	9	96706.7	349926
D11	9	62556.3	320425
D12	9	67366.7	322588
E1	9	88171	328478
E2	9	67578.3	306155
E3	9	64712.9	314784
E4	9	64612.4	320871
E5	9	66415	341409
E6	9	54781.9	339409
E7	9	59284.9	358434
E8	9	56317.1	345314
E9	9	56819.3	341860
E10	9	59936.3	336186
E11	9	72423.8	346659
E12	9	81246.2	320730
F1	9	69195.2	322754
F2	9	61348.9	314561
F3	9	53937.4	315636
F4	9	62727.2	323753
F5	9	69311.3	336844
F6	9	65652.2	341973
F7	9	57262.1	347315
F8	9	62834.2	345917
F9	9	58173.8	340186
F10	9	66030.6	337605
F11	9	65363.4	341067
F12	9	80629.1	327119
G1	9	88695.1	333825
G2	9	77069.5	328874
G3	9	52724.2	316678
G4	9	57319.2	330628
G5	9	61433.2	357535
G6	9	64527.4	338022
G7	9	62787	316472
G8	9	60493.4	355282
G9	9	62913.1	348397
G10	9	63462.8	332310
G11	9	96411.6	336105
G12	9	83335.2	335194
H1	9	92360.9	320753
H2	9	93594	329622
H3	9	62094.8	336438
H4	9	61683.4	327153
H5	9	68497.6	358952
H6	9	66604.5	335011
H7	9
H8	9
H9	9
H10	9
H11	9
H12	9
A1	10	122940	305367
A2	10	111448	350195
A3	10	74846.4	341869
A4	10	64347.2	342326
A5	10	59085.4	344447
A6	10	71283.5	357341
A7	10	59632.4	348501
A8	10	66301	355772
A9	10	68539.2	335291
A10	10	68516.1	311847
A11	10	76086.3	313484
A12	10	74890.6	266380
B1	10	105971	303309
B2	10	76193.4	341029
B3	10	62986.4	313863
B4	10	58540	324322
B5	10	61539.2	309971
B6	10	58608.3	321659
B7	10	58722.2	342870
B8	10	62848.9	358631
B9	10	60237.1	350918
B10	10	56394.4	331240
B11	10	61153.1	310714
B12	10	60967.6	275975
C1	10	119363	335314
C2	10	71951.3	326171
C3	10	58199.1	316562
C4	10	60955.5	321810
C5	10	56839	330870
C6	10	54883.6	310656
C7	10	181415	345951
C8	10	59165.4	332486
C9	10	60119.6	353578
C10	10	57243.6	330976
C11	10	59386.7	340873
C12	10	62717.5	302883
D1	10	63199.3	336797
D2	10	68966.2	323064
D3	10	58816.2	318400
D4	10	67396.1	317561
D5	10	60559.6	334070
D6	10	56021.3	329198
D7	10	58228.4	343786
D8	10	57084.7	347740
D9	10	66479	342023
D10	10	97344.3	351902
D11	10	62719	321150
D12	10	67617.9	322992
E1	10	88649.7	330293
E2	10	67843.6	306442
E3	10	65416.3	316041
E4	10	64550	322731
E5	10	66817.3	343123
E6	10	55059.2	339953
E7	10	59215.3	359357
E8	10	56841.4	346114
E9	10	56821.1	341408
E10	10	60035.5	336802
E11	10	72206.6	347648
E12	10	81599.2	320811
F1	10	69569.3	324293
F2	10	61265.7	316064
F3	10	54268.3	316893
F4	10	62358.8	324260
F5	10	69314.3	338131
F6	10	66040	343522
F7	10	57759.8	343542
F8	10	62797.1	346943
F9	10	58380.1	340480
F10	10	66630.3	337747
F11	10	65625.2	342014
F12	10	80260.8	327938
G1	10	89406.8	335355
G2	10	77136.3	329976
G3	10	52993.4	317722
G4	10	59610.8	331986
G5	10	63769	358603
G6	10	66310.8	338985
G7	10	65677.1	317862
G8	10	63067.4	356999
G9	10	65818.9	350554
G10	10	65377.9	333253
G11	10	98478	336451
G12	10	85847.7	335519
H1	10	93408	322147
H2	10	95130.3	330149
H3	10	64179.5	337745
H4	10	63604	328591
H5	10	70202.8	360956
H6	10	68094.7	337018
H7	10
H8	10
H9	10
H10	10
H11	10
H12	10
A1	11	123428	306292
A2	11	111769	350381
A3	11	74868	341599
A4	11	64588.6	343637
A5	11	59574.7	344977
A6	11	71428	357759
A7	11	59936.2	349313
A8	11	66723.9	356507
A9	11	68773.1	335568
A10	11	68538.3	312930
A11	11	78413.2	314654
A12	11	75018.6	266825
B1	11	106367	303993
B2	11	76124.2	341181
B3	11	62962.3	314347
B4	11	58933.3	324523
B5	11	61903.6	310589
B6	11	58509.3	322020
B7	11	58685.1	343225
B8	11	63026.6	359464
B9	11	60431.2	350989
B10	11	56551.3	331220
B11	11	61448.9	310311
B12	11	61052.5	275774
C1	11	120273	336357
C2	11	71770	327618
C3	11	58433.2	318170
C4	11	60759	321473
C5	11	57001.6	331039
C6	11	55227.2	310473
C7	11	181814	345788
C8	11	59847.2	332364
C9	11	59932.9	353617
C10	11	57001	330566
C11	11	60164.2	340057
C12	11	63131.1	302356
D1	11	63871	337845
D2	11	69638.5	323840
D3	11	58463.8	318439
D4	11	66784.4	317205
D5	11	60397.5	333831
D6	11	55923.1	328605
D7	11	58043.1	343625
D8	11	56926.3	347514
D9	11	67016.6	342330
D10	11	97765.4	352488
D11	11	63147.3	320888
D12	11	68249.7	323610
E1	11	89084.9	330523
E2	11	67752.7	306608
E3	11	65231.6	316596
E4	11	64699.6	322762
E5	11	67146.2	343937
E6	11	55078.4	340322
E7	11	59547.5	358839
E8	11	56577.7	346347
E9	11	56906.7	341724
E10	11	60089	336294
E11	11	72624.9	347303
E12	11	81815.5	320470
F1	11	70059	325123
F2	11	61608.2	316274
F3	11	54178.1	316521
F4	11	62620.3	324078
F5	11	69927.3	339555
F6	11	66339.7	344231
F7	11	57822.8	344314
F8	11	63200.6	346240
F9	11	58241.9	340659
F10	11	66804.7	337402
F11	11	65729.5	341380
F12	11	80777.9	327475
G1	11	90244.5	336475
G2	11	76866	331138
G3	11	53039.3	318704
G4	11	62046.6	333001
G5	11	66727.9	359181
G6	11	69447.9	338188
G7	11	69539.4	318268
G8	11	67577.8	357141
G9	11	70062.4	351792
G10	11	68888.8	333144
G11	11	102169	336469
G12	11	88610.5	335007
H1	11	95975.6	322413
H2	11	97896.2	331216
H3	11	67018.6	334996
H4	11	65993.2	329956
H5	11	73215.6	362181
H6	11	71073.1	337525
H7	11
H8	11
H9	11
H10	11
H11	11
H12	11
A1	12	123631	306211
A2	12	112245	351347
A3	12	75745.7	342428
A4	12	64556.3	343836
A5	12	59588.8	345772
A6	12	71565.7	358538
A7	12	60273.8	349652
A8	12	66438.6	356579
A9	12	69237.5	336261
A10	12	68997.8	313309
A11	12	76564.5	314757
A12	12	75060.2	267264
B1	12	106543	303650
B2	12	76409.2	341857
B3	12	62798.4	314637
B4	12	58874	324782
B5	12	62194.2	311042
B6	12	58406.1	322478
B7	12	58575	343352
B8	12	63293.8	359706
B9	12	60511.9	350770
B10	12	56475.5	330400
B11	12	61384.2	310928
B12	12	61374.4	275534
C1	12	121675	336903
C2	12	72367.4	328652
C3	12	58832.8	318084
C4	12	61104.2	321481
C5	12	56614.8	330898
C6	12	55231.5	310114
C7	12	181484	345892
C8	12	59824.4	332776
C9	12	60088.9	346728
C10	12	57262.3	329933
C11	12	59940	339866
C12	12	62951.2	302840
D1	12	63294.3	338615
D2	12	69555.7	324650
D3	12	59195.6	319391
D4	12	67599.2	318020
D5	12	60694.8	334141
D6	12	56395.2	328416
D7	12	58010.3	343412
D8	12	57082.8	343739
D9	12	66797.8	341897
D10	12	99061.9	352929
D11	12	63308.1	321182
D12	12	68356.4	323207
E1	12	89397.5	331938
E2	12	68280.7	307208
E3	12	65677.8	317896
E4	12	64984.4	322751
E5	12	67510.1	344974
E6	12	55102.7	340520
E7	12	59679.6	358552
E8	12	56780.6	345983
E9	12	56690.6	341765
E10	12	60189.5	335860
E11	12	72390.9	346431
E12	12	81788.1	319680
F1	12	70342	326269
F2	12	61751.1	316892
F3	12	54444.3	317241
F4	12	62668.5	324539
F5	12	69765.5	339612
F6	12	66559	344565
F7	12	57777	345395
F8	12	62955.2	345859
F9	12	58686.2	340203
F10	12	66926.8	336743
F11	12	65548.4	341799
F12	12	80932.2	327541
G1	12	90825.6	337374
G2	12	77251.9	331429
G3	12	53600.7	319160
G4	12	68589.1	333607
G5	12	73332	359576
G6	12	75485	338351
G7	12	77872.2	318680
G8	12	75985.5	357045
G9	12	79096	353293
G10	12	75715.1	333483
G11	12	108893	336224
G12	12	95803.6	334804
H1	12	102062	324055
H2	12	102374	327826
H3	12	73052.9	335823
H4	12	70963	330510
H5	12	79021.5	363202
H6	12	76111.9	339244
H7	12
H8	12
H9	12
H10	12
H11	12
H12	12
A1	13	124915	306905
A2	13	112660	351953
A3	13	75991.7	343274
A4	13	64564.8	345380
A5	13	59980.1	347238
A6	13	71815.7	359840
A7	13	60258.1	351032
A8	13	66907.6	357922
A9	13	69294.1	337076
A10	13	69349.6	314610
A11	13	76587.3	316575
A12	13	75564.8	268238
B1	13	107354	304449
B2	13	77260.2	342115
B3	13	63558.9	315231
B4	13	59220.9	325234
B5	13	62747.9	312240
B6	13	58884	323392
B7	13	58899.4	344382
B8	13	63684	360690
B9	13	60769.4	351537
B10	13	56844.4	331190
B11	13	61982.2	310866
B12	13	61456.6	276098
C1	13	122455	338766
C2	13	72417.4	330346
C3	13	59038.1	319918
C4	13	61383.2	321988
C5	13	57303.5	331243
C6	13	55444.1	310896
C7	13	181403	346350
C8	13	60211.9	333880
C9	13	60241.6	348149
C10	13	57486.2	330511
C11	13	60300.5	340278
C12	13	63569.5	303220
D1	13	63534.1	339417
D2	13	70272.2	326735
D3	13	59508	320725
D4	13	67684.7	318699
D5	13	60902.4	335244
D6	13	56345.7	329026
D7	13	58707.6	344006
D8	13	57193.6	345241
D9	13	67086.9	343202
D10	13	99104.7	354688
D11	13	63848	321596
D12	13	68202	323769
E1	13	89545.4	332584
E2	13	68464.9	308317
E3	13	66276.3	318629
E4	13	65292.8	323825
E5	13	67503.8	345662
E6	13	55414.7	340893
E7	13	59879.9	359142
E8	13	57028.5	346296
E9	13	57514.9	341710
E10	13	60755.2	336209
E11	13	72622.9	346889
E12	13	82127.8	320770
F1	13	70943.9	327023
F2	13	61528.8	318121
F3	13	54882.1	317649
F4	13	63192.8	325118
F5	13	70407.3	341258
F6	13	66557.2	345492
F7	13	58279.5	343250
F8	13	63418.7	346981
F9	13	58701.6	340620
F10	13	67233.3	337239
F11	13	66342.4	342189
F12	13	81060.6	328073
G1	13	91436.8	338154
G2	13	77346.1	332436
G3	13	53775.5	319745
G4	13	79882.1	334278
G5	13	85403.5	360456
G6	13	86662.8	338795
G7	13	92126.5	319869
G8	13	92074.8	358063
G9	13	95094.8	354406
G10	13	88566.4	333830
G11	13	122036	336225
G12	13	108374	335072
H1	13	111278	324186
H2	13	112307	328150
H3	13	84875.2	336684
H4	13	80793.3	331874
H5	13	89524.7	364438
H6	13	86000.8	340261
H7	13
H8	13
H9	13
H10	13
H11	13
H12	13
A1	14	125826	306512
A2	14	112733	351864
A3	14	75577.4	343297
A4	14	64733	345492
A5	14	59919.5	348267
A6	14	71992.8	360262
A7	14	60382.5	351696
A8	14	67138.2	358641
A9	14	69346.1	337841
A10	14	69178.8	314582
A11	14	76878.5	317015
A12	14	75734.1	269114
B1	14	107606	304643
B2	14	77378.4	342841
B3	14	63951.9	315338
B4	14	59153.9	325506
B5	14	62390.6	312685
B6	14	59088	324033
B7	14	59123.8	344434
B8	14	63686.6	360857
B9	14	60767.7	351777
B10	14	57027.5	330816
B11	14	61924	311213
B12	14	61807.5	276496
C1	14	123783	339801
C2	14	73340.5	330792
C3	14	59342.7	320755
C4	14	61485.4	321805
C5	14	57355.5	330790
C6	14	55939	310997
C7	14	181202	345890
C8	14	60311.7	333584
C9	14	60413.1	348667
C10	14	57700.4	330825
C11	14	60632.2	340558
C12	14	63608.1	303020
D1	14	64028.4	340033
D2	14	70530.6	327036
D3	14	59068	321619
D4	14	67850.7	319474
D5	14	60726.7	335572
D6	14	56195.3	329292
D7	14	58652.1	344025
D8	14	57802.5	346163
D9	14	67342.2	343385
D10	14	99711.7	355051
D11	14	63515.4	321885
D12	14	69210.5	323801
E1	14	90343	333274
E2	14	69432.8	309702
E3	14	66144.2	319167
E4	14	65354.6	323994
E5	14	67533.5	346627
E6	14	55076.4	341142
E7	14	60022.4	359315
E8	14	57028	346420
E9	14	57287.6	342013
E10	14	60937.9	336403
E11	14	73003.1	347180
E12	14	82304.9	320866
F1	14	70743.5	327210
F2	14	61908.2	318596
F3	14	54903.8	318968
F4	14	63121.8	324684
F5	14	70644.3	342083
F6	14	66890.4	346301
F7	14	58375.3	344484
F8	14	63373.3	346161
F9	14	58959.3	340505
F10	14	67545.5	337616
F11	14	66427.4	342455
F12	14	81724.3	328064
G1	14	91916.9	338470
G2	14	77499.3	333062
G3	14	53410.9	320764
G4	14	100032	334905
G5	14	106680	360862
G6	14	107039	338945
G7	14	117432	320424
G8	14	120327	358285
G9	14	123211	354140
G10	14	110636	333895
G11	14	144057	336344
G12	14	131264	334592
H1	14	127511	324172
H2	14	126670	329232
H3	14	105376	338022
H4	14	97946.8	332719
H5	14	108422	365164
H6	14	103919	340788
H7	14
H8	14
H9	14
H10	14
H11	14
H12	14
A1	15	126852	307547
A2	15	113019	352056
A3	15	76031.2	343274
A4	15	64807.1	346225
A5	15	60085.9	348369
A6	15	72145	360633
A7	15	60411.6	351679
A8	15	66846.6	358516
A9	15	69169.7	333928
A10	15	69292.5	314640
A11	15	77639.5	317314
A12	15	76054.4	269263
B1	15	108407	304893
B2	15	78056	342933
B3	15	64184.7	315865
B4	15	59048.3	325006
B5	15	62700.8	313702
B6	15	58927.8	324359
B7	15	59507.1	344183
B8	15	63918.8	360558
B9	15	61283.8	351252
B10	15	56612.4	329897
B11	15	61636.7	310660
B12	15	62114.5	275914
C1	15	124851	341175
C2	15	73433.9	331030
C3	15	59661.2	321177
C4	15	61923.4	321740
C5	15	57064.3	330118
C6	15	55599.6	310770
C7	15	180823	345366
C8	15	60336.5	333063
C9	15	60743.1	348697
C10	15	57703.2	329930
C11	15	61017.3	340233
C12	15	63129.9	302950
D1	15	64688.7	340535
D2	15	70977.4	326783
D3	15	59630.3	322068
D4	15	67922.3	319578
D5	15	60934	334902
D6	15	56246.3	328645
D7	15	58941.3	343413
D8	15	57397.8	346156
D9	15	67576.9	342358
D10	15	100214	354399
D11	15	63763.7	322209
D12	15	68505	322736
E1	15	90630.9	333826
E2	15	69510.8	310207
E3	15	66993.8	319519
E4	15	65213.6	324121
E5	15	67909.1	346955
E6	15	55345.5	340772
E7	15	60260.2	358827
E8	15	57261.3	345955
E9	15	57505.5	341471
E10	15	60428	336235
E11	15	73017.9	346768
E12	15	82421.6	320537
F1	15	70647.8	328436
F2	15	62373.1	319053
F3	15	54825	318495
F4	15	63044.1	324895
F5	15	70871.3	342427
F6	15	66862.1	346443
F7	15	58534.8	344573
F8	15	63461.1	345558
F9	15	58665.3	339831
F10	15	67191.1	337054
F11	15	66266.6	342245
F12	15	81325.3	326139
G1	15	92010.1	338835
G2	15	77549.3	332893
G3	15	53651.1	321146
G4	15	134010	335309
G5	15	143200	361273
G6	15	141513	339184
G7	15	158612	319949
G8	15	165114	357771
G9	15	168794	353924
G10	15	148196	333797
G11	15	181847	336584
G12	15	168797	334812
H1	15	153617	324409
H2	15	162059	330038
H3	15	140229	338871
H4	15	127868	333098
H5	15	141493	366308
H6	15	134440	341737
H7	15
H8	15
H9	15
H10	15
H11	15
H12	15
A1	16	126568	308084
A2	16	113806	352577
A3	16	76599.5	343868
A4	16	65151.3	346595
A5	16	60627	349731
A6	16	72198.9	361641
A7	16	60705.2	352181
A8	16	67287.2	358779
A9	16	69657	334755
A10	16	69378.3	314988
A11	16	77620	318164
A12	16	76031	268750
B1	16	109707	305049
B2	16	78820.7	343147
B3	16	64828.4	315962
B4	16	59232.8	325137
B5	16	63196.3	314072
B6	16	59432.1	324304
B7	16	60213.9	344272
B8	16	64210.9	360792
B9	16	61541.3	351706
B10	16	57162.4	330620
B11	16	62137.8	310565
B12	16	62008.8	276161
C1	16	126474	341681
C2	16	75199.5	332669
C3	16	60238.1	321771
C4	16	61742.1	321563
C5	16	57287.4	329652
C6	16	55827.6	310805
C7	16	181239	345526
C8	16	61060.9	333477
C9	16	61464.3	349147
C10	16	57949.7	329666
C11	16	60822.1	340068
C12	16	63506.1	303433
D1	16	65465.4	340769
D2	16	71983.2	327648
D3	16	60906.3	321845
D4	16	68106.3	320111
D5	16	61036.3	335809
D6	16	56626.3	328905
D7	16	59617.2	343192
D8	16	58317.1	346539
D9	16	67945.2	342370
D10	16	100280	354826
D11	16	63546.9	321809
D12	16	68842.8	323029
E1	16	91890.9	334835
E2	16	70110.8	311880
E3	16	67929.3	320382
E4	16	65581.3	324730
E5	16	68316.9	347699
E6	16	55571.8	340964
E7	16	60642.8	359044
E8	16	57808.1	346076
E9	16	58027.6	340937
E10	16	61251.6	336312
E11	16	73101.3	346496
E12	16	82545.6	321203
F1	16	71266.6	329121
F2	16	62437.5	319045
F3	16	54944.7	319553
F4	16	63124.4	325673
F5	16	71228.2	343602
F6	16	67148.6	347125
F7	16	58578.3	345138
F8	16	63752.1	345354
F9	16	58633	339578
F10	16	67758.5	336881
F11	16	66924.7	342296
F12	16	81423.2	326424
G1	16	92129.2	339276
G2	16	77014.8	333449
G3	16	53784.1	322182
G4	16	185956	335936
G5	16	198043	362137
G6	16	193705	339516
G7	16	215589	320756
G8	16	227535	358842
G9	16	231565	355293
G10	16	202810	334209
G11	16	236288	337582
G12	16	223370	335256
H1	16	192459	325317
H2	16	207701	330174
H3	16	193407	339182
H4	16	175286	334354
H5	16	193377	367462
H6	16	183438	342918
H7	16
H8	16
H9	16
H10	16
H11	16
H12	16
A1	17	128812	308210
A2	17	114538	353136
A3	17	76676.5	344601
A4	17	65086.5	347740
A5	17	60495.5	350768
A6	17	72584.6	362718
A7	17	61371	353375
A8	17	67804.5	360499
A9	17	70366.1	335785
A10	17	69696.7	315358
A11	17	77844.9	318761
A12	17	76197.7	270007
B1	17	110612	306009
B2	17	80307.7	344266
B3	17	66618.3	316586
B4	17	59350.6	325573
B5	17	63125	315188
B6	17	59524.1	325451
B7	17	61080.9	344993
B8	17	65817.7	362253
B9	17	62547	352529
B10	17	57074.2	330743
B11	17	62132	311502
B12	17	61974	277011
C1	17	128169	342596
C2	17	76102.8	333435
C3	17	62025.2	322894
C4	17	61989.5	321892
C5	17	57757	329781
C6	17	56235.7	311851
C7	17	181970	345824
C8	17	62067.4	334549
C9	17	62543.2	349908
C10	17	57822.3	330359
C11	17	60926	340758
C12	17	63643.6	303353
D1	17	67682.2	341275
D2	17	73822.2	328076
D3	17	62229.5	322766
D4	17	68618.9	320849
D5	17	61270.3	336071
D6	17	56855.6	329418
D7	17	60231.4	344042
D8	17	59447.4	347116
D9	17	69062.8	343190
D10	17	100514	355809
D11	17	63827	322664
D12	17	69311.3	323537
E1	17	93502.8	335145
E2	17	71760.7	313748
E3	17	69525.8	320578
E4	17	65899	325346
E5	17	68532.8	348862
E6	17	56228.7	342083
E7	17	61271.1	359612
E8	17	58724.5	346427
E9	17	58740.7	341566
E10	17	61174	336318
E11	17	73261	346494
E12	17	83019.7	322112
F1	17	71284	329429
F2	17	62705.9	319893
F3	17	55213.7	319837
F4	17	63019.3	325636
F5	17	71550.6	344136
F6	17	67319.8	348024
F7	17	58655.9	345077
F8	17	63979.2	345826
F9	17	59548	339664
F10	17	67907.9	336633
F11	17	66806.4	342879
F12	17	81780.2	327070
G1	17	92475.3	338972
G2	17	77284	333690
G3	17	54481.3	322176
G4	17	250535	337145
G5	17	267169	362184
G6	17	258842	340308
G7	17	280501	321496
G8	17	297953	359129
G9	17	304641	355899
G10	17	268840	334435
G11	17	302224	337593
G12	17	290281	335319
H1	17	241247	324227
H2	17	264446	330620
H3	17	259964	340533
H4	17	238195	335543
H5	17	262927	368000
H6	17	248150	343220
H7	17
H8	17
H9	17
H10	17
H11	17
H12	17
A1	18	129281	308331
A2	18	115947	352848
A3	18	78173.2	344609
A4	18	65480.4	347809
A5	18	60454	351301
A6	18	72724.5	362719
A7	18	62062.3	353024
A8	18	68642.7	360037
A9	18	71128.8	335537
A10	18	69750.3	315343
A11	18	77624.7	319215
A12	18	76629.7	269498
B1	18	113401	306271
B2	18	82703.3	344026
B3	18	68583.5	316831
B4	18	59854.5	325696
B5	18	63688.3	315105
B6	18	59630.4	325399
B7	18	62633.6	344155
B8	18	67383.6	361919
B9	18	63951.9	351938
B10	18	57532.6	329997
B11	18	62200.6	310709
B12	18	62386.9	276811
C1	18	130991	343537
C2	18	78463.1	333984
C3	18	64016.2	323677
C4	18	62009.5	321117
C5	18	57804	329696
C6	18	56153.4	311541
C7	18	182547	344743
C8	18	63494	334098
C9	18	64417	349627
C10	18	58232.3	330075
C11	18	61082.2	340561
C12	18	63912.7	303423
D1	18	70166.2	341357
D2	18	75935.9	328932
D3	18	65035.1	322705
D4	18	68444.6	320431
D5	18	61321.6	336158
D6	18	56590.4	329339
D7	18	61442.5	343658
D8	18	60681.6	347291
D9	18	70364.4	342603
D10	18	100687	355772
D11	18	64164.4	322438
D12	18	69006.3	323408
E1	18	96081.1	335220
E2	18	74339.7	314542
E3	18	71638.7	320836
E4	18	66397.4	325394
E5	18	68844.8	348751
E6	18	56111.3	341532
E7	18	62112.7	358913
E8	18	59774.3	343520
E9	18	59321.9	341183
E10	18	61045.5	336320
E11	18	73339.9	345830
E12	18	83069.3	321936
F1	18	71409.4	330481
F2	18	62763.3	319907
F3	18	54931	319288
F4	18	63607.8	325447
F5	18	71816.1	344803
F6	18	67382.7	348078
F7	18	58583.1	345346
F8	18	63959.2	345306
F9	18	59489.6	340048
F10	18	68137.6	336670
F11	18	67207.6	342566
F12	18	81579.5	326854
G1	18	92947.6	338313
G2	18	77327.7	333320
G3	18	54114.1	322534
G4	18	315244	336696
G5	18	336022	362852
G6	18	324139	340552
G7	18	337793	321119
G8	18	361806	358174
G9	18	369981	355398
G10	18	332213	334122
G11	18	365920	338152
G12	18	354128	334667
H1	18	287981	323330
H2	18	319759	330316
H3	18	326825	340675
H4	18	305758	335463
H5	18	337049	368347
H6	18	317813	344117
H7	18
H8	18
H9	18
H10	18
H11	18
H12	18
A1	19	131234	308776
A2	19	118220	353410
A3	19	80428.3	344874
A4	19	65442.2	347772
A5	19	60475.2	351335
A6	19	72526.5	363189
A7	19	63294.2	353751
A8	19	69842.8	360299
A9	19	72339.2	336234
A10	19	69916.9	315458
A11	19	77655.3	318843
A12	19	76767.1	269412
B1	19	117417	305903
B2	19	88015.4	344249
B3	19	73046.8	317068
B4	19	59962.4	325695
B5	19	64003.1	315592
B6	19	59644.3	325896
B7	19	65440.9	344232
B8	19	70076	361635
B9	19	67184	351603
B10	19	57234.1	329723
B11	19	62027.3	310577
B12	19	62542.9	276765
C1	19	136189	343799
C2	19	83359.1	335070
C3	19	68910.4	323224
C4	19	62594.2	320804
C5	19	58169.9	329161
C6	19	56670.7	311517
C7	19	185215	344610
C8	19	67173.7	334055
C9	19	67743	349949
C10	19	58225.2	329036
C11	19	61105.4	340301
C12	19	63952.8	303497
D1	19	75820.2	342179
D2	19	81724.8	328748
D3	19	70333	323013
D4	19	69273.4	320809
D5	19	61057.3	336212
D6	19	57146.9	329292
D7	19	64786.4	342965
D8	19	63846.2	347114
D9	19	73542.9	342593
D10	19	100773	355376
D11	19	64052.9	322033
D12	19	69380.6	322716
E1	19	101386	335811
E2	19	78656.8	315939
E3	19	75609.5	313866
E4	19	66979.1	325761
E5	19	69017.6	349687
E6	19	56317.9	342159
E7	19	64401.4	358512
E8	19	61134.3	343968
E9	19	61440.6	340643
E10	19	61212.5	336541
E11	19	73439.1	346169
E12	19	82857.9	321468
F1	19	71155.9	330279
F2	19	62262.6	320142
F3	19	55268.7	319912
F4	19	63542.3	325270
F5	19	71668.2	345383
F6	19	67576.8	348448
F7	19	58583	345102
F8	19	64161	345738
F9	19	59599.7	339253
F10	19	68000.1	336546
F11	19	67294.9	342579
F12	19	81981.5	326651
G1	19	93053.2	339245
G2	19	76999.8	333333
G3	19	54189.9	323145
G4	19	368550	337164
G5	19	392474	363322
G6	19	378713	341534
G7	19	382145	321390
G8	19	410114	358404
G9	19	419425	356524
G10	19	381372	334367
G11	19	415328	338539
G12	19	404635	334677
H1	19	326190	323540
H2	19	365655	330825
H3	19	381190	340830
H4	19	364970	336668
H5	19	401946	368691
H6	19	378259	344307
H7	19
H8	19
H9	19
H10	19
H11	19
H12	19
A1	20	135600	308263
A2	20	122277	353727
A3	20	84997.2	345029
A4	20	65582.4	348395
A5	20	61047.4	352200
A6	20	73094.3	363923
A7	20	65999.7	354178
A8	20	72890.4	360838
A9	20	74839.1	336929
A10	20	70194.3	315933
A11	20	78095.2	319723
A12	20	76846.4	270091
B1	20	125796	306484
B2	20	97615.6	344614
B3	20	82117.4	317817
B4	20	60408.7	325434
B5	20	64429.1	316234
B6	20	59815	326326
B7	20	71262.6	344898
B8	20	76135	362455
B9	20	72968.5	351955
B10	20	57576.6	330113
B11	20	62572.9	310844
B12	20	62538.8	277392
C1	20	145902	344709
C2	20	92663.2	335974
C3	20	77535.6	324360
C4	20	62855	320696
C5	20	58303.2	328629
C6	20	57049.3	311865
C7	20	191535	344788
C8	20	73598.5	334849
C9	20	73969.7	350371
C10	20	58385.8	329294
C11	20	61390.3	340687
C12	20	64132.7	303868
D1	20	86855.7	342269
D2	20	92080.8	329802
D3	20	80506.9	323691
D4	20	69885.1	321696
D5	20	61777.2	336835
D6	20	57523.9	330122
D7	20	70485.6	343369
D8	20	69930.8	347748
D9	20	78847.5	342641
D10	20	101367	356159
D11	20	64308.8	322347
D12	20	69665.8	323357
E1	20	111131	336519
E2	20	88171.2	317172
E3	20	84948.3	315058
E4	20	68107.1	326361
E5	20	70037.8	350284
E6	20	56925.9	343267
E7	20	68052.9	359324
E8	20	65026.9	344068
E9	20	65207.4	340964
E10	20	61729.5	336925
E11	20	74102.6	346235
E12	20	82834.9	322069
F1	20	71489.3	330756
F2	20	62554.3	320217
F3	20	55093.9	320198
F4	20	63937.8	325692
F5	20	71937.9	346368
F6	20	67570.6	348687
F7	20	58991.9	345607
F8	20	64420.3	345540
F9	20	59855.5	339705
F10	20	68241.1	336570
F11	20	67290.9	342420
F12	20	81803.2	327205
G1	20	93038.6	338550
G2	20	77183.3	333671
G3	20	54486.7	323028
G4	20	405959	337687
G5	20	432604	363894
G6	20	416829	342344
G7	20	412209	321447
G8	20	443203	358477
G9	20	453183	357032
G10	20	416301	334553
G11	20	451276	338854
G12	20	439497	334690
H1	20	352442	322778
H2	20	400276	330528
H3	20	421443	341476
H4	20	407864	337079
H5	20	449036	369667
H6	20	422393	344678
H7	20
H8	20
H9	20
H10	20
H11	20
H12	20
A1	21	143188	308941
A2	21	130555	354290
A3	21	92703	345192
A4	21	66039	348451
A5	21	61113.9	352637
A6	21	73432.3	363848
A7	21	70521.8	354246
A8	21	77364.2	361380
A9	21	78569.4	337510
A10	21	70184.2	315877
A11	21	78902.4	319629
A12	21	76538.9	269944
B1	21	140834	306727
B2	21	115381	344470
B3	21	97828.9	317877
B4	21	60948.9	325508
B5	21	65424.7	316457
B6	21	60407.9	326570
B7	21	81360.1	344591
B8	21	86259.7	361994
B9	21	83473.5	351245
B10	21	57784.2	330314
B11	21	62836.1	310911
B12	21	62106.2	277559
C1	21	162841	345553
C2	21	108835	335902
C3	21	93015.3	324637
C4	21	63822.5	320478
C5	21	59257.8	328989
C6	21	57548.5	312423
C7	21	202570	344488
C8	21	84679.5	334609
C9	21	85979.1	350600
C10	21	59070.6	329200
C11	21	61751.5	340186
C12	21	64229.5	303417
D1	21	106664	342107
D2	21	110814	329326
D3	21	99286.7	324391
D4	21	70294	321555
D5	21	62568.6	336570
D6	21	58672.7	329981
D7	21	80698.2	342654
D8	21	80554.4	347048
D9	21	89669.9	342288
D10	21	101169	356467
D11	21	64667.7	322739
D12	21	69457.8	322774
E1	21	129041	336587
E2	21	103988	317606
E3	21	102251	316028
E4	21	69130.2	326587
E5	21	71383.8	350701
E6	21	57411.6	343542
E7	21	75227.8	359092
E8	21	71865.4	344018
E9	21	71473.8	340550
E10	21	61631.1	336565
E11	21	73616.7	346115
E12	21	83463.9	321829
F1	21	70902.8	330744
F2	21	62306.4	319820
F3	21	55176	319981
F4	21	63542.2	325747
F5	21	72267	346326
F6	21	68142.7	348834
F7	21	58943.7	345610
F8	21	64351	344736
F9	21	59604.3	339262
F10	21	68472.7	336469
F11	21	67610	343216
F12	21	82152.4	327109
G1	21	93246.2	338822
[truncated: 11,255 more rows]

## Sheet: Amplification Data
Block Type	96alum
Chemistry	SYBR_GREEN
Experiment File Name
Experiment Run End Time	Not Started
Instrument Type	sds7500
Passive Reference	ROX
Well	Cycle	Target Name	Rn	ΔRn
A1	1	VEGFA	0.378213	-0.00127951
A1	2	VEGFA	0.381181	-0.000637313
A1	3	VEGFA	0.381948	-0.00219634
A1	4	VEGFA	0.386835	0.000364323
A1	5	VEGFA	0.38868	-0.000116995
A1	6	VEGFA	0.390995	-0.000128628
A1	7	VEGFA	0.394688	0.00123845
A1	8	VEGFA	0.395942	0.000166067
A1	9	VEGFA	0.399028	0.000924884
A1	10	VEGFA	0.402598	0.00216858
A1	11	VEGFA	0.402974	0.000218638
A1	12	VEGFA	0.403746	-0.00133589
A1	13	VEGFA	0.407014	-0.000394178
A1	14	VEGFA	0.41051	0.000775583
A1	15	VEGFA	0.412465	0.000403998
A1	16	VEGFA	0.410822	-0.00356464
A1	17	VEGFA	0.417937	0.00122351
A1	18	VEGFA	0.419292	0.000252631
A1	19	VEGFA	0.425015	0.00364913
A1	20	VEGFA	0.439883	0.0161904
A1	21	VEGFA	0.463479	0.0374606
A1	22	VEGFA	0.504958	0.0766129
A1	23	VEGFA	0.58064	0.149968
A1	24	VEGFA	0.700805	0.267808
A1	25	VEGFA	0.869209	0.433886
A1	26	VEGFA	1.05638	0.618734
A1	27	VEGFA	1.22462	0.784647
A1	28	VEGFA	1.36378	0.921477
A1	29	VEGFA	1.45612	1.01149
A1	30	VEGFA	1.51704	1.07009
A1	31	VEGFA	1.5655	1.11622
A1	32	VEGFA	1.60219	1.15058
A1	33	VEGFA	1.62154	1.1676
A1	34	VEGFA	1.64554	1.18928
A1	35	VEGFA	1.6581	1.19951
A1	36	VEGFA	1.66708	1.20616
A1	37	VEGFA	1.67632	1.21308
A1	38	VEGFA	1.68866	1.22309
A1	39	VEGFA	1.69047	1.22257
A1	40	VEGFA	1.69832	1.2281
A1	41	VEGFA	1.69982	1.22728
A1	42	VEGFA	1.70018	1.22531
A1	43	VEGFA	1.70343	1.22623
A1	44	VEGFA	1.70178	1.22225
A1	45	VEGFA	1.7019	1.22005
A2	1	VEGFA	0.314662	0.00698165
A2	2	VEGFA	0.313109	0.00436337
A2	3	VEGFA	0.311247	0.00143776
A2	4	VEGFA	0.311044	0.000170026
A2	5	VEGFA	0.310927	-0.00101083
A2	6	VEGFA	0.312217	-0.000785739
A2	7	VEGFA	0.313917	-0.000150385
A2	8	VEGFA	0.315019	-0.000112241
A2	9	VEGFA	0.316351	0.000155292
A2	10	VEGFA	0.318246	0.000985523
A2	11	VEGFA	0.318993	0.00066896
A2	12	VEGFA	0.31947	8.08092e-05
A2	13	VEGFA	0.320099	-0.000354009
A2	14	VEGFA	0.320387	-0.00113024
A2	15	VEGFA	0.321026	-0.00155549
A2	16	VEGFA	0.322782	-0.000864113
A2	17	VEGFA	0.324347	-0.000364092
A2	18	VEGFA	0.328604	0.00282878
A2	19	VEGFA	0.334512	0.00767311
A2	20	VEGFA	0.345682	0.0177783
A2	21	VEGFA	0.368498	0.0395299
A2	22	VEGFA	0.412363	0.0823302
A2	23	VEGFA	0.488694	0.157598
A2	24	VEGFA	0.611131	0.27897
A2	25	VEGFA	0.779803	0.446577
A2	26	VEGFA	0.973134	0.638844
A2	27	VEGFA	1.14367	0.808315
A2	28	VEGFA	1.27928	0.94286
A2	29	VEGFA	1.37357	1.03609
A2	30	VEGFA	1.44055	1.10201
A2	31	VEGFA	1.48168	1.14207
A2	32	VEGFA	1.51559	1.17491
A2	33	VEGFA	1.54121	1.19947
A2	34	VEGFA	1.56243	1.21963
A2	35	VEGFA	1.57323	1.22936
A2	36	VEGFA	1.58722	1.24229
A2	37	VEGFA	1.59301	1.24701
A2	38	VEGFA	1.6036	1.25654
A2	39	VEGFA	1.6053	1.25717
A2	40	VEGFA	1.61076	1.26157
A2	41	VEGFA	1.61648	1.26622
A2	42	VEGFA	1.61556	1.26424
A2	43	VEGFA	1.61583	1.26345
A2	44	VEGFA	1.61509	1.26164
A2	45	VEGFA	1.61668	1.26216
A3	1	VEGFA	0.22525	0.00841465
A3	2	VEGFA	0.222104	0.00489146
A3	3	VEGFA	0.219889	0.00229994
A3	4	VEGFA	0.218321	0.000355199
A3	5	VEGFA	0.219107	0.000763931
A3	6	VEGFA	0.217962	-0.000758483
A3	7	VEGFA	0.219308	0.000211009
A3	8	VEGFA	0.219012	-0.00046183
A3	9	VEGFA	0.218634	-0.0012173
A3	10	VEGFA	0.218933	-0.00129475
A3	11	VEGFA	0.219169	-0.00143593
A3	12	VEGFA	0.221202	0.000220107
A3	13	VEGFA	0.221373	1.43895e-05
A3	14	VEGFA	0.220152	-0.00158407
A3	15	VEGFA	0.221488	-0.000624855
A3	16	VEGFA	0.222759	0.000268969
A3	17	VEGFA	0.222508	-0.000358616
A3	18	VEGFA	0.226846	0.00360227
A3	19	VEGFA	0.233211	0.00958992
A3	20	VEGFA	0.246348	0.0223502
A3	21	VEGFA	0.268555	0.04418
A3	22	VEGFA	0.311416	0.0866646
A3	23	VEGFA	0.386742	0.161614
A3	24	VEGFA	0.507499	0.281994
A3	25	VEGFA	0.679427	0.453545
A3	26	VEGFA	0.869927	0.643667
A3	27	VEGFA	1.0436	0.816959
A3	28	VEGFA	1.17562	0.94861
A3	29	VEGFA	1.26885	1.04145
A3	30	VEGFA	1.33406	1.10629
A3	31	VEGFA	1.38291	1.15476
A3	32	VEGFA	1.41408	1.18556
A3	33	VEGFA	1.44157	1.21267
A3	34	VEGFA	1.46358	1.23431
A3	35	VEGFA	1.47374	1.24409
A3	36	VEGFA	1.48679	1.25676
A3	37	VEGFA	1.49544	1.26504
A3	38	VEGFA	1.50543	1.27465
A3	39	VEGFA	1.50613	1.27497
A3	40	VEGFA	1.50434	1.2728
A3	41	VEGFA	1.5087	1.27679
A3	42	VEGFA	1.50823	1.27594
A3	43	VEGFA	1.50475	1.27208
A3	44	VEGFA	1.50552	1.27247
A3	45	VEGFA	1.5068	1.27337
A4	1	JUN	0.194935	0.00814117
A4	2	JUN	0.191093	0.00414371
A4	3	JUN	0.190835	0.00373109
A4	4	JUN	0.18902	0.00176134
A4	5	JUN	0.187545	0.00013081
A4	6	JUN	0.187599	3.04098e-05
A4	7	JUN	0.187735	1.15784e-05
A4	8	JUN	0.187849	-2.99325e-05
A4	9	JUN	0.187578	-0.000455417
A4	10	JUN	0.18797	-0.000218112
A4	11	JUN	0.187956	-0.00038743
A4	12	JUN	0.187753	-0.000744995
A4	13	JUN	0.186939	-0.00171485
A4	14	JUN	0.187365	-0.00144381
A4	15	JUN	0.187182	-0.0017812
A4	16	JUN	0.187975	-0.001143
A4	17	JUN	0.18717	-0.00210302
A4	18	JUN	0.188266	-0.00116241
A4	19	JUN	0.188175	-0.00140773
A4	20	JUN	0.188241	-0.00149661
A4	21	JUN	0.189522	-0.000371359
A4	22	JUN	0.190151	0.000103112
A4	23	JUN	0.191839	0.00163586
A4	24	JUN	0.197413	0.00705567
A4	25	JUN	0.203191	0.0126783
A4	26	JUN	0.218809	0.0281416
A4	27	JUN	0.245989	0.0551662
A4	28	JUN	0.295518	0.104541
A4	29	JUN	0.382231	0.191098
A4	30	JUN	0.51893	0.327643
A4	31	JUN	0.694705	0.503263
A4	32	JUN	0.884968	0.693371
A4	33	JUN	1.05244	0.860691
A4	34	JUN	1.18386	0.991956
A4	35	JUN	1.2777	1.08564
A4	36	JUN	1.3446	1.15238
A4	37	JUN	1.39739	1.20502
A4	38	JUN	1.43328	1.24075
A4	39	JUN	1.45913	1.26645
A4	40	JUN	1.48138	1.28855
A4	41	JUN	1.50373	1.31074
A4	42	JUN	1.51576	1.32262
A4	43	JUN	1.52507	1.33177
A4	44	JUN	1.53896	1.34551
A4	45	JUN	1.54962	1.35601
A5	1	JUN	0.175246	0.00514419
A5	2	JUN	0.171616	0.00128363
A5	3	JUN	0.172198	0.0016351
A5	4	JUN	0.171348	0.000554314
A5	5	JUN	0.170678	-0.000345364
A5	6	JUN	0.171773	0.000519285
A5	7	JUN	0.171504	1.94493e-05
A5	8	JUN	0.172415	0.000699816
A5	9	JUN	0.172434	0.000489033
A5	10	JUN	0.171537	-0.00063835
A5	11	JUN	0.172692	0.000285859
A5	12	JUN	0.172336	-0.000300582
A5	13	JUN	0.172735	-0.000131832
A5	14	JUN	0.172051	-0.0010465
A5	15	JUN	0.172478	-0.000849797
A5	16	JUN	0.173353	-0.000204672
A5	17	JUN	0.172466	-0.00132228
A5	18	JUN	0.172086	-0.00193237
A5	19	JUN	0.17213	-0.0021191
A5	20	JUN	0.173332	-0.0011478
A5	21	JUN	0.173305	-0.0014045
A5	22	JUN	0.175829	0.00088886
A5	23	JUN	0.1766	0.00142932
A5	24	JUN	0.180323	0.00492212
A5	25	JUN	0.186894	0.0112624
A5	26	JUN	0.202557	0.0266952
A5	27	JUN	0.228099	0.0520072
A5	28	JUN	0.275841	0.0995186
A5	29	JUN	0.359813	0.18326
A5	30	JUN	0.492359	0.315576
A5	31	JUN	0.668187	0.491174
A5	32	JUN	0.859612	0.682368
A5	33	JUN	1.0355	0.858023
A5	34	JUN	1.17093	0.993228
A5	35	JUN	1.27048	1.09255
A5	36	JUN	1.34091	1.16275
A5	37	JUN	1.39416	1.21576
A5	38	JUN	1.43254	1.25391
A5	39	JUN	1.46052	1.28166
A5	40	JUN	1.48322	1.30414
A5	41	JUN	1.50518	1.32586
A5	42	JUN	1.52055	1.341
A5	43	JUN	1.5297	1.34992
A5	44	JUN	1.54212	1.36211
A5	45	JUN	1.55315	1.37292
A6	1	JUN	0.195178	0.00058796
A6	2	JUN	0.194152	-0.000837061
A6	3	JUN	0.194279	-0.00110849
A6	4	JUN	0.195401	-0.000384602
A6	5	JUN	0.196315	0.000130822
A6	6	JUN	0.196904	0.000320849
A6	7	JUN	0.196642	-0.000339265
A6	8	JUN	0.198134	0.000753921
A6	9	JUN	0.198577	0.000797961
A6	10	JUN	0.199483	0.00130576
A6	11	JUN	0.199654	0.00107831
A6	12	JUN	0.199604	0.000629451
A6	13	JUN	0.199577	0.000203509
A6	14	JUN	0.199835	6.3058e-05
A6	15	JUN	0.200051	-0.000119399
A6	16	JUN	0.199643	-0.000926305
A6	17	JUN	0.200113	-0.00085425
A6	18	JUN	0.200498	-0.000867997
A6	19	JUN	0.199693	-0.00207135
A6	20	JUN	0.200851	-0.00131251
A6	21	JUN	0.201821	-0.000740853
A6	22	JUN	0.202404	-0.000556801
A6	23	JUN	0.203699	0.000339362
A6	24	JUN	0.207417	0.00365883
A6	25	JUN	0.213294	0.00913756
A6	26	JUN	0.223983	0.0194282
A6	27	JUN	0.245601	0.0406477
A6	28	JUN	0.285189	0.079837
A6	29	JUN	0.356867	0.151116
A6	30	JUN	0.472453	0.266303
A6	31	JUN	0.636092	0.429544
A6	32	JUN	0.823832	0.616886
A6	33	JUN	1.00112	0.793775
A6	34	JUN	1.14408	0.936341
A6	35	JUN	1.25098	1.04283
A6	36	JUN	1.3274	1.11886
A6	37	JUN	1.38322	1.17428
A6	38	JUN	1.42717	1.21783
A6	39	JUN	1.45796	1.24822
A6	40	JUN	1.48125	1.27112
A6	41	JUN	1.502	1.29147
A6	42	JUN	1.51993	1.309
A6	43	JUN	1.52895	1.31762
A6	44	JUN	1.54045	1.32872
A6	45	JUN	1.55381	1.34168
A7	1	MAPK3	0.17419	0.00602443
A7	2	MAPK3	0.171181	0.00263304
A7	3	MAPK3	0.169427	0.000497938
A7	4	MAPK3	0.169849	0.000538031
A7	5	MAPK3	0.170525	0.000832382
A7	6	MAPK3	0.170498	0.000424173
A7	7	MAPK3	0.170389	-6.66032e-05
A7	8	MAPK3	0.171344	0.00050704
A7	9	MAPK3	0.170689	-0.000530132
A7	10	MAPK3	0.171111	-0.000489145
A7	11	MAPK3	0.171583	-0.000398746
A7	12	MAPK3	0.172382	1.9031e-05
A7	13	MAPK3	0.17166	-0.00108515
A7	14	MAPK3	0.171689	-0.00143748
A7	15	MAPK3	0.17178	-0.00172776
A7	16	MAPK3	0.172369	-0.00152058
A7	17	MAPK3	0.173671	-0.000600458
A7	18	MAPK3	0.175802	0.00114913
A7	19	MAPK3	0.178923	0.00388834
A7	20	MAPK3	0.186346	0.0109303
A7	21	MAPK3	0.199076	0.0232781
A7	22	MAPK3	0.223604	0.047425
A7	23	MAPK3	0.268875	0.0923143
A7	24	MAPK3	0.349394	0.172452
A7	25	MAPK3	0.476689	0.299365
A7	26	MAPK3	0.645114	0.467409
A7	27	MAPK3	0.832493	0.654406
A7	28	MAPK3	1.00124	0.822769
A7	29	MAPK3	1.13602	0.957171
A7	30	MAPK3	1.23376	1.05453
A7	31	MAPK3	1.29811	1.1185
A7	32	MAPK3	1.34641	1.16641
A7	33	MAPK3	1.3853	1.20492
A7	34	MAPK3	1.41473	1.23397
A7	35	MAPK3	1.4319	1.25076
A7	36	MAPK3	1.45006	1.26854
A7	37	MAPK3	1.46692	1.28502
A7	38	MAPK3	1.47677	1.29449
A7	39	MAPK3	1.48395	1.30128
A7	40	MAPK3	1.48892	1.30587
A7	41	MAPK3	1.50054	1.31711
A7	42	MAPK3	1.50376	1.31995
A7	43	MAPK3	1.50606	1.32187
A7	44	MAPK3	1.50927	1.3247
A7	45	MAPK3	1.51541	1.33046
A8	1	MAPK3	0.190297	0.00593444
A8	2	MAPK3	0.187277	0.00262392
A8	3	MAPK3	0.18627	0.00132683
A8	4	MAPK3	0.186487	0.00125302
A8	5	MAPK3	0.185542	1.84601e-05
A8	6	MAPK3	0.185781	-3.33825e-05
A8	7	MAPK3	0.186473	0.00036783
A8	8	MAPK3	0.185866	-0.000529162
A8	9	MAPK3	0.186557	-0.00012871
A8	10	MAPK3	0.186358	-0.000618512
A8	11	MAPK3	0.18716	-0.000107091
A8	12	MAPK3	0.186322	-0.00123516
A8	13	MAPK3	0.186934	-0.00091426
A8	14	MAPK3	0.187202	-0.000936554
A8	15	MAPK3	0.186454	-0.00197496
A8	16	MAPK3	0.187545	-0.00117417
A8	17	MAPK3	0.188085	-0.000924667
A8	18	MAPK3	0.190654	0.00135427
A8	19	MAPK3	0.193847	0.00425621
A8	20	MAPK3	0.202003	0.0121216
A8	21	MAPK3	0.21408	0.0239084
A8	22	MAPK3	0.239344	0.0488819
A8	23	MAPK3	0.286874	0.0961214
A8	24	MAPK3	0.368042	0.176999
A8	25	MAPK3	0.496918	0.305584
A8	26	MAPK3	0.671383	0.479759
A8	27	MAPK3	0.863131	0.671217
A8	28	MAPK3	1.03344	0.841236
A8	29	MAPK3	1.17019	0.977696
A8	30	MAPK3	1.26973	1.07694
A8	31	MAPK3	1.33756	1.14448
A8	32	MAPK3	1.38586	1.19249
A8	33	MAPK3	1.4272	1.23354
A8	34	MAPK3	1.45593	1.26199
A8	35	MAPK3	1.47586	1.28162
A8	36	MAPK3	1.49231	1.29778
A8	37	MAPK3	1.50934	1.31452
A8	38	MAPK3	1.52185	1.32674
A8	39	MAPK3	1.5261	1.3307
A8	40	MAPK3	1.53449	1.3388
A8	41	MAPK3	1.54622	1.35024
A8	42	MAPK3	1.55218	1.3559
A8	43	MAPK3	1.55178	1.35521
A8	44	MAPK3	1.55918	1.36232
A8	45	MAPK3	1.56637	1.36923
A9	1	MAPK3	0.209797	0.00829303
A9	2	MAPK3	0.206075	0.00407445
A9	3	MAPK3	0.205058	0.00256114
A9	4	MAPK3	0.204095	0.00110206
A9	5	MAPK3	0.204263	0.000773355
A9	6	MAPK3	0.204332	0.000345659
A9	7	MAPK3	0.203913	-0.000569782
A9	8	MAPK3	0.204601	-0.000377948
A9	9	MAPK3	0.205695	0.000219452
A9	10	MAPK3	0.204417	-0.00155498
A9	11	MAPK3	0.204946	-0.00152332
A9	12	MAPK3	0.205904	-0.00106171
A9	13	MAPK3	0.205574	-0.00188814
A9	14	MAPK3	0.205263	-0.00269578
A9	15	MAPK3	0.207139	-0.00131567
A9	16	MAPK3	0.208084	-0.000867981
A9	17	MAPK3	0.209557	0.000108832
A9	18	MAPK3	0.211985	0.0020406
A9	19	MAPK3	0.215145	0.00470421
A9	20	MAPK3	0.222121	0.0111836
A9	21	MAPK3	0.232792	0.0213574
A9	22	MAPK3	0.260279	0.048348
A9	23	MAPK3	0.305938	0.0935106
A9	24	MAPK3	0.388514	0.175591
A9	25	MAPK3	0.514082	0.300661
A9	26	MAPK3	0.688094	0.474177
A9	27	MAPK3	0.87761	0.663197
A9	28	MAPK3	1.04877	0.833858
A9	29	MAPK3	1.18319	0.967782
A9	30	MAPK3	1.27994	1.06404
A9	31	MAPK3	1.35039	1.13399
A9	32	MAPK3	1.39802	1.18112
A9	33	MAPK3	1.43653	1.21914
A9	34	MAPK3	1.46556	1.24767
A9	35	MAPK3	1.48524	1.26686
A9	36	MAPK3	1.5015	1.28262
A9	37	MAPK3	1.51592	1.29654
A9	38	MAPK3	1.52876	1.30889
A9	39	MAPK3	1.53269	1.31232
A9	40	MAPK3	1.54125	1.32038
A9	41	MAPK3	1.54652	1.32516
A9	42	MAPK3	1.54944	1.32758
A9	43	MAPK3	1.54916	1.32681
A9	44	MAPK3	1.55379	1.33093
A9	45	MAPK3	1.55493	1.33158
A10	1	IL-6	0.227157	0.00981511
A10	2	IL-6	0.222329	0.00470371
A10	3	IL-6	0.220307	0.00239775
A10	4	IL-6	0.219088	0.000894519
A10	5	IL-6	0.218214	-0.00026323
A10	6	IL-6	0.218992	0.000230829
A10	7	IL-6	0.220817	0.00177278
A10	8	IL-6	0.218936	-0.000392076
A10	9	IL-6	0.219644	3.1545e-05
A10	10	IL-6	0.21971	-0.000185762
A10	11	IL-6	0.219022	-0.00115854
A10	12	IL-6	0.220223	-0.000241232
A10	13	IL-6	0.22043	-0.000317515
A10	14	IL-6	0.219907	-0.00112464
A10	15	IL-6	0.220228	-0.00108744
A10	16	IL-6	0.220257	-0.00134267
A10	17	IL-6	0.221008	-0.000874833
A10	18	IL-6	0.221188	-0.000978638
A10	19	IL-6	0.221636	-0.000814684
A10	20	IL-6	0.222181	-0.000554037
A10	21	IL-6	0.222188	-0.000830189
A10	22	IL-6	0.222064	-0.00123837
A10	23	IL-6	0.223094	-0.000492536
A10	24	IL-6	0.224087	0.000216368
A10	25	IL-6	0.224694	0.000540048
A10	26	IL-6	0.23025	0.00581254
A10	27	IL-6	0.235697	0.0109756
A10	28	IL-6	0.247436	0.0224304
A10	29	IL-6	0.270889	0.0455996
A10	30	IL-6	0.313855	0.0882814
A10	31	IL-6	0.393818	0.167961
A10	32	IL-6	0.525017	0.298876
A10	33	IL-6	0.716786	0.490361
A10	34	IL-6	0.94662	0.719911
A10	35	IL-6	1.1519	0.924903
A10	36	IL-6	1.28574	1.05846
A10	37	IL-6	1.36345	1.13589
A10	38	IL-6	1.4144	1.18656
A10	39	IL-6	1.44158	1.21345
A10	40	IL-6	1.46849	1.24008
A10	41	IL-6	1.49391	1.26522
A10	42	IL-6	1.50979	1.28081
A10	43	IL-6	1.52556	1.2963
A10	44	IL-6	1.53806	1.30851
A10	45	IL-6	1.55224	1.32241
A11	1	IL-6	0.251484	0.0116535
A11	2	IL-6	0.2443	0.00411976
A11	3	IL-6	0.241287	0.000757411
A11	4	IL-6	0.242927	0.00204819
A11	5	IL-6	0.242432	0.00120407
A11	6	IL-6	0.241747	0.000169763
A11	7	IL-6	0.239965	-0.00196213
A11	8	IL-6	0.241885	-0.00039121
A11	9	IL-6	0.243888	0.00126298
A11	10	IL-6	0.242712	-0.000262616
A11	11	IL-6	0.249205	0.00588074
A11	12	IL-6	0.243249	-0.00042391
A11	13	IL-6	0.241925	-0.00209786
A11	14	IL-6	0.242508	-0.00186414
A11	15	IL-6	0.244677	-4.36383e-05
A11	16	IL-6	0.243962	-0.00110799
A11	17	IL-6	0.244211	-0.00120867
A11	18	IL-6	0.243174	-0.00259523
A11	19	IL-6	0.243554	-0.00256468
A11	20	IL-6	0.244259	-0.00220856
A11	21	IL-6	0.246856	3.89774e-05
A11	22	IL-6	0.244471	-0.00269472
A11	23	IL-6	0.247351	-0.000164517
A11	24	IL-6	0.247234	-0.000631208
A11	25	IL-6	0.246816	-0.00139822
A11	26	IL-6	0.25022	0.00165689
A11	27	IL-6	0.257513	0.00860028
A11	28	IL-6	0.266138	0.0168765
A11	29	IL-6	0.286361	0.0367501
A11	30	IL-6	0.321541	0.0715808
A11	31	IL-6	0.384549	0.134239
A11	32	IL-6	0.499359	0.2487
A11	33	IL-6	0.675124	0.424115
A11	34	IL-6	0.900656	0.649298
A11	35	IL-6	1.12026	0.868555
A11	36	IL-6	1.28123	1.02917
A11	37	IL-6	1.37481	1.12241
A11	38	IL-6	1.42987	1.17711
A11	39	IL-6	1.46551	1.2124
A11	40	IL-6	1.49559	1.24213
A11	41	IL-6	1.52629	1.27249
A11	42	IL-6	1.54052	1.28637
A11	43	IL-6	1.5538	1.2993
A11	44	IL-6	1.57194	1.31709
A11	45	IL-6	1.58538	1.33018
A12	1	IL-6	0.288635	0.0116895
A12	2	IL-6	0.284053	0.0066675
A12	3	IL-6	0.280515	0.00268891
A12	4	IL-6	0.278489	0.000221711
A12	5	IL-6	0.277825	-0.000882776
A12	6	IL-6	0.278889	-0.000259681
A12	7	IL-6	0.280594	0.00100503
A12	8	IL-6	0.280321	0.000291696
A12	9	IL-6	0.281576	0.00110633
A12	10	IL-6	0.281143	0.000231887
A12	11	IL-6	0.281152	-0.000198889
A12	12	IL-6	0.280846	-0.000945449
A12	13	IL-6	0.281707	-0.000524951
A12	14	IL-6	0.281421	-0.00125238
A12	15	IL-6	0.282453	-0.000660071
A12	16	IL-6	0.282906	-0.000648192
A12	17	IL-6	0.282207	-0.00178802
A12	18	IL-6	0.284342	-9.31494e-05
A12	19	IL-6	0.284943	6.68764e-05
A12	20	IL-6	0.28452	-0.000796301
A12	21	IL-6	0.283537	-0.00222042
A12	22	IL-6	0.285281	-0.000916489
A12	23	IL-6	0.285126	-0.00151231
A12	24	IL-6	0.288163	0.00108471
A12	25	IL-6	0.287763	0.000243409
A12	26	IL-6	0.293718	0.00575852
A12	27	IL-6	0.30074	0.0123391
A12	28	IL-6	0.317876	0.0290347
A12	29	IL-6	0.3509	0.0616184
A12	30	IL-6	0.40947	0.119747
A12	31	IL-6	0.508295	0.218132
A12	32	IL-6	0.667099	0.376496
A12	33	IL-6	0.877147	0.586103
A12	34	IL-6	1.09085	0.799362
A12	35	IL-6	1.24869	0.956765
A12	36	IL-6	1.34391	1.05155
A12	37	IL-6	1.40073	1.10792
A12	38	IL-6	1.44263	1.14938
A12	39	IL-6	1.46123	1.16754
A12	40	IL-6	1.48903	1.1949
A12	41	IL-6	1.51277	1.2182
A12	42	IL-6	1.52367	1.22866
A12	43	IL-6	1.53831	1.24286
A12	44	IL-6	1.55318	1.25729
A12	45	IL-6	1.5639	1.26757
B1	1	VEGFA	0.346196	0.0116088
B1	2	VEGFA	0.335413	-0.000756256
B1	3	VEGFA	0.336372	-0.00137905
B1	4	VEGFA	0.339592	0.000259565
B1	5	VEGFA	0.341303	0.000389343
B1	6	VEGFA	0.341914	-0.000581776
B1	7	VEGFA	0.34577	0.00169282
B1	8	VEGFA	0.347056	0.00139788
B1	9	VEGFA	0.347666	0.000426047
B1	10	VEGFA	0.349382	0.000560176
B1	11	VEGFA	0.349898	-0.00050482
B1	12	VEGFA	0.350875	-0.00110946
B1	13	VEGFA	0.352617	-0.000949641
B1	14	VEGFA	0.35322	-0.00192821
B1	15	VEGFA	0.355557	-0.00117241
B1	16	VEGFA	0.359636	0.00132526
B1	17	VEGFA	0.361467	0.00157427
B1	18	VEGFA	0.370265	0.00879036
B1	19	VEGFA	0.383837	0.0207807
B1	20	VEGFA	0.41045	0.0458123
B1	21	VEGFA	0.45915	0.0929308
B1	22	VEGFA	0.546264	0.178463
B1	23	VEGFA	0.678591	0.309208
B1	24	VEGFA	0.854366	0.483402
B1	25	VEGFA	1.04405	0.671503
B1	26	VEGFA	1.20708	0.832953
B1	27	VEGFA	1.33546	0.959746
B1	28	VEGFA	1.41968	1.04239
B1	29	VEGFA	1.48254	1.10367
B1	30	VEGFA	1.52471	1.14426
B1	31	VEGFA	1.5575	1.17547
B1	32	VEGFA	1.58041	1.1968
B1	33	VEGFA	1.5969	1.2117
B1	34	VEGFA	1.61452	1.22774
B1	35	VEGFA	1.62304	1.23468
B1	36	VEGFA	1.6349	1.24496
B1	37	VEGFA	1.64484	1.25331
B1	38	VEGFA	1.6496	1.25649
B1	39	VEGFA	1.64986	1.25517
B1	40	VEGFA	1.65599	1.25972
B1	41	VEGFA	1.65398	1.25612
B1	42	VEGFA	1.65702	1.25758
B1	43	VEGFA	1.65636	1.25535
B1	44	VEGFA	1.65802	1.25542
B1	45	VEGFA	1.66169	1.25751
B2	1	VEGFA	0.219386	0.00551244
B2	2	VEGFA	0.21746	0.00256485
B2	3	VEGFA	0.216708	0.000791143
B2	4	VEGFA	0.217516	0.000578003
B2	5	VEGFA	0.218053	9.32006e-05
B2	6	VEGFA	0.219648	0.000666961
B2	7	VEGFA	0.220148	0.000144846
B2	8	VEGFA	0.220416	-0.000608341
B2	9	VEGFA	0.221361	-0.000685672
B2	10	VEGFA	0.223422	0.000354466
B2	11	VEGFA	0.22312	-0.000969913
B2	12	VEGFA	0.223512	-0.00159908
B2	13	VEGFA	0.225831	-0.000301538
B2	14	VEGFA	0.225698	-0.00145659
B2	15	VEGFA	0.227613	-0.000562653
B2	16	VEGFA	0.229699	0.000501803
B2	17	VEGFA	0.233272	0.00305337
B2	18	VEGFA	0.240399	0.00915809
B2	19	VEGFA	0.255674	0.0234118
B2	20	VEGFA	0.283261	0.0499768
B2	21	VEGFA	0.334953	0.100648
B2	22	VEGFA	0.422077	0.18675
B2	23	VEGFA	0.559019	0.32267
B2	24	VEGFA	0.740669	0.503298
B2	25	VEGFA	0.933674	0.695283
B2	26	VEGFA	1.10371	0.864292
B2	27	VEGFA	1.22712	0.986684
B2	28	VEGFA	1.31004	1.06858
B2	29	VEGFA	1.37383	1.13135
B2	30	VEGFA	1.42084	1.17734
B2	31	VEGFA	1.4509	1.20638
B2	32	VEGFA	1.47419	1.22865
B2	33	VEGFA	1.49483	1.24827
B2	34	VEGFA	1.50847	1.26088
B2	35	VEGFA	1.5179	1.26929
B2	36	VEGFA	1.52739	1.27776
B2	37	VEGFA	1.53408	1.28343
B2	38	VEGFA	1.54188	1.29021
B2	39	VEGFA	1.54187	1.28918
B2	40	VEGFA	1.54081	1.2871
B2	41	VEGFA	1.54801	1.29327
B2	42	VEGFA	1.54717	1.29141
B2	43	VEGFA	1.54716	1.29038
B2	44	VEGFA	1.54547	1.28767
B2	45	VEGFA	1.54666	1.28784
B3	1	VEGFA	0.198576	0.00504129
B3	2	VEGFA	0.196072	0.00176825
B3	3	VEGFA	0.19618	0.00110583
B3	4	VEGFA	0.197028	0.0011844
B3	5	VEGFA	0.196933	0.000319636
B3	6	VEGFA	0.197587	0.000204223
B3	7	VEGFA	0.198373	0.000220656
B3	8	VEGFA	0.197564	-0.00135768
B3	9	VEGFA	0.199452	-0.000239708
B3	10	VEGFA	0.200681	0.000219543
B3	11	VEGFA	0.200295	-0.000935718
B3	12	VEGFA	0.19959	-0.00241085
B3	13	VEGFA	0.201627	-0.00114385
B3	14	VEGFA	0.202804	-0.000736112
B3	15	VEGFA	0.203203	-0.00110677
B3	16	VEGFA	0.205178	9.83762e-05
B3	17	VEGFA	0.210427	0.00457802
B3	18	VEGFA	0.216467	0.00984826
B3	19	VEGFA	0.230382	0.0229931
B3	20	VEGFA	0.258379	0.0502212
B3	21	VEGFA	0.307757	0.0988289
B3	22	VEGFA	0.395739	0.186042
B3	23	VEGFA	0.530669	0.320202
B3	24	VEGFA	0.708427	0.49719
B3	25	VEGFA	0.899397	0.68739
B3	26	VEGFA	1.06444	0.851665
B3	27	VEGFA	1.18602	0.972477
B3	28	VEGFA	1.27146	1.05714
B3	29	VEGFA	1.33139	1.11631
B3	30	VEGFA	1.37545	1.1596
B3	31	VEGFA	1.40523	1.18861
B3	32	VEGFA	1.42885	1.21145
B3	33	VEGFA	1.44926	1.2311
B3	34	VEGFA	1.46606	1.24712
B3	35	VEGFA	1.47234	1.25264
B3	36	VEGFA	1.48019	1.25972
B3	37	VEGFA	1.49225	1.271
B3	38	VEGFA	1.49734	1.27533
B3	39	VEGFA	1.4967	1.27391
B3	40	VEGFA	1.5007	1.27715
B3	41	VEGFA	1.50088	1.27655
B3	42	VEGFA	1.5022	1.27711
B3	43	VEGFA	1.49994	1.27408
B3	44	VEGFA	1.49925	1.27261
B3	45	VEGFA	1.50358	1.27618
B4	1	JUN	0.181083	0.00480487
B4	2	JUN	0.178235	0.00145469
B4	3	JUN	0.179077	0.00179439
B4	4	JUN	0.178517	0.000732427
B4	5	JUN	0.177991	-0.000296008
B4	6	JUN	0.179528	0.000738817
B4	7	JUN	0.17863	-0.00066097
B4	8	JUN	0.1802	0.000406577
B4	9	JUN	0.180661	0.000365702
B4	10	JUN	0.180499	-0.00029764
B4	11	JUN	0.1816	0.000300759
B4	12	JUN	0.181272	-0.000528924
B4	13	JUN	0.182087	-0.000216463
B4	14	JUN	0.181729	-0.00107619
B4	15	JUN	0.181684	-0.00162363
B4	16	JUN	0.182178	-0.00163182
B4	17	JUN	0.182296	-0.00201611
B4	18	JUN	0.183774	-0.00103937
B4	19	JUN	0.184106	-0.00120983
B4	20	JUN	0.185625	-0.000193094
B4	21	JUN	0.187243	0.000922643
B4	22	JUN	0.192351	0.00552874
B4	23	JUN	0.201733	0.0144087
B4	24	JUN	0.217283	0.0294563
B4	25	JUN	0.247664	0.059336
B4	26	JUN	0.301399	0.112569
B4	27	JUN	0.393414	0.204081
B4	28	JUN	0.531739	0.341905
B4	29	JUN	0.707967	0.51763
B4	30	JUN	0.891107	0.700269
B4	31	JUN	1.04805	0.85671
B4	32	JUN	1.16578	0.973935
B4	33	JUN	1.25658	1.06423
B4	34	JUN	1.32076	1.12791
B4	35	JUN	1.36557	1.17222
B4	36	JUN	1.40249	1.20864
B4	37	JUN	1.43215	1.2378
B4	38	JUN	1.453	1.25814
B4	39	JUN	1.46882	1.27346
B4	40	JUN	1.48488	1.28902
B4	41	JUN	1.49862	1.30225
B4	42	JUN	1.50796	1.3111
B4	43	JUN	1.51332	1.31595
B4	44	JUN	1.52146	1.3236
B4	45	JUN	1.53088	1.33251
B5	1	JUN	0.193097	0.000584392
B5	2	JUN	0.19081	-0.00235129
B5	3	JUN	0.192939	-0.000871811
B5	4	JUN	0.194324	-0.000136171
B5	5	JUN	0.195637	0.000528331
B5	6	JUN	0.196015	0.000257442
B5	7	JUN	0.198016	0.00160899
B5	8	JUN	0.197909	0.000852533
B5	9	JUN	0.198399	0.000693507
B5	10	JUN	0.198532	0.0001773
B5	11	JUN	0.19931	0.000306403
B5	12	JUN	0.199954	0.000301425
B5	13	JUN	0.200961	0.000658575
B5	14	JUN	0.199532	-0.00141933
B5	15	JUN	0.199874	-0.00172645
B5	16	JUN	0.201216	-0.00103329
B5	17	JUN	0.200278	-0.00262089
B5	18	JUN	0.202118	-0.00142999
B5	19	JUN	0.202804	-0.00139307
B5	20	JUN	0.203739	-0.00110689
B5	21	JUN	0.206741	0.00124637
B5	22	JUN	0.211251	0.00510701
B5	23	JUN	0.217851	0.0110575
B5	24	JUN	0.231657	0.0242143
B5	25	JUN	0.259085	0.050994
B5	26	JUN	0.308197	0.0994569
B5	27	JUN	0.392758	0.183369
B5	28	JUN	0.523386	0.313347
B5	29	JUN	0.698354	0.487666
B5	30	JUN	0.886383	0.675046
B5	31	JUN	1.0484	0.836411
B5	32	JUN	1.17691	0.964273
B5	33	JUN	1.27535	1.06206
B5	34	JUN	1.34496	1.13103
B5	35	JUN	1.39252	1.17794
B5	36	JUN	1.43051	1.21528
B5	37	JUN	1.46187	1.24599
B5	38	JUN	1.4864	1.26987
B5	39	JUN	1.50115	1.28397
B5	40	JUN	1.51605	1.29822
B5	41	JUN	1.53293	1.31446
B5	42	JUN	1.54261	1.32348
B5	43	JUN	1.54861	1.32884
B5	44	JUN	1.5559	1.33547
B5	45	JUN	1.56437	1.3433
B6	1	JUN	0.179639	0.00239676
B6	2	JUN	0.176209	-0.00142826
B6	3	JUN	0.177721	-0.000310987
B6	4	JUN	0.177684	-0.000742197
B6	5	JUN	0.178451	-0.000370175
B6	6	JUN	0.179278	6.15709e-05
B6	7	JUN	0.180536	0.000924691
B6	8	JUN	0.180305	0.000299587
B6	9	JUN	0.181032	0.000631659
B6	10	JUN	0.182206	0.00141089
B6	11	JUN	0.181695	0.000504686
B6	12	JUN	0.181116	-0.00046848
B6	13	JUN	0.182082	0.000102503
B6	14	JUN	0.182352	-2.24884e-05
B6	15	JUN	0.181675	-0.0010944
B6	16	JUN	0.183261	9.65714e-05
B6	17	JUN	0.182897	-0.000661779
B6	18	JUN	0.183253	-0.000700462
B6	19	JUN	0.183016	-0.0013322
B6	20	JUN	0.183298	-0.00144513
B6	21	JUN	0.184977	-0.000160967
B6	22	JUN	0.18881	0.00327712
B6	23	JUN	0.195063	0.00913491
B6	24	JUN	0.206357	0.0200347
B6	25	JUN	0.229235	0.0425177
B6	26	JUN	0.269073	0.0819606
B6	27	JUN	0.342915	0.155408
B6	28	JUN	0.458286	0.270384
B6	29	JUN	0.619822	0.431525
B6	30	JUN	0.808131	0.61944
B6	31	JUN	0.979016	0.78993
B6	32	JUN	1.11916	0.929675
B6	33	JUN	1.22625	1.03638
B6	34	JUN	1.30485	1.11458
B6	35	JUN	1.35793	1.16726
B6	36	JUN	1.39771	1.20665
B6	37	JUN	1.43355	1.24209
B6	38	JUN	1.45823	1.26638
B6	39	JUN	1.47536	1.28312
B6	40	JUN	1.49162	1.29898
B6	41	JUN	1.50773	1.31469
B6	42	JUN	1.51792	1.32449
B6	43	JUN	1.52499	1.33117
B6	44	JUN	1.53521	1.34099
B6	45	JUN	1.54259	1.34797
B7	1	MAPK3	0.171782	0.00559381
B7	2	MAPK3	0.168192	0.00140428
B7	3	MAPK3	0.168372	0.000984228
B7	4	MAPK3	0.169625	0.00163705
B7	5	MAPK3	0.168738	0.000149568
B7	6	MAPK3	0.169879	0.000690324
B7	7	MAPK3	0.170434	0.000645031
B7	8	MAPK3	0.170228	-0.000161055
B7	9	MAPK3	0.170581	-0.000408184
B7	10	MAPK3	0.171267	-0.000322302
B7	11	MAPK3	0.170982	-0.00120753
B7	12	MAPK3	0.170597	-0.00219179
B7	13	MAPK3	0.17103	-0.00235978
B7	14	MAPK3	0.171655	-0.00233469
B7	15	MAPK3	0.172894	-0.00169571
B7	16	MAPK3	0.174902	-0.000287421
B7	17	MAPK3	0.17705	0.00125985
B7	18	MAPK3	0.181992	0.0056024
B7	19	MAPK3	0.190107	0.0131167
B7	20	MAPK3	0.206619	0.0290292
B7	21	MAPK3	0.236106	0.057916
B7	22	MAPK3	0.289843	0.111052
B7	23	MAPK3	0.382302	0.202912
B7	24	MAPK3	0.519568	0.339577
B7	25	MAPK3	0.694929	0.514338
B7	26	MAPK3	0.875472	0.694281
B7	27	MAPK3	1.02977	0.847979
B7	28	MAPK3	1.14643	0.964035
B7	29	MAPK3	1.23736	1.05437
B7	30	MAPK3	1.30253	1.11894
B7	31	MAPK3	1.34693	1.16274
B7	32	MAPK3	1.38052	1.19573
B7	33	MAPK3	1.40713	1.22174
B7	34	MAPK3	1.43135	1.24536
B7	35	MAPK3	1.4463	1.25971
B7	36	MAPK3	1.45789	1.27069
B7	37	MAPK3	1.47121	1.28342
B7	38	MAPK3	1.47929	1.29089
B7	39	MAPK3	1.48478	1.29579
B7	40	MAPK3	1.48935	1.29975
B7	41	MAPK3	1.49573	1.30553
B7	42	MAPK3	1.50201	1.31122
B7	43	MAPK3	1.50285	1.31146
B7	44	MAPK3	1.50864	1.31664
B7	45	MAPK3	1.50793	1.31534
B8	1	MAPK3	0.176407	0.0044253
B8	2	MAPK3	0.174406	0.00192142
B8	3	MAPK3	0.17364	0.000653081
B8	4	MAPK3	0.174374	0.000884338
B8	5	MAPK3	0.175233	0.00124045
B8	6	MAPK3	0.176121	0.00162564
B8	7	MAPK3	0.174987	-1.04754e-05
B8	8	MAPK3	0.175107	-0.000392938
B8	9	MAPK3	0.175929	-7.34664e-05
B8	10	MAPK3	0.175247	-0.00125842
B8	11	MAPK3	0.175335	-0.00167254
B8	12	MAPK3	0.17596	-0.00155065
B8	13	MAPK3	0.176561	-0.00145167
B8	14	MAPK3	0.176487	-0.00202846
B8	15	MAPK3	0.177277	-0.0017408
B8	16	MAPK3	0.177972	-0.00154873
B8	17	MAPK3	0.18169	0.00166639
B8	18	MAPK3	0.186184	0.00565824
B8	19	MAPK3	0.193776	0.0127471
B8	20	MAPK3	0.210054	0.0285228
B8	21	MAPK3	0.238291	0.056257
B8	22	MAPK3	0.292097	0.109561
B8	23	MAPK3	0.38144	0.198401
B8	24	MAPK3	0.518563	0.335021
B8	25	MAPK3	0.69398	0.509936
B8	26	MAPK3	0.880637	0.696091
B8	27	MAPK3	1.03741	0.852358
B8	28	MAPK3	1.1579	0.972344
B8	29	MAPK3	1.24879	1.06273
B8	30	MAPK3	1.31516	1.1286
B8	31	MAPK3	1.35932	1.17226
B8	32	MAPK3	1.39275	1.20519
B8	33	MAPK3	1.42266	1.23459
B8	34	MAPK3	1.44489	1.25632
B8	35	MAPK3	1.45916	1.27009
B8	36	MAPK3	1.46995	1.28037
B8	37	MAPK3	1.48307	1.293
B8	38	MAPK3	1.4934	1.30282
B8	39	MAPK3	1.49609	1.30501
B8	40	MAPK3	1.50216	1.31057
B8	41	MAPK3	1.50724	1.31516
B8	42	MAPK3	1.51019	1.3176
B8	43	MAPK3	1.51064	1.31755
B8	44	MAPK3	1.51458	1.32098
B8	45	MAPK3	1.5171	1.323
B9	1	MAPK3	0.171463	0.00455855
B9	2	MAPK3	0.169138	0.00163004
B9	3	MAPK3	0.169728	0.00161627
B9	4	MAPK3	0.169641	0.000925589
B9	5	MAPK3	0.169214	-0.000104439
B9	6	MAPK3	0.170983	0.00106068
B9	7	MAPK3	0.169747	-0.000778642
B9	8	MAPK3	0.170837	-0.000292342
B9	9	MAPK3	0.17152	-0.000213485
B9	10	MAPK3	0.171656	-0.000680771
B9	11	MAPK3	0.172174	-0.000766244
B9	12	MAPK3	0.172511	-0.0010322
B9	13	MAPK3	0.172868	-0.00127937
B9	14	MAPK3	0.172745	-0.00200565
B9	15	MAPK3	0.174472	-0.000881936
B9	16	MAPK3	0.174979	-0.0009786
B9	17	MAPK3	0.177424	0.000862513
B9	18	MAPK3	0.181714	0.00454861
B9	19	MAPK3	0.191079	0.0133108
B9	20	MAPK3	0.207323	0.0289511
B9	21	MAPK3	0.23765	0.0586748
B9	22	MAPK3	0.292177	0.112597
B9	23	MAPK3	0.384188	0.204005
B9	24	MAPK3	0.522688	0.341902
B9	25	MAPK3	0.701419	0.52003
B9	26	MAPK3	0.887356	0.705362
B9	27	MAPK3	1.04754	0.864948
B9	28	MAPK3	1.17079	0.987585
B9	29	MAPK3	1.25978	1.07598
B9	30	MAPK3	1.3261	1.14169
B9	31	MAPK3	1.37262	1.18761
B9	32	MAPK3	1.40692	1.2213
B9	33	MAPK3	1.43346	1.24724
B9	34	MAPK3	1.45851	1.27169
B9	35	MAPK3	1.47374	1.28631
B9	36	MAPK3	1.48649	1.29846
B9	37	MAPK3	1.50003	1.3114
B9	38	MAPK3	1.51132	1.32208
B9	39	MAPK3	1.51568	1.32584
B9	40	MAPK3	1.51943	1.32899
B9	41	MAPK3	1.52881	1.33777
B9	42	MAPK3	1.52956	1.33791
B9	43	MAPK3	1.53053	1.33828
B9	44	MAPK3	1.53312	1.34026
B9	45	MAPK3	1.53525	1.34179
B10	1	IL-6	0.173083	0.0072293
B10	2	IL-6	0.16902	0.00265155
B10	3	IL-6	0.167757	0.000874398
B10	4	IL-6	0.169043	0.00164558
B10	5	IL-6	0.16821	0.00029779
B10	6	IL-6	0.169161	0.000734069
B10	7	IL-6	0.169567	0.000625607
B10	8	IL-6	0.169389	-6.69056e-05
B10	9	IL-6	0.169583	-0.000386726
B10	10	IL-6	0.170252	-0.000232435
B10	11	IL-6	0.170736	-0.000263098
B10	12	IL-6	0.170931	-0.000583172
B10	13	IL-6	0.171637	-0.000391554
B10	14	IL-6	0.172385	-0.000158035
B10	15	IL-6	0.171606	-0.00145086
B10	16	IL-6	0.172895	-0.000677005
B10	17	IL-6	0.172564	-0.00152243
B10	18	IL-6	0.174343	-0.000257843
B10	19	IL-6	0.173582	-0.00153295
B10	20	IL-6	0.174415	-0.00121507
B10	21	IL-6	0.174937	-0.00120722
B10	22	IL-6	0.175561	-0.00109819
B10	23	IL-6	0.177036	-0.000137215
B10	24	IL-6	0.1795	0.00181207
B10	25	IL-6	0.183394	0.00519119
B10	26	IL-6	0.191616	0.0128993
B10	27	IL-6	0.209702	0.0304705
B10	28	IL-6	0.241086	0.0613403
B10	29	IL-6	0.298646	0.118385
B10	30	IL-6	0.400263	0.219488
B10	31	IL-6	0.562174	0.380884
B10	32	IL-6	0.774042	0.592238
B10	33	IL-6	0.999996	0.817678
B10	34	IL-6	1.18122	0.998386
B10	35	IL-6	1.28063	1.09729
B10	36	IL-6	1.34061	1.15675
B10	37	IL-6	1.38626	1.20188
B10	38	IL-6	1.41879	1.2339
B10	39	IL-6	1.43958	1.25417
B10	40	IL-6	1.45977	1.27385
B10	41	IL-6	1.47921	1.29278
B10	42	IL-6	1.49234	1.30539
B10	43	IL-6	1.5014	1.31394
B10	44	IL-6	1.5137	1.32572
B10	45	IL-6	1.52428	1.33579
B11	1	IL-6	0.193996	0.00300363
B11	2	IL-6	0.191577	-1.58543e-05
B11	3	IL-6	0.192756	0.000563116
B11	4	IL-6	0.192649	-0.000144108
B11	5	IL-6	0.192882	-0.000511318
B11	6	IL-6	0.194305	0.000311912
B11	7	IL-6	0.1951	0.000506194
B11	8	IL-6	0.195486	0.000292422
B11	9	IL-6	0.195929	0.000135527
B11	10	IL-6	0.196815	0.000420736
B11	11	IL-6	0.198024	0.00102948
B11	12	IL-6	0.197422	-0.000171973
B11	13	IL-6	0.199386	0.00119114
B11	14	IL-6	0.198976	0.000181617
B11	15	IL-6	0.198406	-0.00098942
B11	16	IL-6	0.20008	8.49984e-05
B11	17	IL-6	0.19946	-0.00113573
B11	18	IL-6	0.200189	-0.0010063
B11	19	IL-6	0.199717	-0.00207902
B11	20	IL-6	0.2013	-0.00109543
B11	21	IL-6	0.202103	-0.000892592
B11	22	IL-6	0.200977	-0.00261903
B11	23	IL-6	0.202787	-0.00140921
B11	24	IL-6	0.20616	0.00136344
B11	25	IL-6	0.21137	0.00597355
B11	26	IL-6	0.219187	0.0131905
B11	27	IL-6	0.236294	0.0296965
B11	28	IL-6	0.268322	0.061125
B11	29	IL-6	0.326385	0.118587
B11	30	IL-6	0.428943	0.220545
B11	31	IL-6	0.591543	0.382545
B11	32	IL-6	0.805288	0.59569
B11	33	IL-6	1.0265	0.816302
B11	34	IL-6	1.19704	0.986238
B11	35	IL-6	1.29378	1.08238
B11	36	IL-6	1.3546	1.14261
B11	37	IL-6	1.39585	1.18326
B11	38	IL-6	1.43009	1.21689
B11	39	IL-6	1.44842	1.23463
B11	40	IL-6	1.47384	1.25944
B11	41	IL-6	1.48726	1.27226
B11	42	IL-6	1.50241	1.28681
B11	43	IL-6	1.51467	1.29847
B11	44	IL-6	1.52838	1.31158
B11	45	IL-6	1.53548	1.31808
B12	1	IL-6	0.220646	0.00434676
B12	2	IL-6	0.217318	0.00049631
B12	3	IL-6	0.217736	0.000391777
B12	4	IL-6	0.217375	-0.000491565
B12	5	IL-6	0.217893	-0.000495648
B12	6	IL-6	0.21738	-0.00153064
B12	7	IL-6	0.219143	-0.000290581
B12	8	IL-6	0.221023	0.00106745
B12	9	IL-6	0.22156	0.00108263
B12	10	IL-6	0.220917	-8.32938e-05
B12	11	IL-6	0.221386	-0.000136567
B12	12	IL-6	0.222747	0.000702338
B12	13	IL-6	0.222589	2.21138e-05
B12	14	IL-6	0.223539	0.000449448
B12	15	IL-6	0.225123	0.00151133
B12	16	IL-6	0.224539	0.000404251
B12	17	IL-6	0.223723	-0.000933174
B12	18	IL-6	0.225378	0.000198687
B12	19	IL-6	0.225978	0.000277066
B12	20	IL-6	0.225453	-0.000770516
B12	21	IL-6	0.223758	-0.00298777
B12	22	IL-6	0.226635	-0.000633383
B12	23	IL-6	0.228191	0.000400518
B12	24	IL-6	0.230159	0.00184551
B12	25	IL-6	0.236626	0.00779018
B12	26	IL-6	0.247633	0.0182756
B12	27	IL-6	0.264546	0.0346659
B12	28	IL-6	0.302259	0.0718568
B12	29	IL-6	0.37251	0.141585
B12	30	IL-6	0.486285	0.254838
B12	31	IL-6	0.659493	0.427524
B12	32	IL-6	0.878464	0.645972
B12	33	IL-6	1.08589	0.85288
B12	34	IL-6	1.23556	1.00202
B12	35	IL-6	1.31594	1.08188
B12	36	IL-6	1.3688	1.13422
B12	37	IL-6	1.40868	1.17358
B12	38	IL-6	1.43833	1.2027
B12	39	IL-6	1.45677	1.22062
B12	40	IL-6	1.47771	1.24104
B12	41	IL-6	1.49781	1.26062
B12	42	IL-6	1.5091	1.27139
B12	43	IL-6	1.51802	1.27978
B12	44	IL-6	1.53045	1.29169
B12	45	IL-6	1.54331	1.30403
C1	1	VEGFA	0.342709	0.00806841
C1	2	VEGFA	0.339881	0.0029027
C1	3	VEGFA	0.339836	0.000519779
C1	4	VEGFA	0.342115	0.000460546
C1	5	VEGFA	0.344595	0.000602508
C1	6	VEGFA	0.345939	-0.000392279
C1	7	VEGFA	0.348075	-0.000594384
C1	8	VEGFA	0.349658	-0.00134947
C1	9	VEGFA	0.354366	0.00102016
C1	10	VEGFA	0.355973	0.000288969
C1	11	VEGFA	0.357574	-0.000447968
C1	12	VEGFA	0.361158	0.000798379
C1	13	VEGFA	0.361474	-0.00122369
C1	14	VEGFA	0.364281	-0.000755396
C1	15	VEGFA	0.365945	-0.00142903
C1	16	VEGFA	0.370153	0.000440986
C1	17	VEGFA	0.374111	0.00206091
C1	18	VEGFA	0.3813	0.00691158
C1	19	VEGFA	0.39613	0.0194031
C1	20	VEGFA	0.423262	0.044197
C1	21	VEGFA	0.471248	0.0898453
C1	22	VEGFA	0.556849	0.173108
C1	23	VEGFA	0.68765	0.301571
C1	24	VEGFA	0.864695	0.476277
C1	25	VEGFA	1.05674	0.665983
C1	26	VEGFA	1.23055	0.837459
C1	27	VEGFA	1.35358	0.958147
C1	28	VEGFA	1.44134	1.04357
C1	29	VEGFA	1.50489	1.10478
C1	30	VEGFA	1.55168	1.14923
C1	31	VEGFA	1.58202	1.17724
C1	32	VEGFA	1.60704	1.19992
C1	33	VEGFA	1.62618	1.21672
C1	34	VEGFA	1.64109	1.22929
C1	35	VEGFA	1.65472	1.24059
C1	36	VEGFA	1.66491	1.24843
C1	37	VEGFA	1.67108	1.25227
C1	38	VEGFA	1.67922	1.25806
C1	39	VEGFA	1.67922	1.25573
C1	40	VEGFA	1.68201	1.25619
C1	41	VEGFA	1.68488	1.25672
C1	42	VEGFA	1.68217	1.25167
C1	43	VEGFA	1.68196	1.24912
C1	44	VEGFA	1.68567	1.25049
C1	45	VEGFA	1.68497	1.24745
C2	1	VEGFA	0.219038	0.00450916
C2	2	VEGFA	0.217013	0.00185186
C2	3	VEGFA	0.21692	0.00112649
C2	4	VEGFA	0.215441	-0.000985296
C2	5	VEGFA	0.218097	0.0010379
C2	6	VEGFA	0.218661	0.000968759
C2	7	VEGFA	0.21897	0.000645087
C2	8	VEGFA	0.218461	-0.000496257
C2	9	VEGFA	0.219885	0.000295199
C2	10	VEGFA	0.220594	0.00037125
C2	11	VEGFA	0.219066	-0.0017895
C2	12	VEGFA	0.220195	-0.00129358
C2	13	VEGFA	0.219217	-0.00290389
C2	14	VEGFA	0.221712	-0.00104144
C2	15	VEGFA	0.221835	-0.00155169
C2	16	VEGFA	0.226049	0.00203004
C2	17	VEGFA	0.228239	0.00358692
C2	18	VEGFA	0.234931	0.00964638
C2	19	VEGFA	0.248781	0.022864
C2	20	VEGFA	0.275804	0.0492545
C2	21	VEGFA	0.324009	0.0968269
C2	22	VEGFA	0.409159	0.181343
C2	23	VEGFA	0.543595	0.315147
C2	24	VEGFA	0.720739	0.491659
C2	25	VEGFA	0.910558	0.680844
C2	26	VEGFA	1.08182	0.851475
C2	27	VEGFA	1.20315	0.972169
C2	28	VEGFA	1.29598	1.06437
C2	29	VEGFA	1.35623	1.12399
C2	30	VEGFA	1.39928	1.1664
C2	31	VEGFA	1.43236	1.19885
C2	32	VEGFA	1.45387	1.21973
C2	33	VEGFA	1.47413	1.23936
C2	34	VEGFA	1.48627	1.25086
C2	35	VEGFA	1.49764	1.2616
C2	36	VEGFA	1.50785	1.27117
C2	37	VEGFA	1.51631	1.279
C2	38	VEGFA	1.52268	1.28474
C2	39	VEGFA	1.51995	1.28138
C2	40	VEGFA	1.5261	1.2869
C2	41	VEGFA	1.52468	1.28485
C2	42	VEGFA	1.52744	1.28697
C2	43	VEGFA	1.53002	1.28892
C2	44	VEGFA	1.52869	1.28696
C2	45	VEGFA	1.53349	1.29113
C3	1	VEGFA	0.181006	0.00195273
C3	2	VEGFA	0.179717	0.000100774
C3	3	VEGFA	0.180918	0.000739187
C3	4	VEGFA	0.18081	6.94133e-05
C3	5	VEGFA	0.181948	0.000643871
C3	6	VEGFA	0.182328	0.000462036
C3	7	VEGFA	0.182467	3.79521e-05
C3	8	VEGFA	0.182443	-0.000548837
C3	9	VEGFA	0.183766	0.000211617
C3	10	VEGFA	0.183848	-0.000269106
C3	11	VEGFA	0.183654	-0.00102498
C3	12	VEGFA	0.18496	-0.000281512
C3	13	VEGFA	0.184541	-0.00126312
C3	14	VEGFA	0.18501	-0.00135725
C3	15	VEGFA	0.185758	-0.00117155
C3	16	VEGFA	0.187208	-0.000284255
C3	17	VEGFA	0.192091	0.00403653
C3	18	VEGFA	0.197778	0.00916075
C3	19	VEGFA	0.213197	0.024017
C3	20	VEGFA	0.239042	0.0492995
C3	21	VEGFA	0.286521	0.0962158
C3	22	VEGFA	0.372544	0.181677
C3	23	VEGFA	0.505754	0.314324
C3	24	VEGFA	0.681665	0.489672
C3	25	VEGFA	0.870921	0.678366
C3	26	VEGFA	1.03737	0.844248
C3	27	VEGFA	1.15972	0.966035
C3	28	VEGFA	1.2446	1.05035
C3	29	VEGFA	1.30354	1.10873
C3	30	VEGFA	1.35146	1.15609
C3	31	VEGFA	1.38173	1.18579
C3	32	VEGFA	1.40233	1.20583
C3	33	VEGFA	1.41962	1.22256
C3	34	VEGFA	1.43825	1.24063
C3	35	VEGFA	1.44731	1.24913
C3	36	VEGFA	1.45389	1.25515
C3	37	VEGFA	1.4632	1.26389
C3	38	VEGFA	1.46754	1.26767
C3	39	VEGFA	1.46686	1.26643
C3	40	VEGFA	1.47022	1.26923
C3	41	VEGFA	1.47357	1.27201
C3	42	VEGFA	1.47507	1.27295
C3	43	VEGFA	1.47345	1.27077
C3	44	VEGFA	1.4749	1.27165
C3	45	VEGFA	1.47597	1.27216
C4	1	JUN	0.188063	0.00451765
C4	2	JUN	0.184801	0.000621457
C4	3	JUN	0.185265	0.000450239
C4	4	JUN	0.185092	-0.000356722
C4	5	JUN	0.186201	0.000118011
C4	6	JUN	0.186947	0.000229915
C4	7	JUN	0.188662	0.00130995
C4	8	JUN	0.188331	0.000345213
C4	9	JUN	0.188849	0.000228206
C4	10	JUN	0.189415	0.000159791
C4	11	JUN	0.189002	-0.00088754
C4	12	JUN	0.190071	-0.000452877
C4	13	JUN	0.190638	-0.000519637
C4	14	JUN	0.191064	-0.000728272
C4	15	JUN	0.192464	3.71822e-05
C4	16	JUN	0.192006	-0.00105502
C4	17	JUN	0.192578	-0.00111728
C4	18	JUN	0.193105	-0.00122469
C4	19	JUN	0.195117	0.000152325
C4	20	JUN	0.195995	0.000396685
C4	21	JUN	0.199148	0.00291452
C4	22	JUN	0.205054	0.00818666
C4	23	JUN	0.217403	0.0199011
C4	24	JUN	0.237931	0.039795
C4	25	JUN	0.279658	0.0808877
C4	26	JUN	0.348754	0.149349
C4	27	JUN	0.461824	0.261785
C4	28	JUN	0.616953	0.416279
C4	29	JUN	0.799506	0.598198
C4	30	JUN	0.970695	0.768752
C4	31	JUN	1.10733	0.904756
C4	32	JUN	1.20855	1.00534
C4	33	JUN	1.28589	1.08204
C4	34	JUN	1.34489	1.14041
C4	35	JUN	1.38317	1.17806
C4	36	JUN	1.41577	1.21002
C4	37	JUN	1.44319	1.23681
C4	38	JUN	1.46317	1.25615
C4	39	JUN	1.47367	1.26602
C4	40	JUN	1.48926	1.28098
C4	41	JUN	1.50217	1.29325
C4	42	JUN	1.51181	1.30225
C4	43	JUN	1.51641	1.30622
C4	44	JUN	1.52578	1.31495
C4	45	JUN	1.53158	1.32012
C5	1	JUN	0.169831	0.00418003
C5	2	JUN	0.167944	0.00163684
C5	3	JUN	0.168444	0.00148177
C5	4	JUN	0.168166	0.00054735
C5	5	JUN	0.169224	0.000949789
C5	6	JUN	0.169392	0.000461884
C5	7	JUN	0.170197	0.000611525
C5	8	JUN	0.169794	-0.000447988
C5	9	JUN	0.170814	-8.35319e-05
C5	10	JUN	0.171786	0.000233002
C5	11	JUN	0.17219	-1.91514e-05
C5	12	JUN	0.171095	-0.00177033
C5	13	JUN	0.172996	-0.000525172
C5	14	JUN	0.173389	-0.000787042
C5	15	JUN	0.17286	-0.00197186
C5	16	JUN	0.173782	-0.00170644
C5	17	JUN	0.175137	-0.00100661
C5	18	JUN	0.175325	-0.00147451
C5	19	JUN	0.176722	-0.000733841
C5	20	JUN	0.177413	-0.000698044
C5	21	JUN	0.180121	0.00135361
C5	22	JUN	0.185009	0.00558559
C5	23	JUN	0.194407	0.0143283
C5	24	JUN	0.212502	0.0317676
C5	25	JUN	0.246391	0.0650002
C5	26	JUN	0.303051	0.121005
C5	27	JUN	0.40057	0.217868
C5	28	JUN	0.544118	0.36076
C5	29	JUN	0.7207	0.536686
C5	30	JUN	0.901062	0.716393
C5	31	JUN	1.04983	0.864505
C5	32	JUN	1.16421	0.978227
C5	33	JUN	1.25038	1.06375
C5	34	JUN	1.31272	1.12543
C5	35	JUN	1.35618	1.16823
C5	36	JUN	1.39231	1.2037
C5	37	JUN	1.41966	1.2304
C5	38	JUN	1.44279	1.25287
C5	39	JUN	1.45743	1.26686
C5	40	JUN	1.47174	1.28051
C5	41	JUN	1.48616	1.29428
C5	42	JUN	1.49505	1.30251
C5	43	JUN	1.50022	1.30702
C5	44	JUN	1.50918	1.31533
C5	45	JUN	1.51524	1.32074
C6	1	JUN	0.173127	0.00181623
C6	2	JUN	0.17287	0.000926094
C6	3	JUN	0.172401	-0.000175463
C6	4	JUN	0.17323	2.04693e-05
C6	5	JUN	0.174121	0.000278718
C6	6	JUN	0.174642	0.000167105
C6	7	JUN	0.176529	0.00142081
C6	8	JUN	0.175957	0.000216287
C6	9	JUN	0.177024	0.00065022
C6	10	JUN	0.17667	-0.000336404
C6	11	JUN	0.177881	0.000241504
C6	12	JUN	0.178101	-0.000171396
C6	13	JUN	0.178337	-0.000568515
C6	14	JUN	0.17987	0.000331914
C6	15	JUN	0.178909	-0.00126161
C6	16	JUN	0.179623	-0.00118068
C6	17	JUN	0.180329	-0.00110758
C6	18	JUN	0.180244	-0.0018253
C6	19	JUN	0.181919	-0.000783619
C6	20	JUN	0.18293	-0.000405551
C6	21	JUN	0.1842	0.000232395
C6	22	JUN	0.188858	0.00425669
C6	23	JUN	0.196846	0.0116126
C6	24	JUN	0.21319	0.027323
C6	25	JUN	0.241872	0.0553727
C6	26	JUN	0.294745	0.107613
C6	27	JUN	0.386466	0.198701
C6	28	JUN	0.520177	0.331779
C6	29	JUN	0.69385	0.504819
C6	30	JUN	0.873961	0.684297
C6	31	JUN	1.02453	0.834229
C6	32	JUN	1.14366	0.952734
C6	33	JUN	1.23395	1.04239
C6	34	JUN	1.29958	1.10738
C6	35	JUN	1.34562	1.15279
C6	36	JUN	1.383	1.18954
C6	37	JUN	1.4112	1.2171
C6	38	JUN	1.43429	1.23956
C6	39	JUN	1.45037	1.25501
C6	40	JUN	1.46342	1.26743
C6	41	JUN	1.47761	1.28098
C6	42	JUN	1.49103	1.29377
C6	43	JUN	1.4938	1.29591
C6	44	JUN	1.50046	1.30194
C6	45	JUN	1.50897	1.30982
C7	1	MAPK3	0.53376	0.0132149
C7	2	MAPK3	0.527308	0.00640072
C7	3	MAPK3	0.521638	0.000367866
C7	4	MAPK3	0.521672	4.0127e-05
C7	5	MAPK3	0.52076	-0.00123431
C7	6	MAPK3	0.520947	-0.0014094
C7	7	MAPK3	0.522868	0.000149105
C7	8	MAPK3	0.524138	0.00105745
C7	9	MAPK3	0.525444	0.00200131
C7	10	MAPK3	0.524394	0.000588948
C7	11	MAPK3	0.525796	0.00162872
C7	12	MAPK3	0.524684	0.000154125
C7	13	MAPK3	0.523756	-0.00113528
C7	14	MAPK3	0.523872	-0.00138148
C7	15	MAPK3	0.523569	-0.00204652
C7	16	MAPK3	0.524531	-0.0014474
C7	17	MAPK3	0.526192	-0.000147996
C7	18	MAPK3	0.529517	0.00281474
C7	19	MAPK3	0.537463	0.0103987
C7	20	MAPK3	0.555515	0.0280883
C7	21	MAPK3	0.588031	0.0602423
C7	22	MAPK3	0.648894	0.120742
C7	23	MAPK3	0.746335	0.217821
C7	24	MAPK3	0.891954	0.363079
C7	25	MAPK3	1.06634	0.537103
C7	26	MAPK3	1.23728	0.707681
C7	27	MAPK3	1.37334	0.843377
C7	28	MAPK3	1.47709	0.946763
C7	29	MAPK3	1.55656	1.02588
C7	30	MAPK3	1.61246	1.08141
C7	31	MAPK3	1.65255	1.12113
C7	32	MAPK3	1.68051	1.14874
C7	33	MAPK3	1.71024	1.1781
C7	34	MAPK3	1.7319	1.1994
C7	35	MAPK3	1.7387	1.20584
C7	36	MAPK3	1.74903	1.21581
C7	37	MAPK3	1.76137	1.22778
C7	38	MAPK3	1.77247	1.23852
C7	39	MAPK3	1.77778	1.24347
C7	40	MAPK3	1.78435	1.24968
C7	41	MAPK3	1.79172	1.25669
C7	42	MAPK3	1.79323	1.25783
C7	43	MAPK3	1.79259	1.25683
C7	44	MAPK3	1.79315	1.25703
C7	45	MAPK3	1.80153	1.26505
C8	1	MAPK3	0.176229	0.00262804
C8	2	MAPK3	0.174268	5.32224e-05
C8	3	MAPK3	0.174847	1.932e-05
C8	4	MAPK3	0.17655	0.0011101
C8	5	MAPK3	0.175731	-0.000322502
C8	6	MAPK3	0.176221	-0.000445544
C8	7	MAPK3	0.177541	0.000262185
C8	8	MAPK3	0.178725	0.000832882
C8	9	MAPK3	0.178444	-6.15326e-05
C8	10	MAPK3	0.177949	-0.00116938
C8	11	MAPK3	0.180065	0.000334238
C8	12	MAPK3	0.179773	-0.000570518
C8	13	MAPK3	0.18034	-0.000616625
C8	14	MAPK3	0.180799	-0.000770556
C8	15	MAPK3	0.181156	-0.00102656
C8	16	MAPK3	0.183104	0.000307821
C8	17	MAPK3	0.185525	0.00211667
C8	18	MAPK3	0.190046	0.0060241
C8	19	MAPK3	0.201085	0.0164508
C8	20	MAPK3	0.219796	0.0345487
C8	21	MAPK3	0.25307	0.0672097
C8	22	MAPK3	0.315543	0.129069
C8	23	MAPK3	0.417703	0.230617
C8	24	MAPK3	0.565493	0.377793
C8	25	MAPK3	0.744205	0.555893
C8	26	MAPK3	0.921872	0.732947
C8	27	MAPK3	1.06716	0.877621
C8	28	MAPK3	1.17766	0.987504
C8	29	MAPK3	1.26223	1.07147
C8	30	MAPK3	1.32305	1.13167
C8	31	MAPK3	1.36303	1.17104
C8	32	MAPK3	1.3941	1.20149
C8	33	MAPK3	1.42265	1.22944
C8	34	MAPK3	1.44245	1.24862
C8	35	MAPK3	1.45471	1.26027
C8	36	MAPK3	1.46784	1.27278
C8	37	MAPK3	1.48316	1.2875
C8	38	MAPK3	1.49337	1.29709
C8	39	MAPK3	1.49451	1.29762
C8	40	MAPK3	1.50141	1.3039
C8	41	MAPK3	1.51193	1.31381
C8	42	MAPK3	1.51044	1.3117
C8	43	MAPK3	1.51251	1.31317
C8	44	MAPK3	1.51528	1.31532
C8	45	MAPK3	1.51741	1.31683
C9	1	MAPK3	0.167722	0.0052144
C9	2	MAPK3	0.165579	0.00211586
C9	3	MAPK3	0.167019	0.00260023
C9	4	MAPK3	0.166597	0.00122236
C9	5	MAPK3	0.166663	0.000332795
C9	6	MAPK3	0.167841	0.000555336
C9	7	MAPK3	0.168228	-1.27493e-05
C9	8	MAPK3	0.168333	-0.00086342
C9	9	MAPK3	0.168339	-0.00181293
C9	10	MAPK3	0.170032	-0.00107593
C9	11	MAPK3	0.169485	-0.00257827
C9	12	MAPK3	0.173303	0.000283655
C9	13	MAPK3	0.173034	-0.000940587
C9	14	MAPK3	0.173269	-0.00166172
C9	15	MAPK3	0.1742	-0.00168566
C9	16	MAPK3	0.176041	-0.000800332
C9	17	MAPK3	0.178742	0.000944825
C9	18	MAPK3	0.184245	0.0054924
C9	19	MAPK3	0.19358	0.0138714
C9	20	MAPK3	0.211118	0.0304545
C9	21	MAPK3	0.245234	0.0636145
C9	22	MAPK3	0.305454	0.122879
C9	23	MAPK3	0.405819	0.222288
C9	24	MAPK3	0.550587	0.366101
C9	25	MAPK3	0.730419	0.544977
C9	26	MAPK3	0.90791	0.721512
C9	27	MAPK3	1.05402	0.86667
C9	28	MAPK3	1.16694	0.978627
C9	29	MAPK3	1.24814	1.05888
C9	30	MAPK3	1.30853	1.11831
C9	31	MAPK3	1.35377	1.16259
C9	32	MAPK3	1.38453	1.1924
C9	33	MAPK3	1.41458	1.22149
C9	34	MAPK3	1.43677	1.24273
C9	35	MAPK3	1.45078	1.25578
C9	36	MAPK3	1.46416	1.26821
C9	37	MAPK3	1.47723	1.28032
C9	38	MAPK3	1.48778	1.28992
C9	39	MAPK3	1.49013	1.29131
C9	40	MAPK3	1.49683	1.29705
C9	41	MAPK3	1.50269	1.30196
C9	42	MAPK3	1.50384	1.30215
C9	43	MAPK3	1.50473	1.30209
C9	44	MAPK3	1.50895	1.30535
C9	45	MAPK3	1.51163	1.30708
C10	1	IL-6	0.168303	0.00249328
C10	2	IL-6	0.16595	-0.000521931
C10	3	IL-6	0.167058	-7.71713e-05
C10	4	IL-6	0.166786	-0.00101221
C10	5	IL-6	0.167605	-0.000855419
C10	6	IL-6	0.16948	0.000357123
C10	7	IL-6	0.170434	0.000648401
C10	8	IL-6	0.17097	0.000522148
C10	9	IL-6	0.171966	0.000854628
C10	10	IL-6	0.172954	0.00118037
C10	11	IL-6	0.172435	-1.3148e-06
C10	12	IL-6	0.173557	0.000458331
C10	13	IL-6	0.173931	0.000169686
C10	14	IL-6	0.174414	-1.07027e-05
C10	15	IL-6	0.174895	-0.000191568
C10	16	IL-6	0.175783	3.36381e-05
C10	17	IL-6	0.175029	-0.00138352
C10	18	IL-6	0.176421	-0.00065337
C10	19	IL-6	0.176957	-0.0007808
C10	20	IL-6	0.177306	-0.00109418
C10	21	IL-6	0.179437	0.000373856
C10	22	IL-6	0.178863	-0.000862637
C10	23	IL-6	0.180058	-0.000330303
C10	24	IL-6	0.183706	0.00265502
C10	25	IL-6	0.188605	0.00689132
C10	26	IL-6	0.20079	0.0184137
C10	27	IL-6	0.222979	0.0399402
C10	28	IL-6	0.262295	0.0785932
C10	29	IL-6	0.333832	0.149468
C10	30	IL-6	0.456937	0.27191
C10	31	IL-6	0.638495	0.452806
C10	32	IL-6	0.856531	0.670179
C10	33	IL-6	1.06554	0.878528
C10	34	IL-6	1.20921	1.02153
C10	35	IL-6	1.28875	1.10041
C10	36	IL-6	1.34145	1.15245
C10	37	IL-6	1.37903	1.18937
C10	38	IL-6	1.409	1.21868
C10	39	IL-6	1.42627	1.23528
C10	40	IL-6	1.44749	1.25583
C10	41	IL-6	1.46569	1.27337
C10	42	IL-6	1.47597	1.283
C10	43	IL-6	1.48445	1.29081
C10	44	IL-6	1.50193	1.30763
C10	45	IL-6	1.50865	1.31368
C11	1	IL-6	0.1719	0.00273249
C11	2	IL-6	0.170192	0.000361633
C11	3	IL-6	0.17108	0.000586772
C11	4	IL-6	0.171734	0.000578082
C11	5	IL-6	0.171136	-0.000682916
C11	6	IL-6	0.172147	-0.000335454
C11	7	IL-6	0.173335	0.000190257
C11	8	IL-6	0.174056	0.000247847
C11	9	IL-6	0.175449	0.000977882
C11	10	IL-6	0.17422	-0.000914434
C11	11	IL-6	0.176924	0.00112695
C11	12	IL-6	0.176364	-9.64992e-05
C11	13	IL-6	0.17721	8.67228e-05
C11	14	IL-6	0.178038	0.000252004
C11	15	IL-6	0.17934	0.000890561
C11	16	IL-6	0.178853	-0.000259052
C11	17	IL-6	0.178796	-0.000979346
C11	18	IL-6	0.179357	-0.00108053
C11	19	IL-6	0.179563	-0.00153803
C11	20	IL-6	0.180196	-0.0015684
C11	21	IL-6	0.181523	-0.0009043
C11	22	IL-6	0.182254	-0.000836383
C11	23	IL-6	0.182878	-0.00087492
C11	24	IL-6	0.185267	0.000850736
C11	25	IL-6	0.189361	0.00428244
C11	26	IL-6	0.198319	0.0125776
C11	27	IL-6	0.21565	0.0292454
C11	28	IL-6	0.24898	0.0619118
C11	29	IL-6	0.309394	0.121663
C11	30	IL-6	0.412194	0.2238
C11	31	IL-6	0.574738	0.385681
C11	32	IL-6	0.788246	0.598526
C11	33	IL-6	1.00842	0.818034
C11	34	IL-6	1.18004	0.988998
C11	35	IL-6	1.27827	1.08656
C11	36	IL-6	1.33877	1.14639
C11	37	IL-6	1.38194	1.18891
C11	38	IL-6	1.41582	1.22212
C11	39	IL-6	1.43332	1.23895
C11	40	IL-6	1.45782	1.2628
C11	41	IL-6	1.47605	1.28036
C11	42	IL-6	1.48893	1.29258
C11	43	IL-6	1.49946	1.30245
C11	44	IL-6	1.5127	1.31503
C11	45	IL-6	1.52258	1.32424
C12	1	IL-6	0.204954	0.0032464
C12	2	IL-6	0.202543	0.000263513
C12	3	IL-6	0.20233	-0.000521584
C12	4	IL-6	0.204532	0.00110822
C12	5	IL-6	0.202575	-0.00142152
C12	6	IL-6	0.204192	-0.000376371
C12	7	IL-6	0.205542	0.000401142
C12	8	IL-6	0.207467	0.00175429
C12	9	IL-6	0.206058	-0.000227254
C12	10	IL-6	0.207068	0.000211108
C12	11	IL-6	0.208797	0.00136765
C12	12	IL-6	0.20787	-0.000131826
C12	13	IL-6	0.209648	0.0010743
C12	14	IL-6	0.209914	0.000767698
C12	15	IL-6	0.208384	-0.00133463
C12	16	IL-6	0.209292	-0.000998745
C12	17	IL-6	0.209801	-0.00106196
C12	18	IL-6	0.210639	-0.000796237
C12	19	IL-6	0.21072	-0.00128741
C12	20	IL-6	0.211054	-0.00152475
C12	21	IL-6	0.211687	-0.00146455
C12	22	IL-6	0.214104	0.000379898
C12	23	IL-6	0.215125	0.000828736
C12	24	IL-6	0.218122	0.00325381
C12	25	IL-6	0.223254	0.00781382
C12	26	IL-6	0.239154	0.0231414
C12	27	IL-6	0.259351	0.042766
C12	28	IL-6	0.302127	0.0849705
C12	29	IL-6	0.380553	0.162824
C12	30	IL-6	0.509853	0.291552
C12	31	IL-6	0.69786	0.478987
C12	32	IL-6	0.922507	0.703061
C12	33	IL-6	1.12623	0.906214
C12	34	IL-6	1.26455	1.04396
C12	35	IL-6	1.33598	1.11482
C12	36	IL-6	1.38419	1.16246
C12	37	IL-6	1.42531	1.203
C12	38	IL-6	1.45466	1.23178
C12	39	IL-6	1.47452	1.25107
C12	40	IL-6	1.49596	1.27193
C12	41	IL-6	1.5149	1.2903
C12	42	IL-6	1.52521	1.30004
C12	43	IL-6	1.53588	1.31014
C12	44	IL-6	1.54578	1.31947
C12	45	IL-6	1.55384	1.32696
D1	1	VEGFA	0.190677	0.00643129
D1	2	VEGFA	0.188816	0.00408365
D1	3	VEGFA	0.187383	0.00216416
D1	4	VEGFA	0.186497	0.000790701
D1	5	VEGFA	0.185693	-0.000499444
D1	6	VEGFA	0.18654	-0.000139137
D1	7	VEGFA	0.188059	0.00089293
D1	8	VEGFA	0.186873	-0.000780145
D1	9	VEGFA	0.188853	0.000713306
D1	10	VEGFA	0.187648	-0.000978962
D1	11	VEGFA	0.189054	-5.9339e-05
D1	12	VEGFA	0.186921	-0.00267922
D1	13	VEGFA	0.187186	-0.00290162
D1	14	VEGFA	0.188301	-0.00227363
D1	15	VEGFA	0.189962	-0.00109939
D1	16	VEGFA	0.192111	0.000563069
D1	17	VEGFA	0.198321	0.00628672
D1	18	VEGFA	0.205551	0.0130292
D1	19	VEGFA	0.221581	0.0285724
D1	20	VEGFA	0.253764	0.060269
D1	21	VEGFA	0.311784	0.117802
D1	22	VEGFA	0.408873	0.214404
D1	23	VEGFA	0.556557	0.361601
D1	24	VEGFA	0.747795	0.552352
D1	25	VEGFA	0.936207	0.740277
D1	26	VEGFA	1.0952	0.898785
D1	27	VEGFA	1.21086	1.01396
D1	28	VEGFA	1.29498	1.09759
D1	29	VEGFA	1.35015	1.15227
D1	30	VEGFA	1.38911	1.19074
D1	31	VEGFA	1.42136	1.22251
D1	32	VEGFA	1.44703	1.24769
D1	33	VEGFA	1.46155	1.26173
D1	34	VEGFA	1.47468	1.27437
D1	35	VEGFA	1.48493	1.28413
D1	36	VEGFA	1.49247	1.29119
D1	37	VEGFA	1.505	1.30323
D1	38	VEGFA	1.50503	1.30278
D1	39	VEGFA	1.51086	1.30811
D1	40	VEGFA	1.51402	1.31078
D1	41	VEGFA	1.51452	1.3108
D1	42	VEGFA	1.51648	1.31228
D1	43	VEGFA	1.51524	1.31055
D1	44	VEGFA	1.5129	1.30772
D1	45	VEGFA	1.51499	1.30932
D2	1	VEGFA	0.211533	0.00419655
D2	2	VEGFA	0.210426	0.00229624
D2	3	VEGFA	0.210044	0.0011202
D2	4	VEGFA	0.210836	0.00111793
D2	5	VEGFA	0.210069	-0.00044243
D2	6	VEGFA	0.210603	-0.000702584
D2	7	VEGFA	0.213738	0.00163821
D2	8	VEGFA	0.212627	-0.000266491
D2	9	VEGFA	0.213883	0.000195465
D2	10	VEGFA	0.213475	-0.00100558
D2	11	VEGFA	0.21504	-0.000235108
D2	12	VEGFA	0.214248	-0.00182074
D2	13	VEGFA	0.215074	-0.00178819
D2	14	VEGFA	0.215666	-0.00199045
D2	15	VEGFA	0.2172	-0.00125014
D2	16	VEGFA	0.219696	0.000452055
D2	17	VEGFA	0.225016	0.00497784
D2	18	VEGFA	0.230856	0.0100239
D2	19	VEGFA	0.248594	0.0269684
D2	20	VEGFA	0.2792	0.0567805
D2	21	VEGFA	0.336488	0.113275
D2	22	VEGFA	0.431303	0.207296
D2	23	VEGFA	0.578058	0.353256
D2	24	VEGFA	0.762589	0.536994
D2	25	VEGFA	0.948593	0.722203
D2	26	VEGFA	1.10451	0.877328
D2	27	VEGFA	1.22111	0.993131
D2	28	VEGFA	1.29858	1.06981
D2	29	VEGFA	1.35514	1.12557
D2	30	VEGFA	1.39743	1.16707
D2	31	VEGFA	1.42531	1.19416
D2	32	VEGFA	1.44594	1.21399
D2	33	VEGFA	1.46744	1.2347
D2	34	VEGFA	1.47867	1.24514
D2	35	VEGFA	1.48685	1.25253
D2	36	VEGFA	1.49738	1.26225
D2	37	VEGFA	1.50432	1.2684
D2	38	VEGFA	1.51051	1.2738
D2	39	VEGFA	1.51147	1.27397
D2	40	VEGFA	1.51393	1.27563
D2	41	VEGFA	1.51538	1.27629
D2	42	VEGFA	1.51552	1.27564
D2	43	VEGFA	1.51791	1.27723
D2	44	VEGFA	1.52066	1.27918
D2	45	VEGFA	1.52076	1.27849
D3	1	VEGFA	0.181312	0.00231232
D3	2	VEGFA	0.179783	0.000186659
D3	3	VEGFA	0.179764	-0.00042895
D3	4	VEGFA	0.182626	0.00183688
D3	5	VEGFA	0.181202	-0.000184208
D3	6	VEGFA	0.182563	0.000581014
D3	7	VEGFA	0.183313	0.000733769
D3	8	VEGFA	0.182962	-0.000213898
D3	9	VEGFA	0.183054	-0.000718642
D3	10	VEGFA	0.184725	0.000355883
D3	11	VEGFA	0.183595	-0.00137065
D3	12	VEGFA	0.185339	-0.000222902
D3	13	VEGFA	0.185542	-0.000616334
D3	14	VEGFA	0.183658	-0.00309708
D3	15	VEGFA	0.185148	-0.00220372
D3	16	VEGFA	0.189241	0.001293
D3	17	VEGFA	0.192801	0.00425583
D3	18	VEGFA	0.201531	0.0123892
D3	19	VEGFA	0.21774	0.0280022
D3	20	VEGFA	0.248716	0.0583807
D3	21	VEGFA	0.306071	0.11514
D3	22	VEGFA	0.403479	0.211951
D3	23	VEGFA	0.548581	0.356456
D3	24	VEGFA	0.734116	0.541395
D3	25	VEGFA	0.919505	0.726187
D3	26	VEGFA	1.07644	0.882528
D3	27	VEGFA	1.1855	0.990993
D3	28	VEGFA	1.26268	1.06757
D3	29	VEGFA	1.31949	1.12379
D3	30	VEGFA	1.36055	1.16425
D3	31	VEGFA	1.38912	1.19222
D3	32	VEGFA	1.40725	1.20976
D3	33	VEGFA	1.42941	1.23132
D3	34	VEGFA	1.44046	1.24177
D3	35	VEGFA	1.44946	1.25018
D3	36	VEGFA	1.45946	1.25958
D3	37	VEGFA	1.46575	1.26527
D3	38	VEGFA	1.47175	1.27068
D3	39	VEGFA	1.47085	1.26917
D3	40	VEGFA	1.47487	1.2726
D3	41	VEGFA	1.47718	1.27432
D3	42	VEGFA	1.47635	1.27289
D3	43	VEGFA	1.4748	1.27074
D3	44	VEGFA	1.47686	1.27221
D3	45	VEGFA	1.48113	1.27588
D4	1	JUN	0.209208	0.00282956
D4	2	JUN	0.206937	4.50164e-05
D4	3	JUN	0.207403	-3.7885e-06
D4	4	JUN	0.207618	-0.000303395
D4	5	JUN	0.207446	-0.000989418
D4	6	JUN	0.210158	0.0012085
D4	7	JUN	0.210155	0.000691366
D4	8	JUN	0.210262	0.00028322
D4	9	JUN	0.211	0.000507702
D4	10	JUN	0.21223	0.00122312
D4	11	JUN	0.21054	-0.000980976
D4	12	JUN	0.212563	0.000526765
D4	13	JUN	0.212378	-0.000172074
D4	14	JUN	0.212383	-0.000681488
D4	15	JUN	0.212537	-0.00104127
D4	16	JUN	0.212758	-0.00133485
D4	17	JUN	0.213866	-0.00074091
D4	18	JUN	0.213601	-0.0015203
D4	19	JUN	0.215933	0.000297351
D4	20	JUN	0.217239	0.00108899
D4	21	JUN	0.218606	0.00194146
D4	22	JUN	0.225881	0.00870239
D4	23	JUN	0.237306	0.0196131
D4	24	JUN	0.260454	0.042246
D4	25	JUN	0.302388	0.0836659
D4	26	JUN	0.375777	0.156541
D4	27	JUN	0.489928	0.270178
D4	28	JUN	0.644068	0.423803
D4	29	JUN	0.821118	0.600339
D4	30	JUN	0.981564	0.76027
D4	31	JUN	1.10965	0.887846
D4	32	JUN	1.20534	0.983018
D4	33	JUN	1.27849	1.05565
D4	34	JUN	1.33455	1.1112
D4	35	JUN	1.3702	1.14633
D4	36	JUN	1.40206	1.17768
D4	37	JUN	1.42412	1.19923
D4	38	JUN	1.44868	1.22327
D4	39	JUN	1.4598	1.23388
D4	40	JUN	1.47496	1.24852
D4	41	JUN	1.48958	1.26263
D4	42	JUN	1.49636	1.2689
D4	43	JUN	1.49905	1.27107
D4	44	JUN	1.51069	1.28219
D4	45	JUN	1.51762	1.28861
D5	1	JUN	0.177711	0.00134759
D5	2	JUN	0.176119	-0.000685992
D5	3	JUN	0.176278	-0.000969004
D5	4	JUN	0.177793	0.000104257
D5	5	JUN	0.177582	-0.000548587
D5	6	JUN	0.179479	0.00090668
D5	7	JUN	0.179286	0.000272104
D5	8	JUN	0.180646	0.00118992
D5	9	JUN	0.181123	0.00122498
D5	10	JUN	0.181278	0.000938604
D5	11	JUN	0.180923	0.000140786
D5	12	JUN	0.181644	0.000420471
D5	13	JUN	0.181666	6.96209e-08
D5	14	JUN	0.180965	-0.0011427
D5	15	JUN	0.181946	-0.000603656
D5	16	JUN	0.181759	-0.00123196
D5	17	JUN	0.182313	-0.00111981
D5	18	JUN	0.182419	-0.00145603
D5	19	JUN	0.181604	-0.00271315
D5	20	JUN	0.183405	-0.00135374
D5	21	JUN	0.185901	0.000700123
D5	22	JUN	0.190883	0.00524063
D5	23	JUN	0.199953	0.0138684
D5	24	JUN	0.218801	0.0322752
D5	25	JUN	0.250921	0.0639525
D5	26	JUN	0.310826	0.123416
D5	27	JUN	0.407908	0.220056
D5	28	JUN	0.550528	0.362234
D5	29	JUN	0.72415	0.535414
D5	30	JUN	0.895187	0.70601
D5	31	JUN	1.03768	0.848062
D5	32	JUN	1.14424	0.954177
D5	33	JUN	1.22787	1.03737
D5	34	JUN	1.28982	1.09887
D5	35	JUN	1.32747	1.13608
D5	36	JUN	1.36475	1.17292
D5	37	JUN	1.39167	1.1994
D5	38	JUN	1.4147	1.22199
D5	39	JUN	1.42882	1.23567
D5	40	JUN	1.4434	1.24981
D5	41	JUN	1.45671	1.26267
D5	42	JUN	1.46645	1.27197
D5	43	JUN	1.47018	1.27526
D5	44	JUN	1.4814	1.28603
D5	45	JUN	1.48996	1.29415
D6	1	JUN	0.163885	0.000629363
D6	2	JUN	0.163012	-0.000907122
D6	3	JUN	0.16386	-0.000723283
D6	4	JUN	0.165657	0.000409135
D6	5	JUN	0.166117	0.000204933
D6	6	JUN	0.16682	0.000244708
D6	7	JUN	0.168114	0.000874301
D6	8	JUN	0.168089	0.000185022
D6	9	JUN	0.169125	0.000557496
D6	10	JUN	0.170175	0.000943395
D6	11	JUN	0.170183	0.000287211
D6	12	JUN	0.171719	0.00115859
D6	13	JUN	0.17125	2.55992e-05
D6	14	JUN	0.170655	-0.00123332
D6	15	JUN	0.171146	-0.00140647
D6	16	JUN	0.172166	-0.00105018
D6	17	JUN	0.172594	-0.00128654
D6	18	JUN	0.17183	-0.00271436
D6	19	JUN	0.173545	-0.00166392
D6	20	JUN	0.174251	-0.00162229
D6	21	JUN	0.177806	0.0012695
D6	22	JUN	0.182741	0.00554046
D6	23	JUN	0.191599	0.0137339
D6	24	JUN	0.208315	0.0297861
D6	25	JUN	0.241265	0.0620721
D6	26	JUN	0.298587	0.118729
D6	27	JUN	0.394741	0.214219
D6	28	JUN	0.533359	0.352174
D6	29	JUN	0.705355	0.523505
D6	30	JUN	0.880594	0.69808
D6	31	JUN	1.0222	0.839022
D6	32	JUN	1.13424	0.950395
D6	33	JUN	1.21707	1.03257
D6	34	JUN	1.28045	1.09528
D6	35	JUN	1.32382	1.13798
D6	36	JUN	1.35755	1.17105
D6	37	JUN	1.38688	1.19972
D6	38	JUN	1.41347	1.22564
D6	39	JUN	1.42582	1.23733
D6	40	JUN	1.44267	1.25352
D6	41	JUN	1.45729	1.26747
D6	42	JUN	1.46636	1.27588
D6	43	JUN	1.47353	1.28238
D6	44	JUN	1.4789	1.28709
D6	45	JUN	1.48529	1.29282
D7	1	MAPK3	0.164678	0.00124341
D7	2	MAPK3	0.164328	0.000268555
D7	3	MAPK3	0.164744	5.95485e-05
D7	4	MAPK3	0.165229	-8.10173e-05
D7	5	MAPK3	0.166479	0.000543591
D7	6	MAPK3	0.166342	-0.000219306
D7	7	MAPK3	0.167817	0.00063025
D7	8	MAPK3	0.169194	0.00138246
D7	9	MAPK3	0.167353	-0.00108436
D7	10	MAPK3	0.169374	0.000311639
D7	11	MAPK3	0.168914	-0.000773228
D7	12	MAPK3	0.168923	-0.00138959
D7	13	MAPK3	0.170659	-0.000279693
D7	14	MAPK3	0.170488	-0.00107545
D7	15	MAPK3	0.171634	-0.000554954
D7	16	MAPK3	0.173714	0.000899933
D7	17	MAPK3	0.17507	0.00163018
D7	18	MAPK3	0.17879	0.0047247
D7	19	MAPK3	0.188901	0.0142108
D7	20	MAPK3	0.205277	0.0299613
D7	21	MAPK3	0.235509	0.0595685
D7	22	MAPK3	0.28957	0.113004
D7	23	MAPK3	0.379944	0.202752
D7	24	MAPK3	0.51229	0.334473
D7	25	MAPK3	0.679309	0.500867
D7	26	MAPK3	0.849899	0.670832
D7	27	MAPK3	0.993393	0.8137
D7	28	MAPK3	1.09985	0.919527
D7	29	MAPK3	1.18259	1.00164
D7	30	MAPK3	1.24654	1.06497
D7	31	MAPK3	1.28771	1.10551
D7	32	MAPK3	1.32132	1.1385
D7	33	MAPK3	1.34963	1.16618
D7	34	MAPK3	1.36972	1.18565
D7	35	MAPK3	1.38173	1.19704
D7	36	MAPK3	1.39209	1.20677
D7	37	MAPK3	1.40474	1.2188
D7	38	MAPK3	1.41167	1.2251
D7	39	MAPK3	1.41375	1.22656
D7	40	MAPK3	1.41844	1.23061
D7	41	MAPK3	1.4222	1.23376
D7	42	MAPK3	1.42518	1.2361
D7	43	MAPK3	1.42579	1.23609
D7	44	MAPK3	1.42543	1.23511
D7	45	MAPK3	1.42848	1.23753
D8	1	MAPK3	0.160365	0.00328769
D8	2	MAPK3	0.158464	0.000571444
D8	3	MAPK3	0.159518	0.000810214
D8	4	MAPK3	0.159186	-0.000336436
D8	5	MAPK3	0.160695	0.000356924
D8	6	MAPK3	0.162059	0.000905997
D8	7	MAPK3	0.162505	0.000536114
D8	8	MAPK3	0.163135	0.000351409
D8	9	MAPK3	0.163286	-0.000312563
D8	10	MAPK3	0.164159	-0.00025508
D8	11	MAPK3	0.16381	-0.00141937
D8	12	MAPK3	0.166064	1.95372e-05
D8	13	MAPK3	0.165663	-0.00119722
D8	14	MAPK3	0.166981	-0.000694717
D8	15	MAPK3	0.165815	-0.00267546
D8	16	MAPK3	0.168284	-0.00102154
D8	17	MAPK3	0.171261	0.00114011
D8	18	MAPK3	0.174728	0.00379209
D8	19	MAPK3	0.183934	0.0121827
D8	20	MAPK3	0.201096	0.0285294
D8	21	MAPK3	0.232113	0.0587308
D8	22	MAPK3	0.286683	0.112486
D8	23	MAPK3	0.380491	0.205478
D8	24	MAPK3	0.518129	0.342301
D8	25	MAPK3	0.691602	0.514959
D8	26	MAPK3	0.866959	0.689501
D8	27	MAPK3	1.01481	0.836537
D8	28	MAPK3	1.12499	0.9459
D8	29	MAPK3	1.21084	1.03093
D8	30	MAPK3	1.27552	1.0948
D8	31	MAPK3	1.31607	1.13454
D8	32	MAPK3	1.3493	1.16695
D8	33	MAPK3	1.37714	1.19398
D8	34	MAPK3	1.39798	1.214
D8	35	MAPK3	1.40908	1.22428
D8	36	MAPK3	1.42315	1.23754
D8	37	MAPK3	1.43645	1.25002
D8	38	MAPK3	1.44214	1.2549
D8	39	MAPK3	1.44435	1.25629
D8	40	MAPK3	1.44916	1.26029
D8	41	MAPK3	1.45372	1.26403
D8	42	MAPK3	1.45399	1.26349
D8	43	MAPK3	1.45364	1.26233
D8	44	MAPK3	1.45803	1.2659
D8	45	MAPK3	1.45718	1.26423
D9	1	MAPK3	0.192283	0.00448123
D9	2	MAPK3	0.18949	0.000907124
D9	3	MAPK3	0.189623	0.000259462
D9	4	MAPK3	0.191028	0.000883107
D9	5	MAPK3	0.191918	0.000993109
D9	6	MAPK3	0.192517	0.000810274
D9	7	MAPK3	0.192462	-2.49046e-05
D9	8	MAPK3	0.192496	-0.00077227
D9	9	MAPK3	0.193926	-0.000122921
D9	10	MAPK3	0.19437	-0.000459923
D9	11	MAPK3	0.195766	0.000154871
D9	12	MAPK3	0.195374	-0.00101779
D9	13	MAPK3	0.195474	-0.00169925
[truncated: 2,327 more rows]

## Sheet: BioGroup Analysis Result
Block Type	96alum
Chemistry	SYBR_GREEN
Experiment File Name
Experiment Run End Time	Not Started
Instrument Type	sds7500
Passive Reference	ROX
Biogroup Name	Target Name	Task	RQ	RQ Min	RQ Max	Cт Mean	ΔCт Mean	ΔCт SE	ΔΔCт
Analysis Type	Singleplex
Endogenous Control	GAPDH
RQ Min/Max Confidence Level	95.0
Reference Biogroup Name
