# Supplementary material for: Regulatory mechanism of Scutellaria baicalensis Georgi on bone cancer pain based on network pharmacology and experimental verification
Source: PeerJ journal article supplement (doi:10.7717/peerj.14394), 2022-11-17
Supplement: Raw_Data.zip [file wogonin-GAT_data.xls]

## Sheet: Sample Setup
Block Type	96alum
Chemistry	SYBR_GREEN
Experiment File Name	C:\Users\Administrator\Desktop\20211108-GAT.eds
Experiment Run End Time	Not Started
Instrument Type	sds7500
Passive Reference	ROX
Well	Sample Name	Sample Color	Biogroup Name	Biogroup Color	Target Name	Target Color	Task	Reporter	Quencher	Comments
A1	NC	RGB(132,193,241)			VEGFA	RGB(139,189,249)	UNKNOWN	SYBR	None
A2	NC	RGB(132,193,241)			VEGFA	RGB(139,189,249)	UNKNOWN	SYBR	None
A3	NC	RGB(132,193,241)			VEGFA	RGB(139,189,249)	UNKNOWN	SYBR	None
A4	NC	RGB(132,193,241)			LI-6	RGB(208,243,98)	UNKNOWN	SYBR	None
A5	NC	RGB(132,193,241)			LI-6	RGB(208,243,98)	UNKNOWN	SYBR	None
A6	NC	RGB(132,193,241)			LI-6	RGB(208,243,98)	UNKNOWN	SYBR	None
A7	NC	RGB(132,193,241)			MAPK3	RGB(244,165,230)	UNKNOWN	SYBR	None
A8	NC	RGB(132,193,241)			MAPK3	RGB(244,165,230)	UNKNOWN	SYBR	None
A9	NC	RGB(132,193,241)			MAPK3	RGB(244,165,230)	UNKNOWN	SYBR	None
A10	NC	RGB(132,193,241)			JUN	RGB(255,191,168)	UNKNOWN	SYBR	None
A11	NC	RGB(132,193,241)			JUN	RGB(255,191,168)	UNKNOWN	SYBR	None
A12	NC	RGB(132,193,241)			JUN	RGB(255,191,168)	UNKNOWN	SYBR	None
B1	10	RGB(132,193,241)			VEGFA	RGB(139,189,249)	UNKNOWN	SYBR	None
B2	10	RGB(132,193,241)			VEGFA	RGB(139,189,249)	UNKNOWN	SYBR	None
B3	10	RGB(132,193,241)			VEGFA	RGB(139,189,249)	UNKNOWN	SYBR	None
B4	10	RGB(132,193,241)			LI-6	RGB(208,243,98)	UNKNOWN	SYBR	None
B5	10	RGB(132,193,241)			LI-6	RGB(208,243,98)	UNKNOWN	SYBR	None
B6	10	RGB(132,193,241)			LI-6	RGB(208,243,98)	UNKNOWN	SYBR	None
B7	10	RGB(132,193,241)			MAPK3	RGB(244,165,230)	UNKNOWN	SYBR	None
B8	10	RGB(132,193,241)			MAPK3	RGB(244,165,230)	UNKNOWN	SYBR	None
B9	10	RGB(132,193,241)			MAPK3	RGB(244,165,230)	UNKNOWN	SYBR	None
B10	10	RGB(132,193,241)			JUN	RGB(255,191,168)	UNKNOWN	SYBR	None
B11	10	RGB(132,193,241)			JUN	RGB(255,191,168)	UNKNOWN	SYBR	None
B12	10	RGB(132,193,241)			JUN	RGB(255,191,168)	UNKNOWN	SYBR	None
C1	20	RGB(168,255,222)			VEGFA	RGB(139,189,249)	UNKNOWN	SYBR	None
C2	20	RGB(168,255,222)			VEGFA	RGB(139,189,249)	UNKNOWN	SYBR	None
C3	20	RGB(168,255,222)			VEGFA	RGB(139,189,249)	UNKNOWN	SYBR	None
C4	20	RGB(168,255,222)			LI-6	RGB(208,243,98)	UNKNOWN	SYBR	None
C5	20	RGB(168,255,222)			LI-6	RGB(208,243,98)	UNKNOWN	SYBR	None
C6	20	RGB(168,255,222)			LI-6	RGB(208,243,98)	UNKNOWN	SYBR	None
C7	20	RGB(168,255,222)			MAPK3	RGB(244,165,230)	UNKNOWN	SYBR	None
C8	20	RGB(168,255,222)			MAPK3	RGB(244,165,230)	UNKNOWN	SYBR	None
C9	20	RGB(168,255,222)			MAPK3	RGB(244,165,230)	UNKNOWN	SYBR	None
C10	20	RGB(168,255,222)			JUN	RGB(255,191,168)	UNKNOWN	SYBR	None
C11	20	RGB(168,255,222)			JUN	RGB(255,191,168)	UNKNOWN	SYBR	None
C12	20	RGB(168,255,222)			JUN	RGB(255,191,168)	UNKNOWN	SYBR	None
D1	40	RGB(223,221,142)			VEGFA	RGB(139,189,249)	UNKNOWN	SYBR	None
D2	40	RGB(223,221,142)			VEGFA	RGB(139,189,249)	UNKNOWN	SYBR	None
D3	40	RGB(223,221,142)			VEGFA	RGB(139,189,249)	UNKNOWN	SYBR	None
D4	40	RGB(223,221,142)			LI-6	RGB(208,243,98)	UNKNOWN	SYBR	None
D5	40	RGB(223,221,142)			LI-6	RGB(208,243,98)	UNKNOWN	SYBR	None
D6	40	RGB(223,221,142)			LI-6	RGB(208,243,98)	UNKNOWN	SYBR	None
D7	40	RGB(223,221,142)			MAPK3	RGB(244,165,230)	UNKNOWN	SYBR	None
D8	40	RGB(223,221,142)			MAPK3	RGB(244,165,230)	UNKNOWN	SYBR	None
D9	40	RGB(223,221,142)			MAPK3	RGB(244,165,230)	UNKNOWN	SYBR	None
D10	40	RGB(223,221,142)			JUN	RGB(255,191,168)	UNKNOWN	SYBR	None
D11	40	RGB(223,221,142)			JUN	RGB(255,191,168)	UNKNOWN	SYBR	None
D12	40	RGB(223,221,142)			JUN	RGB(255,191,168)	UNKNOWN	SYBR	None
E1	80	RGB(247,255,168)			VEGFA	RGB(139,189,249)	UNKNOWN	SYBR	None
E2	80	RGB(247,255,168)			VEGFA	RGB(139,189,249)	UNKNOWN	SYBR	None
E3	80	RGB(247,255,168)			VEGFA	RGB(139,189,249)	UNKNOWN	SYBR	None
E4	80	RGB(247,255,168)			LI-6	RGB(208,243,98)	UNKNOWN	SYBR	None
E5	80	RGB(247,255,168)			LI-6	RGB(208,243,98)	UNKNOWN	SYBR	None
E6	80	RGB(247,255,168)			LI-6	RGB(208,243,98)	UNKNOWN	SYBR	None
E7	80	RGB(247,255,168)			MAPK3	RGB(244,165,230)	UNKNOWN	SYBR	None
E8	80	RGB(247,255,168)			MAPK3	RGB(244,165,230)	UNKNOWN	SYBR	None
E9	80	RGB(247,255,168)			MAPK3	RGB(244,165,230)	UNKNOWN	SYBR	None
E10	80	RGB(247,255,168)			JUN	RGB(255,191,168)	UNKNOWN	SYBR	None
E11	80	RGB(247,255,168)			JUN	RGB(255,191,168)	UNKNOWN	SYBR	None
E12	80	RGB(247,255,168)			JUN	RGB(255,191,168)	UNKNOWN	SYBR	None
F1	120	RGB(180,255,0)			VEGFA	RGB(139,189,249)	UNKNOWN	SYBR	None
F2	120	RGB(180,255,0)			VEGFA	RGB(139,189,249)	UNKNOWN	SYBR	None
F3	120	RGB(180,255,0)			VEGFA	RGB(139,189,249)	UNKNOWN	SYBR	None
F4	120	RGB(180,255,0)			LI-6	RGB(208,243,98)	UNKNOWN	SYBR	None
F5	120	RGB(180,255,0)			LI-6	RGB(208,243,98)	UNKNOWN	SYBR	None
F6	120	RGB(180,255,0)			LI-6	RGB(208,243,98)	UNKNOWN	SYBR	None
F7	120	RGB(180,255,0)			MAPK3	RGB(244,165,230)	UNKNOWN	SYBR	None
F8	120	RGB(180,255,0)			MAPK3	RGB(244,165,230)	UNKNOWN	SYBR	None
F9	120	RGB(180,255,0)			MAPK3	RGB(244,165,230)	UNKNOWN	SYBR	None
F10	120	RGB(180,255,0)			JUN	RGB(255,191,168)	UNKNOWN	SYBR	None
F11	120	RGB(180,255,0)			JUN	RGB(255,191,168)	UNKNOWN	SYBR	None
F12	120	RGB(180,255,0)			JUN	RGB(255,191,168)	UNKNOWN	SYBR	None
G1	NC	RGB(132,193,241)			GAPDH	RGB(139,189,249)	UNKNOWN	SYBR	None
G2	NC	RGB(132,193,241)			GAPDH	RGB(139,189,249)	UNKNOWN	SYBR	None
G3	NC	RGB(132,193,241)			GAPDH	RGB(139,189,249)	UNKNOWN	SYBR	None
G4	10	RGB(132,193,241)			GAPDH	RGB(139,189,249)	UNKNOWN	SYBR	None
G5	10	RGB(132,193,241)			GAPDH	RGB(139,189,249)	UNKNOWN	SYBR	None
G6	10	RGB(132,193,241)			GAPDH	RGB(139,189,249)	UNKNOWN	SYBR	None
G7	20	RGB(168,255,222)			GAPDH	RGB(139,189,249)	UNKNOWN	SYBR	None
G8	20	RGB(168,255,222)			GAPDH	RGB(139,189,249)	UNKNOWN	SYBR	None
G9	20	RGB(168,255,222)			GAPDH	RGB(139,189,249)	UNKNOWN	SYBR	None
G10	40	RGB(223,221,142)			GAPDH	RGB(139,189,249)	UNKNOWN	SYBR	None
G11	40	RGB(223,221,142)			GAPDH	RGB(139,189,249)	UNKNOWN	SYBR	None
G12	40	RGB(223,221,142)			GAPDH	RGB(139,189,249)	UNKNOWN	SYBR	None
H1	80	RGB(247,255,168)			GAPDH	RGB(139,189,249)	UNKNOWN	SYBR	None
H2	80	RGB(247,255,168)			GAPDH	RGB(139,189,249)	UNKNOWN	SYBR	None
H3	80	RGB(247,255,168)			GAPDH	RGB(139,189,249)	UNKNOWN	SYBR	None
H4	120	RGB(180,255,0)			GAPDH	RGB(139,189,249)	UNKNOWN	SYBR	None
H5	120	RGB(180,255,0)			GAPDH	RGB(139,189,249)	UNKNOWN	SYBR	None
H6	120	RGB(180,255,0)			GAPDH	RGB(139,189,249)	UNKNOWN	SYBR	None
H7
H8
H9
H10
H11
H12

## Sheet: Results
Block Type	96alum
Chemistry	SYBR_GREEN
Experiment File Name	C:\Users\Administrator\Desktop\20211108-GAT.eds
Experiment Run End Time	Not Started
Instrument Type	sds7500
Passive Reference	ROX
Well	Sample Name	Target Name	Task	Reporter	Quencher	RQ	RQ Min	RQ Max	Cт	Cт Mean	Cт SD	ΔCт	ΔCт Mean	ΔCт SE	HK Control ΔCт Mean	HK Control ΔCт SE	ΔΔCт	Automatic Ct Threshold	Ct Threshold	Automatic Baseline	Baseline Start	Baseline End	Efficiency	Tm1	Tm2	Tm3	Comments
A1	NC	VEGFA	UNKNOWN	SYBR	None	1	0.883237	1.1322	25.0176	24.9281	0.108376		7.30406	0.0645169			0	TRUE	0.152865	TRUE	3	21	1	84.7545
A2	NC	VEGFA	UNKNOWN	SYBR	None	1	0.883237	1.1322	24.9591	24.9281	0.108376		7.30406	0.0645169			0	TRUE	0.152865	TRUE	3	20	1	84.7545
A3	NC	VEGFA	UNKNOWN	SYBR	None	1	0.883237	1.1322	24.8076	24.9281	0.108376		7.30406	0.0645169			0	TRUE	0.152865	TRUE	3	20	1	84.7545
A7	NC	MAPK3	UNKNOWN	SYBR	None	1	0.871363	1.14763	25.2992	25.2388	0.0854307		7.61473	0.062422			0	TRUE	0.142787	TRUE	3	21	1	86.8594
A9	NC	MAPK3	UNKNOWN	SYBR	None	1	0.871363	1.14763	25.1783	25.2388	0.0854307		7.61473	0.062422			0	TRUE	0.142787	TRUE	3	21	1	86.684
B1	10	VEGFA	UNKNOWN	SYBR	None	1.3252	1.24066	1.41549	23.5215	23.4561	0.0569352		6.89785	0.0342511			-0.406206	TRUE	0.152865	TRUE	3	19	1	84.7545
B2	10	VEGFA	UNKNOWN	SYBR	None	1.3252	1.24066	1.41549	23.4297	23.4561	0.0569352		6.89785	0.0342511			-0.406206	TRUE	0.152865	TRUE	3	19	1	84.9299
B3	10	VEGFA	UNKNOWN	SYBR	None	1.3252	1.24066	1.41549	23.4172	23.4561	0.0569352		6.89785	0.0342511			-0.406206	TRUE	0.152865	TRUE	3	19	1	84.9299
B7	10	MAPK3	UNKNOWN	SYBR	None	0.612202	0.59021	0.635014	24.9132	24.8809	0.0283962		8.32265	0.0190099			0.70792	TRUE	0.142787	TRUE	3	20	1	87.2102
B8	10	MAPK3	UNKNOWN	SYBR	None	0.612202	0.59021	0.635014	24.8597	24.8809	0.0283962		8.32265	0.0190099			0.70792	TRUE	0.142787	TRUE	3	20	1	87.0348
B9	10	MAPK3	UNKNOWN	SYBR	None	0.612202	0.59021	0.635014	24.8699	24.8809	0.0283962		8.32265	0.0190099			0.70792	TRUE	0.142787	TRUE	3	20	1	87.0348
C1	20	VEGFA	UNKNOWN	SYBR	None	1.54792	1.45242	1.64969	24.0993	24.1026	0.0512533		6.67373	0.0330886			-0.630327	TRUE	0.152865	TRUE	3	19	1	84.9299
C2	20	VEGFA	UNKNOWN	SYBR	None	1.54792	1.45242	1.64969	24.1555	24.1026	0.0512533		6.67373	0.0330886			-0.630327	TRUE	0.152865	TRUE	3	20	1	84.9299
C3	20	VEGFA	UNKNOWN	SYBR	None	1.54792	1.45242	1.64969	24.0531	24.1026	0.0512533		6.67373	0.0330886			-0.630327	TRUE	0.152865	TRUE	3	19	1	84.9299
C7	20	MAPK3	UNKNOWN	SYBR	None	0.741625	0.684958	0.802979	25.4981	25.4749	0.0667828		8.04597	0.0413021			0.431239	TRUE	0.142787	TRUE	3	21	1	87.0348
C8	20	MAPK3	UNKNOWN	SYBR	None	0.741625	0.684958	0.802979	25.3996	25.4749	0.0667828		8.04597	0.0413021			0.431239	TRUE	0.142787	TRUE	3	21	1	87.0348
C9	20	MAPK3	UNKNOWN	SYBR	None	0.741625	0.684958	0.802979	25.5269	25.4749	0.0667828		8.04597	0.0413021			0.431239	TRUE	0.142787	TRUE	3	21	1	86.8594
D1	40	VEGFA	UNKNOWN	SYBR	None	1.36499	1.30522	1.42749	22.7868	22.8161	0.0311108		6.85517	0.0232645			-0.44889	TRUE	0.152865	TRUE	3	18	1	84.9299
D2	40	VEGFA	UNKNOWN	SYBR	None	1.36499	1.30522	1.42749	22.8487	22.8161	0.0311108		6.85517	0.0232645			-0.44889	TRUE	0.152865	TRUE	3	18	1	85.1053
D3	40	VEGFA	UNKNOWN	SYBR	None	1.36499	1.30522	1.42749	22.8127	22.8161	0.0311108		6.85517	0.0232645			-0.44889	TRUE	0.152865	TRUE	3	18	1	85.1053
D7	40	MAPK3	UNKNOWN	SYBR	None	0.504353	0.482224	0.527498	24.5695	24.5631	0.0312225		8.60222	0.0233143			0.987493	TRUE	0.142787	TRUE	3	20	1	87.2102
D8	40	MAPK3	UNKNOWN	SYBR	None	0.504353	0.482224	0.527498	24.5292	24.5631	0.0312225		8.60222	0.0233143			0.987493	TRUE	0.142787	TRUE	3	20	1	87.2102
D9	40	MAPK3	UNKNOWN	SYBR	None	0.504353	0.482224	0.527498	24.5906	24.5631	0.0312225		8.60222	0.0233143			0.987493	TRUE	0.142787	TRUE	3	20	1	87.0348
E1	80	VEGFA	UNKNOWN	SYBR	None	1.29036	1.22364	1.36072	23.3922	23.3467	0.0435537		6.93628	0.0275881			-0.367771	TRUE	0.152865	TRUE	3	19	1	84.9299
E2	80	VEGFA	UNKNOWN	SYBR	None	1.29036	1.22364	1.36072	23.3054	23.3467	0.0435537		6.93628	0.0275881			-0.367771	TRUE	0.152865	TRUE	3	19	1	85.1053
E3	80	VEGFA	UNKNOWN	SYBR	None	1.29036	1.22364	1.36072	23.3425	23.3467	0.0435537		6.93628	0.0275881			-0.367771	TRUE	0.152865	TRUE	3	19	1	85.1053
E7	80	MAPK3	UNKNOWN	SYBR	None	0.459308	0.417076	0.505815	25.2434	25.1476	0.0845518		8.7372	0.0501179			1.12247	TRUE	0.142787	TRUE	3	20	1	87.2102
E8	80	MAPK3	UNKNOWN	SYBR	None	0.459308	0.417076	0.505815	25.0833	25.1476	0.0845518		8.7372	0.0501179			1.12247	TRUE	0.142787	TRUE	3	20	1	87.0348
E9	80	MAPK3	UNKNOWN	SYBR	None	0.459308	0.417076	0.505815	25.1163	25.1476	0.0845518		8.7372	0.0501179			1.12247	TRUE	0.142787	TRUE	3	20	1	87.0348
F1	120	VEGFA	UNKNOWN	SYBR	None	1.20509	1.16057	1.25131	23.0073	22.97	0.0327316		7.03492	0.0195592			-0.269138	TRUE	0.152865	TRUE	3	18	1	84.9299
F2	120	VEGFA	UNKNOWN	SYBR	None	1.20509	1.16057	1.25131	22.9461	22.97	0.0327316		7.03492	0.0195592			-0.269138	TRUE	0.152865	TRUE	3	18	1	84.9299
F3	120	VEGFA	UNKNOWN	SYBR	None	1.20509	1.16057	1.25131	22.9566	22.97	0.0327316		7.03492	0.0195592			-0.269138	TRUE	0.152865	TRUE	3	18	1	84.9299
F7	120	MAPK3	UNKNOWN	SYBR	None	0.709651	0.585244	0.860505	24.23	24.0446	0.173252		8.10954	0.100154			0.494817	TRUE	0.142787	TRUE	3	20	1	87.0348
F8	120	MAPK3	UNKNOWN	SYBR	None	0.709651	0.585244	0.860505	24.0171	24.0446	0.173252		8.10954	0.100154			0.494817	TRUE	0.142787	TRUE	3	19	1	86.8594
F9	120	MAPK3	UNKNOWN	SYBR	None	0.709651	0.585244	0.860505	23.8868	24.0446	0.173252		8.10954	0.100154			0.494817	TRUE	0.142787	TRUE	3	19	1	87.0348
G1	NC	GAPDH	UNKNOWN	SYBR	None				17.6507	17.624	0.0272384							TRUE	0.181657	TRUE	3	12	1	85.1053
G2	NC	GAPDH	UNKNOWN	SYBR	None				17.6251	17.624	0.0272384							TRUE	0.181657	TRUE	3	13	1	85.2807
G3	NC	GAPDH	UNKNOWN	SYBR	None				17.5963	17.624	0.0272384							TRUE	0.181657	TRUE	3	13	1	85.2807
G4	10	GAPDH	UNKNOWN	SYBR	None				16.5511	16.5583	0.016667							TRUE	0.181657	TRUE	3	12	1	85.4561
G5	10	GAPDH	UNKNOWN	SYBR	None				16.5464	16.5583	0.016667							TRUE	0.181657	TRUE	3	11	1	85.4561
G6	10	GAPDH	UNKNOWN	SYBR	None				16.5773	16.5583	0.016667							TRUE	0.181657	TRUE	3	12	1	85.4561
G7	20	GAPDH	UNKNOWN	SYBR	None				17.4463	17.4289	0.0256449							TRUE	0.181657	TRUE	3	12	1	85.2807
G8	20	GAPDH	UNKNOWN	SYBR	None				17.4409	17.4289	0.0256449							TRUE	0.181657	TRUE	3	12	1	85.2807
G9	20	GAPDH	UNKNOWN	SYBR	None				17.3995	17.4289	0.0256449							TRUE	0.181657	TRUE	3	12	1	85.2807
G10	40	GAPDH	UNKNOWN	SYBR	None				15.9654	15.9609	0.0256091							TRUE	0.181657	TRUE	3	11	1	85.2807
G11	40	GAPDH	UNKNOWN	SYBR	None				15.984	15.9609	0.0256091							TRUE	0.181657	TRUE	3	11	1	85.1053
G12	40	GAPDH	UNKNOWN	SYBR	None				15.9333	15.9609	0.0256091							TRUE	0.181657	TRUE	3	11	1	84.9299
H1	80	GAPDH	UNKNOWN	SYBR	None				16.4292	16.4104	0.0196567							TRUE	0.181657	TRUE	3	11	1	85.1053
H2	80	GAPDH	UNKNOWN	SYBR	None				16.4121	16.4104	0.0196567							TRUE	0.181657	TRUE	3	12	1	85.1053
H3	80	GAPDH	UNKNOWN	SYBR	None				16.39	16.4104	0.0196567							TRUE	0.181657	TRUE	3	11	1	85.1053
H4	120	GAPDH	UNKNOWN	SYBR	None				15.9429	15.9351	0.00873694							TRUE	0.181657	TRUE	3	11	1	85.1053
H5	120	GAPDH	UNKNOWN	SYBR	None				15.9256	15.9351	0.00873694							TRUE	0.181657	TRUE	3	11	1	85.1053
H6	120	GAPDH	UNKNOWN	SYBR	None				15.9368	15.9351	0.00873694							TRUE	0.181657	TRUE	3	11	1	85.2807
Analysis Type	Singleplex
Endogenous Control	GAPDH
RQ Min/Max Confidence Level	95.0
Reference Sample	NC

## Sheet: Raw Data
Block Type	96alum
Chemistry	SYBR_GREEN
Experiment File Name	C:\Users\Administrator\Desktop\20211108-GAT.eds
Experiment Run End Time	Not Started
Instrument Type	sds7500
Passive Reference	ROX
Well	Cycle	1	2	3	4	5
A1	1	126573	15857.8	43273.1	341793	4632.45
A2	1	109907	15897.4	50757.9	382655	7137.28
A3	1	68411.6	9056.92	48725.9	366287	2899.02
A4	1	58598.8	7283.19	50056.3	368822	2264.62
A5	1	52532.6	6772.7	53306.8	383455	2173.82
A6	1	62966.3	9233.16	54589.8	373287	3411.02
A7	1	58256	7978.6	52502.1	371003	2028.03
A8	1	68835.6	8675.72	53257.7	379550	2267.29
A9	1	68676.2	9288.74	49165.7	354253	3166.63
A10	1	67645.7	8522.28	44402.8	336618	2605.78
A11	1	74280.3	9051.77	43026.1	344903	2494.33
A12	1	75246.5	9429.38	33199.6	281366	2803.98
B1	1	116575	15023.5	44425.4	343244	4095.51
B2	1	72777.3	10144.9	49349.3	376678	3369.26
B3	1	61055.8	8341.08	47420.3	346772	2085.5
B4	1	53087.3	6940.75	50596.8	354909	1727.51
B5	1	56674.9	7632.75	49744.8	334135	2218.49
B6	1	52310.3	6949.66	52557.4	353233	1536.35
B7	1	57893.5	7654.47	55216.1	369414	1715.57
B8	1	58442.4	13188.8	66762.9	389998	1790.36
B9	1	57243.6	7627.82	50883.6	357331	1854.5
B10	1	55281.2	7065.65	47698.3	354100	1967.04
B11	1	62290.7	7735.97	43251	338877	1973.72
B12	1	66339.5	7972.93	36105.5	303335	2185.78
C1	1	104321	12650.6	47123.8	363536	3682.14
C2	1	72302	9250.77	47571.7	352377	2741.47
C3	1	55472.2	7006.87	48499.3	341686	2315.94
C4	1	54488.6	7272.11	50779	342121	1877.97
C5	1	49349.6	6866.3	53652.1	352914	2121.67
C6	1	48416.5	6434.96	54009.6	350822	1677.5
C7	1	173681	20224	62171.5	364698	2946.5
C8	1	56177	7301.12	55165.8	362256	2185.9
C9	1	54624.5	7144.98	52134.3	356078	1457.04
C10	1	54211.8	6971.62	49056.8	351140	1627.65
C11	1	59458.5	7387.84	46522.3	354367	2021.57
C12	1	61057	7188.53	39571.1	323836	1854.94
D1	1	59067.1	7802.16	44997.5	360274	2918.93
D2	1	61899.2	8347.93	49985.5	366016	2517.58
D3	1	54442.5	7002.65	50383.7	348183	2265.68
D4	1	61280.1	8488.24	51771.2	338980	2412.81
D5	1	49959.4	6973.77	55508.1	355910	1840.08
D6	1	49004.1	6733.71	56196.2	356959	1508.71
D7	1	52685.1	6822.44	56958.5	362379	1678.26
D8	1	50631.3	6874.28	57007.7	370331	2244.04
D9	1	54852.1	7197.77	54622.1	364632	1953.91
D10	1	101734	18723.3	62376	381292	5253.26
D11	1	57825.6	7396.77	48697.9	363461	1331.75
D12	1	67618.3	8851.77	44030.7	353311	2465.32
E1	1	97287.1	12944	47664.4	359155	3494.36
E2	1	62453.7	7819.84	48101.6	353225	3091.94
E3	1	70203.8	10444.6	51389.7	337183	2750.8
E4	1	61423.2	8571.65	52126	337008	2108.01
E5	1	58792.3	8906.63	59445.6	369326	1864.22
E6	1	49054.5	7066.68	57819.7	368090	2152.22
E7	1	53193.5	7137.96	59180.1	374656	1355.01
E8	1	54788.5	7525.21	58237	374650	1708.52
E9	1	53664.3	7083.91	55838.2	370482	1833.83
E10	1	60591.8	8228.64	51997	360376	1884.49
E11	1	72189.6	9770.36	51762	376703	2508.91
E12	1	82673.2	11293.5	46567	360125	3397.4
F1	1	69377.9	9057.43	41863	336175	2397.49
F2	1	60551	8032.14	45320.5	338439	2421.4
F3	1	53119.1	7041.15	48780.7	342673	1966.99
F4	1	83411.7	11830.4	51359.4	336282	3750.95
F5	1	83274.2	11349	55676.6	358020	2490.9
F6	1	56456.6	7867.24	58300.7	377745	1808.14
F7	1	55963.9	7570.79	57204.9	367789	2050.79
F8	1	68495.2	9687.29	56248.5	362398	2312.39
F9	1	65492.6	8846.68	54322.4	364797	1864.07
F10	1	64581.5	8584.36	51601.4	360891	2609.63
F11	1	83845.7	11767.7	50318.1	377459	2505.06
F12	1	92117.3	12292.9	47503.4	373181	3615.41
G1	1	79558.7	10393.3	43833.5	353375	3071.82
G2	1	79395.1	10405.8	48031.5	357344	2419.13
G3	1	52016.5	6472.86	47251.8	346539	2555.81
G4	1	51404.5	7079.54	50374.1	351857	2005.41
G5	1	54696.7	7712.64	56252.8	379604	2190.24
G6	1	56973.2	8015.59	54152.7	358559	2234.35
G7	1	54486.6	7267.53	52055.5	343761	1990.05
G8	1	52607.3	7013.36	56361.4	383101	5183.13
G9	1	53588.4	7159.6	55193.3	382053	2132.51
G10	1	58232.7	7691.83	50865.6	369750	2120.11
G11	1	95415.6	13727.8	52456.7	383613	3717.41
G12	1	76907.2	9598.27	45858	372134	2597.87
H1	1	94748	11349.1	41894.3	348964	6732.41
H2	1	110096	15531.2	48229	356588	3541.76
H3	1	60148	8298.39	48766.6	367610	2553.13
H4	1	56949.3	7762.42	49317.6	359783	2771.21
H5	1	63062.2	8769.98	56471.8	397285	2585.63
H6	1	62244.4	8227.84	53982.3	374013	2209.36
H7	1	65211.8	7553.82	4635.55	5971.65	2283.04
H8	1	83035	12449.8	8375.23	11376.2	4482.35
H9	1	55695.7	5721.48	3378.62	4507.98	1566.9
H10	1	58496	6332.01	3797.87	4907.33	1395.43
H11	1	68284.1	7100.2	4230.54	6143.12	2140.43
H12	1	82459.8	8266.96	4537.12	7789.9	1586.39
A1	2	129749	16062.3	44215.5	348876	4450.79
A2	2	110821	15842	51778.4	391228	7099.91
A3	2	69067.1	9170.25	49849.9	375517	2995.62
A4	2	58637.4	7426.48	51397.3	378023	2120.58
A5	2	52739.2	6905.81	54654.7	393146	1999.6
A6	2	63565.6	9428.7	56008	385019	3355.87
A7	2	54754.3	7118.79	54096	381469	2079.05
A8	2	103517	14714.4	54856.8	390730	2294.01
A9	2	71617.9	9664.51	50310.4	362564	2784.23
A10	2	68175.6	8558.33	45741.6	345688	2560.79
A11	2	74701.7	9300.95	44014	352792	2294.7
A12	2	74307.8	9228.66	33476.4	285917	3217.93
B1	2	115712	15099.3	45186.3	351457	4192.63
B2	2	74068.1	10482.7	50726	385868	3562.34
B3	2	61036.4	8150.84	48164.6	352485	1928.62
B4	2	53415.2	6937.56	51426.7	362141	1520.7
B5	2	56817.9	7893.86	50842.9	341173	2453.9
B6	2	52689.2	6944.63	53564.1	360276	1837
B7	2	57836.9	7894.93	56091.5	376265	1828.64
B8	2	58655.3	13426.2	67849.9	397848	1940.28
B9	2	57382.5	7708.16	52269.9	366656	1874.03
B10	2	55261.4	7111.11	48707	362407	2319.02
B11	2	62379.6	8080.07	44041.6	344825	2187.89
B12	2	66234.9	8302.1	36726.4	309699	2412.41
C1	2	105386	13410.9	48268.1	371896	3501.78
C2	2	74589.9	9628.01	48505	359770	2663.99
C3	2	55821.4	7176.37	49167.3	347619	2486.08
C4	2	54837.2	7152.66	51800.9	349282	1927.78
C5	2	49388.5	6671.53	54837.7	360424	2187.44
C6	2	48339.5	6389.19	54992	357432	1912.25
C7	2	173349	20265.2	63151.3	370366	3088.09
C8	2	55429	7209.39	56440.2	370829	2123.44
C9	2	54924.4	7022.26	53095.2	363058	1836.82
C10	2	54907	7187.98	50307.1	359271	1736.82
C11	2	59406.2	7277.11	47713.5	362876	1436.64
C12	2	61545.7	7588.11	39926.7	329121	2131.53
D1	2	59459	7860.61	45861.9	368832	3114.09
D2	2	62820.6	8584.84	50970.8	373307	2454.7
D3	2	54853.9	7377.89	51254.8	354128	2199.78
D4	2	61375.6	8576.19	52842.1	345892	2409.71
D5	2	50249.6	7319.85	56547.7	364966	1591.9
D6	2	49442.4	6754.62	56890.7	361581	1303.2
D7	2	52698.2	6927.95	57931.7	368189	1653.01
D8	2	50811.5	6870.82	57843.1	377719	1774.56
D9	2	55581.2	7544.97	55974.7	373276	2163.97
D10	2	101666	18509.9	63609	389181	5376.5
D11	2	58492.4	7537.77	49893	372663	1725.94
D12	2	68071.8	8905.39	44778.1	358174	2944.87
E1	2	96849.2	13324	48634.6	367019	3310.39
E2	2	63015.1	7639.13	48793.4	359992	2914.82
E3	2	70728.4	10414.3	51990.6	343465	2541.7
E4	2	62406.7	8359.28	53473.2	346160	2298.01
E5	2	61007.1	9054.04	61709.1	382916	1870.67
E6	2	49413.3	6954.63	58870.5	375402	2404.74
E7	2	53295.7	7223.32	60531.4	383336	1428.3
E8	2	55194	7675.43	59386.5	382834	1252.16
E9	2	53798	7263.26	57225.4	380721	1608.73
E10	2	60120.1	8223.31	53143	368310	1839.7
E11	2	73224.5	10062.4	52680.9	385352	2469.78
E12	2	86189.6	11504.1	47627.7	367139	3360.89
F1	2	69533.2	9187.38	42964.3	343462	2313.85
F2	2	60423.3	8076.17	46028.4	344740	2834.09
F3	2	53034.7	7571.75	49522.9	349761	2551.42
F4	2	91320.7	13249.3	52646.6	344130	3913.45
F5	2	79675.8	11148.8	56854.2	366858	2890.9
F6	2	56974.9	7785.04	59650.8	386297	2027.89
F7	2	56087.4	7533.17	58289.9	376566	2283.75
F8	2	65077.4	9162.84	57513.3	371920	2268.95
F9	2	64838.4	8923.25	55974.4	375793	2213.29
F10	2	65128.9	8766.19	52709.8	369042	2153.37
F11	2	88998.9	12763	51175	385545	2530.67
F12	2	91428.7	12227.9	47327.3	373343	2906.01
G1	2	80740.9	10796	44913.5	361259	3564.28
G2	2	78202.8	10045	49074.8	365990	2776.5
G3	2	50524.3	6338.01	47836.1	352847	2512.86
G4	2	51991.7	7244.75	51489.5	360051	2204.88
G5	2	54705.4	8079.7	57412.4	390322	2022.68
G6	2	57412.8	7869.81	55649.8	368266	2210.09
G7	2	54849.2	7318.84	53357.3	353059	1672.69
G8	2	52720.6	7175.45	57807.8	391954	5428.25
G9	2	54270.8	7278.18	56282.3	390917	2183.66
G10	2	58586.6	7692.96	52057.5	377886	1935.47
G11	2	97089.4	14064.5	53460.5	390863	4160.19
G12	2	76808.3	9735.98	46335.8	377327	2579.26
H1	2	93655.4	11065.2	42171.2	354887	7242.5
H2	2	108208	15442.1	49034.7	364049	4072.57
H3	2	60676.7	8307.73	49541.7	376004	2598.33
H4	2	58442.4	8021.93	50326	367489	2487.77
H5	2	63156.7	9004.58	57469.9	405167	2281.03
H6	2	61656.2	8318.01	55064.2	381299	2020.52
H7	2	65655.4	7548.87	4548.12	5972.6	2202.65
H8	2	84417.6	12528.7	8549.64	11716.8	4512.77
H9	2	56415.7	6022.03	3468.23	4631.48	1880.28
H10	2	58929.1	6647.12	3777.62	4966.19	1295.22
H11	2	69248.2	7427.25	4319.38	6306.4	1875.11
H12	2	84022.3	9216.93	4607.92	7330.84	2255.26
A1	3	131038	16228.6	44785.2	354543	5059.9
A2	3	112172	15943.4	52524.8	395294	7180.5
A3	3	69334.9	9085.5	50401.6	379800	3228.66
A4	3	59181.6	7376.72	51967	382508	2266.37
A5	3	53184.4	6973.43	55263.2	397265	2344.41
A6	3	63876.9	9244.82	56575.3	389172	3524.16
A7	3	56976.8	7470.16	54734.1	385854	2159.83
A8	3	70203.2	8822.56	55359.8	395130	2328.68
A9	3	70413.6	9542.17	50856.7	366965	3120.16
A10	3	67757	8751.17	46229	349729	2789.42
A11	3	75056.1	9154.98	44443.5	356714	2806.52
A12	3	74448.4	9519.54	33766.7	289365	2902.11
B1	3	115746	15090	45762	355207	3811.71
B2	3	74806.8	10367.1	51240.2	391576	3317.77
B3	3	61311.4	8137.98	48448	354462	2235.91
B4	3	53540.8	7062.86	51692.8	365698	1704.53
B5	3	57379.3	8035.26	51161.3	344185	2330.74
B6	3	52928.9	7086.27	54040.9	363020	1763.34
B7	3	58188.2	7901.09	56673.2	380088	2334.6
B8	3	59486.3	13351.8	68054.3	401106	2044.53
B9	3	58133	7780.62	52726.2	370115	2011.56
B10	3	55333.8	7280.93	49075	365613	2256.7
B11	3	62549.3	8174.84	44050	345956	2190.72
B12	3	66906.5	8218.15	36963.4	311898	2214.54
C1	3	105992	13138.4	48644	376146	3340.47
C2	3	74205.9	9588.86	49172.3	364401	3053.67
C3	3	56163	7092.08	49552.1	349891	2244.35
C4	3	55391.9	7351.44	52103.3	351966	1849.38
C5	3	49825.2	7025.72	55244.5	364136	2015.63
C6	3	48407.4	6693.6	55427.8	359718	1893.29
C7	3	172374	20169.7	63317.3	373214	3193.7
C8	3	55726.9	7438.31	56850.7	373449	2014.57
C9	3	55595.5	7284.47	53572.4	365715	1655.03
C10	3	54084.9	7101.98	50629.6	362989	1910.96
C11	3	60060.7	7369.02	48028.2	365938	1877.25
C12	3	61662.3	7335.47	40477.7	333015	1938.68
D1	3	60731	7708.13	46662.2	372957	4323.85
D2	3	63528.3	8778.11	51351.2	376397	2465.58
D3	3	55324.9	7319.83	51515.9	355792	2442.88
D4	3	63038.9	8707.12	53406.9	349633	2787.59
D5	3	50739.5	7521.14	57265	368926	2172.54
D6	3	50096.9	6955.95	57431	364632	1680.78
D7	3	53391.3	7236.72	58434.8	371379	1620.42
D8	3	51173.4	6956.56	58355.4	380036	2018.65
D9	3	56245.6	7737.44	56587.8	376887	2375.92
D10	3	100197	18438.2	63514.2	391099	4939.77
D11	3	58440.5	7682.07	50213	374840	1897.99
D12	3	68497.4	9212.51	45362.6	361632	2850.08
E1	3	98408.2	12991.9	49199.8	371692	3459.37
E2	3	63421.1	7571.67	49509	363154	2717.48
E3	3	71879	10477	52617.6	346485	2688.97
E4	3	63517.8	8735.6	54240.2	350652	2528.48
E5	3	61581.3	9151.97	62569.7	387149	1523.42
E6	3	49371.5	7016.98	59547.3	377909	1865.26
E7	3	54180.2	7382.91	61229.4	387274	1298.11
E8	3	55290.8	7506.05	59691.8	386344	1555.36
E9	3	54676.8	7481.27	57813.7	383423	1891.44
E10	3	61581.2	8607.75	53670.5	370626	1794.9
E11	3	73403.8	9998.97	53299.7	387898	2472.95
E12	3	83544.4	11529.3	47975.1	371509	3553.74
F1	3	71880.2	9641.51	43177.4	347527	2469.56
F2	3	60801.3	8107.24	46510.8	348751	2448.75
F3	3	54120.4	7575.06	49934.3	352756	2289.74
F4	3	101210	13982.1	53185.6	347300	3581.73
F5	3	79612.3	10840.8	57564.8	370433	2127.27
F6	3	57129.4	8011.56	60269.4	390567	2066.44
F7	3	56724.6	7854.85	59100.1	379765	2321.76
F8	3	66660.1	9339.44	58037.5	375311	2138.61
F9	3	64942.1	8897.73	56307.4	379456	2235.26
F10	3	65222.5	8928.33	53016	371985	2340.17
F11	3	91753.3	12904.2	51493.5	388553	2647.75
F12	3	93236.2	12405.5	47907.6	378186	3203.68
G1	3	81295.1	10760.6	45280.3	366284	3182.15
G2	3	79106	10494.7	49594.7	370139	2745.42
G3	3	51018.2	6774.03	48073.8	354806	2454.87
G4	3	52239.6	7139.02	52116.1	363900	2191.94
G5	3	55446.6	8173.91	58092.6	394446	2463.35
G6	3	58030.8	7938.76	55950.2	372114	2370.77
G7	3	55139.6	7369.17	53670.9	356194	1926.58
G8	3	52644.4	6980.52	58150.9	395302	5519.38
G9	3	54410.5	7430.79	56666.5	393393	1810.66
G10	3	58897.2	7861.25	52384.2	380736	2557.81
G11	3	97479.2	13978.7	53763.1	392547	3926.29
G12	3	77794.4	9998.73	46855.3	379893	2641.84
H1	3	94078.8	11252.3	43024.1	361219	6754.89
H2	3	107443	15233.5	49564.3	367961	4080.58
H3	3	60435.7	8380.08	50086.1	380164	2327.09
H4	3	57956.8	8010.42	51208.2	372228	2632.94
H5	3	63767.6	8840.88	58290.6	410672	2920.4
H6	3	62020.1	8524.67	55734.7	386265	1710.74
H7	3	66281.1	7723.99	4727.73	5958.39	2129.03
H8	3	85610.2	12929.7	8728.48	11989.5	4863.41
H9	3	56991.3	6117.53	3331.46	4562.66	1282.09
H10	3	59258.8	6476.91	3839.41	4888.06	1677.75
H11	3	70477.9	7526	4303.02	6332.43	2445.02
H12	3	84788.4	8401.44	5078.86	8217.52	2108.89
A1	4	131527	16118.7	45160.5	358127	4579.02
A2	4	112360	16304.3	53046.5	398785	7310.14
A3	4	69505.3	9068.75	50819	384148	2969.73
A4	4	59119.5	7419.62	52523.7	386474	2285.58
A5	4	53155	7169.17	55618.8	400340	1960.23
A6	4	64081.5	9381.36	57110.3	392243	3367.18
A7	4	57474.8	7671.23	55101.7	389311	1844.5
A8	4	73251.1	9319.21	55859.1	398143	2593.04
A9	4	74185.4	10298.8	51140.8	369765	3040.94
A10	4	68936.8	8643.94	46499.7	353314	2709.54
A11	4	74744.7	9146.64	44754.4	359638	2841.56
A12	4	74664.1	9273.74	34005.6	291339	2708.11
B1	4	117699	15370.8	45870.9	358831	3825.58
B2	4	75434.3	10654.3	51846.8	396158	3012.06
B3	4	62208.6	8240.91	48820.6	356272	1928.62
B4	4	54115.5	7101.96	52267.3	368147	1585.54
B5	4	58014.3	7908.82	51538.1	345774	2369.71
B6	4	53229.2	7149.54	54582.2	365472	1954.26
B7	4	58567.9	7662.95	57066.4	382115	2073.48
B8	4	59872.7	13089.5	68304.7	403679	1832.58
B9	4	58577.2	7777.47	52970	372609	1860.2
B10	4	55425	7406.15	49599.6	368944	2127.67
B11	4	63043.9	8150	44174	347265	2225.63
B12	4	66540.1	8261.23	37227.7	314644	2291.62
C1	4	106830	13410.9	49105.8	378746	3481.45
C2	4	76458.8	9849.85	49471.8	367282	2637.78
C3	4	56912.7	7537.59	49856.9	352417	1883.62
C4	4	55892.1	7246.26	52529.6	353878	1712.87
C5	4	50560.5	7025.72	55981.7	366327	2362.53
C6	4	49028.3	6582.66	55890.1	361813	1621.36
C7	4	171936	19998.7	63676.6	374925	3279.42
C8	4	56210.7	7419.64	57321.2	375842	2052.55
C9	4	55599.1	7226.2	54051.5	367837	1650.53
C10	4	55823.4	7160.82	50944.7	365527	2084.19
C11	4	60698.9	7581.61	48287.6	367687	1960.34
C12	4	61545.7	7374.14	40756.4	334456	1975.47
D1	4	61455.9	7819.95	46872.6	376072	4413.55
D2	4	63884	8683.34	51805.2	378297	2933.54
D3	4	56222.9	7357.46	51684.9	357082	2446.12
D4	4	63183.5	8980.97	53775	350925	2616.2
D5	4	51528.7	7477	57664.9	371086	2178.1
D6	4	50776.8	6911.04	57661.9	365539	1461.41
D7	4	53936.8	7053.63	58594.8	372835	1793.13
D8	4	51763.7	7113.33	58830.3	382246	1811.09
D9	4	56495	7620.45	57027.6	378617	2496.09
D10	4	99198.7	18145.9	63370.5	392972	5222.89
D11	4	59498.3	8088.53	50498.8	376868	2005.79
D12	4	69849.6	8909.29	45293	363071	3006.8
E1	4	98917.7	13484.2	49636	374127	3463.89
E2	4	63665.9	8082.47	49661.2	364805	2894.61
E3	4	72126.2	10839.6	52766.4	347516	2369.71
E4	4	64319.8	8719.09	54671.9	352325	2227.18
E5	4	62201.7	9030.33	62774.4	389195	1737.36
E6	4	49817.2	6948.3	59702.1	379627	2006.82
E7	4	54582.1	7422.81	61401.9	388761	1172.73
E8	4	53668.9	7179.39	60138.6	388312	1542.95
E9	4	55429.7	7460.87	58192.7	385729	1758.09
E10	4	62908.2	8545.98	53825.9	371998	2291.81
E11	4	75703.6	10602.8	53546.3	389694	2560.74
E12	4	86190.6	11556.5	48356.9	372730	3458.25
F1	4	70882.9	8928.88	43711.4	349886	2259.8
F2	4	61712.6	8179.76	47103.4	351058	2570.57
F3	4	54084.4	7387.53	50517.6	356055	2215.59
F4	4	74607	10833.3	53305.2	349876	4090.52
F5	4	78953	11156.4	57941.8	372423	2462.49
F6	4	59809.7	8111.13	60691.6	392699	2349.81
F7	4	57393.5	7817.23	59365.4	381812	2150.21
F8	4	69437.1	9649.82	58543.2	376995	2860.89
F9	4	65716	8773.58	56778.4	381030	1855.97
F10	4	65701.4	9162.28	53569	373832	2250.73
F11	4	94163.1	13201.6	52020.9	390569	2353.83
F12	4	92401.4	12565.6	48191.8	380963	3002.7
G1	4	81926.2	11034.2	45737.8	368562	3036.84
G2	4	79276.5	10543.6	49857	372103	2483.67
G3	4	51426.3	6874.04	48564.3	356333	2126.26
G4	4	53191.1	7235.94	52446.6	366397	1791.94
G5	4	56514.1	7871.81	58702.3	397007	2486.19
G6	4	58584.4	8038.24	56597.1	374351	2168.66
G7	4	55340.7	7570.51	54057.5	358000	1785.97
G8	4	53290.1	7353.43	58531.5	396976	5376.92
G9	4	54880.9	7557.05	57029.5	397044	2069.63
G10	4	59815.5	7973.07	52920.6	383059	2488.3
G11	4	98442.8	14108.1	53735.7	393857	4097.65
G12	4	77119.3	10009.6	47106.6	382160	2506.54
H1	4	95385.5	11254	43363.3	363640	7479.99
H2	4	106813	15348	49833.6	369923	4072.57
H3	4	61405	8289.06	50117.1	382397	2495
H4	4	59338.3	8382.95	51394	374574	2561.84
H5	4	64084.8	9274.64	58551.3	412872	2621.82
H6	4	63118.5	8570.7	56132.4	388672	2177.73
H7	4	66335	7819.96	4629.85	6262.42	2346
H8	4	86722.4	12938.9	8766.55	12035.3	5074.52
H9	4	57177.1	6033.09	3463.51	4378.83	1705.01
H10	4	60086.7	6599.96	3741.4	5336.52	1364.18
H11	4	70569.3	7782.51	4174.43	6027.17	1870.35
H12	4	85060.6	8960.04	4978.83	7585.53	1838.2
A1	5	132898	16503.6	45534.6	359922	4896.93
A2	5	113691	16633.4	53492.5	401021	7704.9
A3	5	69707.3	9206.72	51361.9	386272	3202.77
A4	5	59574.1	7604.1	52838.6	388764	2103.11
A5	5	53729.4	7100.12	56142.3	401410	2117.69
A6	5	64818.8	9299.71	57327.9	393517	3497.29
A7	5	56855.6	7562.91	55615.6	391201	1867.88
A8	5	80521.9	10188.5	56199.7	400230	2587.99
A9	5	71855.7	9633.2	51674.2	371490	3207.76
A10	5	68875.8	8698.01	47049.3	355016	2716.88
A11	5	75958.4	9276.97	45033.1	361063	2520.88
A12	5	74213.1	9073.03	34256	293112	3065.66
B1	5	118255	15486.6	46474.1	360111	3823.06
B2	5	75920.9	10604.8	52471.7	398549	3330.64
B3	5	62098.6	7994.61	48904.2	357243	2034.74
B4	5	54268.1	6999.81	52708.7	369091	1874.41
B5	5	58013.5	8229.03	51472.7	343971	2129.62
B6	5	53749.6	7117.9	54747	366145	1692.69
B7	5	58924.2	7839.44	57434.4	383127	1997.02
B8	5	60073	12919.9	68340.4	404588	1999.72
B9	5	58896.4	7900.35	53423.1	373712	2218.24
B10	5	55706.9	7263.78	49801.2	370209	2134.7
B11	5	63318.8	8221.76	44197.2	348215	2498.29
B12	5	67230.4	8344.07	37435.3	315177	1981.01
C1	5	107470	13365.9	49619	380821	3345.55
C2	5	74299.7	9193.83	49669.5	368802	3161.92
C3	5	56549.3	7458.87	50237	353017	2344.76
C4	5	55740.5	7570.73	52729.6	354368	1990.5
C5	5	50554.1	7015.51	56095.7	366888	2139.76
C6	5	49832.6	6731.05	55993.6	363202	1784.67
C7	5	172072	20153.6	63944	375855	3142.42
C8	5	56504.5	7437.5	57557.7	376408	1909.92
C9	5	55711.7	7309.19	54119.5	368330	1902.52
C10	5	55327	7302.04	51253.3	366168	2188.85
C11	5	60290.9	7508.53	48430	367733	2091.54
C12	5	62108.9	7472.1	40779.1	335469	2198.78
D1	5	61463.9	7708.13	47244.9	377332	4760.23
D2	5	64315.1	8875.36	51850.6	378632	2347.08
D3	5	56942.4	7371.43	51922.9	358196	2223.55
D4	5	63323.4	8764.09	54107.6	351176	2808.24
D5	5	51801.4	7443.45	58069.5	372100	2106.79
D6	5	50913.2	6699.64	57734.5	365491	1264.87
D7	5	54467.1	7231.29	58811.6	373256	1547.1
D8	5	51735.1	7145.37	58963.9	382635	1681.02
D9	5	56903.7	7736.5	57056	378810	2230.21
D10	5	98786.4	18127.3	63727.4	392844	5347.03
D11	5	59964.2	8008.12	50565.9	377157	1814.14
D12	5	70072.2	9026.29	45619.6	363797	2850.08
E1	5	99029.2	13461.9	49748.4	376204	3571.11
E2	5	64290.8	7852.37	49982.1	365885	2685.39
E3	5	72827.2	10799.4	53167.4	348196	2777.77
E4	5	64492.3	9027.19	54811.3	352558	2330.61
E5	5	62295	9068.47	62935.2	389543	2125.47
E6	5	50385.9	7079.33	60094.1	379724	2039.35
E7	5	54971.7	7449.72	61534.7	389280	1591.29
E8	5	53691.3	7569.57	60336.8	388813	1608.14
E9	5	55617.5	7558.6	58025.2	385207	1919.17
E10	5	61656.9	8488.48	53964.2	372674	2311.6
E11	5	74555.3	10381.8	53606.3	390629	2515.26
E12	5	88568.8	12192	48378.2	373891	3240.12
F1	5	70295.5	9234.89	44055.4	351761	2769.41
F2	5	62123.1	8443.91	47098.5	352750	2776.91
F3	5	54478.6	7484.6	50782.1	357598	2373.69
F4	5	90263.2	12517.6	53758.1	351122	3920.17
F5	5	81451.9	11145.5	57931.8	373185	2818.17
F6	5	61837.2	8670.14	60787.5	393499	1990.3
F7	5	57820.2	7599.01	59642.2	382084	2358.8
F8	5	65743	9265.59	58781.4	378088	2904.34
F9	5	66159.5	8561.26	56859.6	382070	2106.91
F10	5	66661.3	9071.95	53597.6	374928	2059.4
F11	5	94562.9	13603.3	52306.1	392065	2681.9
F12	5	92946.3	12431	48230.7	381534	3137.41
G1	5	82954.5	10928.1	45900.2	370728	3518.53
G2	5	80211.8	10574.6	50165.6	374501	2743.03
G3	5	53263.8	7022.38	48715.7	358004	2421.58
G4	5	53348.7	7317.44	52694.7	367768	2155.28
G5	5	56487.2	8010.41	58800.5	398126	2415.47
G6	5	58885.6	8299.26	56821	375173	2359.66
G7	5	56019.6	7403.05	54650.3	358603	1457.87
G8	5	54058.6	7376.74	58681.2	397781	5612.61
G9	5	55472.9	7515.33	57513.8	397804	2339.26
G10	5	60038.8	8004.7	52947.7	383564	2187.45
G11	5	98445.4	14104.2	54018.4	393857	3497.26
G12	5	77988.7	10225.2	46988.4	382598	2022.82
H1	5	95680.4	12010.6	43897.8	366803	7371.78
H2	5	109284	15584.6	49993.6	371952	3923.85
H3	5	61184.6	8333.4	50823.8	384531	2658.61
H4	5	58900.4	8244.82	51887	376493	2867.99
H5	5	63529.1	9081.74	59058.8	415118	2473.04
H6	5	63035.4	8884.45	56436.9	389608	2427.04
H7	5	66722.9	7743.78	4763.84	6110.88	2172.62
H8	5	86911.5	13148.7	8900.23	12041.5	5127.29
H9	5	57896.2	6097.42	3567.27	4661.64	1389.73
H10	5	60349.1	6542.46	3756.32	5009	1999.93
H11	5	71025.1	7355.42	4537.98	6282.74	2251.08
H12	5	85164.8	9110.04	4938.81	7841.78	1668.23
A1	6	133384	16380.9	45789.7	361364	4513.57
A2	6	114105	16835	53757.4	403257	7331.16
A3	6	69366.6	9457.04	51605.9	387753	3444.77
A4	6	59759.2	7679.61	53169.3	390350	2178.19
A5	6	53598.4	7033.93	56245.8	402791	2298.48
A6	6	64777.9	9495.26	57720.7	395345	3418.8
A7	6	57865.8	7694.25	55732	392142	2127.23
A8	6	109861	12856	56398.4	400577	2345.3
A9	6	74061.8	10039.6	51616	372609	3043.22
A10	6	69147.7	8951.23	47134.3	356230	2611.29
A11	6	75361	9386.44	45112.2	360994	2352.04
A12	6	74402.4	9105.23	34299.1	293547	2822.03
B1	6	119131	15440	46919.6	361699	3858.38
B2	6	76381.7	10648.8	52880.4	400022	3273.79
B3	6	62108.8	8207.82	49321.4	358011	1628.72
B4	6	54270.7	7026.94	52682.3	370343	1869.49
B5	6	58515.3	8090.62	51633.5	345019	2345.55
B6	6	53610.5	7222.15	54792.5	367632	1802.43
B7	6	59085.8	7896.47	57462.1	383815	1910.79
B8	6	60011	12849.6	68029	405040	2085.02
B9	6	59772.9	8101.21	53369.7	373614	1654.33
B10	6	55385.5	7403.58	49927	370568	2134.7
B11	6	63317.8	8454.54	44438.8	348248	2284.12
B12	6	67090.9	8439.07	37524.5	315850	2174.27
C1	6	108895	13635.7	49856.3	381920	3180.43
C2	6	74027	9605.47	49821	369686	2776.79
C3	6	56681.5	7293.07	50312.2	354059	1943.12
C4	6	56244.3	7228.43	52705.4	354323	1861.37
C5	6	50855	7196.93	56098.2	366545	2263.06
C6	6	49597.4	6695.68	56276.4	363195	1623.55
C7	6	171211	20158	63998.5	376043	3104.16
C8	6	56321.8	7435.88	57663.9	377072	1987.56
C9	6	56454	7197.95	54070.8	368056	1525.44
C10	6	56143.5	7503.02	51234.8	365841	1955.17
C11	6	60795.4	7602.65	48438.9	368416	2041.25
C12	6	62271.8	7437.3	40958.1	334478	1891.74
D1	6	61419.8	7912.71	47370.7	378885	4479.01
D2	6	64478.6	8877.86	51700.9	377217	2062.91
D3	6	56618.7	7530.56	51886.7	358027	2222.47
D4	6	63642.8	9021.95	54156.7	351746	2711.19
D5	6	52129.7	7414.32	58026.5	372049	2494.81
D6	6	50846.4	6953.63	57776.6	365209	1424.71
D7	6	54653.1	7445.41	58960.1	373166	1615.53
D8	6	52181.3	6945.3	59353.7	383021	2097.94
D9	6	57319.7	7745.93	57129.4	379221	2335.23
D10	6	99267.6	17956.4	63680.4	392908	4928.16
D11	6	60086.8	8029.05	50374.6	377370	1937.19
D12	6	69596.1	9343.16	45807.8	363544	2533.82
E1	6	99670.2	13744.9	49894.1	376740	3308.13
E2	6	64396.7	7966.81	50092.7	366074	3118.09
E3	6	73008.7	10755.7	53158.3	349066	2754.17
E4	6	64774.6	8942.46	54732	353057	2462.15
E5	6	62673.5	9273.62	63323.2	389404	1791.12
E6	6	50744.7	7165.18	59996.3	381076	2099.61
E7	6	55107.6	7635.29	61864.3	389048	1455.31
E8	6	56536	7961.76	60560.2	388700	1291.48
E9	6	55508.4	7469.46	58154.2	385612	1840.23
E10	6	62479.5	8638.63	54089.7	373041	2108.46
E11	6	74283.1	10502.2	53739.3	390432	2576.61
E12	6	89005.9	12107.5	48475.8	373600	3204.55
F1	6	70738.9	9587.01	44149.1	352713	2559.64
F2	6	62698.9	8142.21	47332.8	354445	2471.12
F3	6	55020.9	7374.29	50875.7	358086	2394.41
F4	6	79803.8	11890.3	53836.4	352065	3989.66
F5	6	83085.8	11598.2	57984.1	373578	3201.13
F6	6	59330	8145.83	60986.8	393606	2497.27
F7	6	57470.3	7897.18	59332.7	382282	2450.42
F8	6	69086.2	9640.19	58739.2	378710	2650.18
F9	6	66710	8741.1	57208.8	382554	1865.22
F10	6	66483.9	9178.5	53691.3	374165	2191.86
F11	6	95854.3	13469.8	52392.2	392639	2768.49
F12	6	92629.4	12544.7	48282.5	382079	3068.97
G1	6	83742.6	11214	46267	373149	3484.9
G2	6	79986.9	10600.3	50442.1	375901	2402.39
G3	6	55787.8	7170.71	49060.1	358981	2086.53
G4	6	53633.7	7431.98	52850.8	368058	2152.05
G5	6	56873.2	7944.36	58962.9	398234	2553.65
G6	6	59022.3	8023.47	57129.2	376140	2261.63
G7	6	56151.9	7504.69	54578.4	359429	1966.61
G8	6	53504.4	7123.54	58866.3	398254	5528.81
G9	6	55882	7452.75	57608.6	399745	2248.67
G10	6	59617.5	8040.84	53035.3	384397	2003.89
G11	6	99204.7	14335.2	54291.2	394645	3814.97
G12	6	77340.2	9915.37	47085	382296	2728.1
H1	6	96267.2	11074.9	43510.1	367094	7038.75
H2	6	106951	15200.4	50145.7	373195	3971.9
H3	6	61968.3	8182.86	50927.4	385269	2405.66
H4	6	59292.5	8244.82	51970.1	377616	2686.27
H5	6	64372	9058.8	59176.7	415564	2691.19
H6	6	63222.3	8575.4	56725	390834	2227.97
H7	6	67307	7769.5	4618.44	5981.12	2011.83
H8	6	87689	13115.3	8998.5	12218.9	5207.8
H9	6	58412	6169.79	3405.97	4747.43	1509.75
H10	6	60763.1	6445.86	3694.53	5280.86	1618.48
H11	6	71795.3	7641.43	4433.94	6349	2178.51
H12	6	86369.4	8658.33	4849.55	7642.12	2450.41
A1	7	134229	16586.8	45966.8	363244	4713.93
A2	7	115022	16767.8	53946.6	404540	7255.24
A3	7	70124.4	9412.69	51656.9	389557	3008.57
A4	7	60214.9	7737.96	53396.1	392058	2048.11
A5	7	54235	7330.03	56412.9	404382	1976.27
A6	7	65315.4	9562.5	57823.4	396452	3294.35
A7	7	57467.7	7656.34	55979.7	393499	1813.32
A8	7	88855	11558.6	56522.9	401459	2374.91
A9	7	73666.9	10130.6	51767.1	373609	3176.53
A10	7	70362.8	8947.63	47342.8	357992	2466.22
A11	7	76346.9	9100.77	45407.5	362853	2427.43
A12	7	74706.1	9553.89	34313.8	294297	2606.6
B1	7	120321	15718.1	46942.1	363068	3753.69
B2	7	77576.1	10918.4	52971.8	401580	3434.69
B3	7	62642.4	8178.41	49261.9	359377	1824.35
B4	7	54554.1	7185.76	52825.3	371296	1823.53
B5	7	59436.3	8172.17	51695.8	346290	2329.18
B6	7	54144.2	7085.55	55052.2	368802	1771.61
B7	7	59298.9	7936.54	57613	384459	1658.62
B8	7	60898.7	12765.2	67868.2	405651	2010.06
B9	7	59741.8	7998.02	53473.9	374733	1851.25
B10	7	55894.9	7296.37	50095.2	370880	1710.74
B11	7	63838	8287.09	44782.3	348673	2303.93
B12	7	67413.6	8357.33	37731.1	316543	2207.64
C1	7	110091	13633	50074.4	382886	3724.05
C2	7	76979.1	9798.84	50364.6	370594	2845.16
C3	7	57112.5	7478.32	50575.7	354643	2212.74
C4	7	56085.5	7410.27	53019.1	355239	2166.68
C5	7	50864.6	7052.42	56271.2	367783	2318.96
C6	7	49738.1	6780.97	56262.4	363606	1712.49
C7	7	171938	20167.5	64030.5	376657	3113.34
C8	7	56906.9	7420.45	57807.9	377850	2307.43
C9	7	56239.6	7164.4	54195.9	369030	1473.24
C10	7	57858.7	7496.68	51362.4	366441	1822.54
C11	7	60952.4	7549.5	48582.4	368480	1697.94
C12	7	62839.1	7309.69	40969.4	334734	2302.82
D1	7	61925.3	7921.61	47693.5	379574	4786.9
D2	7	65015.3	8725.74	51764.7	377876	2119.75
D3	7	57093.8	7635.93	52075.4	359285	2526.07
D4	7	64109.7	8792.07	54260.3	352233	2648.21
D5	7	52461.3	7467.29	57970.3	372431	1953.06
D6	7	51365.3	6926.52	57832.7	365600	1694.64
D7	7	54755.8	7414.38	58847.9	373154	1670.12
D8	7	52811.8	7096.01	59214.6	383747	1889.48
D9	7	57060.2	7628	57032.5	379573	2455.4
D10	7	99702.2	18000.7	63616.3	393208	4939.77
D11	7	60659.8	7880.35	50687.9	377919	1613.78
D12	7	70036.1	9157.91	45718.4	364492	2994.6
E1	7	100632	13454.9	50115.5	378711	2994.36
E2	7	64754.4	8224.62	50029.7	366335	2912.44
E3	7	73818.1	10853.1	53545.7	350463	2985.74
E4	7	65417.9	8962.27	54739.9	353138	2256.41
E5	7	63011.4	9475.67	63287.8	389663	1773.91
E6	7	50688.4	7166.09	60356.1	381189	1707.43
E7	7	55526	7542.5	61661.7	389603	1461.09
E8	7	55378.8	7540.33	60445.9	389200	1780.96
E9	7	55918.3	7402.88	58245.6	386352	1460.45
E10	7	63320.5	8827.12	54208.7	373642	2144.92
E11	7	75872.1	10592.9	53648.2	390890	2496.22
E12	7	90214.2	12452	48445.1	374985	3211.1
F1	7	73437	9662.47	44468.7	354008	2761.69
F2	7	63343.5	8516.43	47751.9	355354	2493.5
F3	7	55033.3	7634.62	51194.6	359103	2350.79
F4	7	115739	16049.5	54212.1	353231	3904.48
F5	7	82583.2	11874.7	58739.1	373962	2821.58
F6	7	64780.6	9037.33	61048.9	394013	1984.52
F7	7	58075.8	7843.56	59445.2	382083	2574.21
F8	7	66881	9338.37	58981.8	379434	2246.14
F9	7	67312.4	9275.96	57194.9	383216	2221.39
F10	7	67217.4	9267.68	53846.7	374781	2547.36
F11	7	99382.6	13940.2	52431.6	392577	2478.23
F12	7	92834	12341.6	48538.7	382264	3046.15
G1	7	83973.5	11174	46456.5	373370	3347.65
G2	7	80004.2	10476.6	50590.5	376653	2380.88
G3	7	52206.9	7042.6	49344.8	360083	2374.33
G4	7	53705	7316.33	53014.4	369217	1836.14
G5	7	57172.5	8290.85	59062.2	398562	2157.6
G6	7	59741.3	8252.96	57407	378258	2025.16
G7	7	57112.6	7491.14	54571.7	359802	2154.09
G8	7	53527.2	7362.97	58982.7	398436	5734.12
G9	7	55844.8	7770.05	57864	400436	2279.57
G10	7	60174.6	8091.67	53261.3	384774	2291.71
G11	7	99528.9	14282.4	54084.4	394922	4072.64
G12	7	78794.6	9732.36	47198.2	382937	2383.07
H1	7	96145.1	11078.1	43616.7	368264	6774.57
H2	7	106717	15197.9	50188.6	374086	4103.46
H3	7	62000.9	8629.82	50724.5	384453	2485.32
H4	7	59467.1	8182.04	52374	378695	2587.51
H5	7	64781.8	9037.95	59271.9	417066	2991.77
H6	7	63426.7	8695.64	56992.3	391473	2315.41
H7	7	67475.8	7729.92	4735.33	6243.47	1775.48
H8	7	88144.3	13053.1	9145.47	12270.9	5130.87
H9	7	58466.3	6185.88	3653.1	4675.78	1625.95
H10	7	61020.2	6468.86	3908.66	5360.06	1915.88
H11	7	72260.9	7718.39	4465.5	5962.09	2061.91
H12	7	86545.8	8544.54	4971.13	8025.72	2033.35
A1	8	135769	16719.3	46169	364201	4546.96
A2	8	116486	17111	54266.5	406396	7305.46
A3	8	70307.6	9212.63	51928.3	391205	2905
A4	8	60275.9	7783.44	53862	393656	1980.89
A5	8	54051.1	7188.39	56869.1	405523	2020.74
A6	8	69609.2	9930.26	58231.3	397912	3374.96
A7	8	57228.5	7562.91	56067.5	394124	2130.07
A8	8	76304.6	9780.53	56616.8	401940	2314.96
A9	8	73289.2	9810.16	51826.1	374349	2998.28
A10	8	69943.1	8996.29	47599.8	359077	2634.25
A11	8	76526.6	9362.46	45514.6	363738	2494.33
A12	8	74622	9591.46	34480.1	294994	2843.46
B1	8	121070	15955	47408.9	364145	4214.07
B2	8	77915.8	10883.2	53377.3	402943	3584.86
B3	8	62939.7	8400.82	49649.4	359921	1839.11
B4	8	54819.3	6983.05	53048.5	372195	1840.77
B5	8	59674.9	8362.21	52290.2	347066	2397.78
B6	8	54295.9	7229.34	54567.8	364535	2130.14
B7	8	59450.4	8112.26	57858.6	385333	1922.18
B8	8	60608.5	12791.7	68027.3	406323	1974.74
B9	8	59910.9	8153.19	53833.4	375272	1887.05
B10	8	56127	7430.17	50273.9	372020	2081.15
B11	8	64280.6	8417.74	44692.5	348789	2369.98
B12	8	67758.7	8308.73	37811.6	317435	2136.31
C1	8	110217	13661.6	50043.6	384036	3073.74
C2	8	84140.5	10905.7	50437.4	371445	2799.58
C3	8	57042.1	7383.84	50666	355246	2161.61
C4	8	57014.2	7422.75	53161.5	356089	1931.47
C5	8	51264.8	7071.27	56375.2	368528	2071.53
C6	8	50361.8	6876.67	56525.4	363886	1877.25
C7	8	172388	19970.1	64245.6	377188	3081.2
C8	8	56750.5	7473.22	57956.2	378224	2217.97
C9	8	57229.6	7281.82	54439.5	369555	1814.33
C10	8	56287.2	7493.97	51359.6	366614	1620.43
C11	8	61649.9	7821.9	48657.5	369080	2166.98
C12	8	63138.2	7545.57	40823.2	335522	1999.58
D1	8	62725.1	8296.47	47669.3	380454	5230.56
D2	8	65306.9	8726.98	51753.7	377984	2230.99
D3	8	57437.3	7486.48	52290.5	359312	2381.29
D4	8	64673.9	8785.08	54212.2	352612	2639.95
D5	8	52618.8	7454.05	58353.3	372823	2241.99
D6	8	51675.8	6979.18	57954.7	365106	1456.51
D7	8	55281.8	7464.81	59211.6	373221	1781.73
D8	8	52892	7227.65	59351.8	383870	2029.34
D9	8	57610.9	7796.88	57441.9	379195	2130.85
D10	8	99988.8	18192	64125.7	392961	5415.8
D11	8	60441.2	7893.56	50877	377983	1809.79
D12	8	70702.9	9453.33	45869	364551	2870.73
E1	8	100935	13387.1	50355.9	379225	3430.03
E2	8	64776.8	8217.4	50273.3	366961	2812.58
E3	8	74248.9	10915.8	53678.6	351564	2695.71
E4	8	65506.7	9109.71	55010.7	353085	1979.84
E5	8	63043.7	9607.61	63054.2	390194	1501.91
E6	8	51245.9	7226.63	60282.1	381491	1957.08
E7	8	55652.8	7389.41	62119.3	389859	1424.45
E8	8	55892.8	7697.61	60753.2	389235	1858.57
E9	8	56068.7	7379.25	58618	386584	2152.8
E10	8	63299	8616.27	54273	373485	2150.13
E11	8	75870	10095.2	53887.3	390930	2440.16
E12	8	87338.6	11957.2	48654.1	375049	3534.08
F1	8	74599.3	10060.7	44565	355361	2702.49
F2	8	62840.3	8296.3	47847.4	356227	2381.63
F3	8	55448	7608.15	51324.1	359495	2384.6
F4	8	85410.9	12165.7	54258	354028	4351.64
F5	8	81786.4	11445.9	58542.3	374552	2782.95
F6	8	62509.2	8623.55	61155.1	394444	1764.76
F7	8	58523.4	8016.63	59592.2	382213	2669.73
F8	8	72513.5	10099.4	59185.4	379874	2544.83
F9	8	67406.6	8925.57	57577.8	383880	2331.24
F10	8	67489.5	9406.66	53973.5	374533	2239.41
F11	8	96871	13759.7	52296.3	393043	2452.62
F12	8	94021.9	12817.5	48785	383032	3430.72
G1	8	84823.2	11515.2	46528.2	374119	2988.4
G2	8	80156.2	10493.4	50794.7	377890	2572.11
G3	8	52368.1	6642.55	49548.5	360772	2421.58
G4	8	54282.1	7325.15	53080.7	369306	2383.86
G5	8	57608.6	8024.48	59196.7	399315	2599.35
G6	8	59909.3	8370.17	57423.7	378716	2425.34
G7	8	57521.6	7586.96	54722.3	359525	2056.45
G8	8	54445.3	7197.7	58984.8	398869	5785.45
G9	8	55801.6	7833.73	58121.6	401310	1925.76
G10	8	60691.7	8304.01	53288.4	384915	1649.82
G11	8	100460	14306.2	54409.5	394845	4341.56
G12	8	79239.9	9995.1	47361.4	383124	2555.58
H1	8	96703.3	11060.4	43636.1	368103	6607.34
H2	8	107404	15106.3	50451.1	374670	4072.57
H3	8	62254.9	8361.41	51057.6	385828	2483.16
H4	8	60092.9	8527.36	52577.5	378995	2785.03
H5	8	64870.7	9033.78	59606.9	417288	2530.34
H6	8	64014.1	8734.15	56960.6	392007	2464.25
H7	8	67811.6	7700.24	4737.23	6109.93	2079.63
H8	8	88669.9	13423.5	9189.74	12441.2	5248.05
H9	8	58732	6292.43	3552.17	4912.4	1469.74
H10	8	61370.1	6691.97	3776.56	5097.84	1933.12
H11	8	72649.7	7670.93	4605.78	6627.05	2174.94
H12	8	87012.9	9044.52	4943.43	8061.88	2187.58
A1	9	136725	16746.1	46632.9	365920	5093.29
A2	9	117085	17142.9	54554.3	406461	7593.95
A3	9	70835.1	9475.76	52266.4	392522	3030.48
A4	9	60243.3	7830.63	53857.6	395097	2317.01
A5	9	54340.8	7389.11	56860.9	406114	1985.02
A6	9	65618.6	9747.75	58496.3	399174	3312.74
A7	9	57849.3	7775.49	56268.8	394106	1743.17
A8	9	133555	17206	56913	401935	2694.89
A9	9	75186.3	10332.3	52038.4	374246	3334.21
A10	9	71991.2	9281.06	47751.6	359502	2937.25
A11	9	76448.1	9480.27	45424.1	363386	2880.85
A12	9	74882.3	9291.99	34654.7	295032	2696.83
B1	9	121673	15879.1	47577.9	365276	4134.61
B2	9	77918.3	11136.2	53278.4	403472	3440.05
B3	9	62849.1	8266.64	49728.4	359946	2190.69
B4	9	55061.7	7054.88	53042.7	372393	1707
B5	9	59470.6	8128.78	52232.6	346839	2583.3
B6	9	54446.8	7112.87	54574.6	364048	1557.39
B7	9	59533.7	8014.38	58123.7	385369	1740.78
B8	9	60968.8	12811.6	68085.6	406216	1826.55
B9	9	60387.1	7966.51	53907.3	375362	1764.18
B10	9	55617.6	7377.85	50181.4	371962	2087.3
B11	9	64035.3	8380.94	44717.5	349155	1971.84
B12	9	67983	8528.54	37687.6	317723	1945.34
C1	9	111390	14043.1	50133.4	384347	3414.14
C2	9	77145.5	10018.3	50550.7	371134	2445.22
C3	9	57091.6	7470.91	50779.8	355152	2373.59
C4	9	56708.2	7281.02	53278.7	355210	1622.47
C5	9	51081.3	7155.31	56476.7	368023	2465.28
C6	9	50397.5	6831.59	56512.8	363801	1720.51
C7	9	172070	20109.5	64293.2	376686	2974.05
C8	9	56923.3	7480.52	58060.7	378187	2082.09
C9	9	57473.7	7450.45	54565.5	369555	1519.14
C10	9	57901.6	7608.03	51391.9	366022	1984.04
C11	9	61477.9	7622.58	48660.8	368863	2150.58
C12	9	63114.4	7576.51	41231.7	333687	2069.36
D1	9	62293.1	7901.27	48016.3	381142	4912.97
D2	9	65418.8	8904.04	52056.8	378397	2025.43
D3	9	57453	7675.71	52180.7	359503	2073.36
D4	9	64405.5	8736.11	54445.4	352626	2416.94
D5	9	52852.6	7666.82	58363.6	372463	2244.77
D6	9	51453.8	6945.11	58080.9	364826	1393.72
D7	9	55572.6	7529.2	59134.9	373036	1560.13
D8	9	53120.4	7159.23	59604.4	383411	2026.67
D9	9	57771.1	7808.2	57319.5	379121	2458.24
D10	9	100510	18206.1	64113.1	392620	4662.02
D11	9	60509.6	7951.94	50813.3	377231	1692.18
D12	9	70712.2	9188.14	45907.6	363907	2836.01
E1	9	100700	13691.1	50580.6	380052	3993.23
E2	9	64942.7	7970.43	50237.7	366769	3025.37
E3	9	74619.2	11272.8	53774	352307	2890.19
E4	9	65525.6	9292.37	55020.9	352579	2377.83
E5	9	63299.4	9424.12	63232.1	389970	1847.02
E6	9	50682	7287.18	60572.5	381508	2101.52
E7	9	55838.1	7677.97	62018.5	389273	1567.18
E8	9	55843.5	7767.17	60806.7	388745	1290.45
E9	9	56223	7446.91	58708.4	386563	1863.7
E10	9	64968.8	9102.94	54450.9	373027	2044.92
E11	9	76041.7	10416.8	53948.4	390586	2484.58
E12	9	85114.7	11699.1	48822.2	374845	2974.25
F1	9	74105.6	10113.8	44794.7	355977	2675.47
F2	9	63278.4	8521.61	47801.5	356466	2952.17
F3	9	55245.3	7567.33	51442.7	359702	2386.78
F4	9	80453.9	11914.7	54291.5	353434	3980.69
F5	9	83153.1	11578.7	58911.5	374466	2397.72
F6	9	64586.6	8780.66	61127.8	393027	2051.98
F7	9	58257.8	7752.33	59795	381669	2109.27
F8	9	71219.6	10013.7	59163.7	379515	2768.57
F9	9	67577	9090.32	57339.9	383714	1871.01
F10	9	67541.8	8990.87	53638.7	373840	2301.68
F11	9	96738.5	13524.5	52651.6	392837	2530.67
F12	9	92465.7	12352.1	48856.4	382539	3112.42
G1	9	85388.2	11347.7	46854.4	374820	3514.5
G2	9	79623.7	10669.9	50892	378697	2660.56
G3	9	52903.9	6975.18	49468.5	361385	2499.97
G4	9	54858.2	7607.09	53396.2	369262	2080.89
G5	9	57711.6	8078.62	59376.1	399065	2177.19
G6	9	60343.7	8400.71	57561.2	378713	2237.38
G7	9	58063.8	7825.09	54679.1	359220	1851.39
G8	9	54960.5	7385.22	58990	398610	5615.75
G9	9	56454.9	7526.31	58161	401086	2439.43
G10	9	61222.4	7951.61	53379.2	384928	2157.03
G11	9	101683	14627.1	54534	394488	3729.92
G12	9	80066.9	10123.8	47469.6	382701	2805.9
H1	9	97861	11728.3	43860.4	369670	7144.14
H2	9	107572	15189	50693.4	375584	4202.98
H3	9	62615.3	8487.45	51266.8	387207	2442.26
H4	9	61017.4	8804.66	52440.5	380253	2640.84
H5	9	65830.5	9322.6	59522.6	417230	2807.8
H6	9	64648.9	8914.51	57249.6	393528	2074.47
H7	9	67588	7797.2	4636.5	6287.99	1742.55
H8	9	89469.1	13634.2	9039.23	12683.9	5124.61
H9	9	59076	6253.22	3486.15	4626.76	1311.62
H10	9	61656.1	6786.27	3819.17	5208.08	1451.46
H11	9	72856.9	7971.05	4507.59	6433	2177.32
H12	9	87157.4	8839.36	5143.5	8063.45	2121.48
A1	10	137257	16571.3	46602.5	366928	4721.95
A2	10	117306	17326.9	54728.6	408145	7488.83
A3	10	70977.2	9432.4	52507.5	393528	2989.65
A4	10	60501.7	7497.7	54079.2	395654	2151.13
A5	10	54258.5	7236.08	56965.2	406774	2155.6
A6	10	67884.3	10032.5	58634.2	400097	3382.74
A7	10	58359.9	7782.26	56440.8	394096	2032.28
A8	10	138897	18846.9	56668.5	401806	2608.21
A9	10	74365.7	10194.7	52477.4	377173	3112.54
A10	10	70938.8	9173.82	47845.8	360762	2651.69
A11	10	76330.4	9634.57	45759	364385	2651.49
A12	10	74703.5	9604.33	34615.8	295262	2663
B1	10	122569	15889.8	47517.8	366083	4625.26
B2	10	78556.9	11063.6	53526.8	404217	3772.58
B3	10	63243.2	8446.77	49589	360076	1928.62
B4	10	55016.4	7170.6	53187.3	372552	1767.73
B5	10	60151.3	8353.23	52165.6	346795	2488.98
B6	10	54303	7278.95	54810	364205	2058.74
B7	10	59840.9	8131.53	58207.8	385733	1991.33
B8	10	60998.4	12591.5	67961.2	405595	1935.11
B9	10	60349.1	7968.88	53846.6	375217	1777.2
B10	10	56349.8	7485.06	50405	371826	2234.76
B11	10	64496.2	8412.22	44681.4	349090	2224.68
B12	10	68297	8718.53	37865.9	317160	2316.93
C1	10	111452	14051.3	50404.1	384744	3705
C2	10	77522	9721.73	50588.9	371294	2734.63
C3	10	57461.7	7333.83	50778.9	354803	2502.82
C4	10	56951.5	7553.79	53178.2	355467	1632.62
C5	10	51082.1	7064.99	56323.6	367893	2752.17
C6	10	50800.7	6865.57	56585.9	363841	1930.47
C7	10	172681	20141.1	64449.1	376938	3201.35
C8	10	57097	7507.31	58010.2	378182	2123.44
C9	10	56710.7	7396.59	54473.6	369565	1658.63
C10	10	58304.7	7811.72	51448.3	365932	1753.97
C11	10	62668.3	7706.74	48772.3	369740	2330.98
C12	10	63077.8	7552.02	41057.7	334258	2061.75
D1	10	62370.7	8089.34	47977.6	381766	4923.88
D2	10	65460.3	8960.15	52058	379026	2827.13
D3	10	57667	7158.55	52498.9	359091	1939.39
D4	10	64645.6	8831.05	54529.1	352411	2519.15
D5	10	53127.8	7685.36	58363.6	372572	2267
D6	10	51836.9	7039.58	57999.3	363792	1386.38
D7	10	55366.4	7245.25	59301.5	371949	1468.07
D8	10	53190	7341.98	59574.2	383691	2128.23
D9	10	57557.2	7922.36	57241.1	378942	1906.6
D10	10	100991	18428.4	64147.4	392407	5147.87
D11	10	60774.6	7890.26	50664.9	377084	1894.72
D12	10	71372.8	9612.25	45886.9	363955	3171.03
E1	10	101694	13601.1	50558.4	380217	3637.7
E2	10	65305.2	8082.47	50509.9	366352	2988.52
E3	10	74847.6	11117.2	54193.1	353066	2858.71
E4	10	66095.2	9202.14	54940.5	352706	2391.32
E5	10	63422.2	9412.78	63287.8	389903	1513.74
E6	10	51071.3	7322.42	60468.1	381564	1730.38
E7	10	56038.3	7793.02	62020.4	388985	1677.12
E8	10	55545.6	7776.25	60929.4	388763	1424.97
E9	10	56106	7472.68	58781.1	386736	1891.44
E10	10	63276.5	8816.47	54299.8	372712	2164.72
E11	10	79821.4	10859.8	54141.4	390465	2454.97
E12	10	85540.9	11506	48785.1	375048	3363.7
F1	10	73674.8	9670.85	44808.8	356732	3035.8
F2	10	63212.1	8613.54	47838.7	356948	2758.26
F3	10	55344.1	7480.19	51405.7	359769	2323.54
F4	10	86599.3	12424.4	54351.9	353623	3637.76
F5	10	85712.6	12021.6	58756.9	374918	2504.54
F6	10	64640.6	9167.03	61258.5	394147	2035.6
F7	10	58424.8	7837.92	59628.7	381132	2340.28
F8	10	72843.4	10116.5	59333.7	379646	2386.25
F9	10	67698.8	9060.16	57605.6	383771	2021.33
F10	10	68168.6	9085.84	53857	373373	2132.99
F11	10	96162.1	13436.8	52704.5	392841	2208.7
F12	10	92938.1	12295.2	48919	382781	2978.8
G1	10	86119.4	11490.6	46904.5	375973	3533.34
G2	10	79699	10725.3	51259.9	379394	2774.11
G3	10	56673.1	7067.33	49680.7	361910	2044.65
G4	10	55429.3	7706.22	53210.1	369299	2280.35
G5	10	58604.9	8239.96	59390	398555	2352.36
G6	10	60805	8582.92	57745.7	379886	2256.58
G7	10	58134.3	7879.29	54880.6	358827	2251.74
G8	10	54780.5	7520.82	59074.2	398222	5730.98
G9	10	56717.2	7680.02	58431.4	401857	1959.86
G10	10	61992.2	8176.38	53448.4	385263	2247.18
G11	10	102395	14834.4	54466.8	394518	3976.33
G12	10	80279	10468	47393	382562	2646.92
H1	10	98885.4	12220.3	44317.3	370943	7165.22
H2	10	107631	15392.5	50543.5	375477	4164.09
H3	10	63324.1	8942.57	51472.9	387916	2654.3
H4	10	61457.2	8775.36	52768.2	380155	2718.87
H5	10	66623	9393.5	59826.9	417168	2805.79
H6	10	65710.7	9179.41	57319.4	394227	2226.1
H7	10	68176.5	7854.58	4758.14	6414.9	2300.48
H8	10	89481.6	13563.6	9167.6	12718.3	5383.12
H9	10	59361	6118.53	3464.45	4733.29	1884.09
H10	10	61939.9	6735.67	3884.16	5044.32	2149.71
H11	10	72837.4	7876.14	4527.46	6495.71	2383.15
H12	10	87540.5	9142.8	5134.27	8036.73	2077.42
A1	11	137175	17119.7	46837.8	368543	4788.74
A2	11	118342	17352.8	55008.3	409673	7891.77
A3	11	71433	9576.29	52453.6	394518	3037.45
A4	11	60672.5	7773.14	54343.6	397222	2217.48
A5	11	54726.3	7328.61	57240.2	408313	1930.34
A6	11	66879.8	9704.52	58923.6	401752	3599.82
A7	11	58172.6	7728.1	56495.8	395196	1887.72
A8	11	117328	15883.7	56930.5	402841	2337.35
A9	11	73800	10025	52766.7	378192	3112.54
A10	11	70892.7	8983.67	47984.8	361679	2537.84
A11	11	77240.4	9485.48	45706	365311	2511.32
A12	11	75668.5	9481.97	34661	296802	3298.01
B1	11	122725	16189.2	47724.3	366281	3940.36
B2	11	78351.9	11316.7	53696.8	405201	3250.19
B3	11	63445.9	8513.86	49857.5	360998	2139.02
B4	11	55762.9	7125.9	53300.6	373834	1986.02
B5	11	60166	8333.03	52356.4	348568	1935.53
B6	11	54577.3	7267.45	54826.7	365661	1903.15
B7	11	60477	8202.43	58144.9	386720	1692.79
B8	11	60984.9	12522.9	67800.3	407088	2158.26
B9	11	60583.8	8073.64	53994.3	376332	1731.63
B10	11	56568.8	7547.67	50451.7	372032	2119.77
B11	11	64845.8	8519.87	44754.5	349509	2091.66
B12	11	68462.7	8455.64	38041	318220	2344.54
C1	11	111605	13612.5	50633.7	385092	3257.91
C2	11	78597.8	9864.08	50475.6	371973	3003.54
C3	11	57705.2	7462.57	50833.5	356203	2110.47
C4	11	57164.9	7508.33	53264.8	356126	1888.12
C5	11	51717.4	7204.78	56507.5	368776	1914.52
C6	11	50307.9	6794.15	56636.9	364942	2065.34
C7	11	173890	20229.9	64421	378121	3198.29
C8	11	57599.7	7465.1	58292.1	379701	2079.56
C9	11	57350.3	7355.98	54502.1	370878	1575.84
C10	11	56508.4	7347.31	51531.5	366771	1913.66
C11	11	61581.3	7620.37	48820.9	369701	2306.93
C12	11	63128.4	7649.98	41241.8	334758	1724.26
D1	11	62911	8009.29	48074.3	381401	5007.52
D2	11	65890.2	9240.7	52136.5	379243	2457.11
D3	11	57872.8	7836.99	52406.8	359511	2230.03
D4	11	65139.8	9054.93	54654.6	353335	2787.59
D5	11	52893.2	7645.63	58517.2	373558	2494.81
D6	11	52044.4	7012.48	57916	364951	1776.2
D7	11	55640.7	7441.53	59130.8	372822	1463.19
D8	11	53490.5	7349.78	59614.4	384509	2227.11
D9	11	58403.7	7824.24	57313.6	379994	2125.18
D10	11	101322	18494.8	64229.6	393502	5126.43
D11	11	60921.5	7797.73	50840.8	377897	1793.45
D12	11	71640.8	9436.75	45863.4	364748	2875.42
E1	11	101518	13691.1	50627.3	380544	3519.19
E2	11	65866.6	8081.26	50339.9	367075	3120.47
E3	11	75165.8	11365.7	54151.1	354424	2727.19
E4	11	66301.6	9144.93	55071.9	353308	2118.12
E5	11	63757.3	9518.96	63533.2	389924	2033.01
E6	11	51558	7291.7	60646.6	382505	1884.39
E7	11	56880.8	7596.32	62030.1	389768	1657.83
E8	11	55575.2	7571.58	60859.2	389070	1696.1
E9	11	56761.7	7612.3	58836.2	387742	1509.52
E10	11	65578.5	9081.64	54535.6	373060	2108.46
E11	11	77253.7	10684.8	53777.9	391062	2894.98
E12	11	87859.8	11976.6	48857.5	375282	3377.74
F1	11	74312.6	9869.27	44584.2	357263	2329.29
F2	11	63505	8484.05	48087.9	357545	2747.07
F3	11	55789.7	7551.89	51727.9	360575	2501.26
F4	11	109978	15601	54542	354202	3989.66
F5	11	90185.7	12710.4	58820.3	374909	2694.31
F6	11	65125.1	8893.01	61342.2	394216	1818.74
F7	11	58952.6	8103.17	59703.7	382158	2157.03
F8	11	74501.5	10388.3	59450.7	380258	2457.93
F9	11	68210.1	9038.11	57474.5	384345	2458.44
F10	11	67897.6	9221.35	53933.6	373317	1771.83
F11	11	95634.8	13536	52839.7	393441	2483.11
F12	11	93344.9	12684	49073.6	382859	3053.76
G1	11	87261.5	11473.7	47118.4	376588	3869.72
G2	11	80418.1	10624.8	51051	380027	2396.42
G3	11	54086.3	7168.46	49527.2	362583	2562.25
G4	11	56459.1	7745.86	53359.8	369935	1898.67
G5	11	59929.5	8235.62	59221.3	399549	2319.72
G6	11	62475.5	8717.86	57714.3	380506	2580.97
G7	11	58959.2	7901.56	54744.4	359616	2047.66
G8	11	56217.6	7527.18	59156.4	399418	5566.52
G9	11	58041.9	7820.56	58445.2	402496	2466.08
G10	11	64365.9	8709.5	53609.6	385203	2015.84
G11	11	104790	15287.3	54708.4	394981	3824.98
G12	11	83175.4	10642	47326.4	383386	2778.84
H1	11	100644	12181.6	44357.5	370067	7144.14
H2	11	108179	15654.6	50535.6	375373	3823.18
H3	11	64932.7	8750.02	51549.8	388195	2486.39
H4	11	63640.1	9193.93	52829.8	381100	2499.62
H5	11	68839.3	9873.14	59839.8	417132	2737.43
H6	11	67540.2	9482.82	57713.5	396695	2166.57
H7	11	68350.6	7888.22	4720.12	5960.28	2229.77
H8	11	89830.6	13635.1	9239.31	12801.2	5220.32
H9	11	59807.9	6215.03	3550.29	5043.43	1759.31
H10	11	62405	6778.22	3954.47	5244.47	1896.49
H11	11	73390.7	7971.05	4582.4	6050.83	2309.38
H12	11	88093.2	8987.63	5006.53	7566.66	2157.68
A1	12	139129	17028.1	47071.7	368901	5253.58
A2	12	118657	17527.4	55171.1	410129	8138.21
A3	12	71078.2	9467.88	52759.3	395321	3030.48
A4	12	61479.1	7697.63	54591.4	398099	1931.13
A5	12	55125.2	7227.54	57468.7	409084	2051.36
A6	12	67279.4	9928.2	59080.8	402269	3515.67
A7	12	57876	7669.2	56515	394966	2222.19
A8	12	81271.5	10147.6	56889	402488	2260.79
A9	12	73704.7	9984.21	52805.3	378584	3051.6
A10	12	70579.1	8998.99	48185.1	361950	2600.27
A11	12	77776.9	9776.37	45690.4	364595	2273.46
A12	12	75477.8	9712.74	34936.7	296693	2849.1
B1	12	122834	16128	47831.9	366920	3893.69
B2	12	78881.8	11127.4	53759.1	405079	3492.61
B3	12	63768.7	8451.36	49863.1	360938	1678.55
B4	12	55727.1	7215.29	53503.1	374097	2213.35
B5	12	60085.1	8475.18	52437.6	348773	2259.8
B6	12	54925.5	7427.06	54974.7	365606	1924.94
B7	12	60209.7	8015.93	58203.7	386684	2089.75
B8	12	61458.4	12547.7	68110.8	406945	1762.79
B9	12	60522.5	8040.56	54130.6	376162	1894.38
B10	12	56540.6	7474.77	50357.5	372133	1859.96
B11	12	64769.1	8538.27	44989.6	349341	2299.22
B12	12	68551.2	8535.17	38059.5	317862	2362.94
C1	12	111862	13890.5	50441.3	384574	3400.17
C2	12	79086.9	10167.8	50654.8	372530	3109.5
C3	12	57902.2	7437.56	50889.9	356067	2215.53
C4	12	57469.9	7650.96	53373.6	356220	1928.7
C5	12	51479.9	7159.23	56591.5	368448	2134
C6	12	50473.8	6742.14	56817.9	364802	1859.76
C7	12	173270	20289.4	64676.7	377824	3043.7
C8	12	57169.4	7659.93	58245	379546	1952.12
C9	12	57091.8	7516.66	54821.1	370707	1520.04
C10	12	57990.2	7631.57	51605.4	367157	1716.97
C11	12	61948.7	7849.58	48953.4	369726	1957.06
C12	12	63782.8	7839.45	41157.3	334581	2139.15
D1	12	62895	7991.5	48213.3	381435	5091.16
D2	12	66120.2	8890.33	52285	378944	2286.62
D3	12	58202.7	7724.09	52384.8	360582	2089.57
D4	12	65197.5	8777.08	54635.7	353139	2413.84
D5	12	53142.7	7357.81	58513.5	373333	2253.11
D6	12	52164.9	7070.55	58026.5	364302	1464.67
D7	12	55887.4	7361.62	59274.3	372060	1668.49
D8	12	53394.7	7232.85	59797.4	384593	2003.51
D9	12	58143.4	7965.76	57533	380073	2356.05
D10	12	101684	18440.8	64470.8	393479	5238.07
D11	12	61409.5	8062.1	51059.6	377689	2102.7
D12	12	71370.8	9364.61	45908.6	364552	2774.07
E1	12	101624	13645.5	50645.1	380496	3502.26
E2	12	65573.5	8068.01	50578.8	366673	3134.73
E3	12	75599.7	11296.3	54427.1	353891	2920.54
E4	12	66242.8	8956.77	55267.9	353118	2282.27
E5	12	63904.1	9390.1	63517.2	389703	1956.68
E6	12	51458.3	7255.55	60845.9	382302	1931.26
E7	12	56898.1	7862.61	62226.9	389562	1748.49
E8	12	57923.8	7927.48	60988.2	389251	1737.5
E9	12	56755.8	7687.48	58918.8	387736	1539.39
E10	12	64034.6	8756.84	54609.6	373355	2575.16
E11	12	77476.3	10618.1	54004.2	391203	2614.68
E12	12	87070.7	11723.3	48957.8	375710	3652.04
F1	12	74143.4	9519.94	44911.5	357070	2424.52
F2	12	64183.4	8443.91	48316	358186	2594.18
F3	12	55644.6	7730.59	51522.2	360607	2276.65
F4	12	93685.4	13510.3	54642.7	354342	3814.83
F5	12	89765.7	12724.6	59020.5	375350	2547.72
F6	12	60299.9	8420.77	61372.3	393828	2114.63
F7	12	59085.4	8190.64	59741.2	381619	2261.33
F8	12	70048.2	9918.47	59396.5	380511	2253.74
F9	12	68903.5	9379.22	57563.8	384166	2422.6
F10	12	68165.4	8897.06	53901.6	373867	1974.49
F11	12	93746.2	13157.1	52713.1	393834	2663.61
F12	12	93272.4	12544.7	48964.4	383593	3276.46
G1	12	88195.9	11880.9	47111.6	377366	3490.28
G2	12	81579.5	10868.3	51340.7	379852	2984.46
G3	12	55056.3	7083.06	49847.1	362769	2338.89
G4	12	58273.8	7989.27	53408	369865	1898.67
G5	12	61579.4	8486.83	59354.7	399021	2017.24
G6	12	64341.8	8997.59	57930.3	380874	2549.64
G7	12	60126.1	8003.19	54943.9	359633	2051.57
G8	12	56716.6	7550.49	59257.3	399017	5498.43
G9	12	58936.5	7969.87	58299.4	402371	2317.94
G10	12	67278.8	9125.15	53486.3	384838	2666.42
G11	12	108152	15749.5	54433.1	394316	4502.92
G12	12	86245	11162	47661	383232	2526.83
H1	12	102016	11828.3	44432.2	370983	7047.18
H2	12	110796	15879.8	50586.3	375467	4114.9
H3	12	67259.9	9095.44	51606.3	388763	2568.19
H4	12	67110.9	9349.85	52881.6	380909	2719.85
H5	12	71939.7	10195.3	59839.8	417361	2405.68
H6	12	70608.5	9906.47	57600.3	397556	2265.18
H7	12	68137.6	7752.68	4653.6	6113.72	2429.3
H8	12	90521.1	13726	9309.25	12872.7	5562.91
H9	12	59761	6184.87	3458.79	4830.38	1550.7
H10	12	62330.3	6683.92	3819.17	5221.99	2207.9
H11	12	73766.1	7708.13	4521.61	6462.58	1983.38
H12	12	88409.1	9061.76	5174.29	7940.83	1951.51
A1	13	139962	16974.5	47062.5	370016	5105.31
A2	13	119684	17296.2	55296.1	410789	8172.08
A3	13	71324.9	9670.9	52812.2	395875	2816.36
A4	13	61002.1	7754.26	54645.5	398788	2264.62
A5	13	54827.1	7345.69	57496.8	409421	2204.44
A6	13	66943.2	9707.27	59477.9	403282	3735.58
A7	13	58259.9	7604.89	56562.9	394993	2327.06
A8	13	89279.8	11737.3	57154.7	402702	2528.04
A9	13	74000.9	9906.29	52882.3	378540	3027.23
A10	13	72484.7	9351.35	48073.5	362203	2572.73
A11	13	77412.5	9461.5	45792.3	364624	2803.34
A12	13	75842	9370.34	34943	297386	2858.12
B1	13	123912	16470	47915.8	367222	4593.73
B2	13	78810.1	11163.7	54014.1	405631	3319.91
B3	13	63800.3	8552.46	49930	361368	2012.6
B4	13	55469.8	7172.99	53683.3	374091	1669.24
B5	13	60392.4	8343.5	52660.6	348984	2184.97
B6	13	54940.5	7312.03	55141	365851	1767.85
B7	13	60635.2	8304.93	58387.2	386633	1713.94
B8	13	61330.8	12611.4	68136	407183	1914.43
B9	13	60859.8	8053.95	54199.5	376501	1753.6
B10	13	56418.4	7334.11	50541.4	371590	1936.32
B11	13	64536.1	8465.58	44876.7	349514	2281.29
B12	13	68589.8	8456.74	38116	317966	2482.58
C1	13	112673	13985.9	50614.5	385291	2894.65
C2	13	77622.1	9808.33	50607.4	372442	3006.96
C3	13	57983	7366.24	51010.4	355800	2302
C4	13	57802.1	7284.59	53357.8	355551	2017.25
C5	13	51552.2	7073.63	56767.9	368091	2282.79
C6	13	50536.1	6831.59	56879.9	364794	1865.59
C7	13	173111	20229.2	64629.1	377671	3063.6
C8	13	57608	7590.93	58227	378980	2152.98
C9	13	57761.1	7499.89	54999.5	370924	1590.23
C10	13	57419.1	7575.44	51649.7	366535	2000.28
C11	13	63262.4	7861.76	49205.1	369822	2238.05
C12	13	63400.8	7942.57	41215.3	334612	2283.79
D1	13	63182.6	8431.16	48069.5	381626	5111.76
D2	13	65724.2	8920.25	52551.2	378702	2331.36
D3	13	58126.5	7413.37	52531.8	360128	2371.57
D4	13	65067.1	9151.87	54888.8	353012	2715.32
D5	13	53211.5	7651.81	58630.5	373290	2283.67
D6	13	52001.6	7071.33	58157.6	364298	1520.12
D7	13	55307.8	7458.6	59163.8	371905	2017.17
D8	13	53550.3	7285.68	59964.8	384443	2065.87
D9	13	58488.4	7921.42	57576.1	379257	2495.14
D10	13	102271	18703.8	64812.3	393746	5056.77
D11	13	61200.8	8151.32	50993.6	377342	1981.83
D12	13	71564.5	9564.48	46015.9	364595	3071.56
E1	13	102161	13695.8	50862.1	380722	3321.68
E2	13	65686.5	8377.62	50441	366484	3150.19
E3	13	75813.6	11196.7	54585	354140	3090.29
E4	13	66234.8	9220.85	55078.7	353555	2371.09
E5	13	63560.7	9516.9	63367.1	389828	1813.69
E6	13	51323.9	7378.45	60806	381665	2470.75
E7	13	57077.7	7753.12	62526.4	388955	1555.61
E8	13	57073.4	7952.68	60990.3	388104	1628.84
E9	13	57283.6	7717.55	58971.7	387414	2287.22
E10	13	64031.6	9036.91	54697.5	372929	2442.86
E11	13	80112	11148.6	54196.1	390913	2576.61
E12	13	86375.5	11745.7	49009.8	375584	3365.57
F1	13	74427.3	9673.65	44930.8	357356	2604.69
F2	13	63832.9	8353.27	48292.5	358221	2995.68
F3	13	56013	7705.22	51671.3	361024	2620.11
F4	13	117988	16172.8	54759	354304	4045.69
F5	13	83390.5	11536.2	59148.3	375808	2919.31
F6	13	59647.1	8205.21	61463.5	393562	2090.54
F7	13	58500	8111.63	59963.2	380801	2402.66
F8	13	69710.6	9834.99	59654.3	380001	2656.7
F9	13	71800.9	9700.6	57656.6	384492	2569.45
F10	13	67739.8	9307.05	54034.1	373573	2143.18
F11	13	93729	13060.5	52917.2	394000	2955.09
F12	13	94009	12480.9	49119	383348	3205.85
G1	13	90227.8	12220.6	46843.6	377781	3592.54
G2	13	83634.1	11115.7	51083.1	380206	2647.41
G3	13	61496	8089.95	49792.7	362506	2562.25
G4	13	61922.3	8490.38	53400.5	369830	2104.61
G5	13	66018	9015.23	59746.6	398648	2667.9
G6	13	68107.5	9550.15	58046.1	380842	2362.69
G7	13	61526.7	8214.21	54895	359489	1975.4
G8	13	58775.6	8071.72	59246.9	398578	5754.03
G9	13	61305.5	8384.89	58535.7	402520	2239.08
G10	13	72881.2	10113.5	53544.7	385259	2102.73
G11	13	114492	16273.7	54549	393813	3890.02
G12	13	90487.9	12140.5	47561.1	383415	2839.73
H1	13	107075	13017.2	44354.7	370800	7269.2
H2	13	113820	16131.7	50644.9	376041	4193.83
H3	13	71398.7	9873.82	51696	389697	2730.73
H4	13	71699.9	10337.7	53118.3	381222	2767.26
H5	13	78513	11085.8	59727.8	417194	2932.46
H6	13	76934.6	10963.2	58152.1	398069	2311.69
H7	13	68530	7848.65	4692.57	6090.99	2066.07
H8	13	90598.9	13695.4	9269.42	12938	5209.59
H9	13	60182.2	6672.38	3610.65	4867.15	1633.57
H10	13	62674.9	6658.62	3774.43	5272.3	1707.92
H11	13	74137.8	7758.15	4452.65	6422.36	2303.43
H12	13	88224.3	8804.88	4989.6	7403.16	2168.7
A1	14	139612	17046.4	47271.3	370489	4970.4
A2	14	119844	18033.3	55492.2	411981	8295.88
A3	14	71585.7	9593.04	52838.7	396284	3011.56
A4	14	60926.8	7815.18	54770.2	399361	1956.45
A5	14	55051.3	7190.52	57615.8	409697	2325.45
A6	14	68228.5	9929.57	59266.1	403664	3597.69
A7	14	58728.8	7841.84	56623.5	395034	2278.87
A8	14	142133	19009	56894.1	402187	2231.89
A9	14	73886.7	10014.1	52832.5	377924	3146.82
A10	14	71057.6	9108.03	48477.7	362907	2583.75
A11	14	77017.6	9570.98	45849.5	364343	2551.67
A12	14	75619.8	9662.3	34865.2	297128	3093.86
B1	14	123916	16118.6	47811.9	367893	4258.22
B2	14	79369.7	11338.7	54075.4	405981	3422.89
B3	14	63565	8380.6	50179	361369	2194.39
B4	14	55549.2	7296.69	53644.4	374615	1775.11
B5	14	60613.9	8613.59	52633.8	349276	2408.69
B6	14	54605.6	7419.15	55038.5	365941	1797.17
B7	14	60479.5	8243.28	58496.6	386853	2044.2
B8	14	61658.8	12603.1	68203.8	406677	2140.16
B9	14	60990.9	7995.66	54231.5	376152	2000.16
B10	14	56390.2	7625.72	50611	371655	2069.74
B11	14	64884.6	8536.43	45001.7	349463	2560.56
B12	14	68765.5	8553.95	38123.6	318115	2043.13
C1	14	113260	14070.3	50420.7	384996	3527.18
C2	14	80374.1	10139.3	50848	371920	2776.79
C3	14	58167.6	7261.58	51112	356383	1967.3
C4	14	57237.5	7483.37	53352.2	355894	1835.54
C5	14	51632.4	7249.55	56631.5	368341	2660.11
C6	14	50716.7	6759.48	56802.4	364198	1663.65
C7	14	172780	20251.9	64771.8	377624	3054.41
C8	14	57805.4	7719.19	58312.7	379214	2412.93
C9	14	57661.1	7453.98	55031.7	371004	1755.83
C10	14	57154.1	7632.48	51617.4	366575	2169.9
C11	14	61739.4	7474.21	48950	369583	1903.49
C12	14	63702.8	7693.8	41178.8	334785	1951.37
D1	14	63150.5	8065.2	48185.5	381699	5119.04
D2	14	65891.4	9119.75	52395.4	379004	2639.71
D3	14	58281.1	7806.88	52508.8	360559	2415.86
D4	14	65289.2	9093.9	54807.2	352668	2518.12
D5	14	53545.6	7606.78	58764.5	373521	1977.14
D6	14	52006.7	7092.23	58052.9	364010	1457.33
D7	14	55744.8	7484.98	59258.6	371739	1803.73
D8	14	53583.9	7312.53	59933.7	384750	1994.6
D9	14	58848.8	7628.94	57525.1	379449	2098.68
D10	14	102586	18880.1	64721	393634	5159.48
D11	14	61459.2	8100.65	51025.5	377324	1645.36
D12	14	71996.4	9792.62	46035.6	364399	2846.33
E1	14	101958	13764.8	50940	381232	3944.7
E2	14	65718.3	7999.34	50483.8	366483	3087.18
E3	14	76154.6	11207.9	54440.8	354627	2515.85
E4	14	66514.1	9109.71	55141	353330	2613.93
E5	14	63435.1	9617.92	63369.3	389435	1949.16
E6	14	51572.5	7311.58	60897.2	381607	1871.95
E7	14	56628.8	7903.44	62207.5	389431	1451.45
E8	14	55608.4	7641.15	61027	388465	1622.63
E9	14	56582.8	7671.37	58970.6	387563	1785.82
E10	14	64156.4	8641.83	54747.9	373111	2581.41
E11	14	79849.5	11148.6	54048.1	390531	2417.95
E12	14	87820.2	12141.5	48912.3	375065	3483.53
F1	14	74835.7	10197.6	45209.3	357414	2204.46
F2	14	63759.1	8626.49	48445	358597	2256.08
F3	14	56395.8	7853.04	51615.8	360490	2233.04
F4	14	82910.4	12100.2	54697.5	354845	3737.5
F5	14	90347.2	12602.7	59282.9	376537	2809.08
F6	14	66363.8	9108.57	61454.1	393118	1928.61
F7	14	59186.4	8088.12	59883.4	381310	2622.94
F8	14	70026.2	9645.54	59527.6	379516	2817.45
F9	14	69935.6	9094.96	57727.4	384584	2046.78
F10	14	68166.5	9078.89	53922.1	373617	2466.98
F11	14	91774.2	12966.4	52906.1	394184	2481.89
F12	14	93803.2	12482.1	48957.9	382958	3300.36
G1	14	94017.7	13108.8	47402.6	377818	3256.16
G2	14	87051.6	11941.6	51227.9	380351	2536.26
G3	14	61195.7	7938.24	49814	363291	2132.71
G4	14	68646.1	9335.13	52438	362800	2345.04
G5	14	73226	10141.3	59496.8	398052	2289.26
G6	14	75598.9	10453.4	58184.5	381446	2295.99
G7	14	66024.2	8886.95	55016.8	359022	1901.19
G8	14	63143	8562.23	59154.3	398502	5698.51
G9	14	65670.6	8681.33	58656	402242	2306.22
G10	14	83668	11510.6	53559.8	385322	1962.62
G11	14	125543	17994.3	54846.6	394438	4425.37
G12	14	102800	14026.8	47697.7	383656	3221.96
H1	14	114956	14446.6	44444.7	370799	7338.06
H2	14	122009	17678.9	50603.2	375859	4133.2
H3	14	79812.1	11155.2	51990.7	389380	2671.53
H4	14	83333.7	11782.8	53001	381613	2856.14
H5	14	90859.5	12626.9	59840.8	416930	2733.41
H6	14	88354.5	12129	58272.6	398844	2174.01
H7	14	68764.2	7778.4	4729.63	6409.22	2106.75
H8	14	90808.1	13781.7	9370.34	13165.6	5554.86
H9	14	60274.1	6345.7	3511.62	4718.2	1683.1
H10	14	62619.5	6747.17	3905.46	5241.26	2068.9
H11	14	74369.3	7927.44	4530.97	6222.4	2086.89
H12	14	88602.3	8746.26	5052.7	8368.45	2154.53
A1	15	140321	17231.1	47502.6	372043	4688.55
A2	15	120142	17704.3	55536.9	412455	7803.01
A3	15	71683.2	9665.97	52977.8	397962	2770.55
A4	15	61334.6	7917.29	54840.9	400914	2245.42
A5	15	55277.2	7304.41	57661.7	410868	2060.83
A6	15	67492	10008.5	59388.9	405443	3695.27
A7	15	58330.7	7864.86	56677.1	395876	2208.72
A8	15	137662	17756	56903.6	402408	2265.84
A9	15	74215.5	10183	52855.9	378826	3267.94
A10	15	71044.8	9049.46	48319.5	363668	2551.61
A11	15	77988.3	9690.87	45778.8	364760	2558.04
A12	15	75459.4	9653.71	34918.8	297728	2923.54
B1	15	124209	16476.6	47979.6	367532	4258.22
B2	15	79746.4	11324.4	54086.1	406093	3326.35
B3	15	64398	8645.28	50143.7	362435	1921.24
B4	15	56069	7114.73	53708.1	374912	1652.01
B5	15	61077.2	8353.23	52851.4	349987	2251.23
B6	15	55293.4	7386.8	55220.7	366879	1740.04
B7	15	60845.8	8109.18	58544.7	387594	1971.8
B8	15	61599.5	12465.8	67952.5	406810	2082.44
B9	15	61217.8	8091.75	54238.9	376979	1884.61
B10	15	56852.6	7745.8	50487.8	371901	1952.12
B11	15	65203.5	8482.14	44998.9	349949	2158.64
B12	15	69190.4	8724.05	38136.7	318580	2147.82
C1	15	112877	14149.4	50737.6	385385	3396.35
C2	15	78777.9	9737.15	50924.3	373337	3011.51
C3	15	58124.8	7533.89	51059.3	356021	2182.06
C4	15	57713.2	7548.44	53341.1	356002	1801.41
C5	15	51869	7121.54	56673.1	368481	2331.29
C6	15	50816.8	6909.95	56853.3	365404	1749.67
C7	15	173260	20298.2	64610.4	378271	3045.99
C8	15	58100.9	7676.16	58443.8	380432	2068.59
C9	15	57166.6	7386.88	54853.3	372032	1688.33
C10	15	57260.5	7520.22	51595.2	367045	1782.84
C11	15	62288.2	7641.41	48975.4	370620	2103.57
C12	15	63810.9	7633.22	41330.1	335442	1728.06
D1	15	63409.9	8408.29	48276.2	382517	4916.6
D2	15	66768.8	9149.68	52404	379340	2639.71
D3	15	58905.5	7605.82	52816	360837	2900.98
D4	15	65384.6	9051.93	54733	353268	2394.23
D5	15	53659.2	7639.45	58617.4	372784	2283.67
D6	15	52064	7080.62	58179.9	364413	1595.15
D7	15	56135.5	7233.62	59351	372109	1755.66
D8	15	53405.4	7378.36	59919.1	385260	2170.1
D9	15	58715.9	7843.11	57654.4	380236	2408.09
D10	15	103231	19023.5	64831.2	394008	5387.22
D11	15	61792.6	8141.41	51079.3	377459	1659.51
D12	15	72378.7	9466.98	46139.2	364464	2953.31
E1	15	102323	13827.9	50968.9	381051	3575.63
E2	15	66071.3	8145.11	50543.2	366692	2916
E3	15	76276.7	11288.5	54661.1	354839	2854.22
E4	15	66584.9	9393.6	55282.6	353354	2170.97
E5	15	63609.6	9390.1	63211.7	389277	1778.22
E6	15	51666.6	7246.51	60866.8	382456	1919.78
E7	15	57039.8	7723.43	62190.1	389595	1825.64
E8	15	57647.5	7939.58	60965.1	388801	1382.55
E9	15	56953.3	7689.62	59026.8	388223	1844.5
E10	15	64758	8863.33	54609.6	373328	2209.51
E11	15	78561.9	10673.9	54207.9	391199	2374.58
E12	15	87026.2	11839.8	49029.3	375292	3516.3
F1	15	74204.9	10013.2	45052.7	357652	2338.3
F2	15	64602.7	8072.28	48360.7	359050	2653.85
F3	15	56365	7785.75	51788.8	360899	2212.32
F4	15	80766.4	11734.9	54685.2	354652	3824.92
F5	15	83355	11472	59477.5	377238	2365.9
F6	15	66152.9	9144.2	61559.4	393571	2345.95
F7	15	59209	8240.49	59756.5	381742	1994.26
F8	15	68741.9	9801.81	59537.3	381094	2613.25
F9	15	71326.6	9526.57	57831.8	385075	2141.6
F10	15	68351.5	9185.45	53932.4	373816	1981.28
F11	15	92549.2	12846.9	53020.5	394294	2648.97
F12	15	92849.2	12616.7	49068.2	384092	3406.82
G1	15	100774	13838.8	47229.3	377849	3480.86
G2	15	93677.6	12759.8	51373.9	380609	2190.84
G3	15	70131.1	9182.24	49999.5	363061	2096.19
G4	15	81771.4	11111.6	52597.4	363801	1948.27
G5	15	87432.3	12069.7	59423.1	399356	2312.11
G6	15	89295.1	12255.8	58270.9	381948	2538.53
G7	15	73027.4	9704.89	54966.9	359698	1987.12
G8	15	71301.7	9537.96	59356	399061	6024.29
G9	15	74029.9	10107.5	58600.7	402582	2118.65
G10	15	103084	14303.9	53857.3	385450	2278.68
G11	15	145381	21459.3	54749.5	394095	3837.49
G12	15	121595	16884.4	47819.2	383731	2861.71
H1	15	129087	16169.5	43773.2	370102	6246.2
H2	15	135268	19643.3	50535.6	376154	3741.96
H3	15	94809.7	13530	51950.1	389769	2823.29
H4	15	102486	14731.6	52886.5	381435	2557.89
H5	15	111456	15477.5	59961.7	417078	2677.11
H6	15	108833	15212.9	58362.3	398917	2033.54
H7	15	69161.8	7755.65	4695.42	6375.13	2073.82
H8	15	91671	13906.1	9459.76	12802.1	5364.33
H9	15	60534.4	6311.53	3700.26	4615.45	1792.64
H10	15	63006.7	6579.26	4130.25	5470.3	1646.5
H11	15	74214.6	7971.05	4651.37	6576.17	2696.06
H12	15	89005.5	9068.66	5004.99	8094.9	2628.25
A1	16	141023	17451.1	47757.7	372720	4791.41
A2	16	120909	18089.9	55651.6	413669	7612.63
A3	16	72504.4	9424.52	52951.4	398139	3021.52
A4	16	61325.5	7776.57	55002.3	401378	2296.05
A5	16	55420	7315.09	58026.2	411946	2051.36
A6	16	71777	10505.9	59718.5	405995	3531.93
A7	16	59946.7	7907.51	56729.2	395983	2358.95
A8	16	82118.5	10386.6	57179.4	402836	2236.23
A9	16	79668.1	11031.4	52945.1	379466	3082.83
A10	16	72370.1	9415.33	48537.2	364292	2913.37
A11	16	77720	9410.42	45832.8	365102	2512.38
A12	16	76218	9556.03	35115.6	297454	3120.93
B1	16	124931	16222.4	48037.2	368451	4158.57
B2	16	79820.6	11554.4	54019.4	406852	3482.96
B3	16	64405.2	8552.46	50215.3	362216	1881.56
B4	16	56366.3	7110.74	53851.9	375620	1761.98
B5	16	61376.3	8406.35	52842.7	350811	2220.83
B6	16	55208.5	7314.18	55407.5	367047	1890.37
B7	16	61034.8	8143.86	58472.1	387931	1768.44
B8	16	61777.4	12692.4	67980.3	407435	1683.53
B9	16	61630.2	8021.65	54302.9	377324	1951.34
B10	16	56702.2	7561.4	50486	371831	2086.42
B11	16	65344.5	8493.18	45168.3	349773	2299.22
B12	16	69813.4	8661.09	38324.8	318993	2305.42
C1	16	113446	14351	50719.6	384919	3650.38
C2	16	81386.1	10043.2	50876.9	373674	2662.85
C3	16	58812.7	7717.28	51121.4	356447	2179.27
C4	16	57133.1	7641.15	53528.1	356440	2061.53
C5	16	51861.9	7241.69	56748.8	369068	2461.17
C6	16	50788.8	6742.84	56919.1	365661	1943.6
C7	16	173317	20228.5	64634.6	378428	3304.67
C8	16	58232.5	7713.5	58544.1	380147	2360.6
C9	16	57968.3	7434.56	55361.8	372542	1622.63
C10	16	58385.9	7563.67	51686.7	367073	1741.33
C11	16	63283.3	7759.89	49069.3	370391	2000.79
C12	16	63781.4	7607.44	41233	336093	2274.9
D1	16	64493.3	8257.07	48209.7	382104	5056
D2	16	67406.1	9453.92	52589.3	379042	2639.71
D3	16	59927.8	7754.2	52895	361133	2395.34
D4	16	65076.5	9318.78	54876.3	353327	2631.69
D5	16	53234.7	7654.46	58805.7	373355	2449.43
D6	16	52357.2	7199.09	58243.4	364323	1747.65
D7	16	56377.2	7446.19	59293.3	372137	1697.82
D8	16	54030.9	7522.13	59991.4	385476	2334.9
D9	16	58770.5	7992.18	57777.8	380329	2343.75
D10	16	103262	18956.2	64897.2	394111	5371.15
D11	16	62056.5	8128.19	51151.9	377648	1774.94
D12	16	72522	9499.15	46082.7	364822	3089.39
E1	16	102876	13719.2	50967.8	380688	3226.87
E2	16	66370.2	8341.48	50531.3	366394	2736.5
E3	16	76880.6	11146.3	54706.6	355030	2708.08
E4	16	66388.4	9049.2	55175	353197	2143.98
E5	16	63632.7	9309.7	63359.6	389973	1593.3
E6	16	51644.9	7359.47	60922.8	382803	1898.73
E7	16	56845.4	7748.48	62346.1	389556	1615.4
E8	16	56810.5	7881.1	60907.4	389225	1654.71
E9	16	57552	7663.85	59017.9	388564	2094.13
E10	16	64354.9	8754.71	54726.5	373542	2565.78
E11	16	78407.4	11023.9	54009.5	390744	2658.05
E12	16	87855.8	11984.3	49149.2	375480	3476.04
F1	16	74928	10173.9	44905.1	357973	2357.6
F2	16	64294.8	8710.66	48332.2	359355	2498.47
F3	16	56748.8	7623.59	51652.8	360822	2651.73
F4	16	91987.8	13157.2	54873	355032	4065.86
F5	16	86569.9	12030.3	59557.6	377507	2932.95
F6	16	62720.1	8524.9	61485.1	393857	1912.23
F7	16	59872.9	8117.27	59987.2	381079	2717.49
F8	16	71008.3	9790.03	59805.9	381054	2643.66
F9	16	71306.5	9477.84	57914.2	384645	2718.63
F10	16	69091.5	9141.44	54015.8	373417	2382.06
F11	16	91744.7	13045.3	53072.1	394582	2336.75
F12	16	92573.3	12332.3	49127.6	383825	2909.27
G1	16	113125	16266.9	47454	377852	3108.15
G2	16	106127	14875.5	51476	380646	2856.58
G3	16	80622.5	10944.3	50197.9	364072	1712.82
G4	16	104718	14512.6	52789.9	364013	2042.07
G5	16	112185	15379.8	59455.1	398752	2368.68
G6	16	112671	15446.1	58294.5	381581	2370.77
G7	16	87173.9	11466.6	55030.2	359525	2021.3
G8	16	86001.1	11264.8	59317.6	398668	5267.98
G9	16	89645	12149.7	58882.7	402893	2117.59
G10	16	135882	18781.2	53927.6	385567	1989.77
G11	16	178958	26271.1	54920.1	394013	3860
G12	16	154240	22505.3	47822.5	384229	2518.38
H1	16	152492	20291.3	44466.9	370442	7477.18
H2	16	160596	23550.6	50691.1	375992	3701.92
H3	16	120506	17134.8	51912.7	389818	2636.01
H4	16	135074	19217.7	53215.2	381645	3020.08
H5	16	147465	20573.1	60211.5	416629	2909.34
H6	16	143319	19777.2	58466.5	399753	2080.05
H7	16	69038.1	7849.64	4633.65	6388.39	2344.07
H8	16	91482.7	13730.7	9589.02	12930.9	5438.58
H9	16	60715.5	6176.83	3549.34	4872.81	1506.89
H10	16	63151.8	6804.67	3882.03	5391.1	1942.82
H11	16	74550.9	8069.8	4444.46	6640.06	2486.66
H12	16	88832.5	8984.18	5180.44	7601.25	2017.61
A1	17	141754	17503.2	47548.9	372593	4705.92
A2	17	121269	18107.6	55825.8	413988	7708.4
A3	17	72078	9788.17	53226.7	398320	2990.64
A4	17	61482.1	7855.51	55204.7	402241	2015.81
A5	17	55489.7	7392.67	58106.8	412081	1968.25
A6	17	67437.4	9738.83	59873.6	406345	3543.96
A7	17	58544.7	7807.99	56727.7	395912	2123.69
A8	17	82733.3	10424.7	57165.6	402920	2291.85
A9	17	71068.5	9630.29	52922.4	379416	3082.83
A10	17	71605.7	9079.2	48533.5	363940	2628.74
A11	17	77883.2	9503.21	45852.6	364776	2803.34
A12	17	76227.2	9550.67	35140.8	298211	3444.64
B1	17	125353	16541.8	48082.2	368213	4116.95
B2	17	80659.3	11376.1	54308.8	406233	3515.14
B3	17	64536.5	8604.84	50216.2	362333	2022.75
B4	17	56023.6	7248.81	53858.5	375263	1419.76
B5	17	61111.6	8528.3	52932.6	350538	2535.75
B6	17	55177.1	7446.48	55314.1	367318	1645.34
B7	17	61032.3	8194.73	58667.9	387616	1755.43
B8	17	62231.1	12737.1	68215.1	407231	1845.5
B9	17	61839.8	8341.45	54366.1	377277	1758.48
B10	17	56416.5	7338.4	50611	372297	2221.59
B11	17	65194.3	8518.95	45243.3	350041	2330.35
B12	17	69609	8608.07	38315	319192	2515.95
C1	17	113499	14432.8	50446.4	385164	3005.15
C2	17	79435.9	10166.6	51033	373191	2767.68
C3	17	58732.8	7676.53	51177.8	356674	2077.93
C4	17	57709.5	7700.87	53594.2	356178	1923.17
C5	17	51991.3	7098.76	56872.8	368330	2337.05
C6	17	50744.7	6903.02	57013.6	365400	1731.45
C7	17	173446	20186.6	64922.2	378497	3104.92
C8	17	58245.7	7641.26	58814.9	380566	2271.98
C9	17	57979.1	7478.7	55271.7	372858	1637.03
C10	17	57601.1	7524.75	51782.8	367394	2061.63
C11	17	61689.5	7571.65	49334.2	370631	2278.5
C12	17	64184.4	7858.79	41230.4	336027	2499.48
D1	17	64879.8	8320.61	48121.4	382142	5304.5
D2	17	67621	9278.11	52421.2	379652	2301.13
D3	17	59778.5	7580.02	52904.8	360775	2341.31
D4	17	65248.5	8889.02	54925.4	352456	2670.92
D5	17	53646.7	7560.87	58908.7	373661	2353.12
D6	17	52413.1	7017.12	58213.7	364277	1644.9
D7	17	56411.2	7514.46	59171.2	372044	1937.34
D8	17	54121	7434.65	60022.5	385235	2142.48
D9	17	58718.6	7777.06	57999.2	380623	2318.2
D10	17	103631	19000.5	64833.9	394572	5863.25
D11	17	62115	8159.03	51242.1	378117	1870.76
D12	17	72437.5	9556.68	46115.6	364811	2913.9
E1	17	103444	14177.5	50938.9	380987	3623.03
E2	17	66890.4	8177.64	50545.6	366629	2684.2
E3	17	77458.5	11341.1	54568	354778	2945.27
E4	17	66473.2	9231.85	55392.5	352779	2396.94
E5	17	63546.8	9607.61	63447.5	390250	1575.02
E6	17	51751.1	7317.9	61094.6	382893	2328.22
E7	17	57310.8	7895.08	62521.6	389738	1718.59
E8	17	56451.7	7849.85	61202.1	389140	1777.86
E9	17	57521.5	7715.4	59135.8	388612	1809.29
E10	17	64855.2	8823.93	54935.5	373599	2241.8
E11	17	78008.8	10781.1	54309.8	390698	2251.89
E12	17	87531.5	11984.3	49155.7	375903	3550
F1	17	76307.2	10417	45120.8	357341	2563.5
F2	17	65316.2	8620.02	48471	358838	2933.53
F3	17	57682.3	7862.97	51779	360743	2578.68
F4	17	86651.2	12240.1	54658.3	354987	4130.86
F5	17	86750.6	11873.6	59661	378332	2452.26
F6	17	60414.1	8414.38	61663.8	393733	1790.79
F7	17	60122.6	8195.34	59971.8	381455	2420.2
F8	17	71213.9	9986.97	59896.9	381064	2291.76
F9	17	73401.5	9639.11	57986.1	384545	2399.47
F10	17	68658.4	9252.62	54124.4	373459	2292.62
F11	17	91298.3	12629.6	53175.4	394801	2727.03
F12	17	92472.8	12049.1	49163.3	384048	3217.8
G1	17	135620	19486.5	47424.2	378299	3468.75
G2	17	128834	18176.6	51222	380609	2345.02
G3	17	106792	14648.2	50146.7	363605	2225.06
G4	17	141128	19280.4	52886.1	364646	2120.78
G5	17	151947	20534.9	59643	398864	2292.52
G6	17	150455	20185.7	58488.9	381207	2255.57
G7	17	110565	14600.9	55100.2	359117	2005.67
G8	17	111828	14959	59253.1	398641	5657.66
G9	17	116001	15882.7	58636.8	403018	2434.1
G10	17	183758	25643.9	53942.7	385666	2142.91
G11	17	226883	33537.8	54621.2	394035	4317.8
G12	17	202016	30349.5	47714.3	384026	3169.53
H1	17	189629	26381.3	43737.2	369534	6614.37
H2	17	200088	29629.8	50729.4	376078	4220.14
H3	17	161771	23452.8	52138	390239	3111.76
H4	17	183140	26020.5	53325.7	381778	2708.99
H5	17	199496	27826	60207.6	416611	2828.91
H6	17	193821	26357.4	58581.6	399971	2493.09
H7	17	69345.6	7955.5	4713.47	6222.64	2035.07
H8	17	91745.5	13999.9	9362.38	12876.2	5136.24
H9	17	61403.4	6592.98	3693.66	5012.33	1543.08
H10	17	63442	6789.72	3940.62	5111.75	1309.22
H11	17	74944.6	8385.31	4583.57	6495.71	2423.6
H12	17	89465.9	8951.42	5043.47	8036.73	2400.04
A1	18	141984	17429.9	47681.1	373288	5228.2
A2	18	122039	18349.4	55901.5	413443	7772.64
A3	18	72834.5	9664.98	53426.7	398097	3131.06
A4	18	61631.6	7870.1	55283.2	401674	1900.57
A5	18	55404	7360.64	57917.5	412135	2038.96
A6	18	67697.4	9972.8	59889.4	406649	3443.55
A7	18	58892.5	7617.75	56702.1	395451	2201.64
A8	18	90638.4	11402.1	57202.7	402763	2318.57
A9	18	72866.9	10006.8	53076.5	379485	2976.95
A10	18	71538.3	9077.39	48592	364191	2563.55
A11	18	77789.6	9738.83	45885.9	364732	2340.36
A12	18	76123.3	9396.11	35198.7	297927	3434.49
B1	18	126150	16568.4	48091	368370	4188.84
B2	18	81983.4	11542.3	54239.9	406585	3560.19
B3	18	65606.8	8905.36	50399.3	362636	2023.67
B4	18	56221.6	7316.64	53778.3	375230	1907.24
B5	18	61003.7	8584.41	53039.8	350016	2179.51
B6	18	55284	7415.56	55494	367183	1996.35
B7	18	61262.1	8145.4	58756.8	387554	1997.02
B8	18	62620.1	12787.6	68185.6	406776	1956.65
B9	18	62169.3	8290.25	54363.7	377404	1753.6
B10	18	56700.3	7308.38	50521.2	371619	2264.6
B11	18	65420.1	8749.88	45187.8	349621	2226.57
B12	18	69747.3	8748.35	38384.6	319191	2490.64
C1	18	114689	14432.8	50587.5	385044	3533.53
C2	18	83437.5	10738.4	51001.8	373086	3101.53
C3	18	59466.3	7724.69	51112	356431	2387.53
C4	18	57193	7522.59	53653.8	355928	1929.63
C5	18	52035	7130.17	56822.8	368206	2443.09
C6	18	50569	7045.86	57083	365347	1866.32
C7	18	173335	20122	64782.7	378314	3210.54
C8	18	58182.3	7601.48	58724	379890	2019.63
C9	18	57965.6	7621.72	55347.1	372896	1719.83
C10	18	57749.5	7657.82	51937.1	366592	1861.33
C11	18	62731.1	7947.02	49151	370592	1891.46
C12	18	63902.2	7567.48	41538.1	335401	1998.31
D1	18	65848.1	8703.09	48219.4	381380	5413.6
D2	18	69290.3	9319.26	52530.4	378855	2402.7
D3	18	61178.8	8124.06	52704.1	361255	2105.78
D4	18	65501.8	9206.84	54816.7	353147	2359.13
D5	18	53424.6	7813.37	58725.1	373477	2530
D6	18	52133.7	7127.08	58405.1	364314	1376.59
D7	18	56765	7657.98	59353.5	371876	1683.97
D8	18	54590.2	7569.77	60129.5	385191	2169.21
D9	18	59364.9	8011.99	57946.3	380650	2222.64
D10	18	103749	19059	65002.9	394112	5478.32
D11	18	61839	8057.69	51354.2	377349	1853.34
D12	18	72398.3	9522.55	46156.1	364005	3151.33
E1	18	103568	14170.5	50905.5	380877	3711.07
E2	18	67730.7	8407.74	50474.2	365760	3296.4
E3	18	78189.7	11907.4	54707.7	354896	3019.47
E4	18	66590.9	9177.94	55146.7	353033	2541.97
E5	18	63848.7	9509.68	63627.5	389293	1688.98
E6	18	51866.9	7305.25	61134.5	382366	1983.87
E7	18	57106.5	7898.8	62357.8	388836	1452.41
E8	18	56725.3	7686.52	61063.7	389040	1675.41
E9	18	57734.8	7527.46	59261.4	388337	1490.32
E10	18	64966.7	8996.44	54861.6	373180	2126.17
E11	18	78538.1	11095	54165	390791	2772.28
E12	18	87786.6	11906.7	49087.9	374887	3234.51
F1	18	76750.6	10102.6	45165.7	357704	2293.26
F2	18	66735.6	9180.7	48493.3	359247	2364.22
F3	18	58415	7977.69	51772.5	360660	2237.4
F4	18	83975.9	11961.4	54864.1	354468	3984.05
F5	18	89444.7	12336.1	59717.7	378765	3071.58
F6	18	59432.2	8264.58	61493.6	393419	2115.6
F7	18	60335.5	8287.52	59901.7	380503	2562.51
F8	18	72835.7	10449.3	59751.7	380872	2870.67
F9	18	71774.4	9731.93	58023.2	385031	2324.3
F10	18	68900	9441.4	54170.1	372698	2097.89
F11	18	90867.9	12716	53290.9	395217	2490.42
F12	18	92359.3	12359	49086.5	384373	3524.15
G1	18	172491	25658.2	47551.5	377614	3463.37
G2	18	165159	23548.3	51262.3	380937	2723.91
G3	18	140477	19338.8	50099.8	363827	2251.91
G4	18	190323	26152.9	52964.2	363973	2190.86
G5	18	205939	27599	59583.2	397833	2657.02
G6	18	202312	26866.7	58350.4	381937	2359.66
G7	18	148107	19392.4	54941	358447	2268.34
G8	18	153590	20506.1	59403.9	398414	5757.17
G9	18	157844	21604	58926.4	403384	2303.02
G10	18	242527	33972.8	53993.6	385800	2160.29
G11	18	287507	42844.6	54992.3	394620	4203.97
G12	18	261414	39732.2	47895.8	383539	2690.89
H1	18	243011	36131.7	44439.2	370092	7229.86
H2	18	253558	38495.3	50870.3	376243	3808.31
H3	18	216835	31886.6	52260.8	390879	2685.52
H4	18	241166	34124.1	53357	381980	2944.04
H5	18	263336	36522	60218.5	416726	2864.1
H6	18	255285	34699.9	58711.1	400277	2294.94
H7	18	69473.7	7734.87	4706.82	6436.69	2074.79
H8	18	91791.5	13858.8	9581.05	13116.2	5510.14
H9	18	61797.8	6344.7	3683.28	4845.47	1784.07
H10	18	63542.3	6874.82	3941.68	5371.84	1781.19
H11	18	74816.6	7869.73	4709.82	6324.15	2547.34
H12	18	89689.3	9227.28	4952.66	7786.76	2359.13
A1	19	141735	17544.1	47859.5	373001	4660.5
A2	19	122759	18145.4	55860.2	413655	8072.8
A3	19	74443.9	9738.9	53213	398476	3098.2
A4	19	61318.4	7882.97	55189	402343	2134.54
A5	19	55600.6	7347.12	58246.5	412716	2377.21
A6	19	70103.4	10274.7	59923.9	407547	3725.68
A7	19	59241.8	7928.5	56677.1	395487	2051.41
A8	19	119659	15265.1	57036.8	402123	2257.18
A9	19	71138.1	9716.95	52994.9	379031	3027.23
A10	19	72192.4	9124.25	48602.1	364436	2393.68
A11	19	78132.6	9734.66	45848.4	364525	2756.61
A12	19	76066.8	9586.09	35016.7	297834	3035.21
B1	19	127929	16850.5	48089.8	368341	4402.01
B2	19	83413.8	11887.7	54028	406816	3429.33
B3	19	67429.7	8869.52	50089.8	363165	2196.23
B4	19	56272.2	7272.75	53820.5	375782	2015.57
B5	19	61275.8	8587.4	52983.8	350781	2522.5
B6	19	55493.1	7399.74	55443.9	367570	1643.83
B7	19	62359.4	8265.63	58493.3	387620	2022.24
B8	19	63182.5	12902.6	67904.7	407626	2213.4
B9	19	62820.6	8478.5	54421.1	377515	2002.6
B10	19	57236	7428.45	50559.9	371421	2427.86
B11	19	65704.3	8665.24	45263.7	349658	2127.51
B12	19	70066.3	8826.78	38203	319086	1899.33
C1	19	115690	14773.4	50479.8	385070	3382.38
C2	19	81039.6	10399.1	50893.1	372945	3053.67
C3	19	59958.2	7787.67	51113.8	356658	2182.06
C4	19	57557.9	7512.79	53488.1	356345	1699.03
C5	19	52020.7	7054	56856.9	368241	2160.31
C6	19	50860.9	6803.16	57030.6	365497	1856.84
C7	19	173762	20202.8	64841.9	378699	3139.36
C8	19	58930.3	7647.75	58619.5	380220	2266.08
C9	19	58839.4	7417.78	55393.1	373417	1942.12
C10	19	57255.8	7493.06	51845.6	367073	2250.2
C11	19	62449.8	7706.74	49220.5	370689	1842.26
C12	19	63968.2	7887.15	41386.8	335712	1866.36
D1	19	68703.7	9161.82	48281	381548	5338.44
D2	19	71016.2	10124.7	52459.2	379263	2330.15
D3	19	63697.4	8395.01	52800.6	360426	2331.59
D4	19	65641.7	9266.81	54922.3	353225	2798.94
D5	19	53803.4	7681.83	58559.4	372939	2259.59
D6	19	52511.7	7108.5	58193.9	364400	1768.04
D7	19	57926.9	7682.81	59228.1	371964	1921.04
D8	19	55732.4	7679.76	60082	385353	1857.41
D9	19	60302.4	8225.21	57809.2	380450	2020.15
D10	19	104325	19342.3	64851.1	394429	5598.89
D11	19	62329.2	8070.91	51223.4	377902	2088.55
D12	19	73037.3	9585.92	46064.8	363850	3205.76
E1	19	105744	14425.3	50838.7	380713	3678.34
E2	19	69463	8636.64	50392.2	365877	3022.99
E3	19	80331.2	11779.8	54427.1	355149	2980.12
E4	19	66931	9289.07	55227.1	353003	2188.95
E5	19	63714.9	9465.36	63335	389296	1859.92
E6	19	51847.6	7107.35	61018.7	383005	1984.82
E7	19	58071	7811.58	62228.8	388283	1687.73
E8	19	57545.2	7839.76	61080.5	388830	1802.69
E9	19	58454.3	7832.46	59052.1	388447	1864.77
E10	19	65280.8	9271.19	54708.2	373891	2359.52
E11	19	78485.2	10806.2	54170.4	390698	2665.45
E12	19	88267.2	11904.8	49078.6	375657	3371.19
F1	19	78602.5	10707.7	45342.8	358143	2273.95
F2	19	68655.8	8960.57	48670.6	359104	2448.75
F3	19	61004.3	8561.24	51891.1	360397	2545.97
F4	19	79330.4	11679.4	54912.2	354491	3934.74
F5	19	91599.5	12807.3	59906.7	379191	2767.04
F6	19	60051.1	8262.75	61394.9	393536	2154.15
F7	19	61555.6	8100.34	59800.8	380641	2240.86
F8	19	69870.3	10152.9	59842.7	380811	2706.66
F9	19	71432.5	9378.06	57833	385133	2244.51
F10	19	69399.5	9301.26	54061.5	373460	2559.81
F11	19	90529.4	12501.2	53244.2	395585	2655.07
F12	19	92891.3	12632.9	49126.5	384079	3501.34
G1	19	223591	34136.7	47509.5	378417	3257.5
G2	19	216041	31156.7	51408.3	380966	2643.83
G3	19	189688	26366.8	50426	363761	2353.92
G4	19	247046	33734.7	52953.5	364842	2327.79
G5	19	266828	35796.7	59592.9	398247	2515.57
G6	19	260283	34220.4	58447.6	382126	2443.53
G7	19	198418	26010.4	55124.2	358999	2090.62
G8	19	209337	27844.7	59638.9	398469	5409.39
G9	19	215910	29309.2	58953	403346	2058.97
G10	19	301382	42402.2	54120.1	385529	2137.48
G11	19	346272	51574.4	55175.4	393874	4554.2
G12	19	320040	49239.8	47937.4	383607	2831.27
H1	19	299788	45785.4	43824.4	370243	6983.94
H2	19	312687	47626.8	50943.5	376351	3927.28
H3	19	277486	40578.2	52320.5	390974	2316.33
H4	19	299076	42332.3	53373.6	381923	2487.77
H5	19	326910	45287.8	60124.3	417326	2719.34
H6	19	315934	43128.7	58810.8	400420	2394.48
H7	19	69327.9	7748.72	4826.56	6478.36	2172.62
H8	19	92178.1	13925.6	9475.7	12988.3	5575.44
H9	19	61681.1	6450.24	3688	4763.45	1792.64
H10	19	63923.2	6639.07	4022.65	5521.68	1711.15
H11	19	75630.8	8091.61	4511.09	6433	2397.43
H12	19	89138.2	8961.77	4766.44	8127.91	2121.48
A1	20	144543	17882.5	47868.7	374071	4894.26
A2	20	124267	18498	55887.7	414704	7784.32
A3	20	75489.4	10196.2	53306.1	399542	3170.9
A4	20	62029.3	7921.58	55347.8	403295	2156.37
A5	20	55657.7	7530.76	58170.4	413603	2049.9
A6	20	68025.5	10065.4	60133.6	408111	3662.75
A7	20	60989.9	8167.48	56791.3	396100	2263.28
A8	20	105586	14358.4	57154	402777	2561.26
A9	20	72956.2	9815.99	52765.2	377585	3191
A10	20	72377.6	9207.16	48759.4	365499	2906.03
A11	20	78588.1	9540.74	45941	366112	2613.26
A12	20	76722.8	9780.37	35246	298860	3221.31
B1	20	131111	17601	48153.6	368959	3876.04
B2	20	87471.6	12411.5	54301.2	407298	3408.95
B3	20	70907.4	9317.09	50374.2	363341	1768.06
B4	20	56771.9	7511.37	53884.1	375556	1821.07
B5	20	61497.3	8456.47	53012.2	351910	2471.05
B6	20	55651.8	7325.69	55583.6	368524	1770.11
B7	20	63641.6	8528.43	58721.7	388475	1752.98
B8	20	65186	13039.1	67938.6	407962	1851.53
B9	20	64313.9	8497.41	54541.8	378657	2027.02
B10	20	57318.8	7603.42	50547.6	372340	2116.26
B11	20	66282.7	8661.56	45158.1	350657	2063.35
B12	20	70247	8696.44	38432.4	319768	2308.87
C1	20	117365	14845.6	50614.5	385433	3824.39
C2	20	84108	10793	50815.6	373034	2800.72
C3	20	62171.2	8286.91	51160.9	356731	2319.66
C4	20	57833	7494.96	53529.1	356852	1675.97
C5	20	52155.7	7247.19	56812	369320	2309.1
C6	20	51048.6	7006.34	57143.6	366499	1874.34
C7	20	174669	20309.2	64865.3	379528	2972.52
C8	20	60018.1	7909.96	58648.6	380563	2105.72
C9	20	60129.3	7802.71	55379.3	374300	1645.13
C10	20	57957.6	7646.05	52080.4	367746	1761.18
C11	20	63240.3	7935.95	49134.4	371760	1910.05
C12	20	64496.2	7929.68	41284.7	336999	1763.59
D1	20	74259.6	9905.18	48198.8	381999	4962.67
D2	20	76370.9	10733.2	52444.5	379726	2431.72
D3	20	68580.2	9046.57	53112.2	361181	2255.96
D4	20	65684.2	9256.81	54934.8	353004	2849.53
D5	20	53973.4	7595.3	58648.3	373862	2324.41
D6	20	52609	7310.6	58099.9	364453	1684.86
D7	20	59428.9	7949.68	59259.5	372469	1688.85
D8	20	57442	7924	60118.6	386396	2046.27
D9	20	61906.1	8294.09	57855.2	381453	2058
D10	20	104590	19035	64961.3	395282	5590.85
D11	20	62950.8	8341.89	51211.3	378761	1585.47
D12	20	73748.4	10036.4	46032.8	364817	2927.97
E1	20	108452	14794.8	50961.1	381079	3158.02
E2	20	72950	9431.75	50376.8	366015	2781.68
E3	20	83322.8	12585.6	54727	355170	3228.56
E4	20	66766.4	9438.72	55376.7	353114	2358.72
E5	20	64138.6	9563.29	63467.9	389521	2039.46
E6	20	52102.7	7414.6	61061.4	383329	2246.91
E7	20	58986.8	8060.24	62211.4	389411	1630.83
E8	20	58725.8	8013.17	61009.2	389533	1637.12
E9	20	59867.8	8095.59	59110.5	389032	1582.06
E10	20	65321.7	9000.7	54768.3	374359	2200.13
E11	20	79526.5	11036	54453.5	391198	2634.78
E12	20	87950.7	12111.4	49306.1	376144	3397.4
F1	20	82928.7	11321.1	45164.4	358216	2596.96
F2	20	72972.9	10028.8	48608.6	359451	2436.32
F3	20	65197	8967.18	51928.1	360707	2205.78
F4	20	81347.6	11530.6	54866.3	354674	3907.85
F5	20	88790.2	12463.4	59775.5	379571	2603.4
F6	20	60537.3	8415.29	61511.4	393646	2218.73
F7	20	63487.1	8804.84	59916.1	381496	2702.87
F8	20	72250.5	10180.7	59880.6	381203	2556.77
F9	20	74193.4	9794.58	57951.3	385750	2383.28
F10	20	69828.3	9271.15	53951.8	373977	2284.7
F11	20	90837.2	12477	53086.9	395333	2635.56
F12	20	93860.5	12707.2	49340.5	384747	3462.23
G1	20	282210	43508.1	47464.8	377860	3907.39
G2	20	274266	39865.6	51295.6	380393	2362.95
G3	20	246752	34457.9	50275.7	364054	2390.43
G4	20	297657	40329.6	53096.8	365622	2380.62
G5	20	321641	42918.2	59792.5	399157	2260.97
G6	20	313054	41118.1	58592.9	383091	2445.56
G7	20	253844	33276.9	55377.5	359435	1714.68
G8	20	269584	35766	59720	398999	5546.62
G9	20	277833	37835.8	58914.7	403917	1512.26
G10	20	348383	49287.6	53978.4	386286	2272.16
G11	20	394101	59304.5	55312.4	394308	4267.76
G12	20	367472	56580.3	48187.1	384160	3084.97
H1	20	350755	54682.4	44023.8	369674	6875.74
H2	20	364853	55932.5	50852.3	376004	4043.97
H3	20	333010	49031.8	52345.1	391090	2485.32
H4	20	346295	49072.3	53447	382760	2879.84
H5	20	378157	52389.5	60244.2	417540	2721.35
H6	20	365987	49481.6	58834.4	401023	1953.54
H7	20	69859.9	7958.47	4811.35	6237.79	2367.31
H8	20	92789.9	14067.6	9637.71	13159.5	5383.12
H9	20	61727	6304.49	3623.86	5158.44	1628.81
H10	20	64211.2	6794.32	4051.41	5283	1837.22
H11	20	75408.9	7879.99	4549.67	6618.76	2478.33
H12	20	89761.6	9089.35	5398.99	7543.08	2560.57
A1	21	147353	18332.3	47965.2	373909	4759.35
A2	21	127130	18665.5	55915.3	414726	7382.55
A3	21	78106.8	10418.9	53345.3	399528	3030.48
A4	21	61663.1	7773.14	55208.2	402951	2097
A5	21	55786.2	7494.46	58221.4	413475	2234.33
A6	21	68146.6	10070.9	60077.5	408619	3802.04
A7	21	63804.8	8557.44	56960.4	395604	2012.44
A8	21	90468.7	11643.8	57163.4	403163	2372.74
A9	21	77179.6	10421.2	53069	379807	2878.68
A10	21	72268.4	9264.84	48789.6	365359	2560.79
A11	21	78152.8	9525.1	46102.2	365620	2605.83
A12	21	76302.1	9787.88	35257.6	298713	3155.89
B1	21	137159	18631	48198.6	368560	4013.52
B2	21	94204.8	13611.9	54361.5	406905	3340.29
B3	21	76716.1	10226	50417.8	363929	1963.69
B4	21	56562.6	7475.46	53973.4	375414	1901.49
B5	21	61728.6	8656.23	53198.2	351603	2287.09
B6	21	56228.8	7322.81	55791.6	368106	1939.23
B7	21	65898.7	8977.74	58748.7	388089	2006.78
B8	21	67359.3	13286.4	68103	407935	2277.15
B9	21	66838	8799.87	54582.8	377906	1914.72
B10	21	57496.4	7704.63	50614.5	372046	2167.17
B11	21	66314.4	8649.6	45181.3	350527	2108.64
B12	21	70785.3	8831.2	38483.5	319746	2140.91
C1	21	121734	15415.1	50828.7	385150	4008.56
C2	21	86468.5	11240.2	50859.5	373870	3106.09
C3	21	66594.3	9000.1	51285.1	356828	2239.71
C4	21	57865.7	7736.53	53728.2	356637	1866.9
C5	21	52241.4	7322.58	56816.2	368662	2058.38
C6	21	51327.9	6805.24	57057.2	365795	1997.55
C7	21	175735	20525.7	65027.4	379091	3133.24
C8	21	61531.4	8246.84	58806.3	380454	2225.56
C9	21	61531.9	7980.16	55474	374017	1682.93
C10	21	58022	7631.57	51921.4	367329	1711.56
C11	21	63142.7	7810.82	49314.4	371346	1954.87
C12	21	64364.2	7577.8	41501.5	336470	2049.06
D1	21	83640.6	11094.6	48306.4	381999	5277.83
D2	21	86219.5	12175.9	52651.9	378864	2451.07
D3	21	77897.8	10295.9	53093.5	361416	2396.42
D4	21	65552.9	9342.77	54938	353314	2872.25
D5	21	53868.1	7798.36	58919	373515	2019.74
D6	21	52569.1	7144.12	58283.8	364863	1673.44
D7	21	62330.2	8249.15	59377.4	371973	1679.08
D8	21	60280.7	8384.77	60353.7	385838	1981.24
D9	21	64844.3	8635.63	58221.5	381034	2251.97
D10	21	104909	19370.7	65255.8	395097	5664.98
D11	21	63817.6	8368.32	51317.9	378256	1762.96
D12	21	74576	10009.1	46100.6	364474	3141.94
E1	21	115516	15759.4	50882.1	381142	3453.73
E2	21	79665	10125.7	50574.1	365925	2813.77
E3	21	90072.7	13014.3	54803.1	355306	2557.44
E4	21	67261.1	9187.84	55287.2	353185	2299.13
E5	21	64140.4	9401.44	63598.6	389351	1700.81
E6	21	52099.4	7208.56	61034.8	382575	2093.87
E7	21	61045.8	8192.92	62347.1	389209	1553.68
E8	21	60922.8	8485.01	61310.2	389418	1771.65
E9	21	61663.7	8204.06	59377.1	388655	2046.12
E10	21	65990.9	9213.69	54830.5	374210	2595.99
E11	21	85150.2	11666	54513.5	390975	2494.1
E12	21	89014.8	11918.4	49317.3	375730	3562.17
F1	21	90740.6	12445.9	45267.1	358019	2586.67
F2	21	80489.3	11160.6	48566.5	358922	2796.8
F3	21	73057.6	10245.7	51876.9	360675	2565.59
F4	21	93385.8	12961.8	54838.4	355194	4051.29
F5	21	83970.1	11787.6	59932.3	379957	2604.54
F6	21	65007.6	8957.86	61575.4	393300	1710.79
F7	21	67232.5	9166.03	59780.6	381288	2433.85
F8	21	78860.3	11040.1	59940.2	380964	2876.1
F9	21	80244.5	10712.3	57859.7	385238	2221.39
F10	21	70691.4	9889.61	54076.4	373813	2268.85
F11	21	93036.1	13049.1	53433.6	395553	2925.82
F12	21	96057.4	13178.5	49481	385178	3271.03
G1	21	337500	52324.6	47607	378476	3540.06
[truncated: 11,351 more rows]

## Sheet: Multicomponent Data
Block Type	96alum
Chemistry	SYBR_GREEN
Experiment File Name	C:\Users\Administrator\Desktop\20211108-GAT.eds
Experiment Run End Time	Not Started
Instrument Type	sds7500
Passive Reference	ROX
Well	Cycle	SYBR	ROX
A1	1	124775	342825
A2	1	106775	383514
A3	1	66923	367326
A4	1	57905.9	369841
A5	1	52209.8	384548
A6	1	62999.9	374594
A7	1	58053.1	372099
A8	1	68349.5	380673
A9	1	67285	355276
A10	1	66170.1	337518
A11	1	72964.3	345726
A12	1	73156.1	281995
B1	1	114457	344283
B2	1	72135.4	377632
B3	1	59262.5	347754
B4	1	52516.8	356012
B5	1	56565.8	335319
B6	1	52333.9	354430
B7	1	57771.2	370668
B8	1	58883.7	392392
B9	1	56915.7	358409
B10	1	54835	354994
B11	1	61505.7	339666
B12	1	64482.7	303979
C1	1	103123	364619
C2	1	71293.5	353372
C3	1	54714.7	342754
C4	1	54125.3	343326
C5	1	49239.8	354176
C6	1	48480.2	352128
C7	1	173603	366746
C8	1	55290.5	363592
C9	1	54411.1	357231
C10	1	53958.9	352143
C11	1	59342.7	355243
C12	1	59953.9	324549
D1	1	58596.5	361127
D2	1	61278.1	367112
D3	1	53955.8	349369
D4	1	60213.2	340280
D5	1	49716.1	357313
D6	1	48823.8	358462
D7	1	52616.3	363807
D8	1	50593	371718
D9	1	54279.6	365922
D10	1	99285	383326
D11	1	57412	364457
D12	1	67055.7	354129
E1	1	95753.6	360302
E2	1	62418.3	354303
E3	1	70127.1	338616
E4	1	60750.5	338370
E5	1	58357.7	370975
E6	1	48916.4	369485
E7	1	52894.7	376113
E8	1	54677.4	376086
E9	1	53518.7	371854
E10	1	60446.8	361607
E11	1	71638.3	377872
E12	1	80893.1	361130
F1	1	67290.4	337029
F2	1	59936.7	339401
F3	1	52930.9	343790
F4	1	83304.9	337586
F5	1	82788.1	359406
F6	1	54595.9	379030
F7	1	55703.9	369129
F8	1	68196.2	363793
F9	1	65279.3	366084
F10	1	64181.9	362087
F11	1	83557.5	378537
F12	1	90802.8	374209
G1	1	78089.9	354339
G2	1	79151.8	358463
G3	1	52041.3	347553
G4	1	51248.5	352955
G5	1	54453	380874
G6	1	56682.2	359806
G7	1	54109.3	344984
G8	1	52462.3	384339
G9	1	53355.9	383321
G10	1	57981	370868
G11	1	93449.9	384829
G12	1	76229.3	373096
H1	1	93991.5	349907
H2	1	108363	357828
H3	1	60141.4	368693
H4	1	56987.7	360852
H5	1	63162.7	398582
H6	1	62389.8	375247
H7	1
H8	1
H9	1
H10	1
H11	1
H12	1
A1	2	127871	349932
A2	2	107594	392100
A3	2	67548.7	376572
A4	2	57951.8	379078
A5	2	52424.3	394267
A6	2	63612.6	386333
A7	2	54494.3	382609
A8	2	103182	391889
A9	2	70188.8	363609
A10	2	66661.5	346627
A11	2	73398.1	353635
A12	2	72193.1	286534
B1	2	113596	352493
B2	2	73434.5	386864
B3	2	59188.4	353478
B4	2	52826.9	363244
B5	2	56734.5	342389
B6	2	52705.7	361492
B7	2	57740.2	377524
B8	2	59116.3	400261
B9	2	57053.2	367769
B10	2	54812.3	363310
B11	2	61632.3	345632
B12	2	64404.6	310343
C1	2	104260	373009
C2	2	73570.7	360779
C3	2	55065.7	348686
C4	2	54445.9	350507
C5	2	49251.4	361719
C6	2	48397.9	358759
C7	2	173276	372449
C8	2	54517.8	372193
C9	2	54687	364227
C10	2	54663.3	360311
C11	2	59275.8	363781
C12	2	60477.8	329818
D1	2	58979.6	369685
D2	2	62200.7	374424
D3	2	54394	355336
D4	2	60290.6	347221
D5	2	50026.4	366360
D6	2	49255.1	363099
D7	2	52635.9	369647
D8	2	50766.5	379096
D9	2	55020.1	374605
D10	2	99126.6	391250
D11	2	58075	373681
D12	2	67501.8	359018
E1	2	95343	368184
E2	2	62948.3	361065
E3	2	70635.1	344884
E4	2	61678.4	347551
E5	2	60538.9	384635
E6	2	49254.3	376813
E7	2	52992.3	384825
E8	2	55086.2	384285
E9	2	53660.1	382113
E10	2	59973.8	369569
E11	2	72678.1	386519
E12	2	84337.1	368178
F1	2	67416.8	344354
F2	2	59803.7	345707
F3	2	52899.3	350874
F4	2	91265.3	345473
F5	2	79184.1	368256
F6	2	55054.4	387616
F7	2	55811.4	377903
F8	2	64744.6	373326
F9	2	64627.1	377121
F10	2	64730.2	370259
F11	2	88744.4	386623
F12	2	90117.8	374351
G1	2	79275.2	362255
G2	2	77926.4	367125
G3	2	50552.7	353850
G4	2	51839	361168
G5	2	54485.3	391578
G6	2	57089	369550
G7	2	54458.3	354302
G8	2	52583.9	393239
G9	2	54034.2	392193
G10	2	58322.4	379037
G11	2	95098.4	392105
G12	2	76143.7	378287
H1	2	92874.4	355809
H2	2	106456	365298
H3	2	60660.3	377077
H4	2	58488.5	368575
H5	2	63278.8	406476
H6	2	61816.6	382560
H7	2
H8	2
H9	2
H10	2
H11	2
H12	2
A1	3	129141	355605
A2	3	108896	396195
A3	3	67782.8	380866
A4	3	58471.1	383571
A5	3	52867.5	398402
A6	3	63892.9	390496
A7	3	56720.9	387008
A8	3	69696.4	396291
A9	3	68976.1	368018
A10	3	66267.8	350675
A11	3	73710.2	357561
A12	3	72366.9	289978
B1	3	113612	356264
B2	3	74131.6	392562
B3	3	59446.4	355463
B4	3	52960.3	366784
B5	3	57303	345396
B6	3	52958.5	364254
B7	3	58085.2	381362
B8	3	59923.3	403497
B9	3	57797.1	371234
B10	3	54902.4	366518
B11	3	61810	346752
B12	3	65034.9	312545
C1	3	104804	377255
C2	3	73175.9	365429
C3	3	55386.7	350972
C4	3	55012	353189
C5	3	49718.6	365425
C6	3	48497.4	361063
C7	3	172300	375274
C8	3	54829.9	374825
C9	3	55376.9	366903
C10	3	53839.8	364018
C11	3	59930.5	366842
C12	3	60544.8	333727
D1	3	60200.5	373850
D2	3	62915.5	377519
D3	3	54849.8	357007
D4	3	61935.3	350976
D5	3	50526.6	370349
D6	3	49919.8	366170
D7	3	53350.5	372851
D8	3	51132.1	381440
D9	3	55690.3	378237
D10	3	97651.8	393133
D11	3	58039.2	375867
D12	3	67958.2	362499
E1	3	96808.9	372866
E2	3	63339.9	364267
E3	3	71775.7	347935
E4	3	62803.6	352070
E5	3	61108.7	388908
E6	3	49216.3	379364
E7	3	53878.7	388788
E8	3	55163	387779
E9	3	54549.6	384846
E10	3	61457.5	371915
E11	3	72842.7	389102
E12	3	81724.7	372540
F1	3	69757	348402
F2	3	60171.6	349724
F3	3	53969.4	353876
F4	3	101122	348656
F5	3	79083.7	371862
F6	3	55205.3	391895
F7	3	56469.5	381153
F8	3	66323.8	376730
F9	3	64722.8	380772
F10	3	64836.1	373199
F11	3	91471.1	389631
F12	3	91899	379204
G1	3	79794.2	367269
G2	3	78868.2	371284
G3	3	51089.7	355811
G4	3	52069.4	365039
G5	3	55223.4	395724
G6	3	57702	373378
G7	3	54745.7	357429
G8	3	52485.9	396580
G9	3	54186.1	394680
G10	3	58645.2	381890
G11	3	95461.7	393801
G12	3	77143.4	380879
H1	3	93309.1	362165
H2	3	105657	369225
H3	3	60429.9	381249
H4	3	58006.5	373354
H5	3	63863.8	412003
H6	3	62197.5	387538
H7	3
H8	3
H9	3
H10	3
H11	3
H12	3
A1	4	129590	359192
A2	4	109113	399703
A3	4	67931.7	385209
A4	4	58411.2	387550
A5	4	52863.4	401477
A6	4	64111.7	393588
A7	4	57234.6	390461
A8	4	72751.1	399321
A9	4	72767.2	370812
A10	4	67390.9	354248
A11	4	73399.9	360488
A12	4	72521.7	291957
B1	4	115543	359863
B2	4	74780.6	397157
B3	4	60331.7	357291
B4	4	53526.7	369267
B5	4	57912.2	347007
B6	4	53261.6	366735
B7	4	58429.9	383406
B8	4	60269.9	406064
B9	4	58231.1	373722
B10	4	55004.9	369865
B11	4	62288.3	348060
B12	4	64672.7	315291
C1	4	105658	379875
C2	4	75415.4	368307
C3	4	56173.5	353500
C4	4	55491.3	355124
C5	4	50443.7	367673
C6	4	49098.9	363183
C7	4	171848	377003
C8	4	55299.2	377238
C9	4	55372.1	369051
C10	4	55557.5	366559
C11	4	60585.3	368598
C12	4	60433.1	335182
D1	4	60923.1	376955
D2	4	63250.6	379446
D3	4	55738.5	358300
D4	4	62101.8	352293
D5	4	51300.9	372524
D6	4	50588	367091
D7	4	53871.9	374304
D8	4	51730.9	383675
D9	4	55921.2	379995
D10	4	96617.3	394965
D11	4	59128.4	377902
D12	4	69237.5	363917
E1	4	97365.5	375320
E2	4	63642.4	365916
E3	4	72057.8	348970
E4	4	63591.5	353769
E5	4	61707.8	390948
E6	4	49649.9	381074
E7	4	54278.9	390272
E8	4	53523.1	389772
E9	4	55291	387164
E10	4	62759.8	373287
E11	4	75178.4	390903
E12	4	84318.1	373786
F1	4	68667.6	350789
F2	4	61073.5	352067
F3	4	53910.2	357199
F4	4	74472.9	351224
F5	4	78456.5	373869
F6	4	57858.9	394045
F7	4	57126	383201
F8	4	69101.9	378451
F9	4	65474	382378
F10	4	65332.3	375085
F11	4	93878.8	391679
F12	4	91093	381982
G1	4	80442.6	369569
G2	4	79040.5	373254
G3	4	51503.9	357373
G4	4	53018	367539
G5	4	56246.7	398320
G6	4	58256.9	375660
G7	4	54961.8	359256
G8	4	53161.4	398275
G9	4	54660.8	398324
G10	4	59562.1	384242
G11	4	96418.7	395093
G12	4	76479.5	383150
H1	4	94585.6	364598
H2	4	105043	371195
H3	4	61373.4	383461
H4	4	59411.3	375692
H5	4	64222.8	414205
H6	4	63288.6	389959
H7	4
H8	4
H9	4
H10	4
H11	4
H12	4
A1	5	130982	361007
A2	5	110447	401958
A3	5	68142.8	387366
A4	5	58879.6	389846
A5	5	53416.8	402593
A6	5	64824.4	394870
A7	5	56611.3	392385
A8	5	79999.4	401419
A9	5	70384.9	372576
A10	5	67333.8	355988
A11	5	74598.2	361925
A12	5	72042.1	293739
B1	5	116098	361189
B2	5	75246.7	399586
B3	5	60185.7	358260
B4	5	53662.5	370249
B5	5	57951.5	345222
B6	5	53770.6	367418
B7	5	58801.7	384448
B8	5	60445.9	406964
B9	5	58559.8	374864
B10	5	55261.5	371137
B11	5	62566.1	349001
B12	5	65355.7	315838
C1	5	106273	381979
C2	5	73204	369831
C3	5	55804.8	354136
C4	5	55377.6	355631
C5	5	50435.9	368239
C6	5	49909.4	364563
C7	5	171998	377952
C8	5	55589.9	377825
C9	5	55492.3	369546
C10	5	55085.1	367227
C11	5	60174.9	368659
C12	5	60995.5	336188
D1	5	60914.2	378240
D2	5	63698	379781
D3	5	56448.6	359426
D4	5	62216.9	352580
D5	5	51566.5	373573
D6	5	50702.6	367052
D7	5	54414.3	374745
D8	5	51705.6	384074
D9	5	56337.2	380188
D10	5	96209.4	394880
D11	5	59576.8	378195
D12	5	69471.4	364668
E1	5	97463.4	377388
E2	5	64230.2	367017
E3	5	72745.7	349687
E4	5	63792.2	354016
E5	5	61803.1	391311
E6	5	50226	381218
E7	5	54666.9	390800
E8	5	53581.8	390290
E9	5	55487	386630
E10	5	61517.3	373969
E11	5	74018.8	391834
E12	5	86732.3	374938
F1	5	68121.5	352681
F2	5	61506.6	353740
F3	5	54308.9	358752
F4	5	90135.4	352498
F5	5	80929.3	374619
F6	5	59916.5	394844
F7	5	57527.9	383502
F8	5	65403.9	379557
F9	5	65889.8	383414
F10	5	66268.5	376169
F11	5	94319.5	393189
F12	5	91607	382551
G1	5	81427.2	371732
G2	5	79962.9	375658
G3	5	53333.9	359041
G4	5	53181.2	368921
G5	5	56232.5	399435
G6	5	58579.8	376497
G7	5	55616.6	359919
G8	5	53923.7	399087
G9	5	55241.1	399130
G10	5	59785.5	384744
G11	5	96420.8	395121
G12	5	77361.1	383571
H1	5	94980.3	367783
H2	5	107491	373218
H3	5	61161.1	385645
H4	5	58963.1	377642
H5	5	63652.4	416479
H6	5	63238.9	390917
H7	5
H8	5
H9	5
H10	5
H11	5
H12	5
A1	6	131428	362458
A2	6	110866	404196
A3	6	67843.2	388857
A4	6	59069.6	391450
A5	6	53278.3	403967
A6	6	64810.3	396719
A7	6	57620.2	393328
A8	6	109140	401779
A9	6	72598.9	373673
A10	6	67633.4	357197
A11	6	74035.8	361864
A12	6	72228.9	294173
B1	6	116937	362805
B2	6	75702	401084
B3	6	60220.2	359064
B4	6	53666.3	371481
B5	6	58428.3	346273
B6	6	53645.7	368889
B7	6	58967.3	385129
B8	6	60375.7	407372
B9	6	59447.4	374760
B10	6	54964.1	371505
B11	6	62598.8	349059
B12	6	65232	316513
C1	6	107704	383091
C2	6	72988.1	370721
C3	6	55912.4	355172
C4	6	55836.3	355583
C5	6	50753.3	367902
C6	6	49673.3	364591
C7	6	171148	378144
C8	6	55407.4	378492
C9	6	56212.2	369269
C10	6	55914.1	366902
C11	6	60682.8	369336
C12	6	61152.3	335223
D1	6	60897.9	379789
D2	6	63861.8	378366
D3	6	56147	359255
D4	6	62557.4	353148
D5	6	51888.7	373518
D6	6	50661.5	366780
D7	6	54619.5	374674
D8	6	52127.2	384502
D9	6	56748.6	380602
D10	6	96664.4	394936
D11	6	59699.7	378385
D12	6	69050.6	364436
E1	6	98128.5	377933
E2	6	64348.4	367216
E3	6	72919.4	350544
E4	6	64061.9	354498
E5	6	62198.1	391221
E6	6	50588.1	382537
E7	6	54819.3	390612
E8	6	56438.1	390206
E9	6	55369.8	387044
E10	6	62346	374345
E11	6	73766	391654
E12	6	87150.9	374659
F1	6	68598.6	353632
F2	6	62033.3	355439
F3	6	54832	359243
F4	6	79720.1	353443
F5	6	82590.6	375012
F6	6	57381.9	394976
F7	6	57209.1	383660
F8	6	68750.5	380163
F9	6	66452.5	383931
F10	6	66106.4	375427
F11	6	95574.8	393765
F12	6	91310	383096
G1	6	82230.5	374166
G2	6	79743.8	377071
G3	6	55841.6	360043
G4	6	53475	369225
G5	6	56607.9	399561
G6	6	58686.6	377486
G7	6	55756.3	360726
G8	6	53349.2	399575
G9	6	55636.7	401056
G10	6	59373.1	385576
G11	6	97192.7	395928
G12	6	76683.1	383282
H1	6	95418.7	368037
H2	6	105142	374465
H3	6	61915.3	386385
H4	6	59349.9	378760
H5	6	64483.2	416932
H6	6	63391.8	392160
H7	6
H8	6
H9	6
H10	6
H11	6
H12	6
A1	7	132279	364338
A2	7	111737	405481
A3	7	68570	390646
A4	7	59521.6	393161
A5	7	53942.2	405557
A6	7	65346.8	397823
A7	7	57223.5	394694
A8	7	88359.2	402668
A9	7	72221.6	374678
A10	7	68813.2	358962
A11	7	74943.2	363734
A12	7	72600.5	294917
B1	7	118134	364163
B2	7	76907.5	402634
B3	7	60733.1	360407
B4	7	53963.7	372439
B5	7	59344.6	347534
B6	7	54155.3	370074
B7	7	59181.8	385782
B8	7	61239.2	407956
B9	7	59402.6	375876
B10	7	55449.8	371831
B11	7	63083.3	349515
B12	7	65530	317220
C1	7	108871	384069
C2	7	75911.2	371676
C3	7	56358.3	355779
C4	7	55698.8	356524
C5	7	50746	369142
C6	7	49821.4	364995
C7	7	171867	378752
C8	7	55981.5	379276
C9	7	55996	370244
C10	7	57602.6	367508
C11	7	60830.1	369414
C12	7	61687.2	335479
D1	7	61394.1	380504
D2	7	64370.1	379023
D3	7	56625.8	360519
D4	7	62993.6	353639
D5	7	52221.7	373886
D6	7	51172.3	367172
D7	7	54718.2	374649
D8	7	52765.9	385200
D9	7	56479	380938
D10	7	97095.9	395224
D11	7	60244.9	378960
D12	7	69454	365367
E1	7	99024.8	379906
E2	7	64731.9	367467
E3	7	73728.4	351967
E4	7	64700.6	354579
E5	7	62551.5	391472
E6	7	50532.4	382693
E7	7	55224.6	391134
E8	7	55251	390685
E9	7	55768.4	387784
E10	7	63197	374952
E11	7	75341	392097
E12	7	88376.6	376026
F1	7	71248.6	354946
F2	7	62712.3	356382
F3	7	54872	360284
F4	7	115701	354618
F5	7	82118.6	375483
F6	7	62865.2	395382
F7	7	57804.2	383478
F8	7	66535.9	380905
F9	7	67102.4	384584
F10	7	66839.9	376053
F11	7	99107.6	393707
F12	7	91482.4	383304
G1	7	82450.4	374401
G2	7	79744.8	377830
G3	7	52293.3	361164
G4	7	53532.1	370387
G5	7	56938.7	399896
G6	7	59418.1	379607
G7	7	56705.5	361093
G8	7	53396.1	399768
G9	7	55633.2	401767
G10	7	59928.4	385974
G11	7	97503.4	396182
G12	7	78083.8	383927
H1	7	95298.4	369207
H2	7	104906	375353
H3	7	62000.9	385557
H4	7	59515.1	379870
H5	7	64885.6	418426
H6	7	63606.5	392821
H7	7
H8	7
H9	7
H10	7
H11	7
H12	7
A1	8	133789	365305
A2	8	113204	407345
A3	8	68713	392304
A4	8	59585.9	394791
A5	8	53741.7	406734
A6	8	69611	399309
A7	8	56975.9	395322
A8	8	75805.8	403154
A9	8	71803.2	375416
A10	8	68407.1	360061
A11	8	75159.1	364621
A12	8	72523.2	295625
B1	8	118896	365275
B2	8	77233.2	404024
B3	8	61052	360986
B4	8	54197.4	373350
B5	8	59602.6	348370
B6	8	54322.6	365811
B7	8	59351.7	386672
B8	8	60956.1	408637
B9	8	59588.3	376450
B10	8	55694.3	372977
B11	8	63535	349621
B12	8	65854.1	318111
C1	8	108995	385204
C2	8	83089.3	372523
C3	8	56276.1	356384
C4	8	56615.8	357378
C5	8	51142.8	369888
C6	8	50448.3	365302
C7	8	172290	379301
C8	8	55831.9	379662
C9	8	56986	370790
C10	8	56053.9	367678
C11	8	61551.1	370015
C12	8	62012.5	336244
D1	8	62229.3	381373
D2	8	64657.1	379129
D3	8	56948.4	360569
D4	8	63549.5	354007
D5	8	52376	374319
D6	8	51485.7	366700
D7	8	55244.2	374760
D8	8	52858.5	385338
D9	8	57042.2	380613
D10	8	97402.6	395040
D11	8	60031.4	379044
D12	8	70149.1	365440
E1	8	99310.8	380439
E2	8	64753.1	368112
E3	8	74159.6	353068
E4	8	64803.3	354558
E5	8	62594.9	391966
E6	8	51090.3	382981
E7	8	55336	391442
E8	8	55775.4	390757
E9	8	55914.9	388057
E10	8	63152.4	374805
E11	8	75278	392161
E12	8	85487.9	376112
F1	8	72435.1	356295
F2	8	62188.1	357255
F3	8	55278.5	360685
F4	8	85294.4	355425
F5	8	81286.6	376040
F6	8	60572.8	395820
F7	8	58264.1	383624
F8	8	72188	381364
F9	8	67159.1	385283
F10	8	67124.4	375821
F11	8	96610.8	394154
F12	8	92710.3	384089
G1	8	83328.1	375150
G2	8	79895.5	379075
G3	8	52406.7	361866
G4	8	54103.5	370482
G5	8	57342.6	400654
G6	8	59595.3	380061
G7	8	57120.5	360837
G8	8	54287.4	400195
G9	8	55596.5	402659
G10	8	60462.7	386115
G11	8	98423.3	396138
G12	8	78556.4	384128
H1	8	95842.4	369048
H2	8	105567	375955
H3	8	62218.9	386951
H4	8	60171.7	380189
H5	8	64973.1	418682
H6	8	64191.4	393344
H7	8
H8	8
H9	8
H10	8
H11	8
H12	8
A1	9	134716	367052
A2	9	113792	407437
A3	9	69263.5	393641
A4	9	59558.7	396215
A5	9	54053	407317
A6	9	65669.3	400586
A7	9	57613.8	395326
A8	9	132973	403177
A9	9	73736	375337
A10	9	70448.7	360498
A11	9	75103	364265
A12	9	72720	295678
B1	9	119467	366412
B2	9	77271.3	404537
B3	9	60945	361020
B4	9	54444.6	373546
B5	9	59373	348139
B6	9	54457.5	365330
B7	9	59422.3	386739
B8	9	61313.5	408538
B9	9	60032.9	376546
B10	9	55187.1	372910
B11	9	63288.9	349985
B12	9	66106.3	318384
C1	9	110198	385522
C2	9	76102.3	372229
C3	9	56335.7	356304
C4	9	56299.1	356524
C5	9	50971.3	369404
C6	9	50478.7	365217
C7	9	171991	378813
C8	9	56003.5	379639
C9	9	57246.2	370805
C10	9	57658.7	367098
C11	9	61355.9	369801
C12	9	61998.7	334468
D1	9	61750.1	382088
D2	9	64788.6	379569
D3	9	56984.6	360745
D4	9	63279	354048
D5	9	52629	373966
D6	9	51262.8	366439
D7	9	55538.6	374568
D8	9	53078.2	384916
D9	9	57201.9	380526
D10	9	97921.9	394701
D11	9	60106.9	378294
D12	9	70121.4	364806
E1	9	99118.2	381281
E2	9	64886.8	367918
E3	9	74563	353813
E4	9	64841.6	354062
E5	9	62831.4	391768
E6	9	50537.1	383034
E7	9	55547.2	390854
E8	9	55733.5	390280
E9	9	56074.5	388047
E10	9	64855.9	374372
E11	9	75487.2	391828
E12	9	83272.1	375925
F1	9	71954.1	356928
F2	9	62646.6	357488
F3	9	55073.6	360902
F4	9	80364.3	354846
F5	9	82653.7	375999
F6	9	62654.1	394421
F7	9	57976.7	383113
F8	9	70898.8	381008
F9	9	67344.7	385090
F10	9	67130.9	375100
F11	9	96452.4	393988
F12	9	91121.8	383608
G1	9	83855.7	375876
G2	9	79393	379884
G3	9	52973.2	362463
G4	9	54703.3	370475
G5	9	57450.4	400429
G6	9	60028.5	380074
G7	9	57681.4	360531
G8	9	54816.5	399940
G9	9	56209.8	402442
G10	9	60946.5	386138
G11	9	99669.5	395795
G12	9	79386	383720
H1	9	97070.1	370623
H2	9	105738	376885
H3	9	62588.6	388337
H4	9	61114.8	381416
H5	9	65952.7	418616
H6	9	64837.9	394878
H7	9
H8	9
H9	9
H10	9
H11	9
H12	9
A1	10	135195	368048
A2	10	114025	409120
A3	10	69392.4	394661
A4	10	59763.1	396788
A5	10	53950.9	407981
A6	10	67931.4	401512
A7	10	58116.2	395336
A8	10	138438	403023
A9	10	72902.1	378276
A10	10	69400.3	361753
A11	10	75012	365286
A12	10	72603.2	295903
B1	10	120337	367206
B2	10	77884.9	405300
B3	10	61355.3	361133
B4	10	54414.5	373719
B5	10	60070.9	348088
B6	10	54335.6	365513
B7	10	59738.8	387108
B8	10	61316.4	407912
B9	10	59996	376396
B10	10	55920.7	372801
B11	10	63744.7	349917
B12	10	66445.3	317844
C1	10	110260	385942
C2	10	76432.5	372391
C3	10	56684.5	355959
C4	10	56569.6	356766
C5	10	50962.3	369257
C6	10	50880.9	365265
C7	10	172599	379080
C8	10	56178	379627
C9	10	56487.1	370804
C10	10	58080.6	367015
C11	10	62536.4	370680
C12	10	61957.8	335016
D1	10	61851.7	382703
D2	10	64835.3	380193
D3	10	57139.1	360373
D4	10	63527.1	353846
D5	10	52903.2	374073
D6	10	51652.6	365410
D7	10	55307.6	373518
D8	10	53165.2	385189
D9	10	57002.7	380340
D10	10	98422.9	394496
D11	10	60360.3	378133
D12	10	70828.6	364852
E1	10	100081	381441
E2	10	65257.7	367535
E3	10	74771.5	354609
E4	10	65396.2	354177
E5	10	62952.1	391708
E6	10	50926.2	383076
E7	10	55756.7	390570
E8	10	55439.2	390313
E9	10	55961.1	388226
E10	10	63153.2	374045
E11	10	79264	391728
E12	10	83662.7	376124
F1	10	71466.8	357677
F2	10	62591.5	357968
F3	10	55161.5	360964
F4	10	86497	355035
F5	10	85230.8	376426
F6	10	62738	395540
F7	10	58150.9	382564
F8	10	72516.9	381157
F9	10	67462.1	385178
F10	10	67761.4	374662
F11	10	95873.9	393997
F12	10	91576.5	383853
G1	10	84587.9	377024
G2	10	79473.8	380612
G3	10	56703.3	363004
G4	10	55278.2	370491
G5	10	58351.4	399928
G6	10	60501.5	381252
G7	10	57757.4	360168
G8	10	54652.6	399568
G9	10	56484.8	403233
G10	10	61731.4	386477
G11	10	100395	395817
G12	10	79641.2	383575
H1	10	98142.7	371928
H2	10	105823	376765
H3	10	63341.3	389061
H4	10	61546.2	381355
H5	10	66743.9	418589
H6	10	65915.6	395576
H7	10
H8	10
H9	10
H10	10
H11	10
H12	10
A1	11	135216	369671
A2	11	115026	410658
A3	11	69855.8	395635
A4	11	59967.8	398367
A5	11	54421.4	409530
A6	11	66901.2	403178
A7	11	57924.4	396428
A8	11	116877	404076
A9	11	72320.4	379315
A10	11	69323.4	362674
A11	11	75869.9	366197
A12	11	73505.9	297434
B1	11	120536	367420
B2	11	77719.4	406290
B3	11	61558.4	362074
B4	11	55141	374996
B5	11	60081.9	349857
B6	11	54604.3	366951
B7	11	60373.5	388073
B8	11	61293.4	409365
B9	11	60238.9	377513
B10	11	56143.9	373009
B11	11	64101.6	350339
B12	11	66559.6	318911
C1	11	110343	386307
C2	11	77506	373051
C3	11	56936.7	357347
C4	11	56774.2	357426
C5	11	51604.4	370148
C6	11	50385.9	366356
C7	11	173802	380241
C8	11	56665.8	381158
C9	11	57112.3	372102
C10	11	56254.1	367853
C11	11	61457.2	370646
C12	11	62020.7	335528
D1	11	62370.5	382350
D2	11	65292.8	380415
D3	11	57417.2	360779
D4	11	64035.7	354773
D5	11	52665.8	375064
D6	11	51854.1	366542
D7	11	55597.6	374356
D8	11	53462.9	386000
D9	11	57827.3	381386
D10	11	98748.2	395584
D11	11	60492.5	378955
D12	11	71065	365634
E1	11	99919.1	381772
E2	11	65810.3	368232
E3	11	75110.9	355945
E4	11	65593.3	354786
E5	11	63294.3	391760
E6	11	51404.9	384024
E7	11	56572.6	391342
E8	11	55449	390607
E9	11	56623.2	389224
E10	11	65455.7	374415
E11	11	76712.6	392280
E12	11	86000.6	376362
F1	11	72116.3	358181
F2	11	62863.1	358585
F3	11	55609	361796
F4	11	109954	355618
F5	11	89728.4	376425
F6	11	63191.8	395618
F7	11	58697.8	383584
F8	11	74184.6	381774
F9	11	67965	385730
F10	11	67508.8	374615
F11	11	95365.8	394604
F12	11	92028.7	383946
G1	11	85702.6	377654
G2	11	80168	381215
G3	11	54162	363654
G4	11	56299.9	371134
G5	11	59660.7	400887
G6	11	62168	381859
G7	11	58574.9	360929
G8	11	56074.3	400756
G9	11	57808.6	403866
G10	11	64134.8	386435
G11	11	102807	396298
G12	11	82504.9	384385
H1	11	99859.3	371061
H2	11	106396	376660
H3	11	64903.7	389344
H4	11	63747.8	382294
H5	11	68985.9	418554
H6	11	67756.5	398056
H7	11
H8	11
H9	11
H10	11
H11	11
H12	11
A1	12	137085	370047
A2	12	115359	411126
A3	12	69490.3	396461
A4	12	60745.4	399260
A5	12	54798.5	410317
A6	12	67323.4	403706
A7	12	57625.5	396204
A8	12	80727.1	403725
A9	12	72219.8	379706
A10	12	69018.6	362964
A11	12	76440.9	365486
A12	12	73364.7	297351
B1	12	120630	368064
B2	12	78210.8	406176
B3	12	61867.4	362014
B4	12	55116.8	375280
B5	12	60019.4	350070
B6	12	54966.6	366914
B7	12	60088	388045
B8	12	61763.1	409260
B9	12	60174.8	377361
B10	12	56106.3	373098
B11	12	64029.8	350198
B12	12	66660.2	318558
C1	12	110637	385776
C2	12	78025.1	373621
C3	12	57128	357218
C4	12	57091.3	357532
C5	12	51365.2	369836
C6	12	50544.4	366240
C7	12	173196	379981
C8	12	56262.5	380999
C9	12	56876	371971
C10	12	57748	368242
C11	12	61848.4	370684
C12	12	62688.8	335345
D1	12	62352.4	382398
D2	12	65476.4	380135
D3	12	57728.5	361833
D4	12	64064.7	354576
D5	12	52884.6	374841
D6	12	51979.9	365916
D7	12	55834.8	373624
D8	12	53356.4	386104
D9	12	57584.7	381490
D10	12	99100	395590
D11	12	61006	378774
D12	12	70790.6	365444
E1	12	100017	381726
E2	12	65520.3	367860
E3	12	75533.2	355450
E4	12	65516.9	354622
E5	12	63428	391539
E6	12	51302.9	383849
E7	12	56614.8	391164
E8	12	57809.9	390801
E9	12	56624.9	389228
E10	12	63894.8	374715
E11	12	76923.5	392443
E12	12	85189.8	376797
F1	12	71904	358021
F2	12	63525.1	359242
F3	12	55485.1	361805
F4	12	93618.8	355775
F5	12	89312.7	376884
F6	12	58367.8	395241
F7	12	58838.4	383058
F8	12	69727.7	382017
F9	12	68686.2	385564
F10	12	67736.4	375155
F11	12	93458.8	394981
F12	12	91936	384663
G1	12	86672.3	378424
G2	12	81341.9	381072
G3	12	55109.6	363871
G4	12	58119.8	371071
G5	12	61319.7	400382
G6	12	64043.1	382247
G7	12	59740.4	360970
G8	12	56570.9	400372
G9	12	58708.8	403726
G10	12	67057.1	386062
G11	12	106176	395610
G12	12	85587.5	384264
H1	12	101150	371976
H2	12	108997	376757
H3	12	67238.3	389912
H4	12	67192.4	382110
H5	12	72085	418780
H6	12	70835.2	398893
H7	12
H8	12
H9	12
H10	12
H11	12
H12	12
A1	13	137877	371151
A2	13	116314	411788
A3	13	69760.1	397014
A4	13	60285.6	399947
A5	13	54521.9	410654
A6	13	66963.8	404751
A7	13	57993.9	396235
A8	13	88799.5	403966
A9	13	72498.9	379671
A10	13	70931.8	363202
A11	13	76034.9	365526
A12	13	73650.8	298038
B1	13	121733	368372
B2	13	78145.4	406747
B3	13	61909.6	362447
B4	13	54858.5	375294
B5	13	60306	350304
B6	13	54967.6	367175
B7	13	60541.9	388017
B8	13	61645	409498
B9	13	60507.9	377703
B10	13	55968.4	372582
B11	13	63790.8	350357
B12	13	66684.7	318667
C1	13	111442	386502
C2	13	76539.1	373528
C3	13	57199.7	356969
C4	13	57378.8	356870
C5	13	51427.7	369505
C6	13	50615.7	366239
C7	13	173032	379824
C8	13	56689.7	380440
C9	13	57534.4	372206
C10	13	57179.2	367633
C11	13	63140.8	370807
C12	13	62330.8	335382
D1	13	62695.5	382574
D2	13	65091.1	379923
D3	13	57619.4	361402
D4	13	63975.1	354481
D5	13	52982	374813
D6	13	51818.3	365929
D7	13	55270.3	373458
D8	13	53515.9	385977
D9	13	57922.8	380690
D10	13	99706	395892
D11	13	60812	378424
D12	13	71008.8	365498
E1	13	100550	381971
E2	13	65668.9	367659
E3	13	75733.7	355714
E4	13	65534	355030
E5	13	63099.4	391644
E6	13	51181.8	383219
E7	13	56783.7	390603
E8	13	56970.6	389672
E9	13	57150.8	388917
E10	13	63923.4	374304
E11	13	79584.7	392177
E12	13	84511.6	376677
F1	13	72201.8	358307
F2	13	63168.8	359274
F3	13	55845.9	362233
F4	13	117938	355740
F5	13	82881.8	377350
F6	13	57702	394991
F7	13	58252.1	382281
F8	13	69386.2	381547
F9	13	71585.5	385896
F10	13	67362.2	374880
F11	13	93430.1	395166
F12	13	92650.6	384435
G1	13	88709.3	378810
G2	13	83394.1	381395
G3	13	61579.3	363605
G4	13	61779.8	371035
G5	13	65766.7	400061
G6	13	67826.4	382230
G7	13	61148.3	360822
G8	13	58661.8	399938
G9	13	61094.8	403899
G10	13	72698.1	386482
G11	13	112485	395116
G12	13	89883.1	384436
H1	13	106273	371788
H2	13	111999	377330
H3	13	71409.9	390845
H4	13	71833.8	382444
H5	13	78677.7	418603
H6	13	77202.4	399461
H7	13
H8	13
H9	13
H10	13
H11	13
H12	13
A1	14	137553	371639
A2	14	116584	412988
A3	14	70001.5	397421
A4	14	60220	400526
A5	14	54720.5	410939
A6	14	68255	405104
A7	14	58485.9	396284
A8	14	141634	403424
A9	14	72404.8	379057
A10	14	69499.2	363941
A11	14	75669.7	365253
A12	14	73490.6	297776
B1	14	121677	369026
B2	14	78717.8	407099
B3	14	61655.7	362476
B4	14	54951.3	375807
B5	14	60556.8	350589
B6	14	54650.3	367252
B7	14	60381	388246
B8	14	61967.5	409007
B9	14	60629.9	377362
B10	14	55979.4	372655
B11	14	64142.4	350319
B12	14	66870.7	318814
C1	14	112028	386192
C2	14	79287.5	373036
C3	14	57367.5	357556
C4	14	56843.4	357209
C5	14	51525.9	369736
C6	14	50786.5	365643
C7	14	172708	379795
C8	14	56898.3	380681
C9	14	57430.5	372289
C10	14	56925	367670
C11	14	61593.5	370543
C12	14	62588.4	335549
D1	14	62612.7	382657
D2	14	65279.8	380206
D3	14	57815.2	361825
D4	14	64190	354133
D5	14	53308	375056
D6	14	51825.7	365632
D7	14	55705.9	373307
D8	14	53551.6	386276
D9	14	58247.9	380873
D10	14	100039	395771
D11	14	61060.1	378408
D12	14	71464.4	365306
E1	14	100358	382484
E2	14	65654.6	367662
E3	14	76071.3	356177
E4	14	65800.1	354816
E5	14	62985.4	391258
E6	14	51422.1	383171
E7	14	56351.8	391033
E8	14	55489.1	390032
E9	14	56452.2	389064
E10	14	64002.4	374489
E11	14	79326.8	391783
E12	14	85985.4	376153
F1	14	72673.4	358391
F2	14	63128.7	359662
F3	14	56240.8	361699
F4	14	82812.3	356283
F5	14	89874.5	378085
F6	14	64445.8	394551
F7	14	58929.3	382772
F8	14	69681.1	381053
F9	14	69677.9	385993
F10	14	67758.1	374911
F11	14	91492.7	395347
F12	14	92450.2	384033
G1	14	92547.9	378897
G2	14	86860.5	381551
G3	14	61265.5	364383
G4	14	68522.9	363987
G5	14	73015	399444
G6	14	75332.5	382841
G7	14	65668.8	360375
G8	14	63033.5	399850
G9	14	65441.7	403638
G10	14	83502.4	386546
G11	14	123572	395754
G12	14	102218	384688
H1	14	114193	371795
H2	14	120249	377142
H3	14	79855	390560
H4	14	83481.7	382814
H5	14	91047	418353
H6	14	88619.4	400237
H7	14
H8	14
H9	14
H10	14
H11	14
H12	14
A1	15	138269	373200
A2	15	116815	413458
A3	15	70102	399095
A4	15	60631.6	402068
A5	15	54957	412101
A6	15	67542.4	406874
A7	15	58097.6	397121
A8	15	137077	403642
A9	15	72747.5	379951
A10	15	69474.9	364676
A11	15	76632.1	365659
A12	15	73331.5	298375
B1	15	122022	368685
B2	15	79084.1	407210
B3	15	62503.4	363524
B4	15	55439.1	376107
B5	15	60981.2	351315
B6	15	55324.2	368198
B7	15	60725.6	388983
B8	15	61892.2	409108
B9	15	60864.3	378180
B10	15	56449.1	372883
B11	15	64445.7	350799
B12	15	67309.5	319277
C1	15	111666	386608
C2	15	77662.7	374447
C3	15	57359.2	357192
C4	15	57320.1	357313
C5	15	51745.6	369878
C6	15	50901.3	366837
C7	15	173186	380413
C8	15	57181.9	381897
C9	15	56933.7	373282
C10	15	57015.7	368130
C11	15	62154.4	371571
C12	15	62683.6	336214
D1	15	62914.2	383475
D2	15	66146.5	380538
D3	15	58409	362135
D4	15	64277.8	354715
D5	15	53424.6	374312
D6	15	51880.9	366045
D7	15	56068.1	373681
D8	15	53381.1	386776
D9	15	58137.6	381664
D10	15	100688	396153
D11	15	61393.3	378548
D12	15	71792.6	365380
E1	15	100726	382307
E2	15	66020	367874
E3	15	76200.5	356412
E4	15	65898.3	354856
E5	15	63137	391082
E6	15	51508.5	384004
E7	15	56742.3	391192
E8	15	57537.7	390355
E9	15	56820.3	389721
E10	15	64620.9	374688
E11	15	77999.5	392460
E12	15	85164.1	376390
F1	15	72027.9	358612
F2	15	63890.8	360101
F3	15	56202.7	362123
F4	15	80653.8	356092
F5	15	82837.2	378798
F6	15	64237.8	395011
F7	15	58965.5	383181
F8	15	68421.6	382609
F9	15	71097.8	386491
F10	15	67952.3	375108
F11	15	92241.7	395468
F12	15	91529.1	385168
G1	15	99270.6	378912
G2	15	93483.3	381817
G3	15	70225.1	364176
G4	15	81686.1	364991
G5	15	87268.3	400721
G6	15	89071.3	383346
G7	15	72682.5	361033
G8	15	71206	400423
G9	15	73856.6	403966
G10	15	102982	386703
G11	15	143529	395385
G12	15	121046	384771
H1	15	128272	371040
H2	15	133534	377420
H3	15	94919.3	390939
H4	15	102722	382619
H5	15	111711	418511
H6	15	109196	400316
H7	15
H8	15
H9	15
H10	15
H11	15
H12	15
A1	16	138987	373894
A2	16	117615	414669
A3	16	70866.4	399268
A4	16	60601.9	402544
A5	16	55097.8	413205
A6	16	71815.4	407456
A7	16	59689.9	397232
A8	16	81590.5	404101
A9	16	78205.4	380590
A10	16	70822.5	365317
A11	16	76324.4	366002
A12	16	74047.6	298122
B1	16	122679	369599
B2	16	79188.8	407955
B3	16	62499.1	363316
B4	16	55730	376822
B5	16	61281.7	352127
B6	16	55231.9	368386
B7	16	60915.8	389306
B8	16	62094.4	409728
B9	16	61260.7	378527
B10	16	56277	372815
B11	16	64585.8	350643
B12	16	67904.1	319704
C1	16	112252	386145
C2	16	80263.9	374773
C3	16	58058.1	357620
C4	16	56757.4	357767
C5	16	51751.2	370466
C6	16	50855.7	367098
C7	16	173236	380571
C8	16	57317	381628
C9	16	57730.1	373844
C10	16	58129.7	368168
C11	16	63147.7	371355
C12	16	62649.2	336850
D1	16	63955.1	383059
D2	16	66812.3	380264
D3	16	59434.4	362434
D4	16	64000.5	354791
D5	16	53005.2	374898
D6	16	52182.9	365963
D7	16	56328.1	373702
D8	16	54014.7	386998
D9	16	58207.1	381771
D10	16	100710	396262
D11	16	61651.3	378743
D12	16	71937	365729
E1	16	101255	381947
E2	16	66338.3	367578
E3	16	76782	356605
E4	16	65670	354689
E5	16	63150.8	391785
E6	16	51497.1	384352
E7	16	56552.1	391173
E8	16	56702.2	390765
E9	16	57410.1	390056
E10	16	64210.6	374913
E11	16	77891	391990
E12	16	85996.8	376588
F1	16	72757.3	358915
F2	16	63664.9	360400
F3	16	56564	362032
F4	16	91902.3	356484
F5	16	86075.3	379074
F6	16	60775.7	395283
F7	16	59612.6	382557
F8	16	70665.4	382601
F9	16	71073.5	386077
F10	16	68679	374723
F11	16	91472.9	395758
F12	16	91220.4	384908
G1	16	111715	378933
G2	16	105999	381859
G3	16	80779.2	365195
G4	16	104732	365219
G5	16	112102	400128
G6	16	112533	382986
G7	16	86863.8	360868
G8	16	85927.8	400025
G9	16	89509.7	404303
G10	16	135860	386824
G11	16	177175	395287
G12	16	153836	385263
H1	16	151773	371441
H2	16	158937	377262
H3	16	120674	390981
H4	16	135399	382851
H5	16	147851	418092
H6	16	143780	401147
H7	16
H8	16
H9	16
H10	16
H11	16
H12	16
A1	17	139702	373749
A2	17	117966	415001
A3	17	70504.9	399475
A4	17	60765.5	403419
A5	17	55176.7	413348
A6	17	67452.7	407819
A7	17	58300.2	397162
A8	17	82198.5	404182
A9	17	69585	380542
A10	17	70026.4	364968
A11	17	76499.1	365682
A12	17	74052.2	298876
B1	17	123142	369368
B2	17	79985	407371
B3	17	62634.5	363431
B4	17	55410.9	376470
B5	17	61036	351868
B6	17	55216.6	368641
B7	17	60919.7	389018
B8	17	62547.1	409554
B9	17	61507.6	378488
B10	17	55966.3	373289
B11	17	64442.1	350916
B12	17	67695.7	319900
C1	17	112316	386360
C2	17	78366.2	374314
C3	17	57973.9	357850
C4	17	57333.6	357517
C5	17	51864.1	369753
C6	17	50829.4	366853
C7	17	173359	380673
C8	17	57321	382073
C9	17	57745.4	374145
C10	17	57351.7	368496
C11	17	61557.3	371620
C12	17	63080.6	336785
D1	17	64342.6	383088
D2	17	67000.6	380848
D3	17	59268.2	362082
D4	17	64129.5	353938
D5	17	53403.5	375212
D6	17	52220.6	365914
D7	17	56368.4	373596
D8	17	54095.2	386764
D9	17	58132.6	382087
D10	17	101076	396711
D11	17	61712.1	379216
D12	17	71862.4	365722
E1	17	101874	382241
E2	17	66830.9	367812
E3	17	77374.2	356341
E4	17	65773.3	354303
E5	17	63093.5	392069
E6	17	51598.5	384462
E7	17	57026.8	391374
E8	17	56343.9	390718
E9	17	57385.1	390117
E10	17	64712.4	374992
E11	17	77469	391976
E12	17	85676.6	377007
F1	17	74147.4	358310
F2	17	64661	359902
F3	17	57512.5	361968
F4	17	86528.1	356416
F5	17	86237.4	379898
F6	17	58480.9	395184
F7	17	59866.9	382925
F8	17	70888.2	382623
F9	17	73163	385986
F10	17	68263.5	374778
F11	17	90982.6	395985
F12	17	91082.2	385132
G1	17	134208	379372
G2	17	128758	381784
G3	17	107027	364727
G4	17	141232	365848
G5	17	151975	400260
G6	17	150414	382639
G7	17	110335	360470
G8	17	111860	399985
G9	17	115961	404396
G10	17	183888	386920
G11	17	225247	395232
G12	17	201773	385049
H1	17	188998	370470
H2	17	198540	377333
H3	17	162098	391417
H4	17	183618	382978
H5	17	200057	418069
H6	17	194417	401366
H7	17
H8	17
H9	17
H10	17
H11	17
H12	17
A1	18	139910	374451
A2	18	118759	414467
A3	18	71225.6	399276
A4	18	60914.8	402867
A5	18	55088.2	413380
A6	18	67739.3	408120
A7	18	58616.5	396703
A8	18	90085.8	404031
A9	18	71399.5	380626
A10	18	69959.4	365222
A11	18	76447	365641
A12	18	73925	298600
B1	18	123922	369524
B2	18	81304	407711
B3	18	63723.9	363750
B4	18	55614.3	376429
B5	18	60937	351366
B6	18	55318.3	368530
B7	18	61140.4	388968
B8	18	62936.8	409102
B9	18	61825.1	378613
B10	18	56241.8	372608
B11	18	64697.1	350495
B12	18	67852.9	319906
C1	18	113479	386255
C2	18	82372.5	374206
C3	18	58702.9	357603
C4	18	56804	357277
C5	18	51910.8	369625
C6	18	50671.2	366809
C7	18	173242	380476
C8	18	57255.9	381396
C9	18	57748.5	374192
C10	18	57514.8	367722
C11	18	62629.8	371562
C12	18	62763.3	336194
D1	18	65346.1	382344
D2	18	68650.6	380071
D3	18	60710.6	362533
D4	18	64410.2	354606
D5	18	53208.7	375009
D6	18	51954.7	365974
D7	18	56733	373453
D8	18	54573.3	386734
D9	18	58796.3	382107
D10	18	101203	396275
D11	18	61428.9	378469
D12	18	71820.3	364928
E1	18	101994	382129
E2	18	67686.7	366946
E3	18	78157.6	356474
E4	18	65883.7	354524
E5	18	63385.3	391149
E6	18	51712.7	383948
E7	18	56825.8	390465
E8	18	56599.7	390603
E9	18	57577.8	389860
E10	18	64842.1	374569
E11	18	78028.5	392054
E12	18	85921.1	375994
F1	18	74537.6	358673
F2	18	66126.5	360308
F3	18	58248.9	361884
F4	18	83853.3	355930
F5	18	88949.8	380332
F6	18	57495.4	394855
F7	18	60087.9	381980
F8	18	72539.8	382416
F9	18	71562.1	386470
F10	18	68524.3	374030
F11	18	90568.5	396409
F12	18	91012.4	385447
G1	18	171208	378700
G2	18	165176	382095
G3	18	140802	364939
G4	18	190594	365185
G5	18	206127	399234
G6	18	202420	383339
G7	18	147981	359783
G8	18	153751	399766
G9	18	157932	404785
G10	18	242835	387053
G11	18	286068	395787
G12	18	261323	384578
H1	18	242650	371084
H2	18	252243	377485
H3	18	217373	392056
H4	18	241815	383162
H5	18	264092	418178
H6	18	256078	401672
H7	18
H8	18
H9	18
H10	18
H11	18
H12	18
A1	19	139692	374181
A2	19	119424	414671
A3	19	72806.8	399628
A4	19	60608.9	403518
A5	19	55278.8	413991
A6	19	70141.4	409011
A7	19	59000.9	396736
A8	19	119079	403377
A9	19	69666.9	380170
A10	19	70604.3	365465
A11	19	76780.1	365433
A12	19	73905.3	298489
B1	19	125698	369496
B2	19	82753	407916
B3	19	65506.1	364239
B4	19	55657.6	376978
B5	19	61204.9	352114
B6	19	55522.4	368905
B7	19	62236	389001
B8	19	63503.8	409907
B9	19	62489.5	378730
B10	19	56784.1	372418
B11	19	64963	350539
B12	19	68176.4	319783
C1	19	114508	386270
C2	19	79972.7	374055
C3	19	59194.5	357827
C4	19	57162.4	357668
C5	19	51888.3	369663
C6	19	50933.5	366950
C7	19	173672	380862
C8	19	57998.8	381708
C9	19	58586.9	374710
C10	19	57008	368187
C11	19	62321.9	371665
C12	19	62874.4	336487
D1	19	68208.5	382516
D2	19	70448.5	380466
D3	19	63229.2	361725
D4	19	64554.6	354695
D5	19	53571.4	374458
D6	19	52327.1	366034
D7	19	57886.1	373524
D8	19	55714.8	386887
D9	19	59746.1	381893
D10	19	101800	396571
D11	19	61912.4	379002
D12	19	72455.3	364766
E1	19	104165	381960
E2	19	69420.9	367052
E3	19	80260	356691
E4	19	66231.6	354503
E5	19	63248.4	391116
E6	19	51674.5	384563
E7	19	57774.6	389906
E8	19	57426.9	390397
E9	19	58320.3	389945
E10	19	65182.1	375255
E11	19	77941.1	391962
E12	19	86388.5	376756
F1	19	76434.3	359125
F2	19	67991	360183
F3	19	60871.1	361638
F4	19	79227.6	355961
F5	19	91128.9	380775
F6	19	58107.9	394957
F7	19	61278.8	382102
F8	19	69574	382367
F9	19	71187.3	386548
F10	19	69000.9	374772
F11	19	90208.6	396768
F12	19	91572.7	385160
G1	19	222468	379486
G2	19	216200	382114
G3	19	190166	364907
G4	19	247474	366033
G5	19	267218	399642
G6	19	260546	383534
G7	19	198449	360338
G8	19	209663	399831
G9	19	216152	404744
G10	19	301878	386795
G11	19	344995	395009
G12	19	320131	384646
H1	19	299611	371175
H2	19	311544	377570
H3	19	278185	392149
H4	19	299910	383088
H5	19	327870	418753
H6	19	316943	401815
H7	19
H8	19
H9	19
H10	19
H11	19
H12	19
A1	20	142462	375242
A2	20	120939	415705
A3	20	73893.4	400692
A4	20	61309.1	404476
A5	20	55359.3	414858
A6	20	68073.7	409592
A7	20	60748.9	397355
A8	20	105152	404039
A9	20	71466.6	378716
A10	20	70794.1	366533
A11	20	77187.6	367012
A12	20	74569.8	299528
B1	20	128913	370111
B2	20	86798.8	408415
B3	20	68979.5	364444
B4	20	56179.8	376762
B5	20	61406.3	353230
B6	20	55670	369863
B7	20	63530.6	389872
B8	20	65493.6	410243
B9	20	63959.5	379870
B10	20	56887.5	373323
B11	20	65526.7	351516
B12	20	68328.4	320482
C1	20	116155	386643
C2	20	83038.3	374133
C3	20	61434.8	357904
C4	20	57431.2	358174
C5	20	52041.8	370721
C6	20	51140.6	367951
C7	20	174579	381681
C8	20	59101.2	382050
C9	20	59902.9	375579
C10	20	57717.4	368877
C11	20	63128.3	372715
C12	20	63393.5	337752
D1	20	73756.5	382952
D2	20	75794.2	380920
D3	20	68121.9	362506
D4	20	64596.4	354480
D5	20	53729.9	375378
D6	20	52443	366075
D7	20	59399.4	374025
D8	20	57430.8	387920
D9	20	61337.1	382887
D10	20	102020	397424
D11	20	62556.7	379849
D12	20	73214.4	365719
E1	20	106872	382333
E2	20	72952.2	367186
E3	20	83303.4	356746
E4	20	66083.2	354631
E5	20	63677.1	391355
E6	20	51955.5	384887
E7	20	58703.9	391013
E8	20	58612.6	391081
E9	20	59745.4	390529
E10	20	65192	375723
E11	20	78994.1	392486
E12	20	86104.1	377261
F1	20	80762.1	359181
F2	20	72372.4	360518
F3	20	65056.8	361948
F4	20	81208.3	356135
F5	20	88311.8	381133
F6	20	58603.6	395080
F7	20	63258.6	382958
F8	20	71933.5	382758
F9	20	73960.8	387170
F10	20	69420.1	375270
F11	20	90509.1	396502
F12	20	92531.4	385843
G1	20	281228	378924
G2	20	274588	381504
G3	20	247401	365178
G4	20	298207	366811
G5	20	322186	400561
G6	20	313478	384500
G7	20	254045	360785
G8	20	270086	400345
G9	20	278271	405296
G10	20	349046	387524
G11	20	393028	395404
G12	20	367662	385214
H1	20	350777	370624
H2	20	363896	377193
H3	20	333916	392261
H4	20	347286	383909
H5	20	379286	418973
H6	20	367112	402403
H7	20
H8	20
H9	20
H10	20
H11	20
H12	20
A1	21	145257	375089
A2	21	123749	415719
A3	21	76482.8	400682
A4	21	60929.8	404120
A5	21	55480.5	414737
A6	21	68193.1	410087
A7	21	63565.2	396883
A8	21	89952.2	404421
A9	21	75680.3	380941
A10	21	70696.7	366397
A11	21	76763.1	366542
A12	21	74165.6	299383
B1	21	134966	369718
B2	21	93561.8	408025
B3	21	74801	365029
B4	21	55969.6	376632
B5	21	61658.7	352949
B6	21	56238.4	369475
B7	21	65809	389494
B8	21	67664.5	410235
B9	21	66481.4	379133
B10	21	57075.8	373041
B11	21	65556.3	351390
B12	21	68874.2	320465
C1	21	120511	386384
C2	21	85413.6	374964
C3	21	65878.2	358011
C4	21	57491.1	357985
C5	21	52135.3	370074
C6	21	51395.2	367247
C7	21	175657	381270
C8	21	60633.4	381961
C9	21	61307.6	375311
C10	21	57779.3	368447
C11	21	63016.2	372324
C12	21	63213.7	337249
D1	21	83116.2	382961
D2	21	85669.6	380084
D3	21	77460.8	362735
D4	21	64474.2	354785
D5	21	53646.4	375070
D6	21	52386.9	366501
D7	21	62302.4	373551
D8	21	60287.5	387398
D9	21	64279.2	382518
D10	21	102375	397276
D11	21	63414	379361
D12	21	74021.6	365387
E1	21	113934	382387
E2	21	79651.7	367117
E3	21	90020.7	356886
E4	21	66547.9	354690
E5	21	63664	391203
E6	21	51933.9	384142
E7	21	60757.8	390831
E8	21	60834.6	391005
E9	21	61534.6	390189
E10	21	65876.6	375583
E11	21	84609.7	392271
E12	21	87123.4	376852
F1	21	88581.1	358995
F2	21	79914.2	359987
F3	21	72961.7	361909
F4	21	93265.6	356638
F5	21	83470.9	381532
F6	21	63086.6	394746
F7	21	67004.3	382737
F8	21	78564.2	382529
F9	21	80042.3	386654
F10	21	70341.2	375122
F11	21	92744.5	396757
F12	21	94749.4	386283
G1	21	336642	379540
[truncated: 11,351 more rows]

## Sheet: Amplification Data
Block Type	96alum
Chemistry	SYBR_GREEN
Experiment File Name	C:\Users\Administrator\Desktop\20211108-GAT.eds
Experiment Run End Time	Not Started
Instrument Type	sds7500
Passive Reference	ROX
Well	Cycle	Target Name	Rn	ΔRn
A1	1	VEGFA	0.363961	0.00612197
A1	2	VEGFA	0.365417	0.00651636
A1	3	VEGFA	0.363158	0.0031967
A1	4	VEGFA	0.360781	-0.000241576
A1	5	VEGFA	0.362825	0.000741114
A1	6	VEGFA	0.362601	-0.000544659
A1	7	VEGFA	0.363067	-0.00113985
A1	8	VEGFA	0.366239	0.000970915
A1	9	VEGFA	0.36702	0.00069094
A1	10	VEGFA	0.36733	-6.03877e-05
A1	11	VEGFA	0.365773	-0.00267931
A1	12	VEGFA	0.370453	0.000939487
A1	13	VEGFA	0.371486	0.00091164
A1	14	VEGFA	0.370124	-0.00151175
A1	15	VEGFA	0.370496	-0.00220064
A1	16	VEGFA	0.371728	-0.00203036
A1	17	VEGFA	0.373787	-0.00103235
A1	18	VEGFA	0.373641	-0.00223972
A1	19	VEGFA	0.373326	-0.00361648
A1	20	VEGFA	0.379655	0.00165122
A1	21	VEGFA	0.38726	0.00819506
A1	22	VEGFA	0.397245	0.0171195
A1	23	VEGFA	0.418073	0.0368858
A1	24	VEGFA	0.458872	0.0766237
A1	25	VEGFA	0.529671	0.146362
A1	26	VEGFA	0.636494	0.252123
A1	27	VEGFA	0.772998	0.387566
A1	28	VEGFA	0.915926	0.529433
A1	29	VEGFA	1.0445	0.656948
A1	30	VEGFA	1.14158	0.752967
A1	31	VEGFA	1.2114	0.821728
A1	32	VEGFA	1.26585	0.875107
A1	33	VEGFA	1.30065	0.908846
A1	34	VEGFA	1.33249	0.939625
A1	35	VEGFA	1.35558	0.961653
A1	36	VEGFA	1.3734	0.97842
A1	37	VEGFA	1.38695	0.990909
A1	38	VEGFA	1.39653	0.999426
A1	39	VEGFA	1.40691	1.00874
A1	40	VEGFA	1.41393	1.0147
A1	41	VEGFA	1.42189	1.0216
A1	42	VEGFA	1.42451	1.02316
A1	43	VEGFA	1.42635	1.02394
A1	44	VEGFA	1.43296	1.02949
A1	45	VEGFA	1.431	1.02646
A2	1	VEGFA	0.278411	0.0075452
A2	2	VEGFA	0.274403	0.00261626
A2	3	VEGFA	0.274854	0.00214559
A2	4	VEGFA	0.272986	-0.000643573
A2	5	VEGFA	0.274773	0.000222158
A2	6	VEGFA	0.274288	-0.00118358
A2	7	VEGFA	0.275567	-0.00082652
A2	8	VEGFA	0.277907	0.000592252
A2	9	VEGFA	0.279287	0.00105169
A2	10	VEGFA	0.278708	-0.000449064
A2	11	VEGFA	0.280103	2.47658e-05
A2	12	VEGFA	0.280593	-0.000406322
A2	13	VEGFA	0.282461	0.000540412
A2	14	VEGFA	0.282293	-0.000548264
A2	15	VEGFA	0.282531	-0.00123184
A2	16	VEGFA	0.283635	-0.00104918
A2	17	VEGFA	0.284254	-0.0013514
A2	18	VEGFA	0.286534	7.65124e-06
A2	19	VEGFA	0.287996	0.000548865
A2	20	VEGFA	0.290925	0.00255635
A2	21	VEGFA	0.297674	0.00838402
A2	22	VEGFA	0.308306	0.0180954
A2	23	VEGFA	0.331288	0.0401557
A2	24	VEGFA	0.374666	0.0826129
A2	25	VEGFA	0.443433	0.150459
A2	26	VEGFA	0.551998	0.258103
A2	27	VEGFA	0.692338	0.397521
A2	28	VEGFA	0.839623	0.543885
A2	29	VEGFA	0.964258	0.667599
A2	30	VEGFA	1.06283	0.765247
A2	31	VEGFA	1.12954	0.831041
A2	32	VEGFA	1.18325	0.883828
A2	33	VEGFA	1.22045	0.920108
A2	34	VEGFA	1.24772	0.946455
A2	35	VEGFA	1.2715	0.969316
A2	36	VEGFA	1.28986	0.986749
A2	37	VEGFA	1.30099	0.996959
A2	38	VEGFA	1.31298	1.00803
A2	39	VEGFA	1.32306	1.01719
A2	40	VEGFA	1.32893	1.02214
A2	41	VEGFA	1.33451	1.0268
A2	42	VEGFA	1.33634	1.0277
A2	43	VEGFA	1.33814	1.02858
A2	44	VEGFA	1.34236	1.03189
A2	45	VEGFA	1.34478	1.03338
A3	1	VEGFA	0.182189	0.00816482
A3	2	VEGFA	0.179378	0.00507273
A3	3	VEGFA	0.17797	0.00338445
A3	4	VEGFA	0.17635	0.00148376
A3	5	VEGFA	0.175913	0.000765838
A3	6	VEGFA	0.174468	-0.000959629
A3	7	VEGFA	0.17553	-0.000178601
A3	8	VEGFA	0.175153	-0.000836624
A3	9	VEGFA	0.175956	-0.000313833
A3	10	VEGFA	0.175828	-0.000722738
A3	11	VEGFA	0.176566	-0.000265051
A3	12	VEGFA	0.175277	-0.00183529
A3	13	VEGFA	0.175712	-0.00168059
A3	14	VEGFA	0.176139	-0.00153388
A3	15	VEGFA	0.175652	-0.00230136
A3	16	VEGFA	0.177491	-0.000743448
A3	17	VEGFA	0.176494	-0.00202143
A3	18	VEGFA	0.178387	-0.000408876
A3	19	VEGFA	0.182186	0.00310999
A3	20	VEGFA	0.184414	0.00505731
A3	21	VEGFA	0.190882	0.0112438
A3	22	VEGFA	0.203299	0.0233802
A3	23	VEGFA	0.229613	0.0494138
A3	24	VEGFA	0.273346	0.0928661
A3	25	VEGFA	0.348018	0.167257
A3	26	VEGFA	0.463864	0.282823
A3	27	VEGFA	0.607828	0.426506
A3	28	VEGFA	0.757559	0.575957
A3	29	VEGFA	0.884022	0.702139
A3	30	VEGFA	0.979342	0.797178
A3	31	VEGFA	1.05227	0.869825
A3	32	VEGFA	1.10376	0.921032
A3	33	VEGFA	1.14093	0.957921
A3	34	VEGFA	1.16806	0.984773
A3	35	VEGFA	1.1926	1.00904
A3	36	VEGFA	1.20872	1.02487
A3	37	VEGFA	1.22327	1.03914
A3	38	VEGFA	1.23223	1.04782
A3	39	VEGFA	1.2421	1.05741
A3	40	VEGFA	1.25042	1.06545
A3	41	VEGFA	1.25628	1.07103
A3	42	VEGFA	1.25841	1.07288
A3	43	VEGFA	1.2608	1.07499
A3	44	VEGFA	1.2628	1.07671
A3	45	VEGFA	1.26482	1.07845
A4	1	LI-6	0.15657	0.00682075
A4	2	LI-6	0.152876	0.00299125
A4	3	LI-6	0.152439	0.00241887
A4	4	LI-6	0.150719	0.000563438
A4	5	LI-6	0.151033	0.000741615
A4	6	LI-6	0.1509	0.000472773
A4	7	LI-6	0.151392	0.000830002
A4	8	LI-6	0.15093	0.00023256
A4	9	LI-6	0.150319	-0.000514178
A4	10	LI-6	0.150617	-0.000351557
A4	11	LI-6	0.150534	-0.000570138
A4	12	LI-6	0.152145	0.000905126
A4	13	LI-6	0.150734	-0.000641283
A4	14	LI-6	0.150352	-0.00115877
A4	15	LI-6	0.1508	-0.000847089
A4	16	LI-6	0.150547	-0.00123489
A4	17	LI-6	0.150626	-0.0012914
A4	18	LI-6	0.151203	-0.000850012
A4	19	LI-6	0.150201	-0.00198725
A4	20	LI-6	0.151577	-0.000747484
A4	21	LI-6	0.150771	-0.00168838
A4	22	LI-6	0.151316	-0.00127918
A4	23	LI-6	0.151703	-0.00102833
A4	24	LI-6	0.152805	-6.18642e-05
A4	25	LI-6	0.153348	0.000345717
A4	26	LI-6	0.155259	0.00212166
A4	27	LI-6	0.158893	0.00562005
A4	28	LI-6	0.166883	0.0134747
A4	29	LI-6	0.17934	0.0257955
A4	30	LI-6	0.207296	0.0536161
A4	31	LI-6	0.256437	0.102622
A4	32	LI-6	0.342376	0.188425
A4	33	LI-6	0.472561	0.318474
A4	34	LI-6	0.64387	0.489649
A4	35	LI-6	0.821154	0.666797
A4	36	LI-6	0.953061	0.798568
A4	37	LI-6	1.03578	0.88115
A4	38	LI-6	1.08841	0.933641
A4	39	LI-6	1.12663	0.971734
A4	40	LI-6	1.15922	1.00419
A4	41	LI-6	1.18491	1.02974
A4	42	LI-6	1.2033	1.04799
A4	43	LI-6	1.21898	1.06354
A4	44	LI-6	1.23127	1.0757
A4	45	LI-6	1.24586	1.09015
A5	1	LI-6	0.135769	0.00528462
A5	2	LI-6	0.132967	0.00223597
A5	3	LI-6	0.132699	0.00172212
A5	4	LI-6	0.131672	0.000449339
A5	5	LI-6	0.132682	0.00121298
A5	6	LI-6	0.131888	0.000172684
A5	7	LI-6	0.133008	0.00104652
A5	8	LI-6	0.13213	-7.74918e-05
A5	9	LI-6	0.132705	0.000251511
A5	10	LI-6	0.132239	-0.000460631
A5	11	LI-6	0.132888	-5.79565e-05
A5	12	LI-6	0.133552	0.000359961
A5	13	LI-6	0.132769	-0.000669068
A5	14	LI-6	0.13316	-0.000523975
A5	15	LI-6	0.133358	-0.000571808
A5	16	LI-6	0.133342	-0.000833547
A5	17	LI-6	0.133487	-0.00093486
A5	18	LI-6	0.133263	-0.00140514
A5	19	LI-6	0.133527	-0.00138772
A5	20	LI-6	0.133442	-0.00171868
A5	21	LI-6	0.133773	-0.00163378
A5	22	LI-6	0.133329	-0.00232311
A5	23	LI-6	0.134651	-0.0012479
A5	24	LI-6	0.135862	-0.000283203
A5	25	LI-6	0.136241	-0.000149435
A5	26	LI-6	0.138928	0.00229088
A5	27	LI-6	0.143655	0.00677232
A5	28	LI-6	0.151749	0.0146196
A5	29	LI-6	0.167122	0.0297472
A5	30	LI-6	0.19723	0.0596091
A5	31	LI-6	0.251373	0.113506
A5	32	LI-6	0.346833	0.20872
A5	33	LI-6	0.48596	0.347601
A5	34	LI-6	0.659363	0.520758
A5	35	LI-6	0.831929	0.693077
A5	36	LI-6	0.953054	0.813957
A5	37	LI-6	1.02962	0.890279
A5	38	LI-6	1.07824	0.938655
A5	39	LI-6	1.11792	0.978085
A5	40	LI-6	1.14884	1.00876
A5	41	LI-6	1.17023	1.0299
A5	42	LI-6	1.18763	1.04706
A5	43	LI-6	1.20358	1.06276
A5	44	LI-6	1.21846	1.07739
A5	45	LI-6	1.23072	1.08941
A6	1	LI-6	0.168182	0.00416706
A6	2	LI-6	0.164657	0.00038708
A6	3	LI-6	0.16362	-0.0009063
A6	4	LI-6	0.162891	-0.00189106
A6	5	LI-6	0.164166	-0.000871094
A6	6	LI-6	0.163366	-0.00192713
A6	7	LI-6	0.164261	-0.00128762
A6	8	LI-6	0.174328	0.00852403
A6	9	LI-6	0.163933	-0.00212686
A6	10	LI-6	0.169189	0.00287307
A6	11	LI-6	0.165934	-0.000636971
A6	12	LI-6	0.166763	-6.36226e-05
A6	13	LI-6	0.165445	-0.00163825
A6	14	LI-6	0.168488	0.00114933
A6	15	LI-6	0.166003	-0.0015909
A6	16	LI-6	0.176253	0.00840359
A6	17	LI-6	0.165399	-0.00270682
A6	18	LI-6	0.165979	-0.00238253
A6	19	LI-6	0.17149	0.00287367
A6	20	LI-6	0.166199	-0.00267363
A6	21	LI-6	0.16629	-0.0028386
A6	22	LI-6	0.169801	0.000416789
A6	23	LI-6	0.167031	-0.00260845
A6	24	LI-6	0.168539	-0.00135629
A6	25	LI-6	0.169269	-0.000881454
A6	26	LI-6	0.169764	-0.000642115
A6	27	LI-6	0.175451	0.00478921
A6	28	LI-6	0.181337	0.010419
A6	29	LI-6	0.194938	0.0237649
A6	30	LI-6	0.221318	0.0498889
A6	31	LI-6	0.267697	0.0960123
A6	32	LI-6	0.350222	0.178281
A6	33	LI-6	0.478448	0.306252
A6	34	LI-6	0.647417	0.474965
A6	35	LI-6	0.823973	0.651266
A6	36	LI-6	0.960901	0.787938
A6	37	LI-6	1.04211	0.86889
A6	38	LI-6	1.09668	0.923202
A6	39	LI-6	1.13454	0.960809
A6	40	LI-6	1.16648	0.992498
A6	41	LI-6	1.18768	1.01344
A6	42	LI-6	1.2061	1.0316
A6	43	LI-6	1.22516	1.05041
A6	44	LI-6	1.23847	1.06346
A6	45	LI-6	1.24947	1.07421
A7	1	MAPK3	0.156015	0.0132181
A7	2	MAPK3	0.142428	-0.000804546
A7	3	MAPK3	0.146562	0.00289435
A7	4	MAPK3	0.146582	0.00247863
A7	5	MAPK3	0.144275	-0.00026393
A7	6	MAPK3	0.146494	0.00151979
A7	7	MAPK3	0.144982	-0.000427718
A7	8	MAPK3	0.144125	-0.00171964
A7	9	MAPK3	0.145737	-0.000542943
A7	10	MAPK3	0.147005	0.000288731
A7	11	MAPK3	0.146116	-0.00103517
A7	12	MAPK3	0.145444	-0.0021423
A7	13	MAPK3	0.146362	-0.00165961
A7	14	MAPK3	0.147586	-0.000871253
A7	15	MAPK3	0.146297	-0.00259558
A7	16	MAPK3	0.150265	0.000936695
A7	17	MAPK3	0.146792	-0.00297153
A7	18	MAPK3	0.147759	-0.00243972
A7	19	MAPK3	0.148716	-0.00191841
A7	20	MAPK3	0.152883	0.00181364
A7	21	MAPK3	0.160161	0.00865595
A7	22	MAPK3	0.165385	0.0134445
A7	23	MAPK3	0.184824	0.0324477
A7	24	MAPK3	0.214745	0.0619335
A7	25	MAPK3	0.26847	0.115224
A7	26	MAPK3	0.358129	0.204447
A7	27	MAPK3	0.478652	0.324534
A7	28	MAPK3	0.616353	0.4618
A7	29	MAPK3	0.746779	0.591791
A7	30	MAPK3	0.857395	0.701971
A7	31	MAPK3	0.944893	0.789035
A7	32	MAPK3	1.00829	0.852
A7	33	MAPK3	1.05014	0.893409
A7	34	MAPK3	1.08441	0.927249
A7	35	MAPK3	1.11342	0.955817
A7	36	MAPK3	1.13296	0.974929
A7	37	MAPK3	1.14723	0.98876
A7	38	MAPK3	1.15635	0.997447
A7	39	MAPK3	1.17065	1.01131
A7	40	MAPK3	1.17823	1.01846
A7	41	MAPK3	1.18388	1.02366
A7	42	MAPK3	1.18913	1.02848
A7	43	MAPK3	1.1939	1.03282
A7	44	MAPK3	1.2011	1.03958
A7	45	MAPK3	1.20403	1.04207
A8	1
A8	2
A8	3
A8	4
A8	5
A8	6
A8	7
A8	8
A8	9
A8	10
A8	11
A8	12
A8	13
A8	14
A8	15
A8	16
A8	17
A8	18
A8	19
A8	20
A8	21
A8	22
A8	23
A8	24
A8	25
A8	26
A8	27
A8	28
A8	29
A8	30
A8	31
A8	32
A8	33
A8	34
A8	35
A8	36
A8	37
A8	38
A8	39
A8	40
A8	41
A8	42
A8	43
A8	44
A8	45
A9	1	MAPK3	0.189388	-0.00319583
A9	2	MAPK3	0.193034	0.000536965
A9	3	MAPK3	0.187426	-0.00498354
A9	4	MAPK3	0.196238	0.00391497
A9	5	MAPK3	0.188914	-0.0033213
A9	6	MAPK3	0.194284	0.00213593
A9	7	MAPK3	0.192756	0.000694905
A9	8	MAPK3	0.191263	-0.000711162
A9	9	MAPK3	0.196453	0.00456538
A9	10	MAPK3	0.192722	0.000921765
A9	11	MAPK3	0.190661	-0.00105274
A9	12	MAPK3	0.190199	-0.00142703
A9	13	MAPK3	0.190952	-0.000587271
A9	14	MAPK3	0.191013	-0.000439519
A9	15	MAPK3	0.191466	0.00010046
A9	16	MAPK3	0.205485	0.0142066
A9	17	MAPK3	0.182858	-0.00833355
A9	18	MAPK3	0.187584	-0.00351982
A9	19	MAPK3	0.183252	-0.00776529
A9	20	MAPK3	0.188708	-0.00222246
A9	21	MAPK3	0.198667	0.00782368
A9	22	MAPK3	0.202386	0.0116304
A9	23	MAPK3	0.221799	0.0311296
A9	24	MAPK3	0.254567	0.0639847
A9	25	MAPK3	0.314661	0.124166
A9	26	MAPK3	0.408113	0.217705
A9	27	MAPK3	0.536592	0.346271
A9	28	MAPK3	0.67538	0.485146
A9	29	MAPK3	0.806031	0.615885
A9	30	MAPK3	0.909924	0.719864
A9	31	MAPK3	0.988712	0.798739
A9	32	MAPK3	1.04483	0.854942
A9	33	MAPK3	1.08315	0.893348
A9	34	MAPK3	1.11276	0.923053
A9	35	MAPK3	1.1395	0.949873
A9	36	MAPK3	1.15703	0.967495
A9	37	MAPK3	1.17049	0.981042
A9	38	MAPK3	1.18218	0.992817
A9	39	MAPK3	1.19496	1.00568
A9	40	MAPK3	1.20512	1.01593
A9	41	MAPK3	1.20764	1.01854
A9	42	MAPK3	1.21477	1.02575
A9	43	MAPK3	1.22083	1.03191
A9	44	MAPK3	1.22585	1.03701
A9	45	MAPK3	1.23128	1.04252
A10	1	JUN	0.196049	0.00715657
A10	2	JUN	0.192314	0.00315248
A10	3	JUN	0.188972	-0.000459359
A10	4	JUN	0.190236	0.000535523
A10	5	JUN	0.189146	-0.000824024
A10	6	JUN	0.189345	-0.000895112
A10	7	JUN	0.191701	0.00119152
A10	8	JUN	0.189987	-0.000791254
A10	9	JUN	0.195421	0.00437269
A10	10	JUN	0.191844	0.000527003
A10	11	JUN	0.191145	-0.000441806
A10	12	JUN	0.190153	-0.00170332
A10	13	JUN	0.195296	0.0031702
A10	14	JUN	0.190963	-0.00143203
A10	15	JUN	0.190511	-0.00215327
A10	16	JUN	0.193866	0.000932065
A10	17	JUN	0.19187	-0.00133309
A10	18	JUN	0.191553	-0.00191972
A10	19	JUN	0.19319	-0.000551523
A10	20	JUN	0.193145	-0.000866364
A10	21	JUN	0.192951	-0.00132989
A10	22	JUN	0.193121	-0.00142944
A10	23	JUN	0.196436	0.00161626
A10	24	JUN	0.198874	0.00378494
A10	25	JUN	0.205009	0.00965032
A10	26	JUN	0.215808	0.0201798
A10	27	JUN	0.237164	0.0412665
A10	28	JUN	0.274875	0.0787087
A10	29	JUN	0.340013	0.143577
A10	30	JUN	0.441696	0.244991
A10	31	JUN	0.574012	0.377037
A10	32	JUN	0.717067	0.519823
A10	33	JUN	0.844086	0.646572
A10	34	JUN	0.950488	0.752705
A10	35	JUN	1.0305	0.832449
A10	36	JUN	1.09037	0.892052
A10	37	JUN	1.13661	0.938019
A10	38	JUN	1.17431	0.975446
A10	39	JUN	1.20326	1.00413
A10	40	JUN	1.22565	1.02625
A10	41	JUN	1.2413	1.04163
A10	42	JUN	1.25516	1.05523
A10	43	JUN	1.26757	1.06737
A10	44	JUN	1.28145	1.08097
A10	45	JUN	1.28895	1.0882
A11	1	JUN	0.211046	0.00775936
A11	2	JUN	0.207553	0.00386534
A11	3	JUN	0.206147	0.00205861
A11	4	JUN	0.203613	-0.000876276
A11	5	JUN	0.206115	0.00122503
A11	6	JUN	0.204596	-0.000695105
A11	7	JUN	0.206039	0.000347426
A11	8	JUN	0.206129	3.71851e-05
A11	9	JUN	0.206177	-0.000315807
A11	10	JUN	0.205352	-0.00154196
A11	11	JUN	0.207183	-0.000111018
A11	12	JUN	0.209149	0.00145384
A11	13	JUN	0.208015	-8.04825e-05
A11	14	JUN	0.207171	-0.00132543
A11	15	JUN	0.209573	0.00067559
A11	16	JUN	0.208535	-0.0007624
A11	17	JUN	0.209196	-0.00050294
A11	18	JUN	0.209076	-0.0010229
A11	19	JUN	0.210107	-0.000392758
A11	20	JUN	0.210313	-0.000587396
A11	21	JUN	0.209425	-0.00187623
A11	22	JUN	0.21186	0.000158023
A11	23	JUN	0.212897	0.000794051
A11	24	JUN	0.215845	0.00334094
A11	25	JUN	0.219799	0.00689442
A11	26	JUN	0.230231	0.0169263
A11	27	JUN	0.248677	0.034971
A11	28	JUN	0.283534	0.0694275
A11	29	JUN	0.342306	0.127799
A11	30	JUN	0.43615	0.221242
A11	31	JUN	0.56299	0.347681
A11	32	JUN	0.708504	0.492795
A11	33	JUN	0.840549	0.624439
A11	34	JUN	0.952168	0.735657
A11	35	JUN	1.04233	0.825419
A11	36	JUN	1.10564	0.88833
A11	37	JUN	1.15293	0.935218
A11	38	JUN	1.19199	0.973873
A11	39	JUN	1.22096	1.00244
A11	40	JUN	1.24808	1.02917
A11	41	JUN	1.26859	1.04927
A11	42	JUN	1.28337	1.06366
A11	43	JUN	1.29404	1.07392
A11	44	JUN	1.30936	1.08884
A11	45	JUN	1.31812	1.0972
A12	1	JUN	0.259423	0.0146125
A12	2	JUN	0.251953	0.00690286
A12	3	JUN	0.24956	0.0042693
A12	4	JUN	0.248399	0.00286832
A12	5	JUN	0.245259	-0.000511689
A12	6	JUN	0.245532	-0.000478867
A12	7	JUN	0.246173	-7.82545e-05
A12	8	JUN	0.245322	-0.00116877
A12	9	JUN	0.245944	-0.000787367
A12	10	JUN	0.245362	-0.00160925
A12	11	JUN	0.247133	-7.79187e-05
A12	12	JUN	0.246728	-0.000723428
A12	13	JUN	0.247119	-0.00057238
A12	14	JUN	0.246798	-0.00113344
A12	15	JUN	0.245769	-0.00240194
A12	16	JUN	0.24838	-3.10223e-05
A12	17	JUN	0.247769	-0.000882465
A12	18	JUN	0.247572	-0.00131894
A12	19	JUN	0.247598	-0.00153364
A12	20	JUN	0.248958	-0.000413617
A12	21	JUN	0.247728	-0.00188337
A12	22	JUN	0.250631	0.000779598
A12	23	JUN	0.252477	0.00238548
A12	24	JUN	0.255635	0.00530367
A12	25	JUN	0.262654	0.0120825
A12	26	JUN	0.275884	0.0250718
A12	27	JUN	0.303904	0.0528523
A12	28	JUN	0.348806	0.0975145
A12	29	JUN	0.424006	0.172474
A12	30	JUN	0.533916	0.282144
A12	31	JUN	0.67158	0.419568
A12	32	JUN	0.805939	0.553686
A12	33	JUN	0.921134	0.668642
A12	34	JUN	1.01712	0.764388
A12	35	JUN	1.08604	0.833069
A12	36	JUN	1.14147	0.88826
A12	37	JUN	1.17925	0.925797
A12	38	JUN	1.20918	0.955487
A12	39	JUN	1.23511	0.981173
A12	40	JUN	1.26005	1.00587
A12	41	JUN	1.27347	1.01905
A12	42	JUN	1.28373	1.02907
A12	43	JUN	1.29652	1.04163
A12	44	JUN	1.30683	1.0517
A12	45	JUN	1.31242	1.05705
B1	1	VEGFA	0.332451	0.0152316
B1	2	VEGFA	0.322264	0.00397085
B1	3	VEGFA	0.318899	-0.000467293
B1	4	VEGFA	0.321076	0.000636457
B1	5	VEGFA	0.321433	-7.94938e-05
B1	6	VEGFA	0.322312	-0.000273159
B1	7	VEGFA	0.324398	0.000739783
B1	8	VEGFA	0.325498	0.000765732
B1	9	VEGFA	0.326044	0.000239324
B1	10	VEGFA	0.327709	0.00083098
B1	11	VEGFA	0.32806	0.000108712
B1	12	VEGFA	0.327741	-0.00128327
B1	13	VEGFA	0.330461	0.000363593
B1	14	VEGFA	0.329725	-0.00144616
B1	15	VEGFA	0.330964	-0.0012799
B1	16	VEGFA	0.331924	-0.00139316
B1	17	VEGFA	0.333386	-0.00100434
B1	18	VEGFA	0.335355	-0.000108433
B1	19	VEGFA	0.340188	0.00365064
B1	20	VEGFA	0.348309	0.0106992
B1	21	VEGFA	0.365051	0.0263675
B1	22	VEGFA	0.396112	0.0563551
B1	23	VEGFA	0.449059	0.108229
B1	24	VEGFA	0.538161	0.196258
B1	25	VEGFA	0.662862	0.319886
B1	26	VEGFA	0.811353	0.467304
B1	27	VEGFA	0.950007	0.604884
B1	28	VEGFA	1.06215	0.715956
B1	29	VEGFA	1.14682	0.799553
B1	30	VEGFA	1.21098	0.862641
B1	31	VEGFA	1.25557	0.906155
B1	32	VEGFA	1.29018	0.939691
B1	33	VEGFA	1.31256	0.960995
B1	34	VEGFA	1.3363	0.983668
B1	35	VEGFA	1.35185	0.99814
B1	36	VEGFA	1.36597	1.01119
B1	37	VEGFA	1.37503	1.01918
B1	38	VEGFA	1.38459	1.02767
B1	39	VEGFA	1.39087	1.03287
B1	40	VEGFA	1.39823	1.03915
B1	41	VEGFA	1.40247	1.04233
B1	42	VEGFA	1.40649	1.04527
B1	43	VEGFA	1.40368	1.04139
B1	44	VEGFA	1.40989	1.04652
B1	45	VEGFA	1.41231	1.04787
B2	1	VEGFA	0.19102	0.00536337
B2	2	VEGFA	0.18982	0.00345922
B2	3	VEGFA	0.188841	0.00177615
B2	4	VEGFA	0.18829	0.000521504
B2	5	VEGFA	0.188312	-0.000160492
B2	6	VEGFA	0.188743	-0.000432527
B2	7	VEGFA	0.191011	0.00113119
B2	8	VEGFA	0.19116	0.000576282
B2	9	VEGFA	0.191012	-0.000275513
B2	10	VEGFA	0.192166	0.000174934
B2	11	VEGFA	0.191291	-0.00140432
B2	12	VEGFA	0.192554	-0.000844528
B2	13	VEGFA	0.192123	-0.00197988
B2	14	VEGFA	0.193363	-0.00144352
B2	15	VEGFA	0.19421	-0.0013005
B2	16	VEGFA	0.194112	-0.00210199
B2	17	VEGFA	0.196344	-0.00057355
B2	18	VEGFA	0.199416	0.00179438
B2	19	VEGFA	0.202868	0.00454239
B2	20	VEGFA	0.212526	0.0134967
B2	21	VEGFA	0.229304	0.0295712
B2	22	VEGFA	0.260511	0.0600742
B2	23	VEGFA	0.317062	0.115922
B2	24	VEGFA	0.406459	0.204615
B2	25	VEGFA	0.533917	0.331369
B2	26	VEGFA	0.682731	0.479479
B2	27	VEGFA	0.8243	0.620344
B2	28	VEGFA	0.937761	0.733101
B2	29	VEGFA	1.02112	0.815758
B2	30	VEGFA	1.08353	0.877463
B2	31	VEGFA	1.12956	0.922791
B2	32	VEGFA	1.16183	0.954352
B2	33	VEGFA	1.18454	0.976363
B2	34	VEGFA	1.20781	0.998932
B2	35	VEGFA	1.22406	1.01447
B2	36	VEGFA	1.23601	1.02572
B2	37	VEGFA	1.24814	1.03715
B2	38	VEGFA	1.25508	1.04338
B2	39	VEGFA	1.26395	1.05155
B2	40	VEGFA	1.266	1.05289
B2	41	VEGFA	1.27375	1.05995
B2	42	VEGFA	1.27329	1.05878
B2	43	VEGFA	1.27673	1.06151
B2	44	VEGFA	1.27922	1.0633
B2	45	VEGFA	1.27911	1.06249
B3	1	VEGFA	0.170415	0.00500444
B3	2	VEGFA	0.167446	0.00150978
B3	3	VEGFA	0.167237	0.000775323
B3	4	VEGFA	0.168858	0.0018715
B3	5	VEGFA	0.167995	0.000482334
B3	6	VEGFA	0.167715	-0.000323157
B3	7	VEGFA	0.168513	-5.04447e-05
B3	8	VEGFA	0.169126	3.68971e-05
B3	9	VEGFA	0.168813	-0.000801093
B3	10	VEGFA	0.169897	-0.000242905
B3	11	VEGFA	0.170016	-0.000648747
B3	12	VEGFA	0.170898	-0.000292767
B3	13	VEGFA	0.17081	-0.000905958
B3	14	VEGFA	0.170096	-0.0021453
B3	15	VEGFA	0.171937	-0.000829607
B3	16	VEGFA	0.172024	-0.00126804
B3	17	VEGFA	0.172342	-0.00147566
B3	18	VEGFA	0.175186	0.000842619
B3	19	VEGFA	0.179844	0.004975
B3	20	VEGFA	0.189273	0.0138792
B3	21	VEGFA	0.204918	0.0289984
B3	22	VEGFA	0.237489	0.0610441
B3	23	VEGFA	0.293662	0.116692
B3	24	VEGFA	0.383523	0.206027
B3	25	VEGFA	0.509883	0.331862
B3	26	VEGFA	0.657896	0.479349
B3	27	VEGFA	0.795602	0.61653
B3	28	VEGFA	0.90501	0.725412
B3	29	VEGFA	0.98927	0.809147
B3	30	VEGFA	1.04791	0.867263
B3	31	VEGFA	1.09244	0.911265
B3	32	VEGFA	1.12835	0.946646
B3	33	VEGFA	1.15067	0.968445
B3	34	VEGFA	1.17015	0.987395
B3	35	VEGFA	1.18484	1.00157
B3	36	VEGFA	1.19903	1.01523
B3	37	VEGFA	1.20983	1.0255
B3	38	VEGFA	1.21362	1.02876
B3	39	VEGFA	1.22348	1.0381
B3	40	VEGFA	1.22869	1.04279
B3	41	VEGFA	1.2309	1.04448
B3	42	VEGFA	1.23236	1.04541
B3	43	VEGFA	1.23588	1.0484
B3	44	VEGFA	1.23653	1.04852
B3	45	VEGFA	1.24225	1.05372
B4	1	LI-6	0.147514	0.00431849
B4	2	LI-6	0.145431	0.00192982
B4	3	LI-6	0.144391	0.000584185
B4	4	LI-6	0.144954	0.000841855
B4	5	LI-6	0.144936	0.000518841
B4	6	LI-6	0.144466	-0.000257168
B4	7	LI-6	0.144893	-0.000135755
B4	8	LI-6	0.145165	-0.000169075
B4	9	LI-6	0.145751	0.000111453
B4	10	LI-6	0.145603	-0.000342348
B4	11	LI-6	0.147044	0.000793551
B4	12	LI-6	0.146869	0.000312675
B4	13	LI-6	0.146175	-0.000686583
B4	14	LI-6	0.146222	-0.000944911
B4	15	LI-6	0.147403	-7.00056e-05
B4	16	LI-6	0.147895	0.000116675
B4	17	LI-6	0.147186	-0.000897991
B4	18	LI-6	0.147742	-0.000647265
B4	19	LI-6	0.147641	-0.00105331
B4	20	LI-6	0.149112	0.000111753
B4	21	LI-6	0.148605	-0.000700168
B4	22	LI-6	0.14819	-0.00142109
B4	23	LI-6	0.149814	-0.00010256
B4	24	LI-6	0.150724	0.000501607
B4	25	LI-6	0.154063	0.00353563
B4	26	LI-6	0.157878	0.00704476
B4	27	LI-6	0.168321	0.0171822
B4	28	LI-6	0.188595	0.037151
B4	29	LI-6	0.221825	0.0700758
B4	30	LI-6	0.285311	0.133256
B4	31	LI-6	0.392276	0.239916
B4	32	LI-6	0.543609	0.390942
B4	33	LI-6	0.718464	0.565493
B4	34	LI-6	0.874058	0.720781
B4	35	LI-6	0.984401	0.830818
B4	36	LI-6	1.04648	0.892592
B4	37	LI-6	1.08949	0.935299
B4	38	LI-6	1.12157	0.967072
B4	39	LI-6	1.14968	0.994873
B4	40	LI-6	1.17268	1.01757
B4	41	LI-6	1.18877	1.03336
B4	42	LI-6	1.20189	1.04617
B4	43	LI-6	1.21515	1.05912
B4	44	LI-6	1.23002	1.07369
B4	45	LI-6	1.23468	1.07804
B5	1	LI-6	0.168692	0.00228429
B5	2	LI-6	0.165702	-0.00117896
B5	3	LI-6	0.165905	-0.00144897
B5	4	LI-6	0.166891	-0.000936498
B5	5	LI-6	0.167868	-0.000432784
B5	6	LI-6	0.168735	-3.88628e-05
B5	7	LI-6	0.170759	0.00151239
B5	8	LI-6	0.17109	0.00137046
B5	9	LI-6	0.170544	0.000351337
B5	10	LI-6	0.172574	0.00190803
B5	11	LI-6	0.171732	0.000593425
B5	12	LI-6	0.17145	-0.000162263
B5	13	LI-6	0.172153	6.81482e-05
B5	14	LI-6	0.172729	0.000170514
B5	15	LI-6	0.17358	0.000548327
B5	16	LI-6	0.174033	0.000528518
B5	17	LI-6	0.173463	-0.000515046
B5	18	LI-6	0.173429	-0.001022
B5	19	LI-6	0.173821	-0.00110261
B5	20	LI-6	0.173842	-0.00155478
B5	21	LI-6	0.174696	-0.00117421
B5	22	LI-6	0.175012	-0.00133173
B5	23	LI-6	0.175299	-0.00151717
B5	24	LI-6	0.176362	-0.000927206
B5	25	LI-6	0.178237	0.000473885
B5	26	LI-6	0.182875	0.0046391
B5	27	LI-6	0.192487	0.0137778
B5	28	LI-6	0.212147	0.0329647
B5	29	LI-6	0.244734	0.065079
B5	30	LI-6	0.304692	0.124564
B5	31	LI-6	0.407772	0.22717
B5	32	LI-6	0.554383	0.373309
B5	33	LI-6	0.729999	0.548451
B5	34	LI-6	0.892418	0.710398
B5	35	LI-6	1.00763	0.825137
B5	36	LI-6	1.0763	0.893335
B5	37	LI-6	1.11981	0.936368
B5	38	LI-6	1.15271	0.968793
B5	39	LI-6	1.18197	0.997579
B5	40	LI-6	1.20216	1.0173
B5	41	LI-6	1.2195	1.03416
B5	42	LI-6	1.23259	1.04679
B5	43	LI-6	1.2463	1.06002
B5	44	LI-6	1.25811	1.07135
B5	45	LI-6	1.26935	1.08213
B6	1	LI-6	0.147657	0.00289855
B6	2	LI-6	0.1458	0.000679443
B6	3	LI-6	0.145389	-9.49423e-05
B6	4	LI-6	0.145232	-0.000614696
B6	5	LI-6	0.146347	0.000138169
B6	6	LI-6	0.145425	-0.00114716
B6	7	LI-6	0.146337	-0.000598339
B6	8	LI-6	0.148499	0.00120151
B6	9	LI-6	0.149064	0.00140332
B6	10	LI-6	0.148656	0.00063221
B6	11	LI-6	0.148806	0.000419376
B6	12	LI-6	0.149808	0.00105902
B6	13	LI-6	0.149704	0.000592301
B6	14	LI-6	0.148809	-0.000665761
B6	15	LI-6	0.150257	0.000419385
B6	16	LI-6	0.149929	-0.000270838
B6	17	LI-6	0.149784	-0.000778954
B6	18	LI-6	0.150105	-0.000820693
B6	19	LI-6	0.150506	-0.000782667
B6	20	LI-6	0.150515	-0.00113624
B6	21	LI-6	0.152212	0.000197291
B6	22	LI-6	0.150498	-0.00187896
B6	23	LI-6	0.151778	-0.000961605
B6	24	LI-6	0.153487	0.000383745
B6	25	LI-6	0.15677	0.00330454
B6	26	LI-6	0.16323	0.00940179
B6	27	LI-6	0.175842	0.0216503
B6	28	LI-6	0.198126	0.0435723
B6	29	LI-6	0.241474	0.086557
B6	30	LI-6	0.318019	0.162739
B6	31	LI-6	0.439515	0.283873
B6	32	LI-6	0.603908	0.447903
B6	33	LI-6	0.781823	0.625455
B6	34	LI-6	0.930311	0.77358
B6	35	LI-6	1.02409	0.866999
B6	36	LI-6	1.08238	0.924927
B6	37	LI-6	1.12047	0.962649
B6	38	LI-6	1.15025	0.992068
B6	39	LI-6	1.17517	1.01662
B6	40	LI-6	1.19668	1.03777
B6	41	LI-6	1.20999	1.05072
B6	42	LI-6	1.22198	1.06235
B6	43	LI-6	1.2356	1.0756
B6	44	LI-6	1.24761	1.08725
B6	45	LI-6	1.25511	1.09439
B7	1	MAPK3	0.155857	0.00532591
B7	2	MAPK3	0.152944	0.00195108
B7	3	MAPK3	0.15231	0.000854123
B7	4	MAPK3	0.152397	0.000479243
B7	5	MAPK3	0.152951	0.000571172
B7	6	MAPK3	0.153111	0.000268205
B7	7	MAPK3	0.153408	0.000103074
B7	8	MAPK3	0.153494	-0.000273206
B7	9	MAPK3	0.15365	-0.000579466
B7	10	MAPK3	0.154321	-0.000370608
B7	11	MAPK3	0.155572	0.000418829
B7	12	MAPK3	0.154848	-0.000767791
B7	13	MAPK3	0.156029	-4.91047e-05
B7	14	MAPK3	0.155522	-0.00101805
B7	15	MAPK3	0.156114	-0.000888733
B7	16	MAPK3	0.156473	-0.000992114
B7	17	MAPK3	0.156599	-0.00132856
B7	18	MAPK3	0.157186	-0.00120326
B7	19	MAPK3	0.159989	0.00113751
B7	20	MAPK3	0.162953	0.00363873
B7	21	MAPK3	0.16896	0.00918389
B7	22	MAPK3	0.180415	0.0201767
B7	23	MAPK3	0.203246	0.0425453
B7	24	MAPK3	0.242523	0.0813602
B7	25	MAPK3	0.310097	0.148472
B7	26	MAPK3	0.411159	0.249072
B7	27	MAPK3	0.54007	0.377521
B7	28	MAPK3	0.676926	0.513914
B7	29	MAPK3	0.799253	0.635778
B7	30	MAPK3	0.899309	0.735373
B7	31	MAPK3	0.979315	0.814916
B7	32	MAPK3	1.0377	0.87284
B7	33	MAPK3	1.07819	0.912867
B7	34	MAPK3	1.1119	0.946117
B7	35	MAPK3	1.14407	0.977824
B7	36	MAPK3	1.16508	0.998366
B7	37	MAPK3	1.18155	1.01438
B7	38	MAPK3	1.19464	1.027
B7	39	MAPK3	1.20978	1.04169
B7	40	MAPK3	1.22274	1.05418
B7	41	MAPK3	1.22928	1.06026
B7	42	MAPK3	1.23537	1.06588
B7	43	MAPK3	1.24255	1.07261
B7	44	MAPK3	1.25029	1.07988
B7	45	MAPK3	1.25736	1.08649
B8	1	MAPK3	0.150063	0.00374362
B8	2	MAPK3	0.147694	0.000918478
B8	3	MAPK3	0.14851	0.00127757
B8	4	MAPK3	0.148425	0.00073621
B8	5	MAPK3	0.148529	0.000383889
B8	6	MAPK3	0.148208	-0.000393652
B8	7	MAPK3	0.150112	0.00105458
B8	8	MAPK3	0.149169	-0.000344908
B8	9	MAPK3	0.15008	0.000109743
B8	10	MAPK3	0.150318	-0.00010884
B8	11	MAPK3	0.149728	-0.00115518
B8	12	MAPK3	0.150914	-0.000425129
B8	13	MAPK3	0.150538	-0.00125779
B8	14	MAPK3	0.151507	-0.000745084
B8	15	MAPK3	0.151286	-0.00142303
B8	16	MAPK3	0.15155	-0.00161447
B8	17	MAPK3	0.15272	-0.000901467
B8	18	MAPK3	0.153841	-0.000236412
B8	19	MAPK3	0.154922	0.000388366
B8	20	MAPK3	0.159646	0.00465561
B8	21	MAPK3	0.164941	0.00949425
B8	22	MAPK3	0.178215	0.022312
B8	23	MAPK3	0.200559	0.0441998
B8	24	MAPK3	0.241874	0.0850581
B8	25	MAPK3	0.309443	0.15217
B8	26	MAPK3	0.413356	0.255627
B8	27	MAPK3	0.544083	0.385898
B8	28	MAPK3	0.682685	0.524044
B8	29	MAPK3	0.803501	0.644403
B8	30	MAPK3	0.902222	0.742668
B8	31	MAPK3	0.979218	0.819208
B8	32	MAPK3	1.03713	0.87666
B8	33	MAPK3	1.07755	0.916622
B8	34	MAPK3	1.11063	0.949254
B8	35	MAPK3	1.14028	0.978444
B8	36	MAPK3	1.16251	1.00022
B8	37	MAPK3	1.17889	1.01614
B8	38	MAPK3	1.19268	1.02947
B8	39	MAPK3	1.20585	1.04219
B8	40	MAPK3	1.21503	1.05091
B8	41	MAPK3	1.22342	1.05884
B8	42	MAPK3	1.22793	1.0629
B8	43	MAPK3	1.23471	1.06922
B8	44	MAPK3	1.24164	1.0757
B8	45	MAPK3	1.24566	1.07926
B9	1	MAPK3	0.158801	0.00456732
B9	2	MAPK3	0.155133	0.000332754
B9	3	MAPK3	0.155689	0.000321596
B9	4	MAPK3	0.155814	-0.000120593
B9	5	MAPK3	0.156216	-0.000285172
B9	6	MAPK3	0.158628	0.00155992
B9	7	MAPK3	0.158038	0.000402612
B9	8	MAPK3	0.15829	8.81566e-05
B9	9	MAPK3	0.15943	0.000661572
B9	10	MAPK3	0.159396	6.01194e-05
B9	11	MAPK3	0.159568	-0.000334907
B9	12	MAPK3	0.159462	-0.00100763
B9	13	MAPK3	0.1602	-0.000836935
B9	14	MAPK3	0.160668	-0.000935771
B9	15	MAPK3	0.16094	-0.00123001
B9	16	MAPK3	0.16184	-0.000897513
B9	17	MAPK3	0.162509	-0.000795243
B9	18	MAPK3	0.163293	-0.000577459
B9	19	MAPK3	0.164998	0.000559816
B9	20	MAPK3	0.168372	0.00336744
B9	21	MAPK3	0.175351	0.00977951
B9	22	MAPK3	0.187507	0.0213688
B9	23	MAPK3	0.210793	0.0440874
B9	24	MAPK3	0.250494	0.0832219
B9	25	MAPK3	0.320419	0.15258
B9	26	MAPK3	0.423243	0.254836
B9	27	MAPK3	0.55678	0.387807
B9	28	MAPK3	0.696705	0.527165
B9	29	MAPK3	0.820808	0.650701
B9	30	MAPK3	0.923427	0.752754
B9	31	MAPK3	1.00312	0.831884
B9	32	MAPK3	1.06163	0.889821
B9	33	MAPK3	1.1036	0.931228
B9	34	MAPK3	1.13832	0.965382
B9	35	MAPK3	1.169	0.995494
B9	36	MAPK3	1.19004	1.01596
B9	37	MAPK3	1.20664	1.032
B9	38	MAPK3	1.22155	1.04634
B9	39	MAPK3	1.23539	1.05962
B9	40	MAPK3	1.24736	1.07102
B9	41	MAPK3	1.25349	1.07658
B9	42	MAPK3	1.25928	1.0818
B9	43	MAPK3	1.26784	1.0898
B9	44	MAPK3	1.27597	1.09736
B9	45	MAPK3	1.27784	1.09866
B10	1	JUN	0.154467	0.00807409
B10	2	JUN	0.150869	0.00408785
B10	3	JUN	0.149795	0.00262504
B10	4	JUN	0.148716	0.00115861
B10	5	JUN	0.148898	0.000952181
B10	6	JUN	0.14795	-0.000383952
B10	7	JUN	0.149126	0.000404582
B10	8	JUN	0.149324	0.000213707
B10	9	JUN	0.147991	-0.00150735
B10	10	JUN	0.150002	0.000115587
B10	11	JUN	0.150516	0.000242122
B10	12	JUN	0.150379	-0.000282703
B10	13	JUN	0.150218	-0.000832532
B10	14	JUN	0.150218	-0.00122043
B10	15	JUN	0.151386	-0.000440926
B10	16	JUN	0.150952	-0.0012628
B10	17	JUN	0.149928	-0.00267479
B10	18	JUN	0.150941	-0.00204976
B10	19	JUN	0.152474	-0.000904434
B10	20	JUN	0.152381	-0.00138546
B10	21	JUN	0.153001	-0.00115347
B10	22	JUN	0.154328	-0.000215273
B10	23	JUN	0.156802	0.00187129
B10	24	JUN	0.16205	0.00673077
B10	25	JUN	0.171436	0.0157292
B10	26	JUN	0.189633	0.0335373
B10	27	JUN	0.221159	0.0646761
B10	28	JUN	0.279509	0.122638
B10	29	JUN	0.369766	0.212507
B10	30	JUN	0.492921	0.335274
B10	31	JUN	0.636067	0.478031
B10	32	JUN	0.771076	0.612652
B10	33	JUN	0.88157	0.722758
B10	34	JUN	0.967681	0.808481
B10	35	JUN	1.03511	0.875526
B10	36	JUN	1.08436	0.924389
B10	37	JUN	1.12318	0.962815
B10	38	JUN	1.15158	0.990823
B10	39	JUN	1.17817	1.01703
B10	40	JUN	1.19949	1.03796
B10	41	JUN	1.2142	1.05228
B10	42	JUN	1.22685	1.06455
B10	43	JUN	1.23744	1.07475
B10	44	JUN	1.25034	1.08726
B10	45	JUN	1.25745	1.09398
B11	1	JUN	0.181077	0.00398408
B11	2	JUN	0.178318	0.000718051
B11	3	JUN	0.178254	0.000147713
B11	4	JUN	0.178959	0.000345529
B11	5	JUN	0.179272	0.000151713
B11	6	JUN	0.179336	-0.000291116
B11	7	JUN	0.180488	0.000354778
B11	8	JUN	0.181726	0.00108533
B11	9	JUN	0.180833	-0.000313636
B11	10	JUN	0.182171	0.000517048
B11	11	JUN	0.18297	0.000809844
B11	12	JUN	0.182839	0.00017178
B11	13	JUN	0.182074	-0.0011
B11	14	JUN	0.183097	-0.000583717
B11	15	JUN	0.183711	-0.00047635
B11	16	JUN	0.184193	-0.000501366
B11	17	JUN	0.18364	-0.00156107
B11	18	JUN	0.184588	-0.00111941
B11	19	JUN	0.185323	-0.00089108
B11	20	JUN	0.186412	-0.000309082
B11	21	JUN	0.186563	-0.000664948
B11	22	JUN	0.188897	0.00116286
B11	23	JUN	0.191306	0.00306519
B11	24	JUN	0.197801	0.00905303
B11	25	JUN	0.208626	0.0193716
B11	26	JUN	0.229357	0.0395961
B11	27	JUN	0.267849	0.0775811
B11	28	JUN	0.332974	0.142199
B11	29	JUN	0.433357	0.242076
B11	30	JUN	0.563049	0.371261
B11	31	JUN	0.703482	0.511187
B11	32	JUN	0.8338	0.640998
B11	33	JUN	0.935524	0.742216
B11	34	JUN	1.0157	0.821889
B11	35	JUN	1.07993	0.885603
B11	36	JUN	1.12417	0.929339
B11	37	JUN	1.15704	0.9617
B11	38	JUN	1.18664	0.990803
B11	39	JUN	1.21374	1.0174
B11	40	JUN	1.2303	1.03345
B11	41	JUN	1.24509	1.04773
B11	42	JUN	1.2527	1.05483
B11	43	JUN	1.26557	1.06719
B11	44	JUN	1.27789	1.07901
B11	45	JUN	1.28572	1.08633
B12	1	JUN	0.212129	0.0085048
B12	2	JUN	0.207527	0.00333705
B12	3	JUN	0.208082	0.00332653
B12	4	JUN	0.205121	-0.000200323
B12	5	JUN	0.206928	0.00104115
B12	6	JUN	0.206096	-0.000356905
B12	7	JUN	0.206576	-0.000442288
B12	8	JUN	0.207016	-0.000567727
B12	9	JUN	0.207631	-0.000518776
B12	10	JUN	0.20905	0.000334881
B12	11	JUN	0.208709	-0.000571676
B12	12	JUN	0.209256	-0.000590481
B12	13	JUN	0.209262	-0.0011503
B12	14	JUN	0.209748	-0.00122946
B12	15	JUN	0.210819	-0.000724532
B12	16	JUN	0.212397	0.000287823
B12	17	JUN	0.211615	-0.0010596
B12	18	JUN	0.212103	-0.00113747
B12	19	JUN	0.213196	-0.000610211
B12	20	JUN	0.213205	-0.00116622
B12	21	JUN	0.214919	-1.75921e-05
B12	22	JUN	0.216331	0.000828838
B12	23	JUN	0.220593	0.00452434
B12	24	JUN	0.226415	0.00978125
B12	25	JUN	0.238533	0.0213337
B12	26	JUN	0.263972	0.0462065
B12	27	JUN	0.306561	0.0882301
B12	28	JUN	0.374536	0.15564
B12	29	JUN	0.480016	0.260554
B12	30	JUN	0.611968	0.39194
B12	31	JUN	0.752218	0.531625
B12	32	JUN	0.87597	0.654811
B12	33	JUN	0.971383	0.749658
B12	34	JUN	1.04914	0.82685
B12	35	JUN	1.1063	0.883449
B12	36	JUN	1.14855	0.925124
B12	37	JUN	1.17851	0.954522
B12	38	JUN	1.20484	0.980287
B12	39	JUN	1.23279	1.00768
B12	40	JUN	1.25145	1.02576
B12	41	JUN	1.26086	1.03461
B12	42	JUN	1.27202	1.04521
B12	43	JUN	1.27942	1.05204
B12	44	JUN	1.29287	1.06493
B12	45	JUN	1.30062	1.07211
C1	1	VEGFA	0.282824	0.00721959
C1	2	VEGFA	0.279511	0.00285175
C1	3	VEGFA	0.277807	9.2819e-05
C1	4	VEGFA	0.27814	-0.000628764
C1	5	VEGFA	0.278217	-0.0016065
C1	6	VEGFA	0.281144	0.000265615
C1	7	VEGFA	0.283466	0.00153319
C1	8	VEGFA	0.282954	-3.34104e-05
C1	9	VEGFA	0.285842	0.00179996
C1	10	VEGFA	0.28569	0.000592837
C1	11	VEGFA	0.285636	-0.000515938
C1	12	VEGFA	0.28679	-0.000416735
C1	13	VEGFA	0.288334	7.30269e-05
C1	14	VEGFA	0.290085	0.00076914
C1	15	VEGFA	0.288834	-0.00153629
C1	16	VEGFA	0.2907	-0.000725644
C1	17	VEGFA	0.290702	-0.00177863
C1	18	VEGFA	0.293794	0.000258589
C1	19	VEGFA	0.296446	0.00185673
C1	20	VEGFA	0.300419	0.00477446
C1	21	VEGFA	0.311895	0.0151955
C1	22	VEGFA	0.333378	0.0356244
C1	23	VEGFA	0.372432	0.0736236
C1	24	VEGFA	0.438761	0.138897
C1	25	VEGFA	0.543408	0.242489
C1	26	VEGFA	0.681368	0.379395
C1	27	VEGFA	0.830442	0.527415
C1	28	VEGFA	0.964024	0.659942
C1	29	VEGFA	1.06645	0.761314
C1	30	VEGFA	1.14174	0.835548
C1	31	VEGFA	1.19532	0.888075
C1	32	VEGFA	1.23856	0.930261
C1	33	VEGFA	1.27049	0.961134
C1	34	VEGFA	1.29228	0.981866
C1	35	VEGFA	1.31317	1.00171
C1	36	VEGFA	1.32502	1.0125
C1	37	VEGFA	1.33772	1.02415
C1	38	VEGFA	1.34892	1.03429
C1	39	VEGFA	1.35998	1.0443
C1	40	VEGFA	1.36684	1.0501
C1	41	VEGFA	1.36851	1.05072
C1	42	VEGFA	1.37255	1.0537
C1	43	VEGFA	1.37594	1.05604
C1	44	VEGFA	1.37626	1.0553
C1	45	VEGFA	1.37875	1.05674
C2	1	VEGFA	0.201752	0.00329272
C2	2	VEGFA	0.203922	0.00448163
C2	3	VEGFA	0.200246	-0.000174539
C2	4	VEGFA	0.204762	0.00336018
C2	5	VEGFA	0.197939	-0.00444424
C2	6	VEGFA	0.196881	-0.00648253
C2	7	VEGFA	0.20424	-0.000104715
C2	8	VEGFA	0.223045	0.0177187
C2	9	VEGFA	0.20445	-0.00185676
C2	10	VEGFA	0.205248	-0.00203999
C2	11	VEGFA	0.207763	-0.000506454
C2	12	VEGFA	0.208835	-0.000414966
C2	13	VEGFA	0.204908	-0.00532264
C2	14	VEGFA	0.212546	0.00133423
C2	15	VEGFA	0.207407	-0.0047865
C2	16	VEGFA	0.214167	0.000992937
C2	17	VEGFA	0.20936	-0.00479539
C2	18	VEGFA	0.220126	0.00499025
C2	19	VEGFA	0.213799	-0.002318
C2	20	VEGFA	0.221949	0.00485044
C2	21	VEGFA	0.227791	0.00971228
C2	22	VEGFA	0.25435	0.0352903
C2	23	VEGFA	0.28825	0.0682089
C2	24	VEGFA	0.35445	0.133427
C2	25	VEGFA	0.457896	0.235893
C2	26	VEGFA	0.596703	0.373719
C2	27	VEGFA	0.74291	0.518944
C2	28	VEGFA	0.873169	0.648223
C2	29	VEGFA	0.974237	0.74831
C2	30	VEGFA	1.05146	0.824551
C2	31	VEGFA	1.10904	0.881156
C2	32	VEGFA	1.14573	0.916864
C2	33	VEGFA	1.17545	0.945602
C2	34	VEGFA	1.19942	0.968587
C2	35	VEGFA	1.2177	0.985883
C2	36	VEGFA	1.23567	1.00287
C2	37	VEGFA	1.24604	1.01226
C2	38	VEGFA	1.25509	1.02033
C2	39	VEGFA	1.26231	1.02657
C2	40	VEGFA	1.26912	1.0324
C2	41	VEGFA	1.27601	1.03831
C2	42	VEGFA	1.2765	1.03782
C2	43	VEGFA	1.27864	1.03898
C2	44	VEGFA	1.28471	1.04407
C2	45	VEGFA	1.28487	1.04325
C3	1	VEGFA	0.159633	0.00381091
C3	2	VEGFA	0.157923	0.00168431
C3	3	VEGFA	0.15781	0.00115378
C3	4	VEGFA	0.158906	0.00183377
C3	5	VEGFA	0.15758	9.04593e-05
C3	6	VEGFA	0.157424	-0.000483009
C3	7	VEGFA	0.158408	8.48782e-05
C3	8	VEGFA	0.157909	-0.000831719
C3	9	VEGFA	0.158111	-0.0010461
C3	10	VEGFA	0.159244	-0.000329721
C3	11	VEGFA	0.159331	-0.000659615
C3	12	VEGFA	0.159925	-0.00048348
C3	13	VEGFA	0.160237	-0.00058774
C3	14	VEGFA	0.160443	-0.000798364
C3	15	VEGFA	0.160584	-0.00107508
C3	16	VEGFA	0.162346	0.000270071
C3	17	VEGFA	0.162006	-0.000486502
C3	18	VEGFA	0.164157	0.00124701
C3	19	VEGFA	0.165428	0.00210134
C3	20	VEGFA	0.171652	0.00790854
C3	21	VEGFA	0.184012	0.0198514
C3	22	VEGFA	0.204561	0.0399842
C3	23	VEGFA	0.242486	0.0774922
C3	24	VEGFA	0.308617	0.143206
C3	25	VEGFA	0.412194	0.246366
C3	26	VEGFA	0.548397	0.382152
C3	27	VEGFA	0.69577	0.529108
C3	28	VEGFA	0.823882	0.656803
C3	29	VEGFA	0.924568	0.757072
C3	30	VEGFA	0.99883	0.830918
C3	31	VEGFA	1.05632	0.887994
C3	32	VEGFA	1.09518	0.926437
C3	33	VEGFA	1.12252	0.953359
C3	34	VEGFA	1.14639	0.976813
C3	35	VEGFA	1.16695	0.996955
C3	36	VEGFA	1.17943	1.00902
C3	37	VEGFA	1.19002	1.01919
C3	38	VEGFA	1.19842	1.02717
C3	39	VEGFA	1.21211	1.04044
C3	40	VEGFA	1.21519	1.04311
C3	41	VEGFA	1.21991	1.04741
C3	42	VEGFA	1.2215	1.04858
C3	43	VEGFA	1.22429	1.05096
C3	44	VEGFA	1.2285	1.05475
C3	45	VEGFA	1.2286	1.05443
C4	1	LI-6	0.15765	0.00268153
C4	2	LI-6	0.155335	2.27197e-05
C4	3	LI-6	0.155758	0.000102831
C4	4	LI-6	0.156259	0.000260563
C4	5	LI-6	0.155716	-0.000625294
C4	6	LI-6	0.157028	0.000342614
C4	7	LI-6	0.156227	-0.000800929
C4	8	LI-6	0.15842	0.00104825
C4	9	LI-6	0.157911	0.000196158
C4	10	LI-6	0.158562	0.000503989
C4	11	LI-6	0.158842	0.00044017
C4	12	LI-6	0.159682	0.000936888
C4	13	LI-6	0.160784	0.00169564
C4	14	LI-6	0.159132	-0.000298919
C4	15	LI-6	0.16042	0.000645296
C4	16	LI-6	0.158643	-0.00147435
C4	17	LI-6	0.160366	-9.48696e-05
C4	18	LI-6	0.158991	-0.00181302
C4	19	LI-6	0.15982	-0.00132794
C4	20	LI-6	0.160345	-0.00114626
C4	21	LI-6	0.160597	-0.00123752
C4	22	LI-6	0.160312	-0.00186574
C4	23	LI-6	0.161307	-0.00121341
C4	24	LI-6	0.162546	-0.000318294
C4	25	LI-6	0.165268	0.0020604
C4	26	LI-6	0.167534	0.00398374
C4	27	LI-6	0.175898	0.0120038
C4	28	LI-6	0.189793	0.025556
C4	29	LI-6	0.215985	0.0514044
C4	30	LI-6	0.264963	0.10004
C4	31	LI-6	0.352429	0.187162
C4	32	LI-6	0.483006	0.317395
C4	33	LI-6	0.650986	0.485033
C4	34	LI-6	0.822367	0.65607
C4	35	LI-6	0.955737	0.789097
C4	36	LI-6	1.03445	0.867469
C4	37	LI-6	1.08405	0.916725
C4	38	LI-6	1.11922	0.951547
C4	39	LI-6	1.15249	0.984474
C4	40	LI-6	1.17563	1.00727
C4	41	LI-6	1.19419	1.02549
C4	42	LI-6	1.20383	1.03479
C4	43	LI-6	1.21835	1.04897
C4	44	LI-6	1.23106	1.06133
C4	45	LI-6	1.24436	1.07429
C5	1	LI-6	0.139026	0.00379003
C5	2	LI-6	0.136159	0.000572687
C5	3	LI-6	0.136057	0.000119971
C5	4	LI-6	0.137197	0.000909624
C5	5	LI-6	0.136965	0.000327193
C5	6	LI-6	0.137953	0.000965019
C5	7	LI-6	0.13747	0.00013134
C5	8	LI-6	0.138266	0.000576449
C5	9	LI-6	0.137983	-5.68547e-05
C5	10	LI-6	0.138013	-0.000377025
C5	11	LI-6	0.139416	0.000675202
C5	12	LI-6	0.138887	-0.000204358
C5	13	LI-6	0.13918	-0.000261329
C5	14	LI-6	0.139359	-0.000433098
C5	15	LI-6	0.139899	-0.000243276
C5	16	LI-6	0.139692	-0.000800494
C5	17	LI-6	0.140267	-0.000575923
C5	18	LI-6	0.140442	-0.000751656
C5	19	LI-6	0.140367	-0.00117745
C5	20	LI-6	0.14038	-0.00151435
C5	21	LI-6	0.140878	-0.00136653
C5	22	LI-6	0.1412	-0.00139513
C5	23	LI-6	0.141984	-0.00096123
C5	24	LI-6	0.142974	-0.00032181
C5	25	LI-6	0.145305	0.00165861
C5	26	LI-6	0.149074	0.00507711
C5	27	LI-6	0.156946	0.0125985
C5	28	LI-6	0.17415	0.0294526
C5	29	LI-6	0.204287	0.0592384
C5	30	LI-6	0.258153	0.112754
C5	31	LI-6	0.351608	0.205858
C5	32	LI-6	0.492729	0.346629
C5	33	LI-6	0.663877	0.517427
C5	34	LI-6	0.829791	0.68299
C5	35	LI-6	0.956473	0.809322
C5	36	LI-6	1.03062	0.883118
C5	37	LI-6	1.07518	0.927327
C5	38	LI-6	1.10967	0.961465
C5	39	LI-6	1.13865	0.990095
C5	40	LI-6	1.16449	1.01559
C5	41	LI-6	1.1804	1.03115
C5	42	LI-6	1.19156	1.04195
C5	43	LI-6	1.20463	1.05467
C5	44	LI-6	1.2175	1.06719
C5	45	LI-6	1.22679	1.07613
C6	1	LI-6	0.137678	0.00328209
C6	2	LI-6	0.134904	0.00017285
C6	3	LI-6	0.134318	-0.000748289
C6	4	LI-6	0.135191	-0.000211246
C6	5	LI-6	0.136902	0.00116469
C6	6	LI-6	0.136244	0.000171382
C6	7	LI-6	0.136499	9.10856e-05
C6	8	LI-6	0.1381	0.00135674
C6	9	LI-6	0.138216	0.00113714
C6	10	LI-6	0.139299	0.00188455
C6	11	LI-6	0.137533	-0.000216661
C6	12	LI-6	0.138009	-7.5556e-05
C6	13	LI-6	0.138204	-0.000216396
C6	14	LI-6	0.138897	0.000140969
C6	15	LI-6	0.138757	-0.000333553
C6	16	LI-6	0.138534	-0.000891939
C6	17	LI-6	0.138555	-0.00120629
C6	18	LI-6	0.13814	-0.00195669
C6	19	LI-6	0.138802	-0.0016301
C6	20	LI-6	0.138988	-0.00178028
C6	21	LI-6	0.139947	-0.00115591
C6	22	LI-6	0.13911	-0.00232842
C6	23	LI-6	0.141453	-0.000320812
C6	24	LI-6	0.141945	-0.000164807
C6	25	LI-6	0.143786	0.00134135
C6	26	LI-6	0.148729	0.00594905
C6	27	LI-6	0.157595	0.01448
C6	28	LI-6	0.17452	0.0310687
C6	29	LI-6	0.206353	0.0625671
C6	30	LI-6	0.263425	0.119303
C6	31	LI-6	0.359959	0.215502
C6	32	LI-6	0.502214	0.357422
C6	33	LI-6	0.67206	0.526933
C6	34	LI-6	0.834149	0.688685
C6	35	LI-6	0.952685	0.806886
C6	36	LI-6	1.0223	0.876164
C6	37	LI-6	1.06336	0.916894
C6	38	LI-6	1.09962	0.952815
C6	39	LI-6	1.12992	0.982775
C6	40	LI-6	1.15267	1.00519
C6	41	LI-6	1.16804	1.02023
C6	42	LI-6	1.17958	1.03143
C6	43	LI-6	1.1919	1.04342
C6	44	LI-6	1.20538	1.05656
C6	45	LI-6	1.21258	1.06343
C7	1	MAPK3	0.47336	0.0188616
C7	2	MAPK3	0.465234	0.0106258
C7	3	MAPK3	0.45913	0.00441179
C7	4	MAPK3	0.455826	0.000997887
C7	5	MAPK3	0.455079	0.000140997
C7	6	MAPK3	0.452599	-0.00244937
C7	7	MAPK3	0.453772	-0.00138601
C7	8	MAPK3	0.454229	-0.00103862
C7	9	MAPK3	0.454026	-0.00135186
C7	10	MAPK3	0.45531	-0.000178492
C7	11	MAPK3	0.457084	0.00148625
C7	12	MAPK3	0.455802	9.38146e-05
C7	13	MAPK3	0.455559	-0.000259207
C7	14	MAPK3	0.45474	-0.00118813
C7	15	MAPK3	0.455259	-0.000779166
C7	16	MAPK3	0.455199	-0.000948784
C7	17	MAPK3	0.455401	-0.000857037
C7	18	MAPK3	0.455329	-0.00103887
C7	19	MAPK3	0.455999	-0.000479617
C7	20	MAPK3	0.457395	0.000806965
C7	21	MAPK3	0.460716	0.00401747
C7	22	MAPK3	0.468253	0.0114444
C7	23	MAPK3	0.482646	0.025728
C7	24	MAPK3	0.511835	0.0548067
C7	25	MAPK3	0.560381	0.103242
C7	26	MAPK3	0.641603	0.184355
C7	27	MAPK3	0.754306	0.296947
C7	28	MAPK3	0.885999	0.428531
C7	29	MAPK3	1.01191	0.554332
C7	30	MAPK3	1.1219	0.664207
C7	31	MAPK3	1.20386	0.746057
C7	32	MAPK3	1.26517	0.807265
C7	33	MAPK3	1.30514	0.847124
C7	34	MAPK3	1.33683	0.878702
C7	35	MAPK3	1.36289	0.904649
C7	36	MAPK3	1.37993	0.921578
C7	37	MAPK3	1.39235	0.933893
C7	38	MAPK3	1.40346	0.944893
C7	39	MAPK3	1.41669	0.958013
C7	40	MAPK3	1.42641	0.967617
C7	41	MAPK3	1.43086	0.971964
C7	42	MAPK3	1.43733	0.978325
C7	43	MAPK3	1.43964	0.980519
C7	44	MAPK3	1.44838	0.989155
C7	45	MAPK3	1.45116	0.991821
C8	1	MAPK3	0.152067	0.00792713
C8	2	MAPK3	0.146477	0.00186747
C8	3	MAPK3	0.146282	0.00120214
C8	4	MAPK3	0.14659	0.00104055
C8	5	MAPK3	0.147131	0.00111257
C8	6	MAPK3	0.14639	-9.8262e-05
C8	7	MAPK3	0.147601	0.000642913
C8	8	MAPK3	0.147057	-0.000370926
C8	9	MAPK3	0.147518	-0.000379309
C8	10	MAPK3	0.147982	-0.000384802
C8	11	MAPK3	0.148667	-0.000169116
C8	12	MAPK3	0.147671	-0.00163527
C8	13	MAPK3	0.149011	-0.000764823
C8	14	MAPK3	0.149464	-0.000781029
C8	15	MAPK3	0.149731	-0.000983649
C8	16	MAPK3	0.150191	-0.000993954
C8	17	MAPK3	0.150026	-0.00162822
C8	18	MAPK3	0.150122	-0.00200204
C8	19	MAPK3	0.151945	-0.00064811
C8	20	MAPK3	0.154695	0.00163189
C8	21	MAPK3	0.158742	0.00520943
C8	22	MAPK3	0.166792	0.0127898
C8	23	MAPK3	0.182806	0.0283343
C8	24	MAPK3	0.213379	0.058437
C8	25	MAPK3	0.26535	0.109939
C8	26	MAPK3	0.34967	0.193789
C8	27	MAPK3	0.466595	0.310244
C8	28	MAPK3	0.602786	0.445966
C8	29	MAPK3	0.733953	0.576663
C8	30	MAPK3	0.843484	0.685724
C8	31	MAPK3	0.928206	0.769977
C8	32	MAPK3	0.988419	0.82972
C8	33	MAPK3	1.03124	0.872076
C8	34	MAPK3	1.0629	0.903262
C8	35	MAPK3	1.08941	0.929305
C8	36	MAPK3	1.10833	0.947755
C8	37	MAPK3	1.12276	0.961713
C8	38	MAPK3	1.13434	0.972825
C8	39	MAPK3	1.14732	0.985337
C8	40	MAPK3	1.15674	0.994287
C8	41	MAPK3	1.16187	0.998945
C8	42	MAPK3	1.16523	1.00184
C8	43	MAPK3	1.17434	1.01048
C8	44	MAPK3	1.17945	1.01512
C8	45	MAPK3	1.18483	1.02002
C9	1	MAPK3	0.152313	0.00340349
C9	2	MAPK3	0.150146	0.000777353
C9	3	MAPK3	0.150931	0.00110447
C9	4	MAPK3	0.150039	-0.00024525
C9	5	MAPK3	0.150163	-0.00057934
C9	6	MAPK3	0.152226	0.00102481
C9	7	MAPK3	0.151241	-0.000418314
C9	8	MAPK3	0.153688	0.00157063
C9	9	MAPK3	0.154384	0.00180822
C9	10	MAPK3	0.152337	-0.000696968
C9	11	MAPK3	0.153486	-6.28973e-06
C9	12	MAPK3	0.152904	-0.00104577
C9	13	MAPK3	0.154577	0.000168758
C9	14	MAPK3	0.154263	-0.000603232
C9	15	MAPK3	0.152522	-0.00280257
C9	16	MAPK3	0.154423	-0.00135982
C9	17	MAPK3	0.15434	-0.0019011
C9	18	MAPK3	0.154329	-0.00237055
C9	19	MAPK3	0.156353	-0.000804575
C9	20	MAPK3	0.159495	0.00187939
C9	21	MAPK3	0.163351	0.0052775
C9	22	MAPK3	0.169957	0.0114254
C9	23	MAPK3	0.184489	0.0254989
C9	24	MAPK3	0.214163	0.0547152
C9	25	MAPK3	0.260977	0.10107
C9	26	MAPK3	0.342647	0.182283
C9	27	MAPK3	0.455794	0.294971
C9	28	MAPK3	0.591455	0.430174
C9	29	MAPK3	0.722739	0.560999
C9	30	MAPK3	0.836984	0.674786
C9	31	MAPK3	0.927655	0.765
C9	32	MAPK3	0.989258	0.826144
C9	33	MAPK3	1.03538	0.87181
C9	34	MAPK3	1.06917	0.905135
C9	35	MAPK3	1.09913	0.934646
C9	36	MAPK3	1.11711	0.95216
C9	37	MAPK3	1.13128	0.96588
C9	38	MAPK3	1.14345	0.977586
C9	39	MAPK3	1.15713	0.990808
C9	40	MAPK3	1.16569	0.998911
C9	41	MAPK3	1.16957	1.00233
C9	42	MAPK3	1.17626	1.00857
C9	43	MAPK3	1.18188	1.01373
C9	44	MAPK3	1.18664	1.01802
C9	45	MAPK3	1.19306	1.02399
C10	1	JUN	0.15323	0.00318582
C10	2	JUN	0.151712	0.00121256
C10	3	JUN	0.147904	-0.00304941
C10	4	JUN	0.151565	0.000156717
C10	5	JUN	0.150003	-0.00186007
C10	6	JUN	0.152395	7.76299e-05
C10	7	JUN	0.156738	0.00396586
C10	8	JUN	0.152454	-0.000773382
C10	9	JUN	0.157066	0.00338456
C10	10	JUN	0.158251	0.0041148
C10	11	JUN	0.152925	-0.00166582
C10	12	JUN	0.156821	0.00177503
C10	13	JUN	0.155533	3.26041e-05
C10	14	JUN	0.154826	-0.00112889
C10	15	JUN	0.154879	-0.00153052
C10	16	JUN	0.157889	0.00102436
C10	17	JUN	0.155637	-0.00168232
C10	18	JUN	0.156408	-0.00136568
C10	19	JUN	0.154834	-0.00339437
C10	20	JUN	0.156468	-0.00221568
C10	21	JUN	0.156819	-0.00231965
C10	22	JUN	0.157948	-0.00164516
C10	23	JUN	0.164393	0.00434571
C10	24	JUN	0.164256	0.00375368
C10	25	JUN	0.172726	0.0117692
C10	26	JUN	0.187748	0.0263368
C10	27	JUN	0.216631	0.0547647
C10	28	JUN	0.264172	0.10185
C10	29	JUN	0.346334	0.183559
C10	30	JUN	0.462672	0.299441
C10	31	JUN	0.600179	0.436494
C10	32	JUN	0.735606	0.571466
C10	33	JUN	0.851413	0.686818
C10	34	JUN	0.939135	0.774085
C10	35	JUN	1.01056	0.845057
C10	36	JUN	1.06109	0.895135
C10	37	JUN	1.10377	0.937352
C10	38	JUN	1.13197	0.965099
C10	39	JUN	1.15981	0.992484
C10	40	JUN	1.18001	1.01223
C10	41	JUN	1.19678	1.02855
C10	42	JUN	1.20853	1.03984
C10	43	JUN	1.22177	1.05263
C10	44	JUN	1.23305	1.06345
C10	45	JUN	1.24061	1.07055
C11	1	JUN	0.167048	0.00422264
C11	2	JUN	0.162944	-0.000253899
C11	3	JUN	0.163369	-0.000200918
C11	4	JUN	0.164367	0.00042516
C11	5	JUN	0.163227	-0.00108729
C11	6	JUN	0.164303	-0.000383259
C11	7	JUN	0.164667	-0.0003913
C11	8	JUN	0.166348	0.000917491
C11	9	JUN	0.165916	0.000113908
C11	10	JUN	0.168707	0.00253316
C11	11	JUN	0.165811	-0.000735341
C11	12	JUN	0.166849	-6.93423e-05
C11	13	JUN	0.170279	0.00298884
C11	14	JUN	0.166225	-0.00143757
C11	15	JUN	0.167274	-0.000760379
C11	16	JUN	0.170047	0.0016401
C11	17	JUN	0.165646	-0.00313317
C11	18	JUN	0.168558	-0.00059296
C11	19	JUN	0.167683	-0.00184012
C11	20	JUN	0.169374	-0.000520721
C11	21	JUN	0.169251	-0.00101645
C11	22	JUN	0.170597	-4.22913e-05
C11	23	JUN	0.174604	0.00359244
C11	24	JUN	0.177498	0.00611491
C11	25	JUN	0.189278	0.0175228
C11	26	JUN	0.207868	0.0357399
C11	27	JUN	0.242564	0.0700637
C11	28	JUN	0.303516	0.130644
C11	29	JUN	0.397239	0.223995
C11	30	JUN	0.52526	0.351644
C11	31	JUN	0.66734	0.493352
C11	32	JUN	0.800359	0.625999
C11	33	JUN	0.910632	0.7359
C11	34	JUN	0.994192	0.819087
C11	35	JUN	1.05856	0.883085
C11	36	JUN	1.10849	0.932639
C11	37	JUN	1.14529	0.969069
C11	38	JUN	1.17222	0.995626
C11	39	JUN	1.19969	1.02272
C11	40	JUN	1.21816	1.04082
C11	41	JUN	1.23237	1.05467
C11	42	JUN	1.24242	1.06434
C11	43	JUN	1.25316	1.07471
C11	44	JUN	1.26436	1.08553
C11	45	JUN	1.27034	1.09114
C12	1	JUN	0.18473	0.00423039
C12	2	JUN	0.183367	0.00243249
C12	3	JUN	0.18142	4.9423e-05
C12	4	JUN	0.1803	-0.00150629
C12	5	JUN	0.181433	-0.000808524
C12	6	JUN	0.182423	-0.000254364
C12	7	JUN	0.183878	0.000765398
C12	8	JUN	0.184427	0.000878976
C12	9	JUN	0.185365	0.00138177
C12	10	JUN	0.18494	0.000520962
C12	11	JUN	0.184845	-9.62245e-06
C12	12	JUN	0.186938	0.00164803
C12	13	JUN	0.18585	0.000124386
C12	14	JUN	0.186525	0.00036437
C12	15	JUN	0.186439	-0.000157185
C12	16	JUN	0.185985	-0.00104668
C12	17	JUN	0.187302	-0.000165259
C12	18	JUN	0.186688	-0.00121554
C12	19	JUN	0.186855	-0.00148355
C12	20	JUN	0.187693	-0.00108165
C12	21	JUN	0.187439	-0.00177063
C12	22	JUN	0.190443	0.000798151
C12	23	JUN	0.193049	0.00296782
C12	24	JUN	0.201801	0.0112847
C12	25	JUN	0.213725	0.0227735
C12	26	JUN	0.238029	0.0466418
C12	27	JUN	0.283057	0.0912342
C12	28	JUN	0.358103	0.165844
C12	29	JUN	0.465692	0.272998
C12	30	JUN	0.599646	0.406517
C12	31	JUN	0.737359	0.543794
C12	32	JUN	0.861707	0.667707
C12	33	JUN	0.958818	0.764382
C12	34	JUN	1.0342	0.839327
C12	35	JUN	1.09444	0.899135
C12	36	JUN	1.13633	0.940592
C12	37	JUN	1.17062	0.974444
C12	38	JUN	1.1975	1.00089
C12	39	JUN	1.22369	1.02664
C12	40	JUN	1.24263	1.04514
C12	41	JUN	1.25633	1.05841
C12	42	JUN	1.26244	1.06409
C12	43	JUN	1.27784	1.07905
C12	44	JUN	1.28774	1.08851
C12	45	JUN	1.29328	1.09362
D1	1	VEGFA	0.16226	0.00375114
D1	2	VEGFA	0.15954	0.00050966
D1	3	VEGFA	0.161028	0.00147707
D1	4	VEGFA	0.161619	0.00154634
D1	5	VEGFA	0.161046	0.000452592
D1	6	VEGFA	0.160347	-0.000768443
D1	7	VEGFA	0.161349	-0.000286931
D1	8	VEGFA	0.163172	0.00101443
D1	9	VEGFA	0.161612	-0.00106639
D1	10	VEGFA	0.161618	-0.00158147
D1	11	VEGFA	0.163124	-0.000596906
D1	12	VEGFA	0.163056	-0.00118597
D1	13	VEGFA	0.163878	-0.000885088
D1	14	VEGFA	0.163626	-0.00165809
D1	15	VEGFA	0.164063	-0.00174237
D1	16	VEGFA	0.166959	0.000631764
D1	17	VEGFA	0.167958	0.00110955
D1	18	VEGFA	0.170909	0.00353991
D1	19	VEGFA	0.178316	0.0104251
D1	20	VEGFA	0.1926	0.0241882
D1	21	VEGFA	0.217036	0.0481029
D1	22	VEGFA	0.262735	0.093281
D1	23	VEGFA	0.340092	0.170117
D1	24	VEGFA	0.456745	0.286249
D1	25	VEGFA	0.602843	0.431826
D1	26	VEGFA	0.754092	0.582553
D1	27	VEGFA	0.882166	0.710106
D1	28	VEGFA	0.97682	0.804239
D1	29	VEGFA	1.04852	0.875418
D1	30	VEGFA	1.09999	0.92637
D1	31	VEGFA	1.14169	0.96754
D1	32	VEGFA	1.16602	0.991354
D1	33	VEGFA	1.18944	1.01425
D1	34	VEGFA	1.2084	1.03269
D1	35	VEGFA	1.22374	1.04751
D1	36	VEGFA	1.23113	1.05438
D1	37	VEGFA	1.24301	1.06574
D1	38	VEGFA	1.25084	1.07305
D1	39	VEGFA	1.25664	1.07832
D1	40	VEGFA	1.25903	1.08019
D1	41	VEGFA	1.26447	1.08511
D1	42	VEGFA	1.266	1.08612
D1	43	VEGFA	1.26595	1.08555
D1	44	VEGFA	1.26564	1.08472
D1	45	VEGFA	1.26584	1.08439
D2	1	VEGFA	0.166919	0.00217472
D2	2	VEGFA	0.166124	0.000664999
D2	3	VEGFA	0.166655	0.000482525
D2	4	VEGFA	0.166692	-0.000194323
D2	5	VEGFA	0.167723	0.00012278
D2	6	VEGFA	0.168783	0.000469283
D2	7	VEGFA	0.169831	0.000803433
D2	8	VEGFA	0.170541	0.000799059
D2	9	VEGFA	0.17069	0.000233998
D2	10	VEGFA	0.170533	-0.000637028
D2	11	VEGFA	0.171636	-0.000247892
D2	12	VEGFA	0.172245	-0.00035203
D2	13	VEGFA	0.171327	-0.00198436
D2	14	VEGFA	0.171696	-0.00232961
D2	15	VEGFA	0.173823	-0.000915722
D2	16	VEGFA	0.1757	0.000246903
D2	17	VEGFA	0.175925	-0.000241983
D2	18	VEGFA	0.180626	0.00374496
D2	19	VEGFA	0.185164	0.00756917
D2	20	VEGFA	0.198977	0.0206681
D2	21	VEGFA	0.225396	0.0463738
D2	22	VEGFA	0.269825	0.0900887
D2	23	VEGFA	0.343916	0.163466
D2	24	VEGFA	0.459091	0.277927
D2	25	VEGFA	0.601051	0.419174
D2	26	VEGFA	0.747233	0.564641
D2	27	VEGFA	0.874681	0.691376
D2	28	VEGFA	0.968139	0.784119
D2	29	VEGFA	1.03579	0.851053
D2	30	VEGFA	1.08701	0.90156
D2	31	VEGFA	1.12743	0.941267
D2	32	VEGFA	1.15235	0.965474
D2	33	VEGFA	1.17273	0.98514
D2	34	VEGFA	1.19212	1.00382
D2	35	VEGFA	1.20577	1.01676
D2	36	VEGFA	1.21365	1.02392
D2	37	VEGFA	1.22177	1.03132
D2	38	VEGFA	1.22764	1.03648
D2	39	VEGFA	1.23668	1.04481
D2	40	VEGFA	1.24217	1.04959
D2	41	VEGFA	1.24735	1.05405
D2	42	VEGFA	1.24693	1.05292
D2	43	VEGFA	1.24737	1.05264
D2	44	VEGFA	1.24837	1.05293
D2	45	VEGFA	1.25189	1.05574
D3	1	VEGFA	0.154438	0.0016744
D3	2	VEGFA	0.153078	-0.000371124
D3	3	VEGFA	0.153638	-0.000496771
D3	4	VEGFA	0.155564	0.000743781
D3	5	VEGFA	0.157052	0.00154674
D3	6	VEGFA	0.156287	9.65632e-05
D3	7	VEGFA	0.157068	0.000191364
D3	8	VEGFA	0.15794	0.000378552
D3	9	VEGFA	0.157964	-0.000283536
D3	10	VEGFA	0.158555	-0.000377533
D3	11	VEGFA	0.159148	-0.000470457
D3	12	VEGFA	0.159545	-0.000759137
D3	13	VEGFA	0.159433	-0.00155602
D3	14	VEGFA	0.159788	-0.00188705
D3	15	VEGFA	0.161291	-0.00106939
D3	16	VEGFA	0.163987	0.000941114
D3	17	VEGFA	0.163687	-4.39569e-05
D3	18	VEGFA	0.167462	0.00304574
D3	19	VEGFA	0.174799	0.00969686
D3	20	VEGFA	0.187919	0.0221319
D3	21	VEGFA	0.213547	0.0470738
D3	22	VEGFA	0.258902	0.0917439
D3	23	VEGFA	0.33541	0.167566
D3	24	VEGFA	0.450524	0.281995
D3	25	VEGFA	0.593975	0.42476
D3	26	VEGFA	0.741179	0.571278
D3	27	VEGFA	0.865361	0.694775
D3	28	VEGFA	0.956439	0.785168
D3	29	VEGFA	1.02382	0.851864
D3	30	VEGFA	1.07291	0.900267
D3	31	VEGFA	1.11216	0.938836
D3	32	VEGFA	1.13841	0.9644
D3	33	VEGFA	1.15742	0.982719
D3	34	VEGFA	1.17479	0.999403
D3	35	VEGFA	1.19172	1.01565
D3	36	VEGFA	1.20346	1.0267
D3	37	VEGFA	1.20678	1.02934
D3	38	VEGFA	1.21727	1.03915
D3	39	VEGFA	1.22412	1.04531
D3	40	VEGFA	1.22924	1.04974
D3	41	VEGFA	1.22931	1.04913
D3	42	VEGFA	1.23145	1.05059
D3	43	VEGFA	1.2316	1.05004
D3	44	VEGFA	1.23402	1.05178
D3	45	VEGFA	1.23423	1.05131
D4	1	LI-6	0.176952	0.00158974
D4	2	LI-6	0.173637	-0.00214286
D4	3	LI-6	0.176466	0.000267568
D4	4	LI-6	0.176279	-0.000337595
D4	5	LI-6	0.176462	-0.000572807
D4	6	LI-6	0.177142	-0.000310902
D4	7	LI-6	0.17813	0.000258176
D4	8	LI-6	0.179515	0.00122523
D4	9	LI-6	0.17873	2.1834e-05
D4	10	LI-6	0.179533	0.000406853
D4	11	LI-6	0.180498	0.000953564
D4	12	LI-6	0.18068	0.000717354
D4	13	LI-6	0.180475	9.43684e-05
D4	14	LI-6	0.18126	0.000460686
D4	15	LI-6	0.18121	-7.44603e-06
D4	16	LI-6	0.180389	-0.00124627
D4	17	LI-6	0.181189	-0.000865211
D4	18	LI-6	0.181639	-0.000832918
D4	19	LI-6	0.182	-0.00089024
D4	20	LI-6	0.182229	-0.00107963
D4	21	LI-6	0.181727	-0.00199934
D4	22	LI-6	0.183731	-0.000414215
D4	23	LI-6	0.184782	0.000219117
D4	24	LI-6	0.186328	0.00134687
D4	25	LI-6	0.187985	0.00258495
D4	26	LI-6	0.194897	0.00907904
D4	27	LI-6	0.206258	0.0200219
D4	28	LI-6	0.22827	0.0416151
D4	29	LI-6	0.267879	0.0808068
D4	30	LI-6	0.337879	0.150388
D4	31	LI-6	0.452256	0.264347
D4	32	LI-6	0.60879	0.420462
D4	33	LI-6	0.780087	0.591341
D4	34	LI-6	0.92437	0.735206
D4	35	LI-6	1.02231	0.832732
D4	36	LI-6	1.07778	0.887777
D4	37	LI-6	1.1152	0.924781
D4	38	LI-6	1.14637	0.955532
D4	39	LI-6	1.17363	0.982375
D4	40	LI-6	1.19411	1.00244
D4	41	LI-6	1.20601	1.01392
D4	42	LI-6	1.22017	1.02766
D4	43	LI-6	1.23354	1.04061
D4	44	LI-6	1.2449	1.05155
D4	45	LI-6	1.25233	1.05856
D5	1	LI-6	0.139139	0.0029335
D5	2	LI-6	0.13655	-9.30761e-05
D5	3	LI-6	0.13643	-0.000651085
D5	4	LI-6	0.137712	0.000193076
D5	5	LI-6	0.138036	7.95249e-05
D5	6	LI-6	0.138919	0.000524707
D5	7	LI-6	0.139673	0.000840622
D5	8	LI-6	0.139923	0.000653593
D5	9	LI-6	0.140732	0.00102448
D5	10	LI-6	0.141425	0.00127949
D5	11	LI-6	0.140418	-0.000164987
D5	12	LI-6	0.141085	6.43674e-05
D5	13	LI-6	0.141356	-0.000103201
D5	14	LI-6	0.142133	0.000236824
D5	15	LI-6	0.142727	0.000392805
D5	16	LI-6	0.141386	-0.0013867
D5	17	LI-6	0.142329	-0.000881254
D5	18	LI-6	0.141886	-0.00176135
D5	19	LI-6	0.143064	-0.00102187
D5	20	LI-6	0.143135	-0.00138797
D5	21	LI-6	0.14303	-0.00193084
D5	22	LI-6	0.144205	-0.0011941
D5	23	LI-6	0.143244	-0.00259264
D5	24	LI-6	0.146152	-0.000122579
D5	25	LI-6	0.149227	0.00251473
D5	26	LI-6	0.152545	0.00539434
D5	27	LI-6	0.160753	0.0131645
D5	28	LI-6	0.176982	0.0289564
D5	29	LI-6	0.207562	0.0590987
D5	30	LI-6	0.261957	0.113056
D5	31	LI-6	0.356627	0.207288
D5	32	LI-6	0.495132	0.345355
D5	33	LI-6	0.664873	0.514658
D5	34	LI-6	0.823808	0.673155
D5	35	LI-6	0.941747	0.790657
D5	36	LI-6	1.01143	0.859897
D5	37	LI-6	1.05564	0.903674
D5	38	LI-6	1.08726	0.934852
D5	39	LI-6	1.11692	0.964082
D5	40	LI-6	1.14139	0.98811
D5	41	LI-6	1.15433	1.00061
D5	42	LI-6	1.16518	1.01103
D5	43	LI-6	1.17905	1.02445
D5	44	LI-6	1.19036	1.03533
D5	45	LI-6	1.20198	1.04651
D6	1	LI-6	0.136204	2.95332e-05
D6	2	LI-6	0.135652	-0.000965886
D6	3	LI-6	0.13633	-0.000732257
D6	4	LI-6	0.137808	0.000301817
D6	5	LI-6	0.138134	0.000184464
D6	6	LI-6	0.138125	-0.000268896
D6	7	LI-6	0.139369	0.000531022
D6	8	LI-6	0.140403	0.00112097
D6	9	LI-6	0.139894	0.000168523
D6	10	LI-6	0.141355	0.00118516
D6	11	LI-6	0.141468	0.000854455
D6	12	LI-6	0.142054	0.000996233
D6	13	LI-6	0.141608	0.000105822
D6	14	LI-6	0.141743	-0.000203175
D6	15	LI-6	0.141734	-0.000656013
D6	16	LI-6	0.142591	-0.000243153
D6	17	LI-6	0.142713	-0.000565159
D6	18	LI-6	0.141963	-0.00175891
D6	19	LI-6	0.142957	-0.00120889
D6	20	LI-6	0.143257	-0.00135233
D6	21	LI-6	0.142938	-0.00211574
D6	22	LI-6	0.143926	-0.00157217
D6	23	LI-6	0.144287	-0.00165441
D6	24	LI-6	0.145898	-0.000487555
D6	25	LI-6	0.148927	0.0020974
D6	26	LI-6	0.152546	0.00527279
D6	27	LI-6	0.160396	0.0126785
D6	28	LI-6	0.178384	0.030222
D6	29	LI-6	0.208837	0.060231
D6	30	LI-6	0.265015	0.115965
D6	31	LI-6	0.359785	0.210292
D6	32	LI-6	0.499797	0.34986
D6	33	LI-6	0.668893	0.518511
D6	34	LI-6	0.829233	0.678407
D6	35	LI-6	0.945854	0.794584
D6	36	LI-6	1.0169	0.86519
D6	37	LI-6	1.05953	0.907369
D6	38	LI-6	1.09361	0.941007
D6	39	LI-6	1.12107	0.968029
D6	40	LI-6	1.14413	0.990638
D6	41	LI-6	1.15861	1.00467
D6	42	LI-6	1.1717	1.01733
D6	43	LI-6	1.18458	1.02976
D6	44	LI-6	1.19746	1.04219
D6	45	LI-6	1.20429	1.04858
D7	1	MAPK3	0.144627	0.00267997
D7	2	MAPK3	0.142395	-0.000214999
D7	3	MAPK3	0.143088	-0.000184993
D7	4	MAPK3	0.143926	-1.01327e-05
D7	5	MAPK3	0.145204	0.000604953
D7	6	MAPK3	0.145779	0.00051712
D7	7	MAPK3	0.146052	0.000127301
D7	8	MAPK3	0.147412	0.000824984
D7	9	MAPK3	0.148274	0.00102351
D7	10	MAPK3	0.148072	0.000159161
D7	11	MAPK3	0.148515	-6.08151e-05
D7	12	MAPK3	0.149441	0.000202379
D7	13	MAPK3	0.147996	-0.00190572
D7	14	MAPK3	0.149223	-0.00134179
D7	15	MAPK3	0.150043	-0.00118493
D7	16	MAPK3	0.15073	-0.0011604
D7	17	MAPK3	0.150881	-0.0016727
D7	18	MAPK3	0.151915	-0.00130116
D7	19	MAPK3	0.154973	0.00109391
D7	20	MAPK3	0.158811	0.00426933
D7	21	MAPK3	0.166784	0.0115796
D7	22	MAPK3	0.182462	0.0265946
D7	23	MAPK3	0.209586	0.0530554
D7	24	MAPK3	0.257228	0.100034
D7	25	MAPK3	0.335312	0.177455
D7	26	MAPK3	0.445374	0.286855
D7	27	MAPK3	0.577019	0.417837
D7	28	MAPK3	0.70385	0.544005
D7	29	MAPK3	0.810471	0.649963
D7	30	MAPK3	0.897986	0.736816
D7	31	MAPK3	0.96498	0.803147
D7	32	MAPK3	1.01414	0.851648
D7	33	MAPK3	1.0474	0.884236
D7	34	MAPK3	1.07922	0.915402
D7	35	MAPK3	1.10452	0.940039
D7	36	MAPK3	1.12271	0.95756
D7	37	MAPK3	1.13404	0.968231
D7	38	MAPK3	1.14681	0.980332
D7	39	MAPK3	1.1586	0.991459
D7	40	MAPK3	1.16751	0.999713
D7	41	MAPK3	1.17173	1.00327
D7	42	MAPK3	1.17557	1.00644
D7	43	MAPK3	1.17936	1.00957
D7	44	MAPK3	1.18752	1.01707
D7	45	MAPK3	1.18861	1.0175
D8	1	MAPK3	0.136106	0.00343387
D8	2	MAPK3	0.133915	0.000683591
D8	3	MAPK3	0.13405	0.000259787
D8	4	MAPK3	0.13483	0.00048092
D8	5	MAPK3	0.134624	-0.000284255
D8	6	MAPK3	0.135571	0.000103459
D8	7	MAPK3	0.136983	0.000956446
D8	8	MAPK3	0.137174	0.00058873
D8	9	MAPK3	0.137895	0.000750854
D8	10	MAPK3	0.138024	0.000320017
D8	11	MAPK3	0.138505	0.000242322
D8	12	MAPK3	0.138192	-0.000629918
D8	13	MAPK3	0.13865	-0.000730352
D8	14	MAPK3	0.138636	-0.00130418
D8	15	MAPK3	0.138016	-0.00248313
D8	16	MAPK3	0.139573	-0.00148438
D8	17	MAPK3	0.139866	-0.00175062
D8	18	MAPK3	0.141113	-0.00106277
D8	19	MAPK3	0.144008	0.00127275
D8	20	MAPK3	0.148048	0.00475432
D8	21	MAPK3	0.155621	0.0117684
D8	22	MAPK3	0.171324	0.0269124
D8	23	MAPK3	0.198816	0.053845
D8	24	MAPK3	0.247463	0.101933
D8	25	MAPK3	0.327694	0.181605
D8	26	MAPK3	0.441816	0.295168
D8	27	MAPK3	0.578226	0.431019
D8	28	MAPK3	0.708754	0.560988
D8	29	MAPK3	0.81937	0.671044
D8	30	MAPK3	0.909321	0.760436
D8	31	MAPK3	0.978709	0.829265
D8	32	MAPK3	1.03041	0.880404
D8	33	MAPK3	1.06322	0.912656
D8	34	MAPK3	1.09338	0.942257
D8	35	MAPK3	1.1199	0.968218
D8	36	MAPK3	1.13679	0.984549
D8	37	MAPK3	1.15023	0.99743
D8	38	MAPK3	1.16223	1.00888
D8	39	MAPK3	1.17378	1.01986
D8	40	MAPK3	1.18072	1.02624
D8	41	MAPK3	1.18562	1.03059
D8	42	MAPK3	1.18917	1.03357
D8	43	MAPK3	1.19351	1.03736
D8	44	MAPK3	1.19773	1.04102
D8	45	MAPK3	1.20192	1.04465
D9	1	MAPK3	0.148336	0.00280575
D9	2	MAPK3	0.146875	0.000785815
D9	3	MAPK3	0.147236	0.000588695
D9	4	MAPK3	0.147163	-4.31513e-05
D9	5	MAPK3	0.148183	0.000417615
D9	6	MAPK3	0.149102	0.000778633
D9	7	MAPK3	0.148263	-0.000619043
D9	8	MAPK3	0.149869	0.000428606
D9	9	MAPK3	0.150323	0.000323873
D9	10	MAPK3	0.149873	-0.000684645
D9	11	MAPK3	0.151624	0.000507545
D9	12	MAPK3	0.150947	-0.00072817
D9	13	MAPK3	0.152152	-8.17204e-05
[truncated: 2,327 more rows]

## Sheet: BioGroup Analysis Result
Block Type	96alum
Chemistry	SYBR_GREEN
Experiment File Name	C:\Users\Administrator\Desktop\20211108-GAT.eds
Experiment Run End Time	Not Started
Instrument Type	sds7500
Passive Reference	ROX
Biogroup Name	Target Name	Task	RQ	RQ Min	RQ Max	Cт Mean	ΔCт Mean	ΔCт SE	ΔΔCт
Analysis Type	Singleplex
Endogenous Control	GAPDH
RQ Min/Max Confidence Level	95.0
Reference Biogroup Name
